# Supplementary material for: Transcriptome-Wide Identification of Novel Imprinted Genes in Neonatal Mouse Brain
Source: PubMed Central journal article supplement (PMC2585789; doi:10.1371/journal.pone.0003839), 2008-12-04
Supplement: pone.0003839.s001.pdf [file pone.0003839.s001.pdf]

**Figure S1.1. The quality score distribution of the Solexa data.**

A. 1) Quality score for lane 1, PWD x AKR.

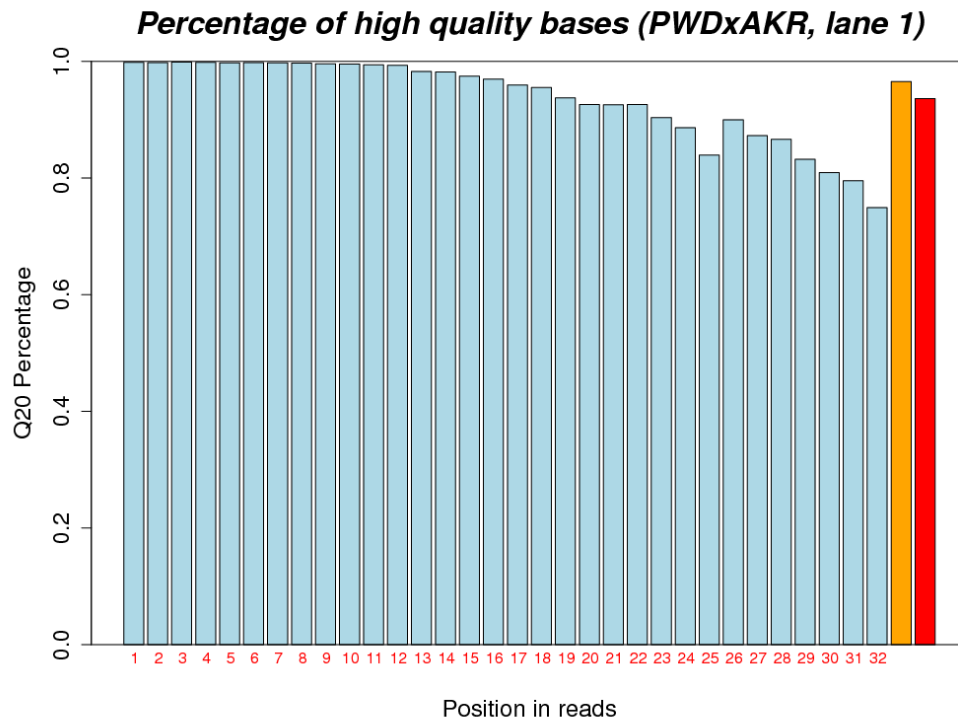

A. 2) Quality score for lane 2, PWD x AKR.

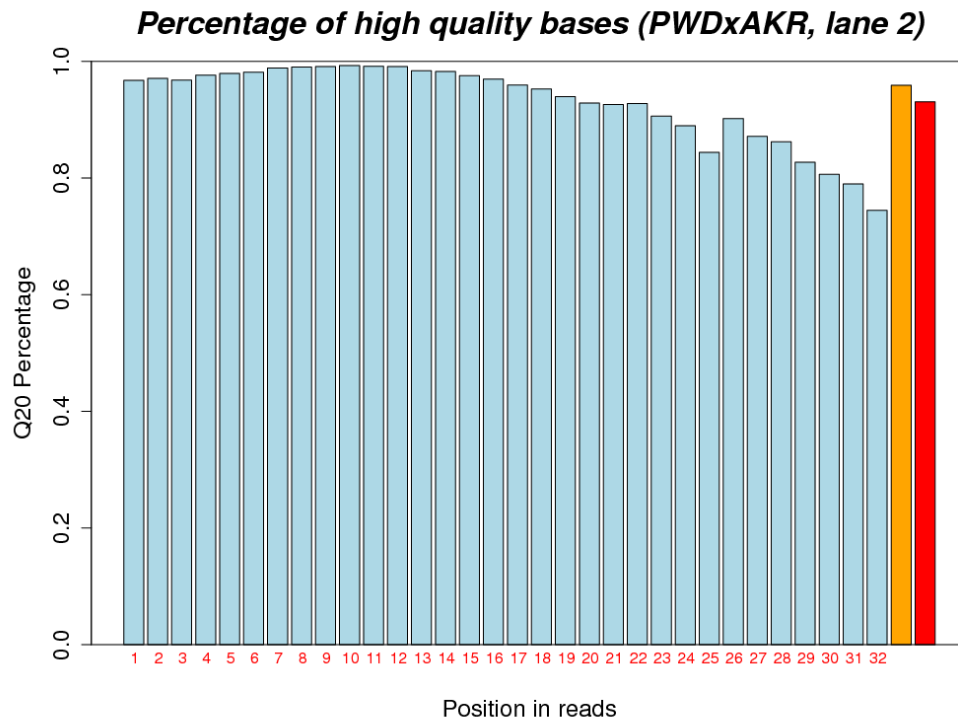

A. 3) Quality score for lane 3, PWD x AKR.

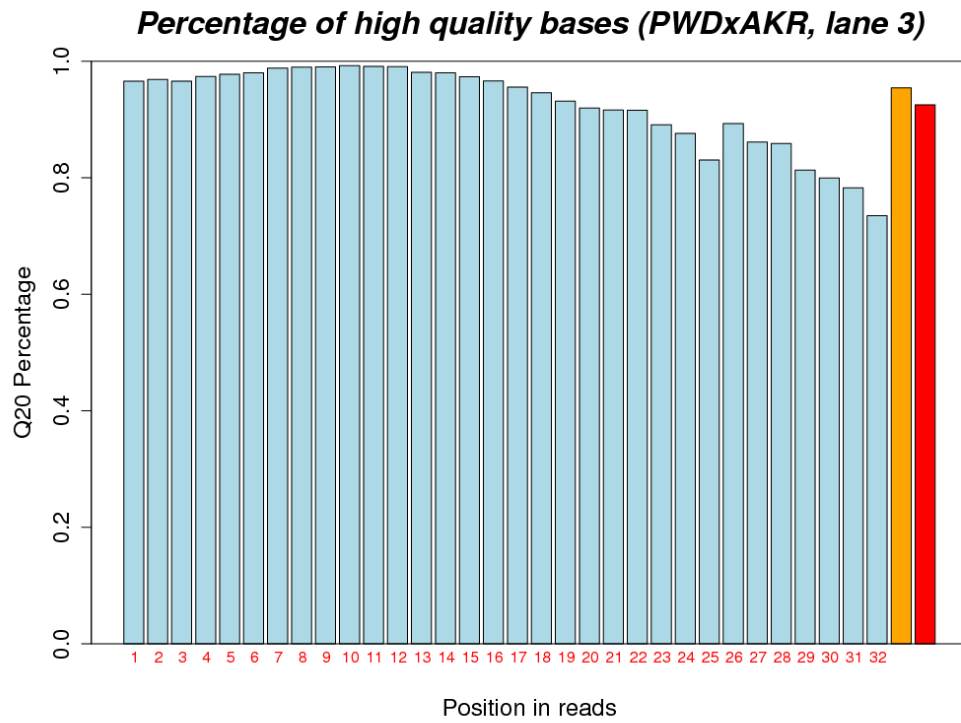

A. 4) Quality score for lane 4, PWD x AKR.

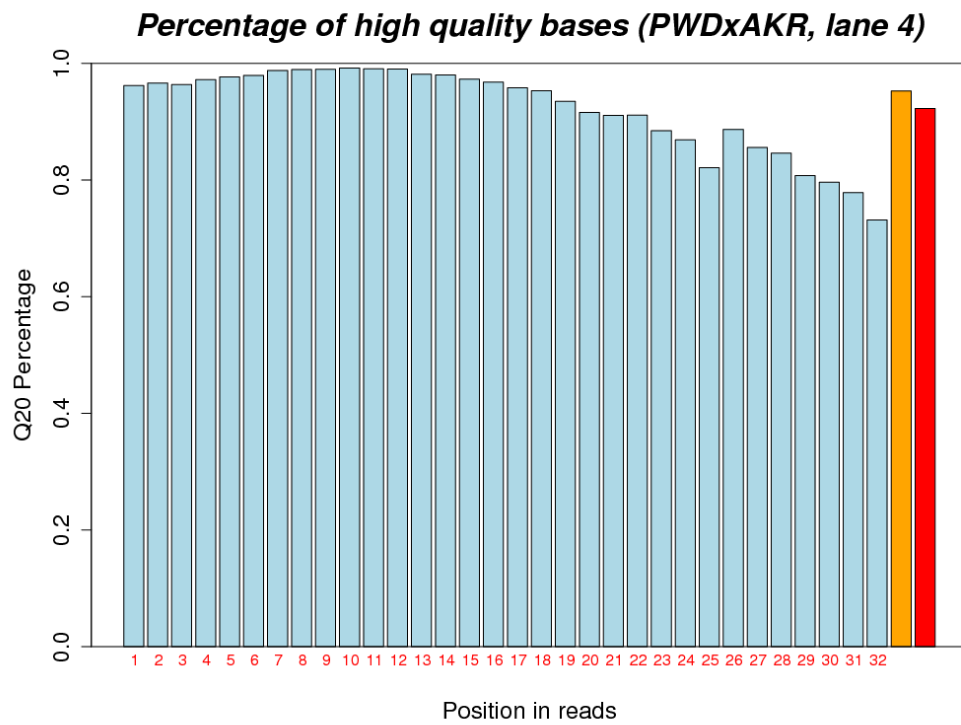

A. 5) Quality score for lane 6, PWD x AKR.

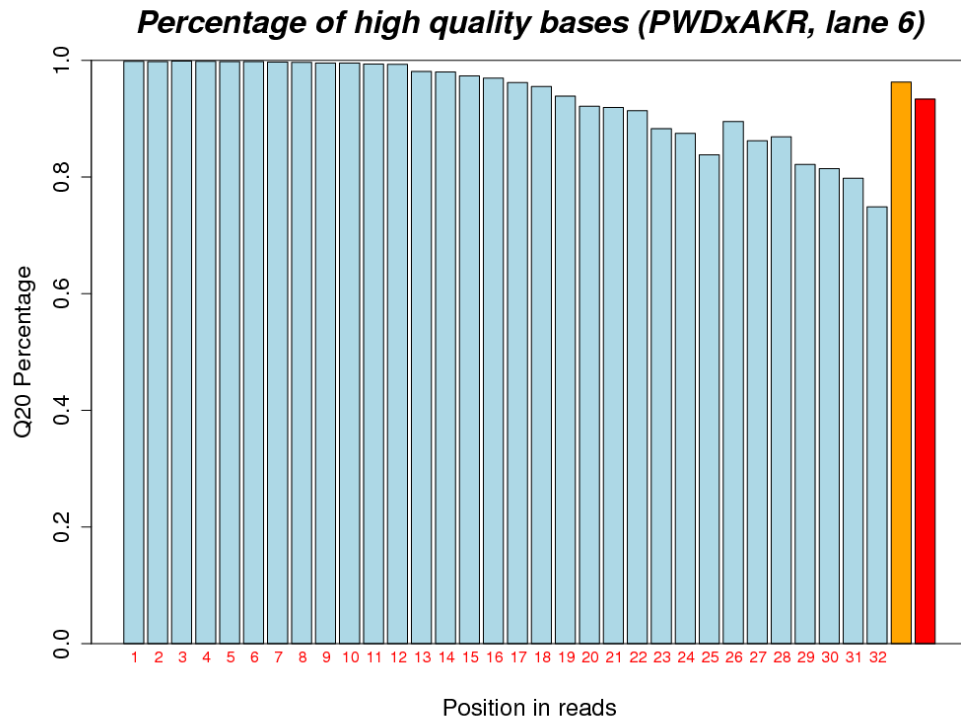

A. 6) Quality score for lane 7, PWD x AKR.

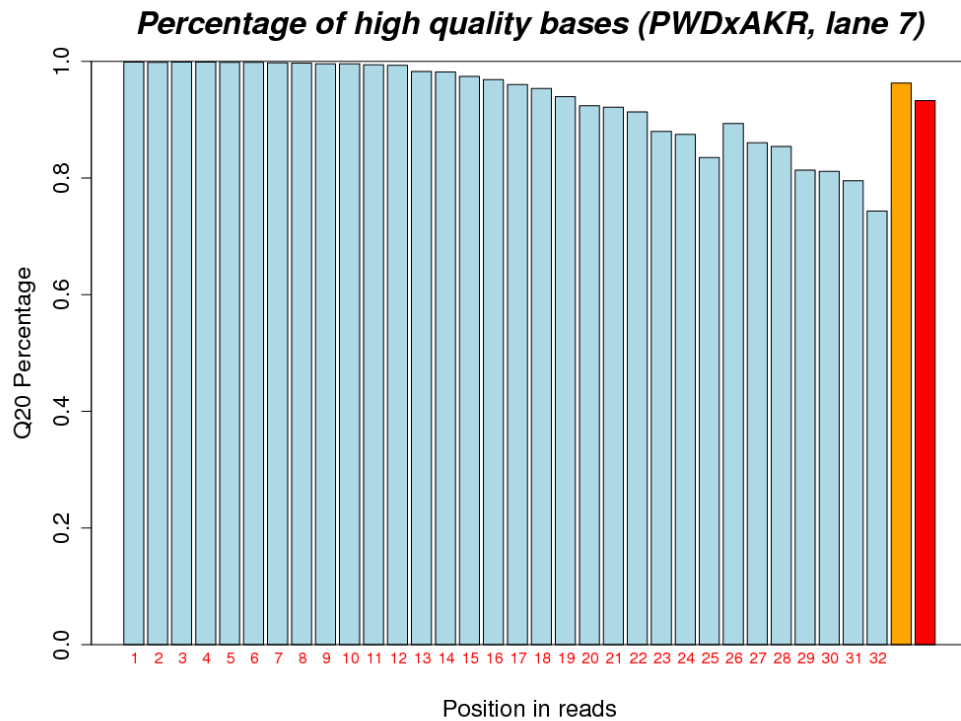

A. 7) Quality score for lane 8, PWD x AKR.

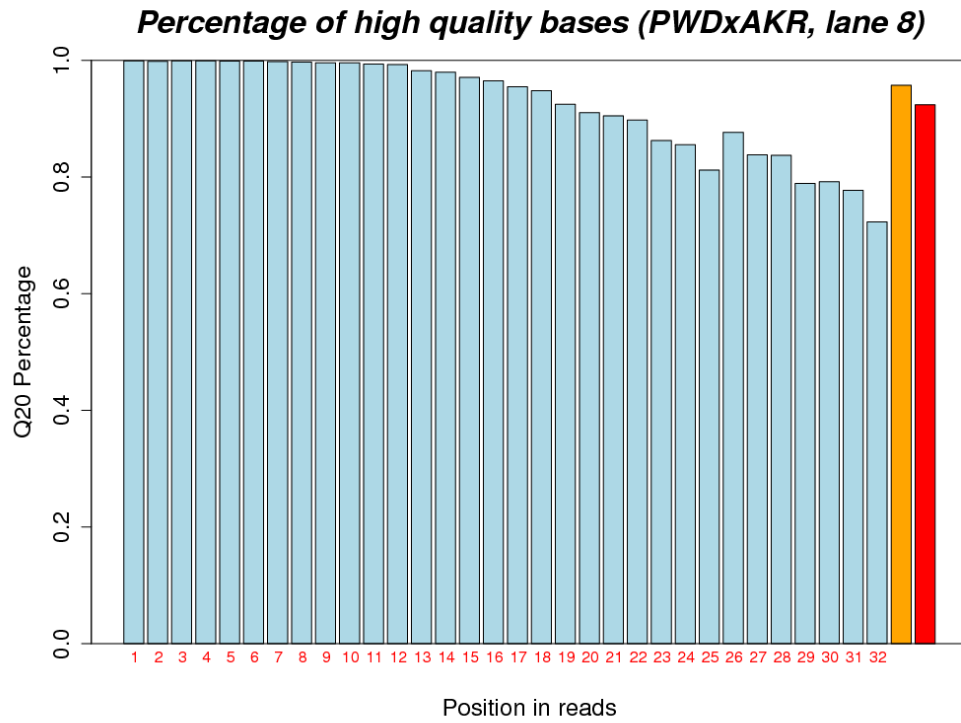

B. 1) Quality score for lane 1, AKR x PWD.

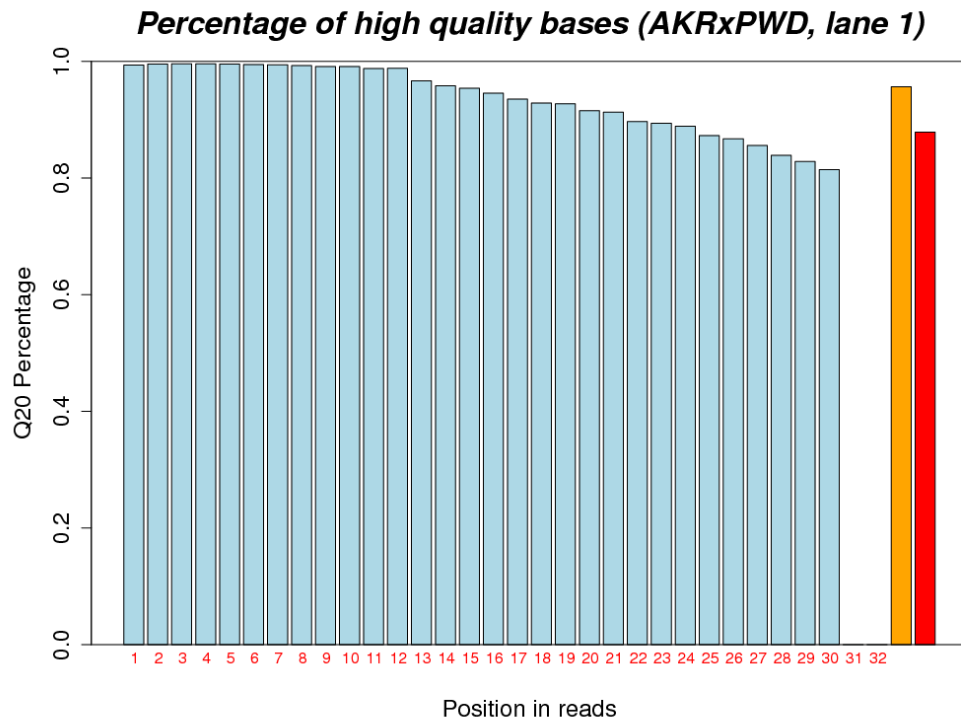

B. 2) Quality score for lane 2, AKR x PWD.

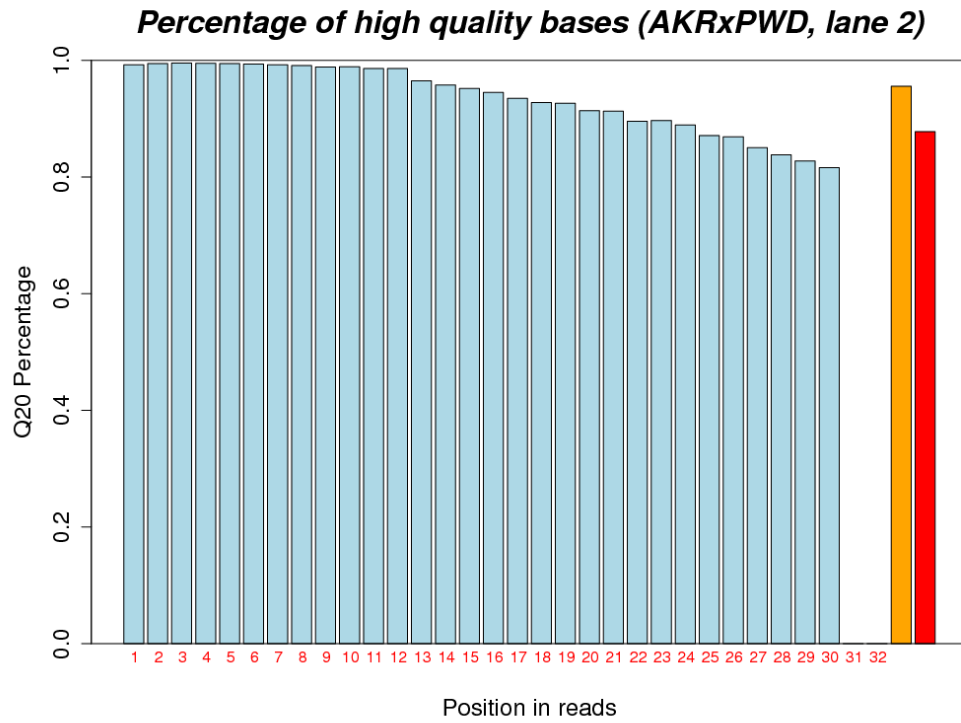

B. 3) Quality score for lane 3, AKR x PWD.

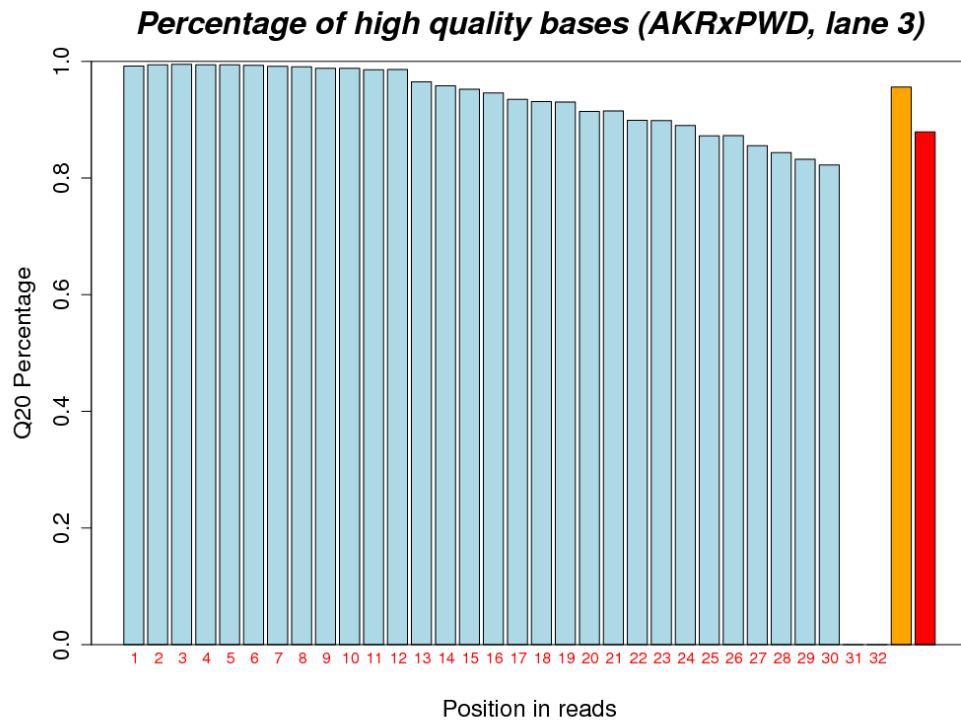

B. 4) Quality score for lane 4, AKR x PWD.

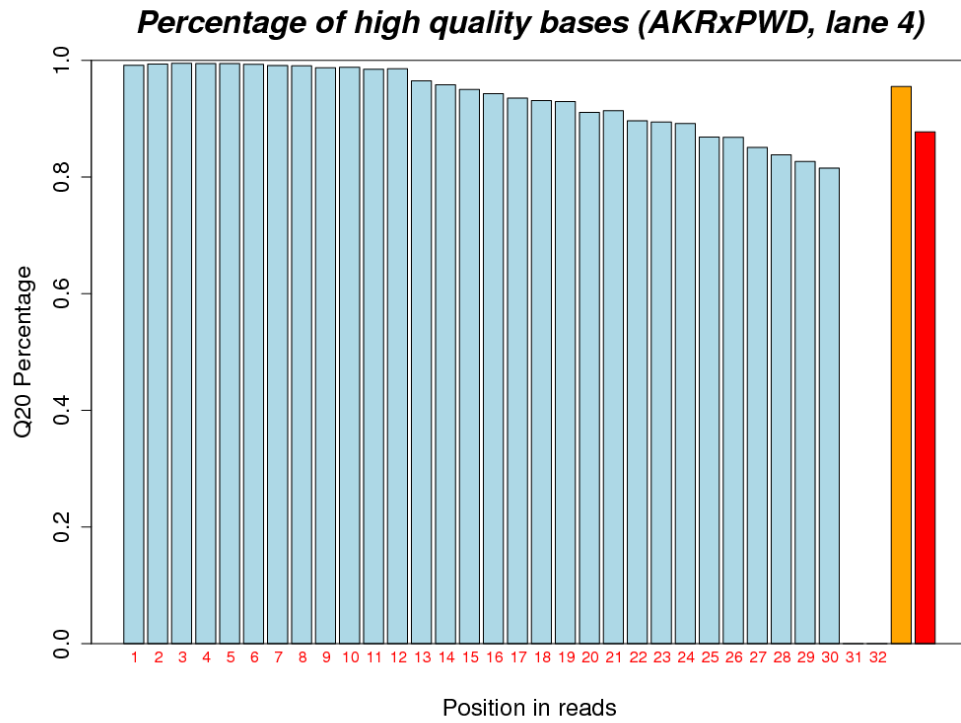

B. 5) Quality score for lane 5, AKR x PWD.

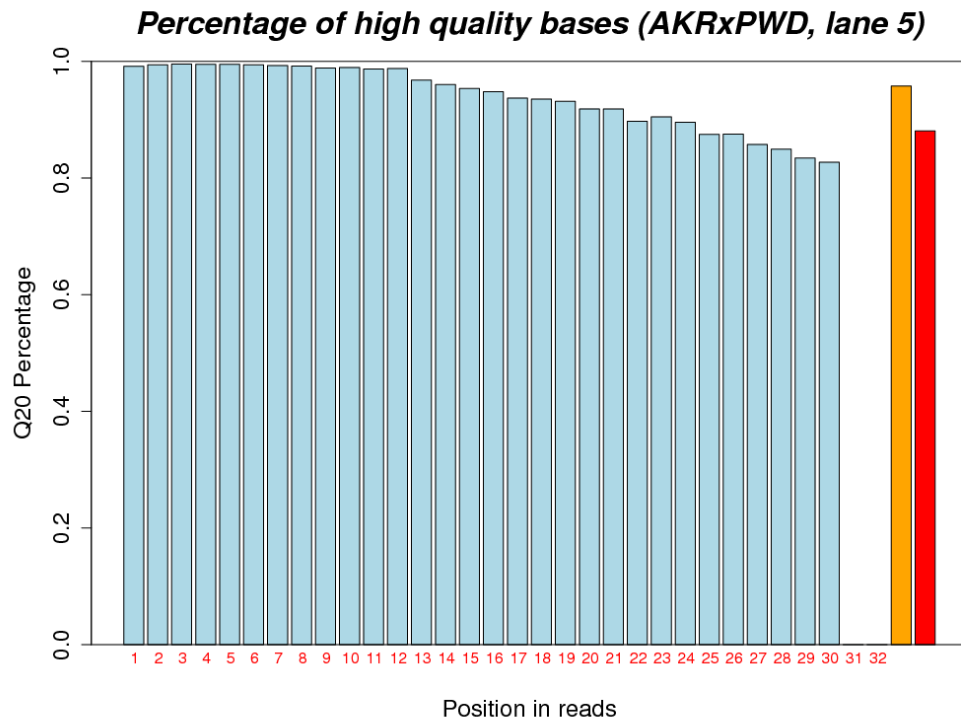

B. 6) Quality score for lane 6, AKR x PWD.

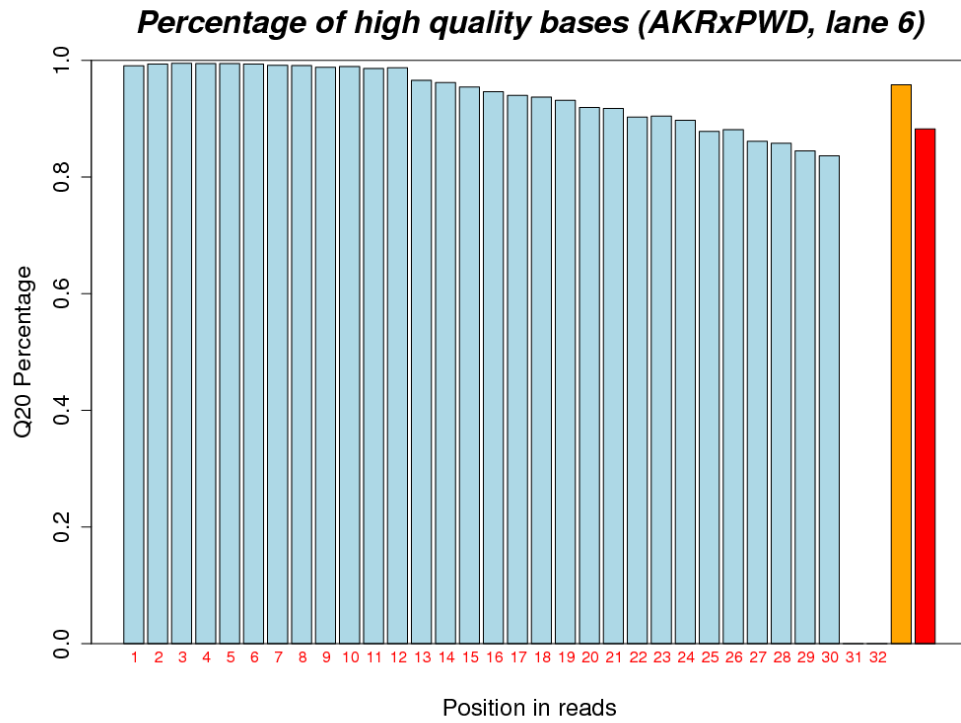

B. 7) Quality score for lane 7, AKR x PWD.

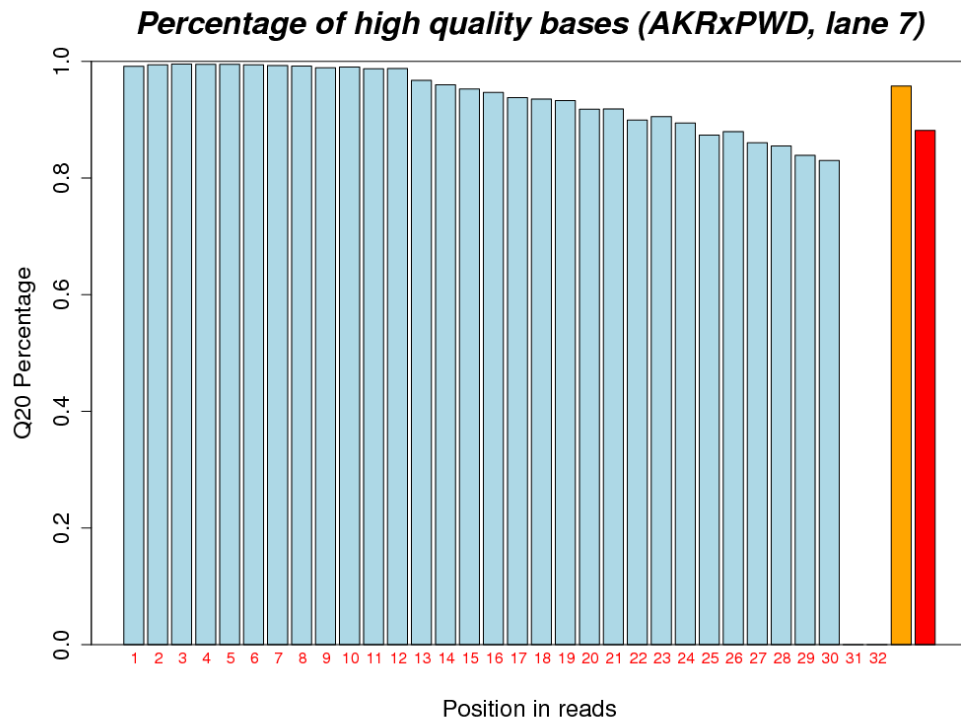

B. 8) Quality score for lane 8, AKR x PWD.

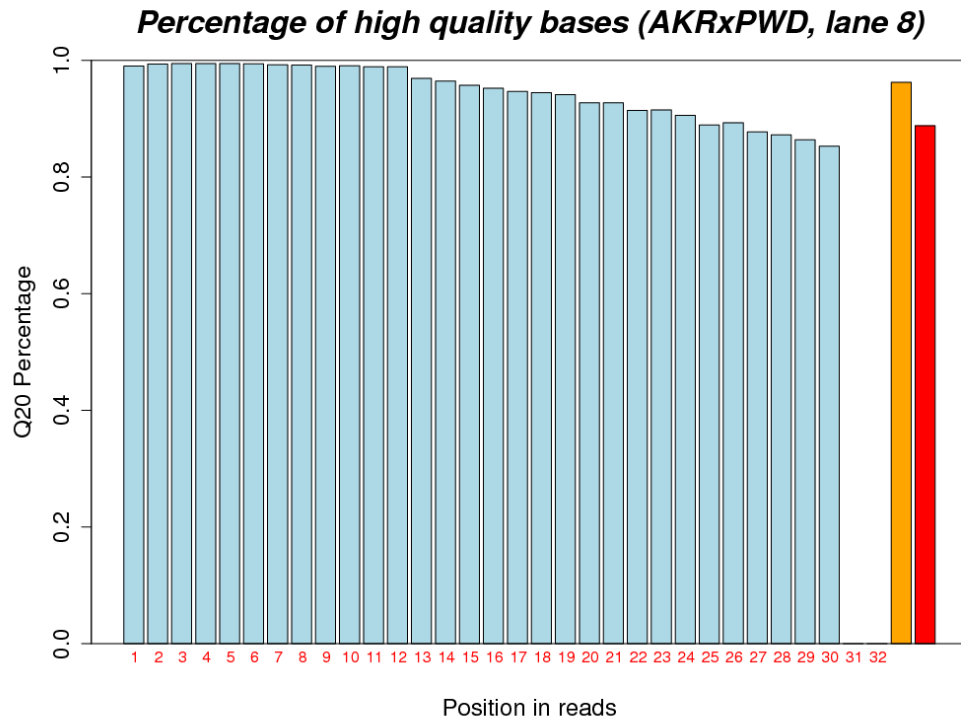

**Figure S1.1. The quality score distribution of the Solexa data.** (A). Quality score distribution for the seven lanes in the Solexa run of the PWD x AKR sample. (B). Quality score distribution for the eight lanes in the Solexa run of the AKR x PWD sample. Blue bar: position 1-32 in the Solexa reads. Orange bar: the first 25 bps. Red bar: all 32 bps.



**Figure S1.2 Verification for known imprinted gene *Inpp5f\_v2* and novel imprinted gene *Inpp5f*.**

A. SNP counts in the Solexa data.

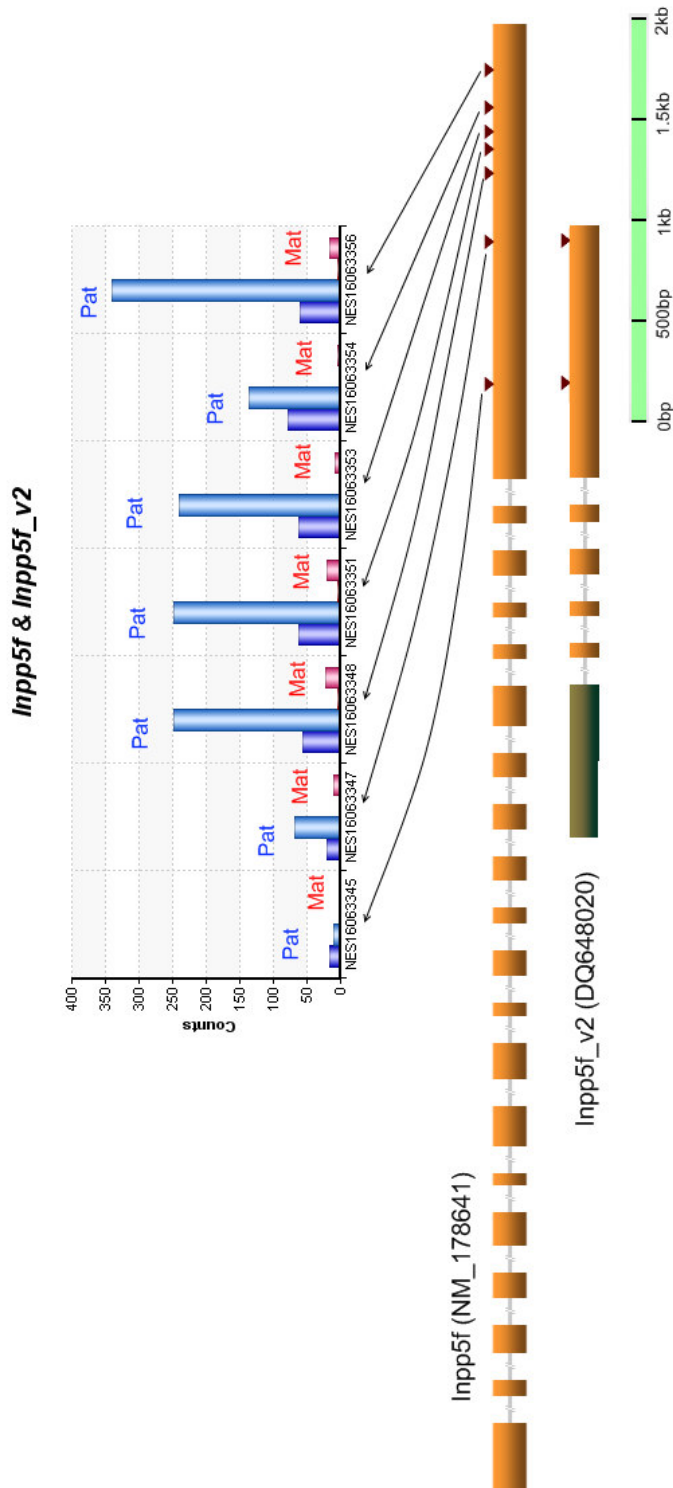

B. Sanger sequencing verification (NES16063356).

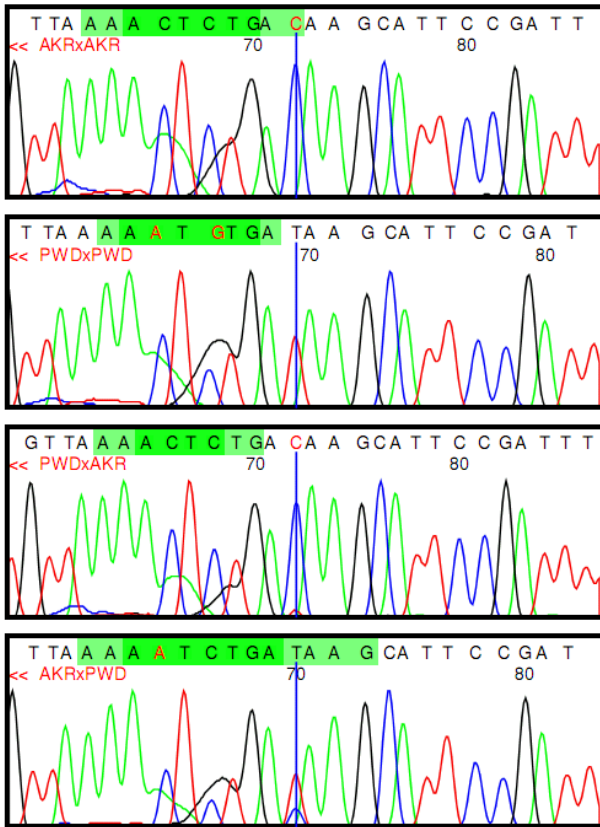

C. Pyrosequencing verification (NES16063356).

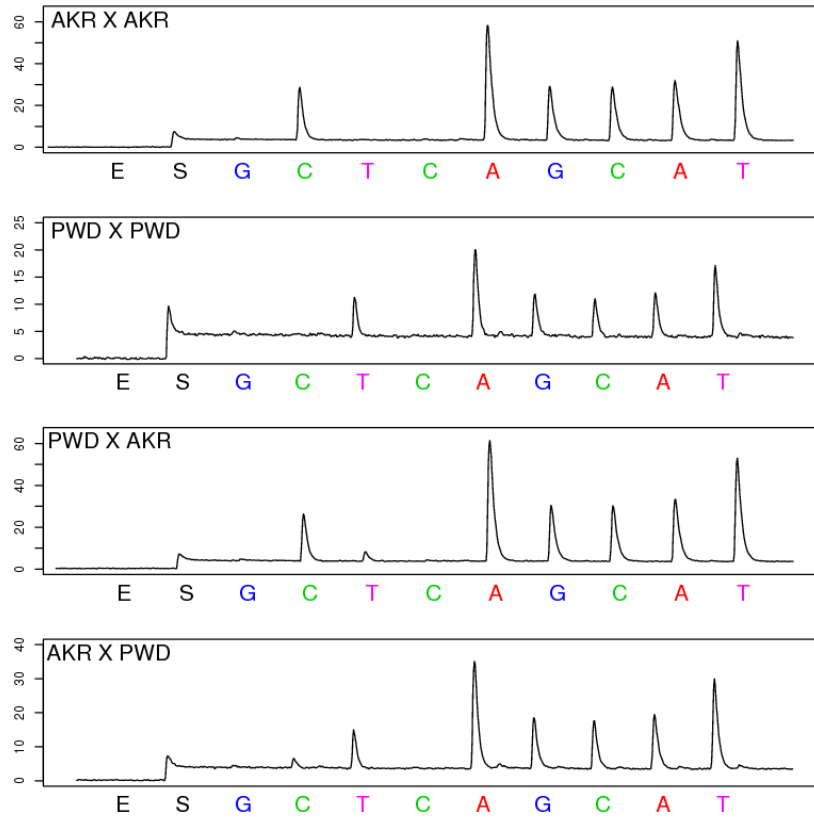

D. Pyrosequencing verification (NES16063345).

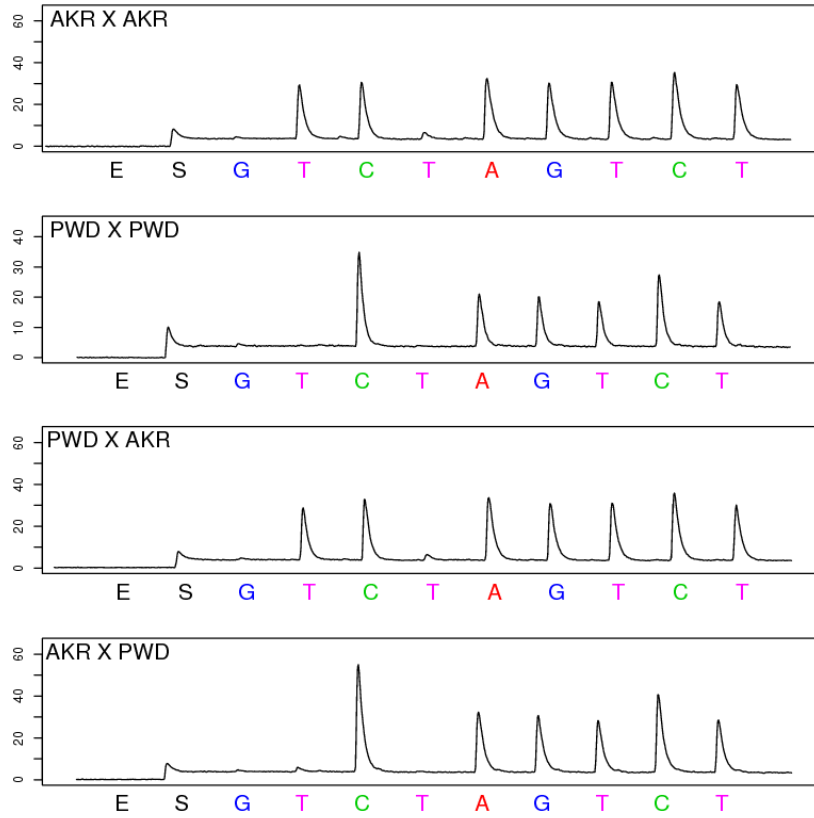

**Figure S1.2. Verification for known imprinted gene *Inpp5f\_v2* and novel imprinted gene *Inpp5f*.** **A**, Allele counts for Perlegen SNP NES16063345, NES16063347, NES16063348, NES16063351, NES16063353, NES16063354 and NES16063356. The blue bars (from left to right) stand for the counts from the paternal allele in PWD x AKR and AKR x PWD F1s respectively. The red bars represent the maternal allele counts. **B**, Sanger sequencing verification for Perlegen SNP NES16063356. The target sequence is CTCTGA(C/T)AAGCA. The only polymorphic site is the one with a blue straight line. The other one (the seventh nucleotide from the left) is a miscall from the software (please see the actual peak). **C**, Pyrosequencing sequencing verification for Perlegen SNP NES16063356. The target sequence is CTCTGA(C/T)AAGCA. **D**, Pyrosequencing sequencing verification for Perlegen SNP NES16063345. The target sequence is CGGTC(C/T)CAGTCT.

**Figure S1.3. Verification for known imprinted gene *Rasgrf1* (Novel SNP1).**

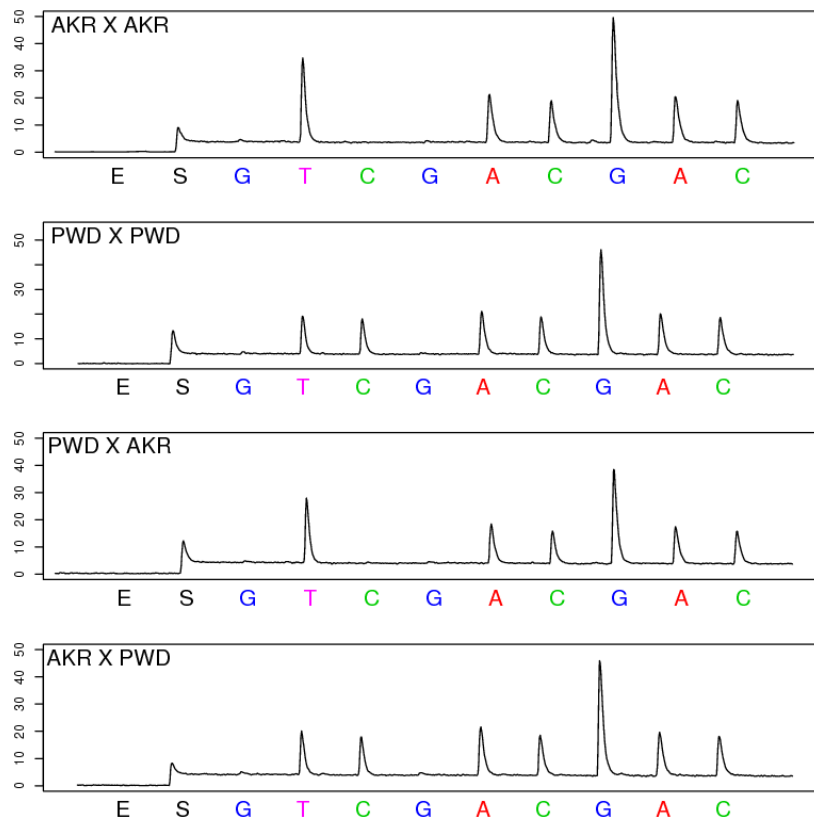

**Figure S1.3. Verification for known imprinted gene *Rasgrf1*.** Pyrosequencing verification for Novel SNP1 in *Rasgrf1*. The target sequence is T(C/T)ACGGGACAA.

**Figure S1.4. Verification for known imprinted gene *Zrsr1*.**

A. Sanger sequencing verification (NES08366940).

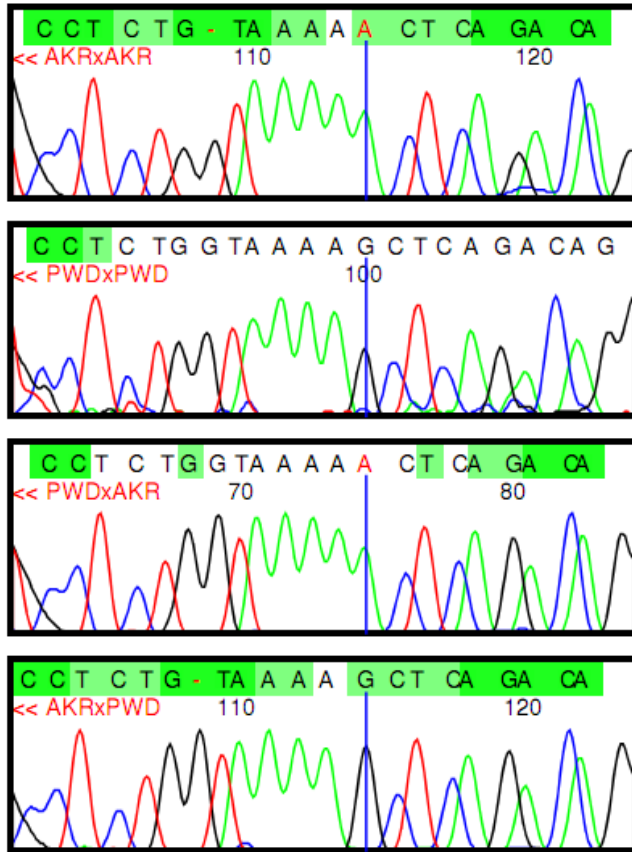

B. Pyrosequencing verification (NES08366940).

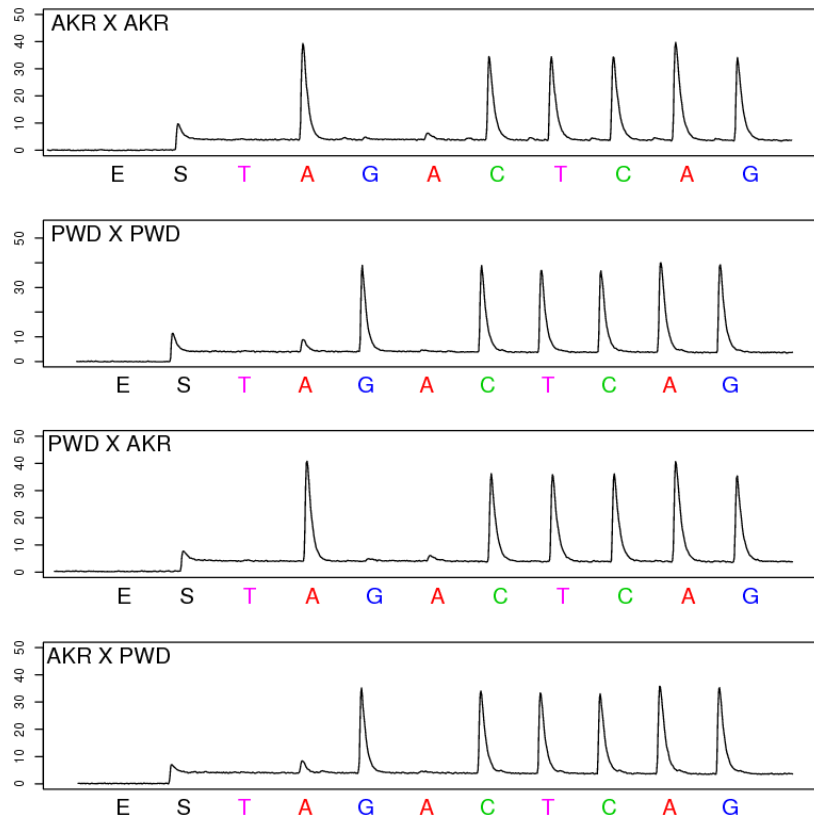

**Figure S1.4. Verification for known imprinted gene *Zrsr1*.** **A**, Sanger sequencing verification for Perlegen SNP NES08366940. The target sequence is GGTA AAA(A/G)CTCAGA. The only polymorphic site is the one with a blue straight line. The other one (the seventh nucleotide from the left) is a miscall from the software (please see the actual peak). **B**, Pyrosequencing sequencing verification for Perlegen SNP NES08366940. The target sequence is (A/G)CTCAGAC.



**Figure S1.5. Verification for known imprinted genes *Snrpn* and *Snurf* (NES16116930).**

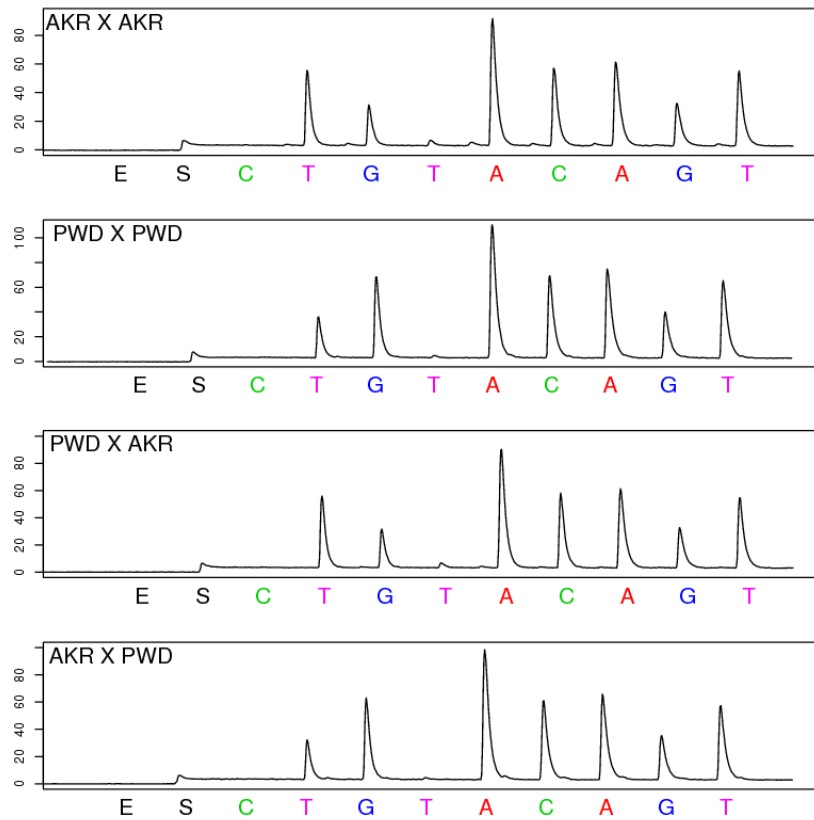

**Figure S1.5. Verification for known imprinted gene *Snrpn* and *Snurf*.** Pyrosequencing sequencing verification for Perlegen SNP NES16116930. The target sequence is (G/T)GAAACCAAGTTCT.

**Figure S1.6. Pyrosequencing verification of *Peg13* (Novel SNP3).**

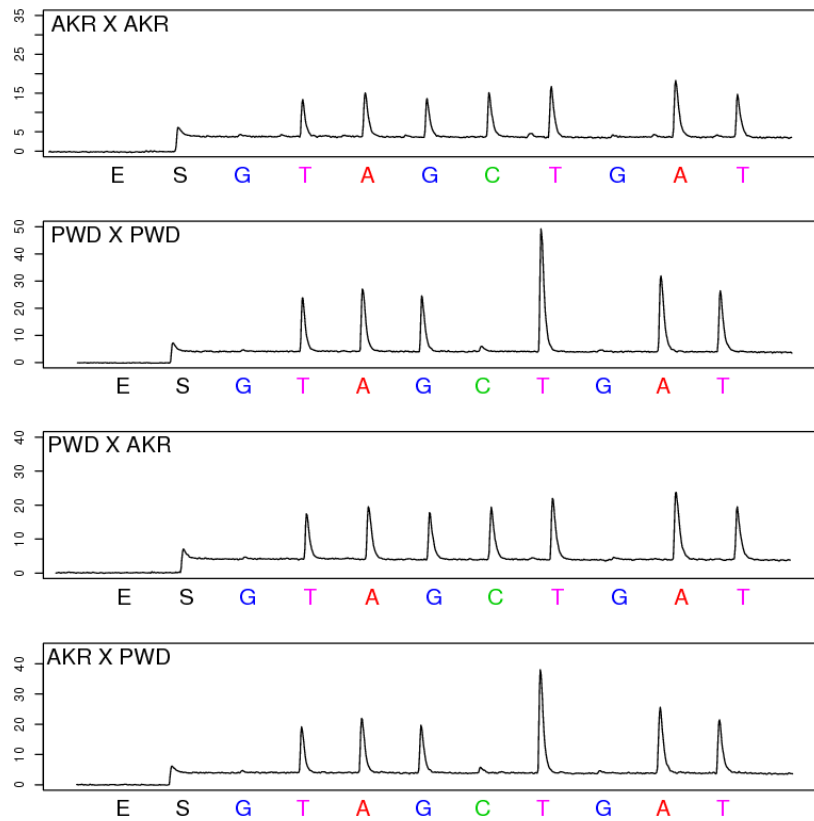

**Figure S1.6. Verification for known imprinted gene *Peg13*.** Pyrosequencing sequencing verification for novel SNP3 in *Peg13*. The target sequence is TAG(C/T)TATAG.

**Figure S1.7. Pyrosequencing verification of *Sgce*.**

A. Sanger sequencing verification (NES10338539).

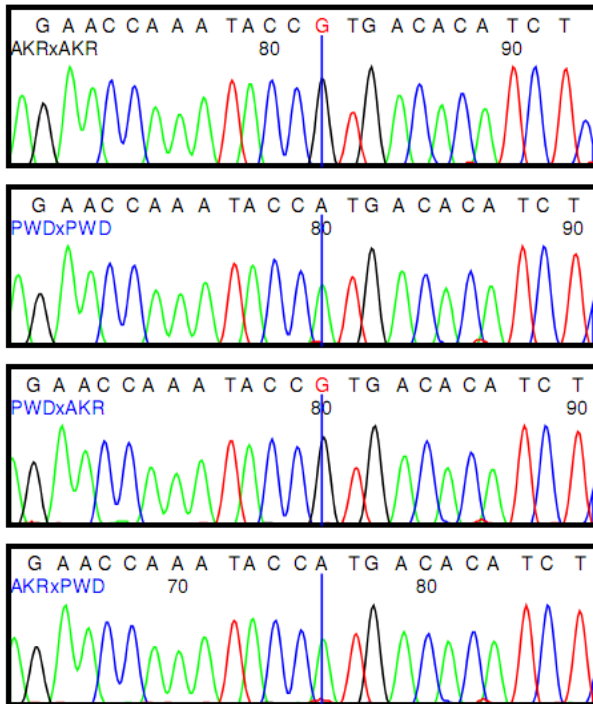

B. Pyrosequencing verification (NES10338539).

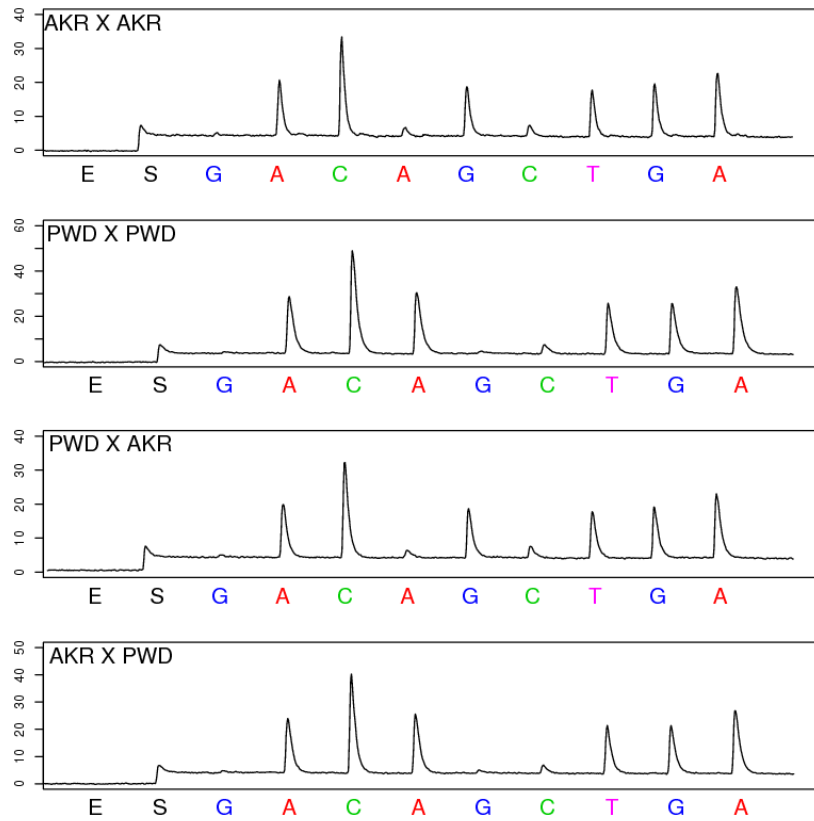

**Figure S1.7. Verification for known imprinted gene *Sgce*.** **A**, Sanger sequencing verification for Perlegen SNP NES10338539. The target sequence is ACC(G/A)TGACACA. **B**, Pyrosequencing sequencing verification for Perlegen SNP NES10338539. The target sequence is ACC(G/A)TGACACA.

**Figure S1.8. Pyrosequencing verification of *Nap115* (Novel SNP1).**

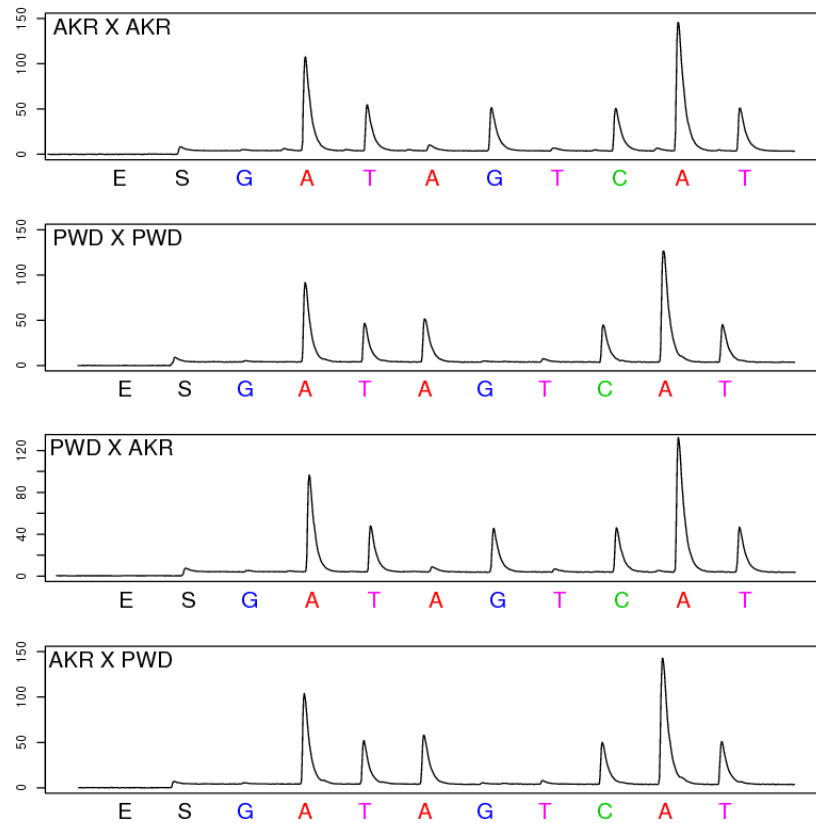

**Figure S1.8. Verification for known imprinted gene *Nap115*.** Pyrosequencing verification for novel SNP1 in *Nap115*. The target sequence is AAT(A/G)CAAATATTTA.

**Figure S1.9. Pyrosequencing verification of *Impact* (NES12698107).**

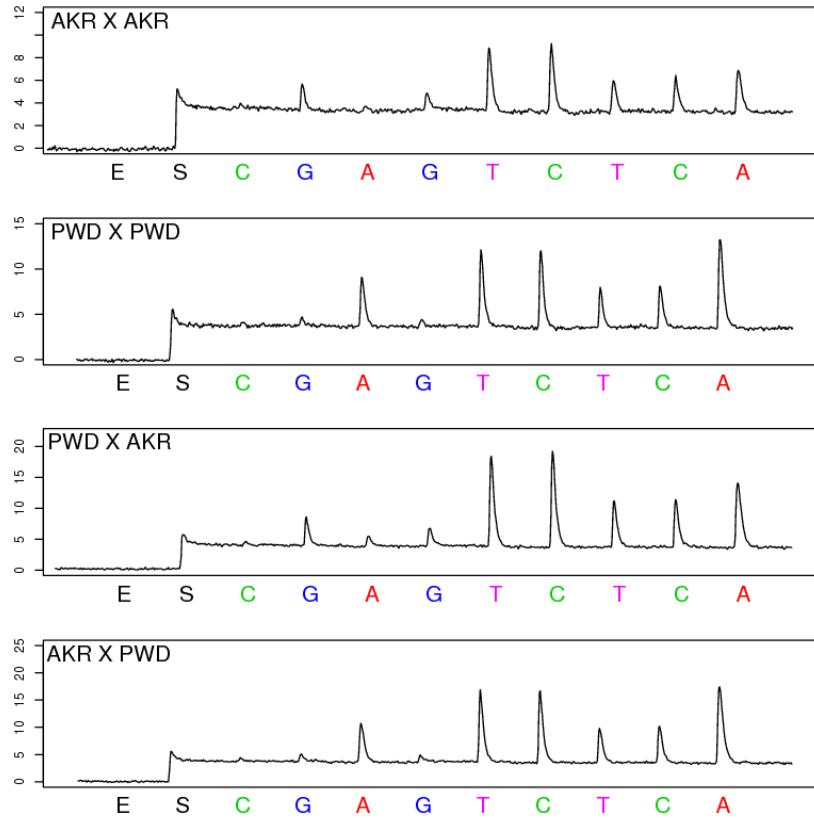

**Figure S1.9. Verification for known imprinted gene *Impact*.** Pyrosequencing sequencing verification for Perlegen SNP NES12698107. The target sequence is (G/A)TTCCTCAC.

**Figure S1.10. Pyrosequencing verification of *H19* and *Igf2*.**

A. Pyrosequencing verification of *H19* (Novel SNP1).

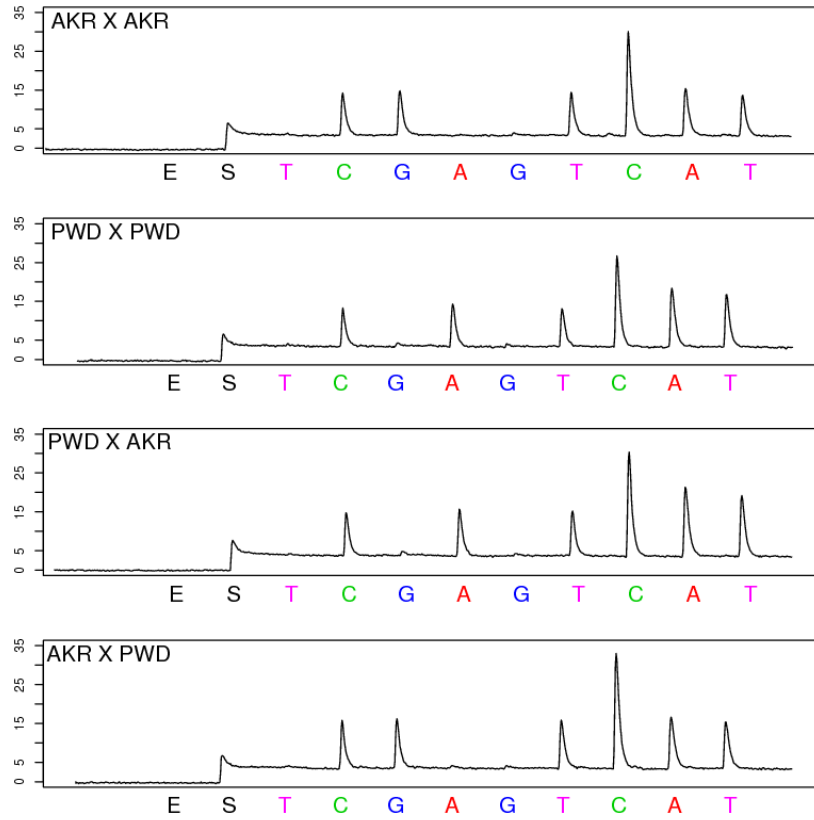

B. Pyrosequencing verification of *Igf2* (Novel SNP1).

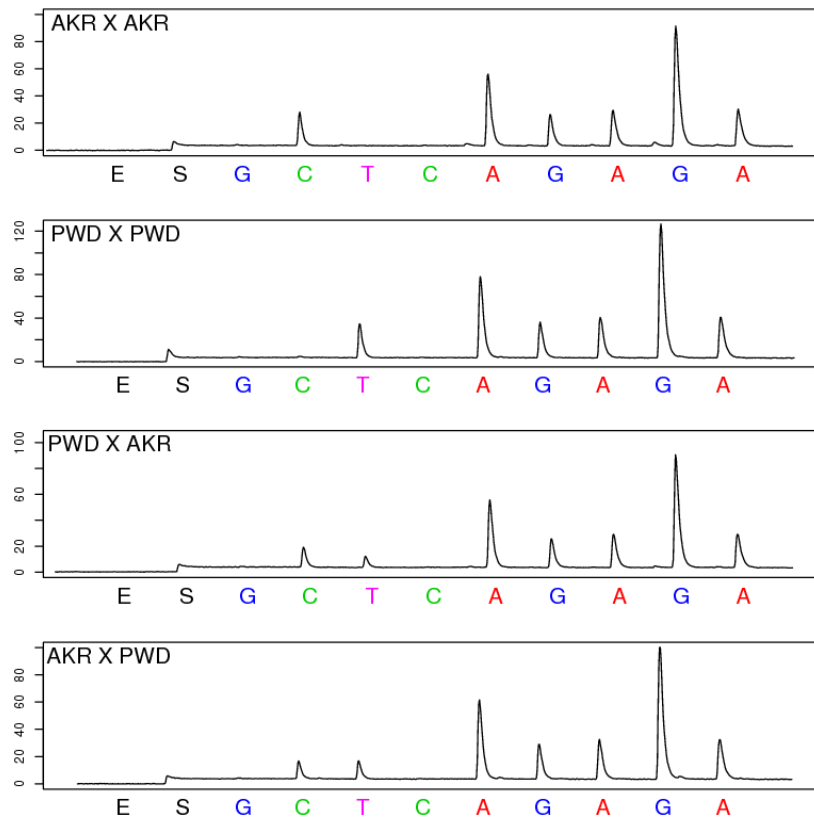

**Figure S1.10. Verification for known imprinted gene *H19* and *Igf2*.** **A,** Pyrosequencing sequencing verification for novel SNP1 in *H19*. The target sequence is C(G/A)TCCATC. **B,** Pyrosequencing sequencing verification for new SNP1 in *Igf2*. The target sequence is (C/T)AAGAGGGGAT.



**Figure S1.11. Pyrosequencing verification of *Cdkn1c* (Novel SNP1).**

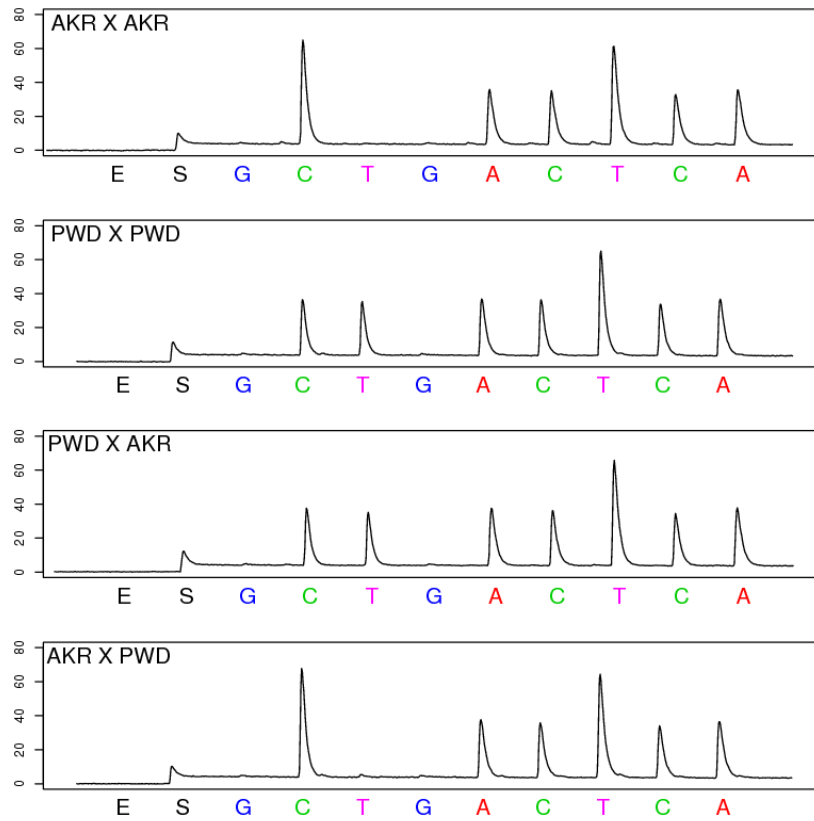

**Figure S1.11. Verification for known imprinted gene *Cdkn1c*.** Pyrosequencing sequencing verification for novel SNP1 in *Cdkn1c*. The target sequence is C(C/T)ACTTCAT .

**Figure S1.12. Verification for novel imprinted gene *1810044A24Rik*.**

A. Sanger sequencing verification (NES12099717).

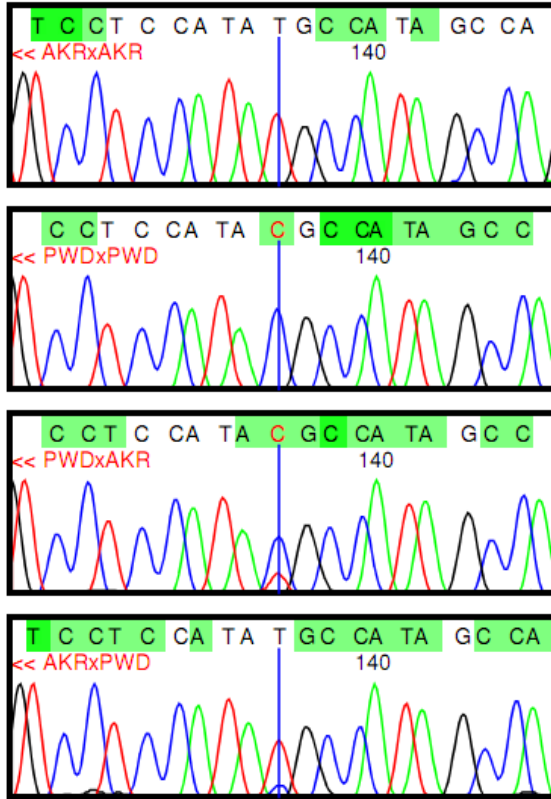

B. Pyrosequencing verification in AKR and PWD reciprocal cross (NES12097854).

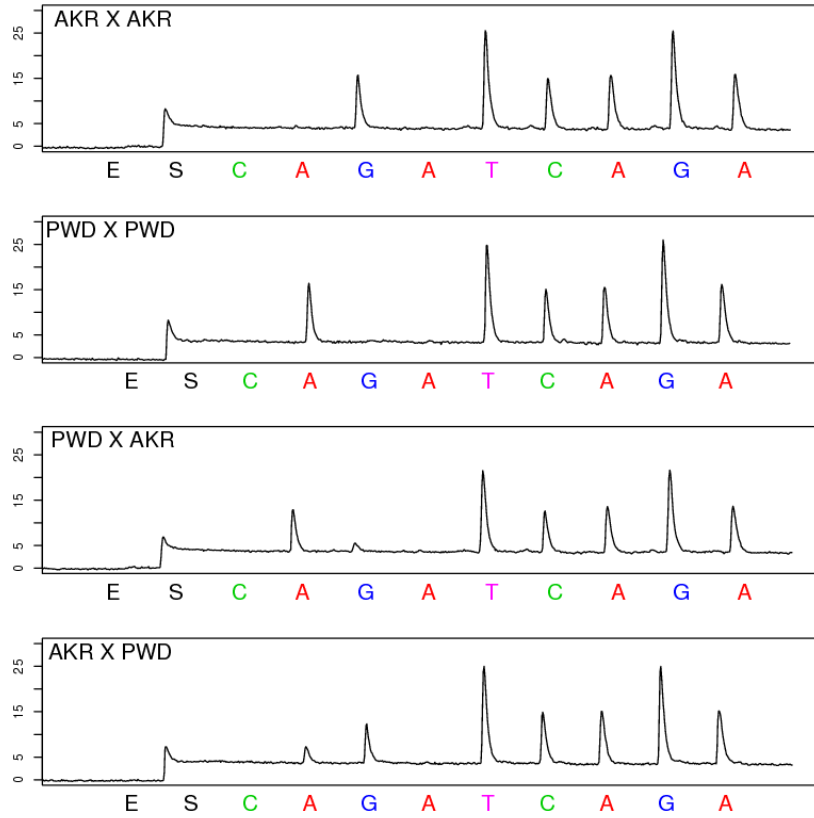

C. Pyrosequencing verification in C3H and B6 reciprocal cross (NES12098495).

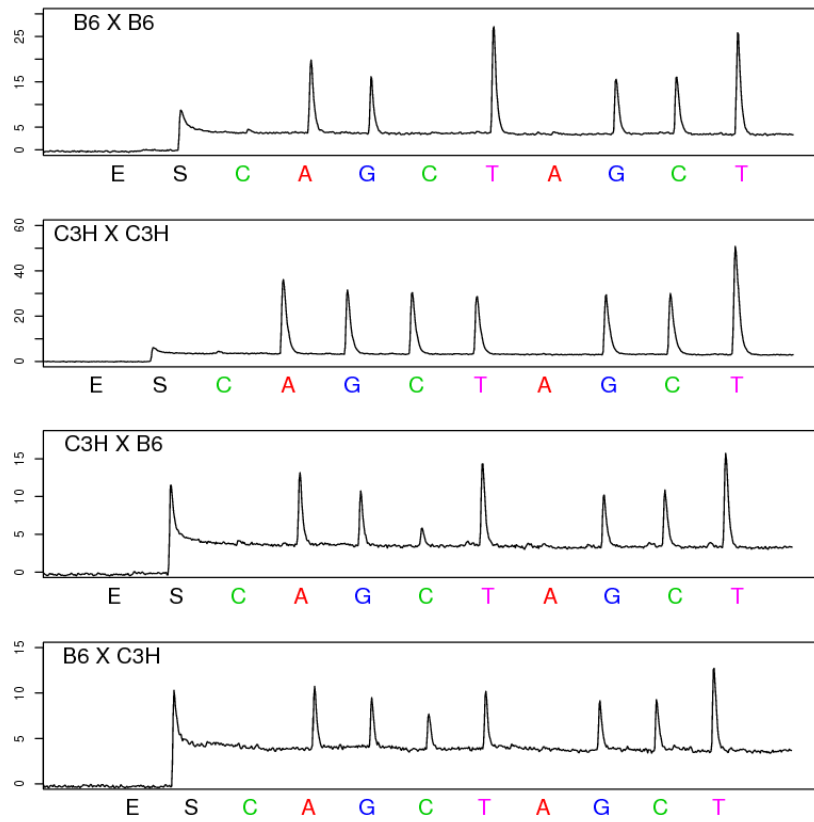

**Figure S1.12. Verification for known imprinted gene *1810044A24Rik*.** **A**, Sanger sequencing verification for Perlegen SNP NES12099717. The target sequence is TCCATA(T/C)GCCATA. **B**, Pyrosequencing sequencing verification for Perlegen SNP NES12097854 in AKR and PWD reciprocal cross. The target sequence is (A/G)TTCAGGA. **C**, Pyrosequencing sequencing verification for Perlegen SNP NES12098495 in C3H and B6 reciprocal cross. The target sequence is AG(C/T)TGCTT.

**Figure S1.13. Verification for novel imprinted gene *Blcap*.**

A. Pyrosequencing verification (NES08901938).

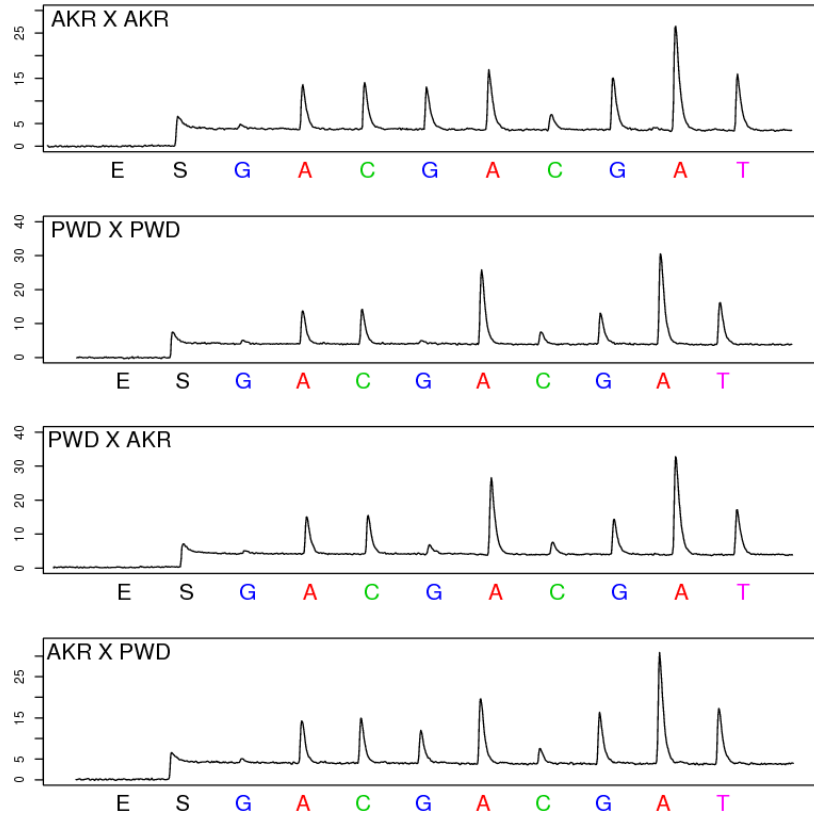

B. Pyrosequencing verification (NES08901938, using different PCR and Pyrosequencing primers).

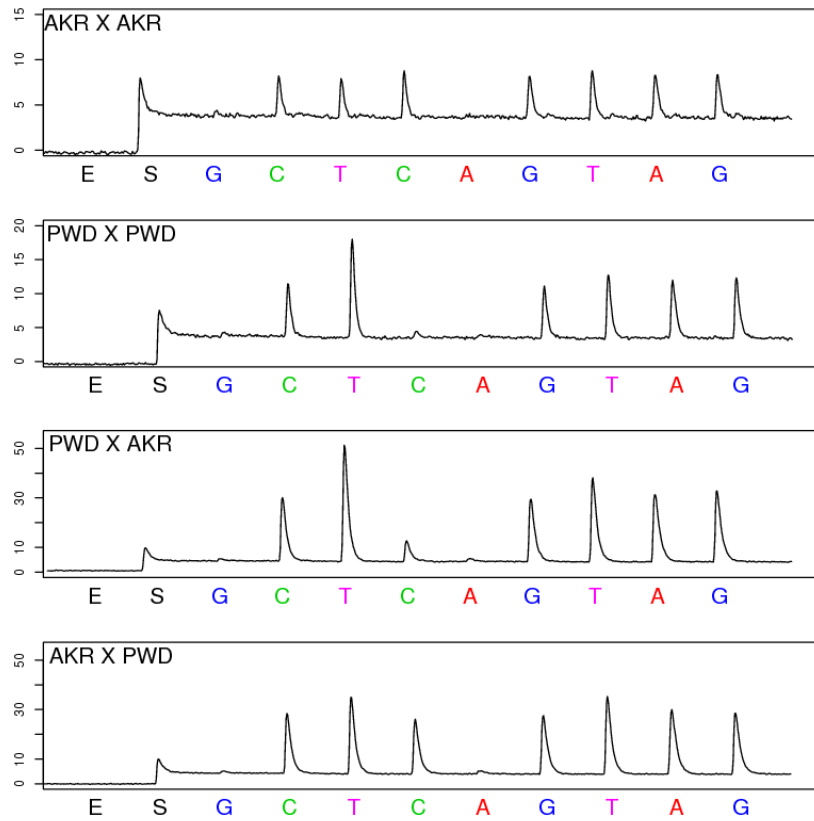

**Figure S1.13. Verification for known imprinted gene *Blcap*.** A, Pyrosequencing sequencing verification for Perlegen SNP. The target sequence is AC(A/G)AGAATA. B, Pyrosequencing sequencing verification for Perlegen SNP NES12098495. The target sequence is CT(C/T)GTAGA.

Figure S1.14.. Genome-wide plot of imprinting status.

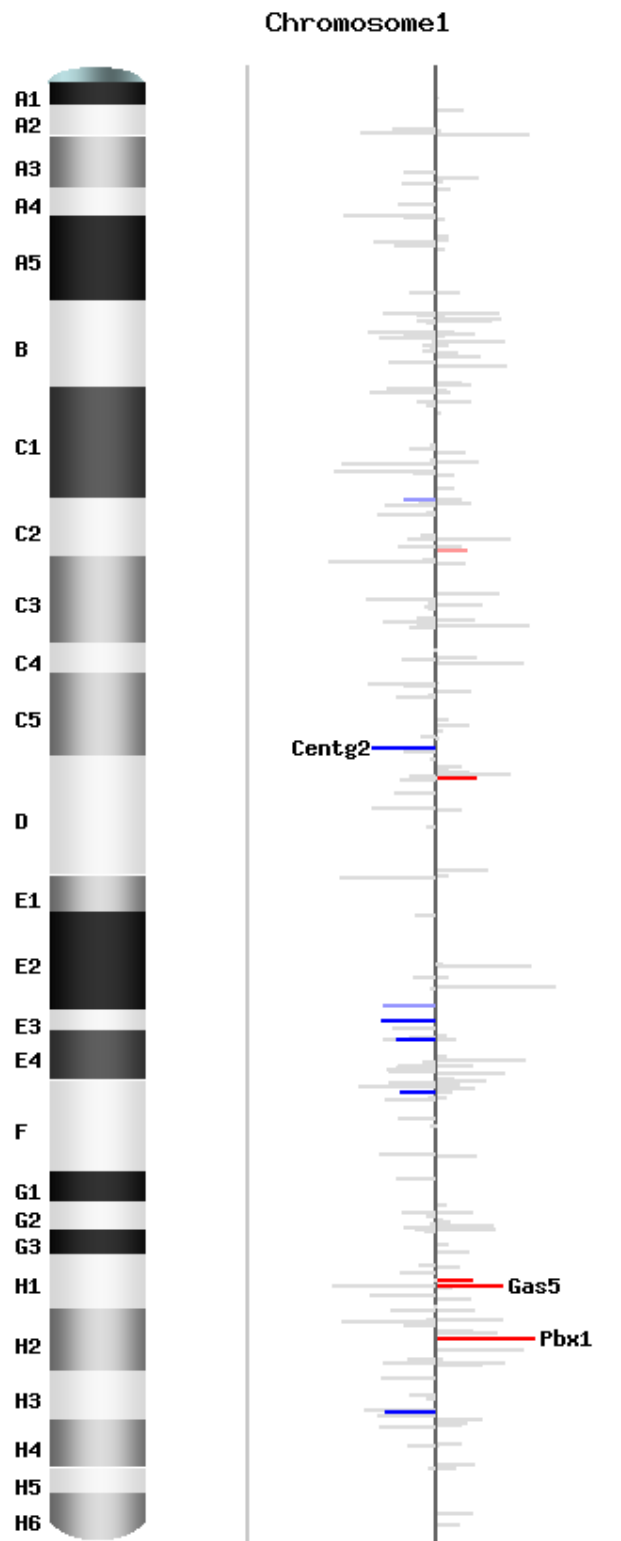



Chromosome2

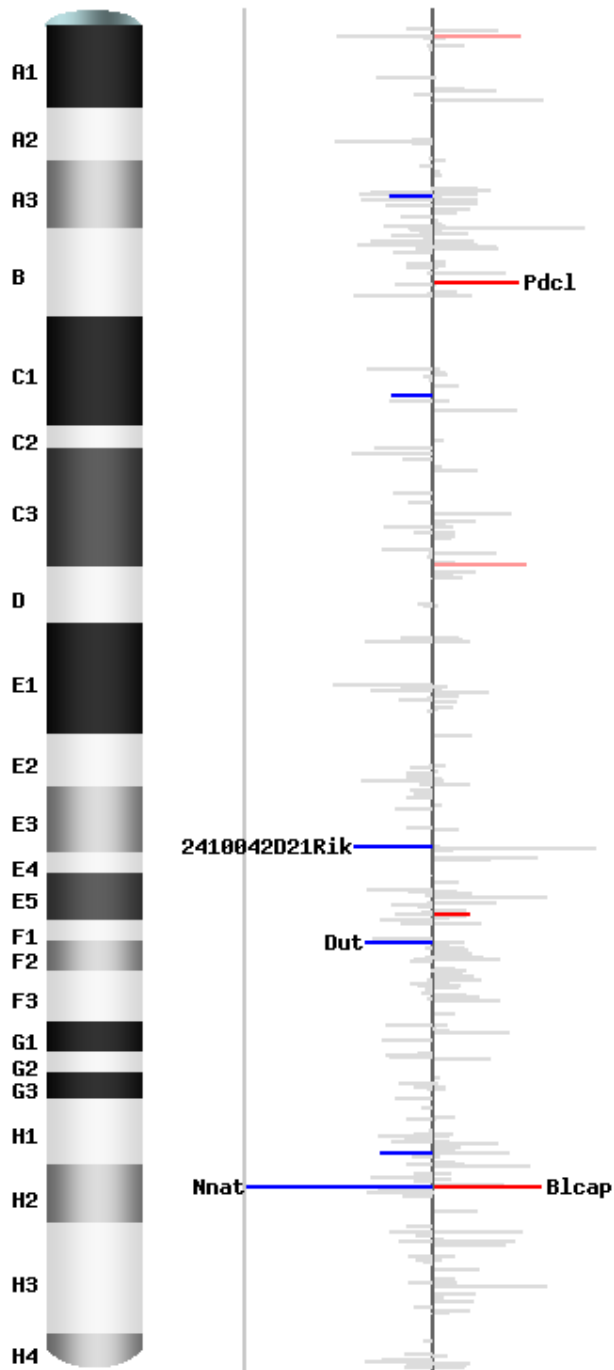

Chromosome3

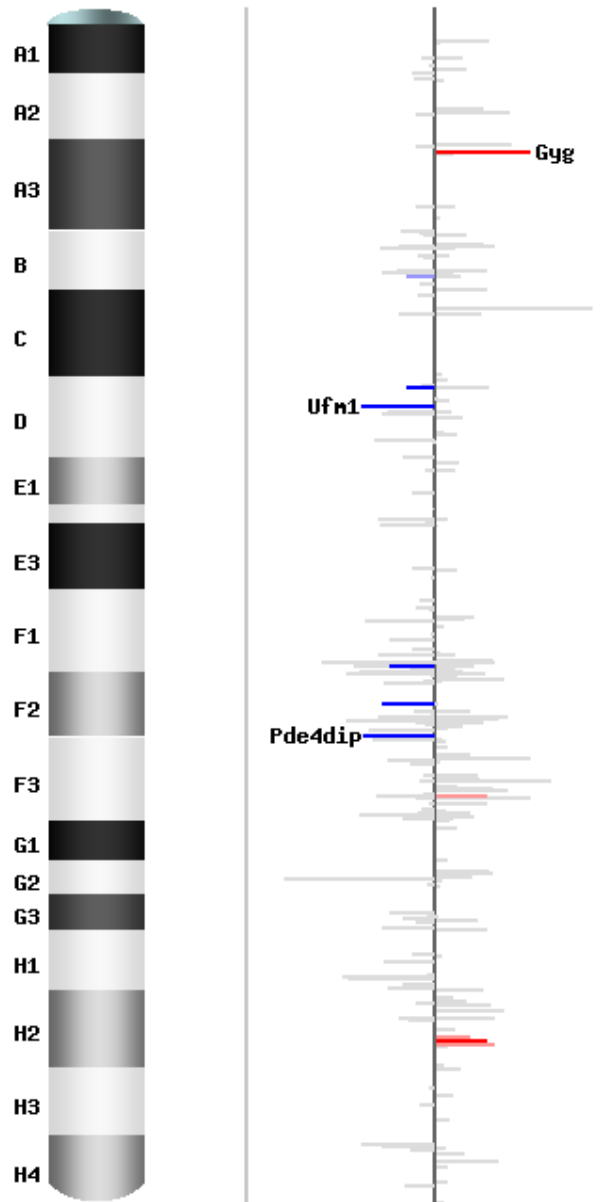

Chromosome4

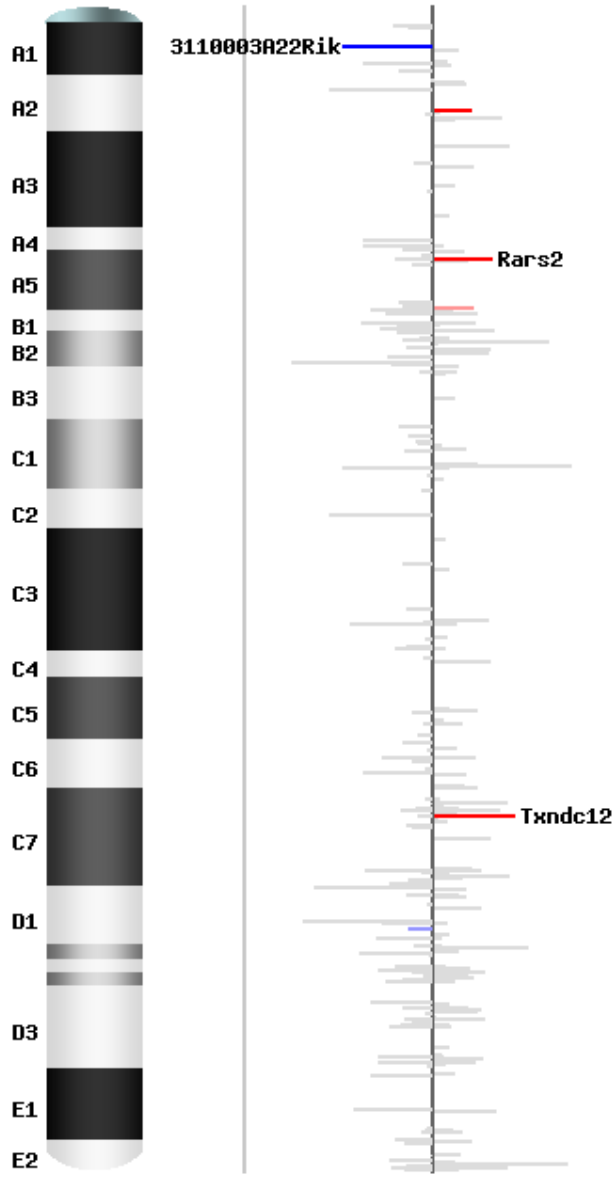

Chromosome5

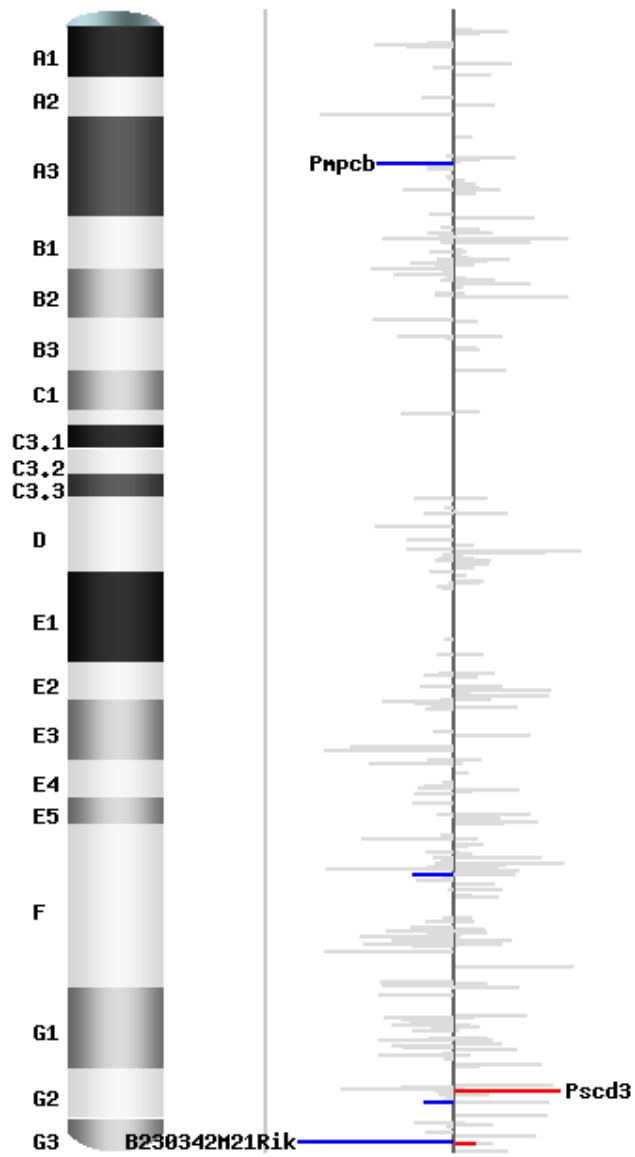

Chromosome6

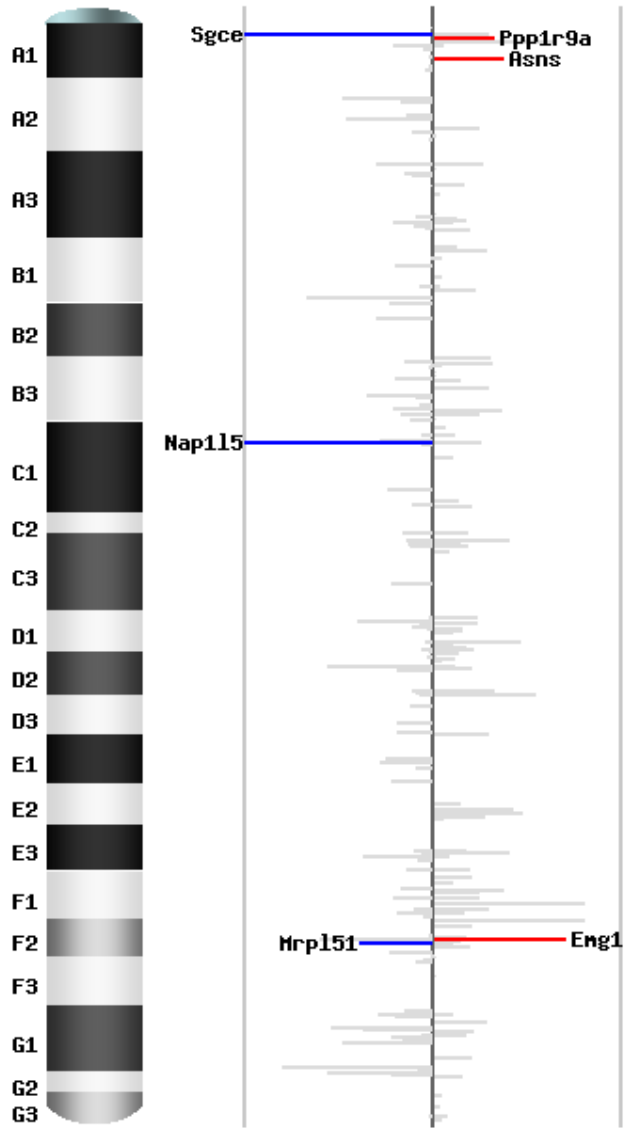

Chromosome7

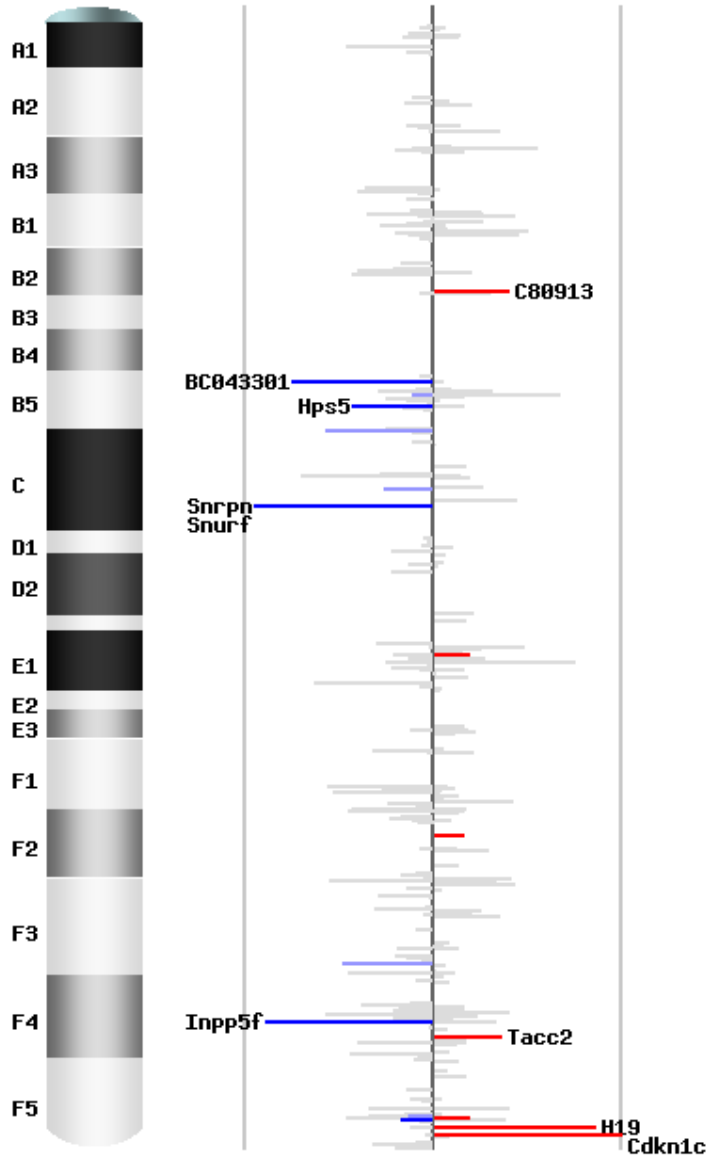

# Chromosome8

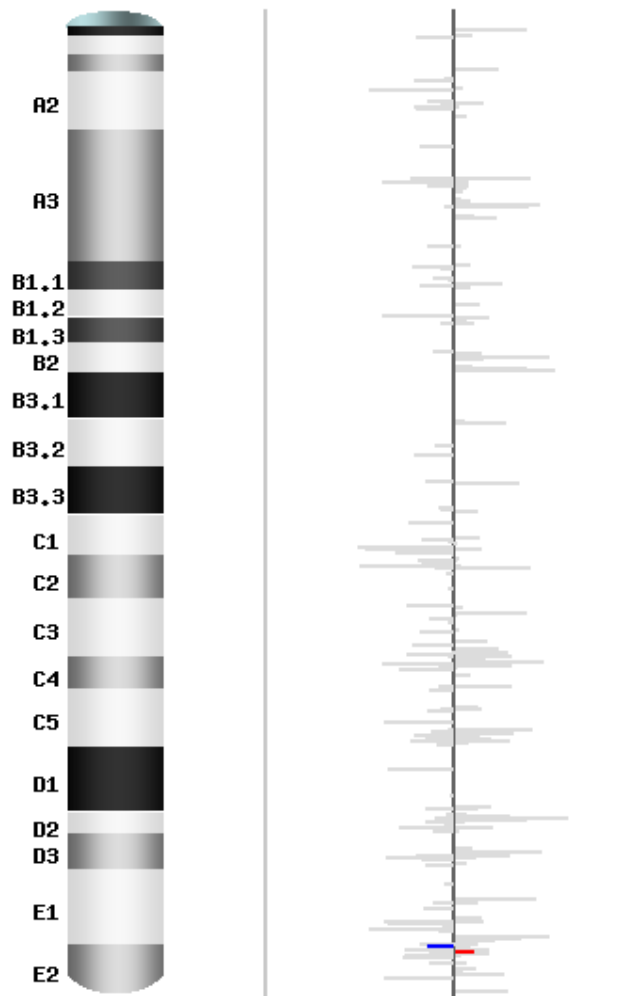

Chromosome9

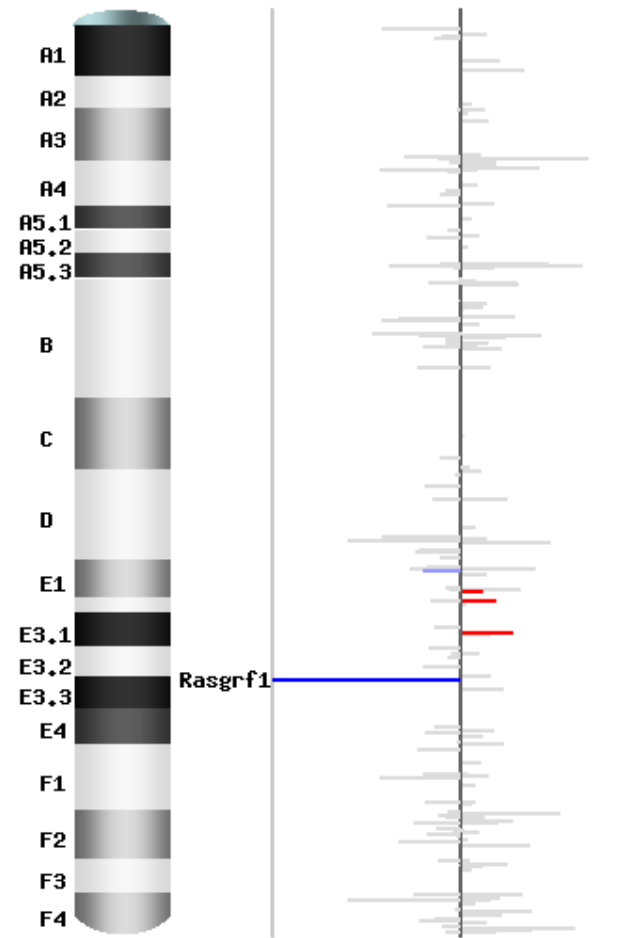



Chromosome10

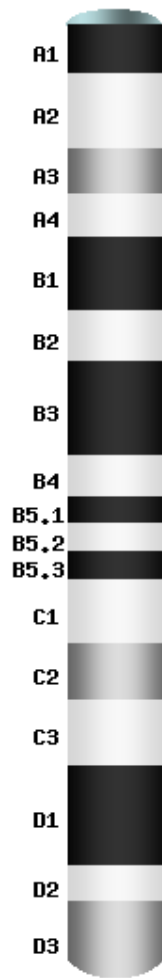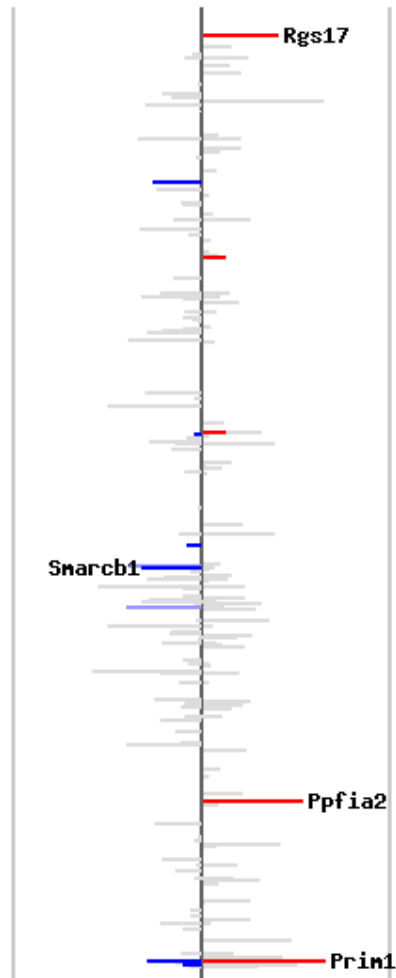

# Chromosome11

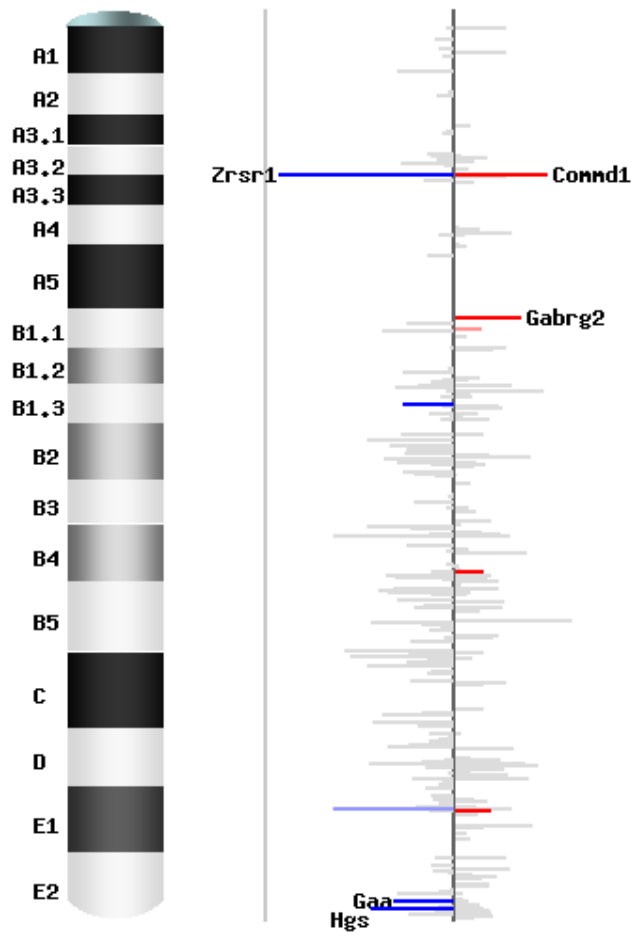

# Chromosome12

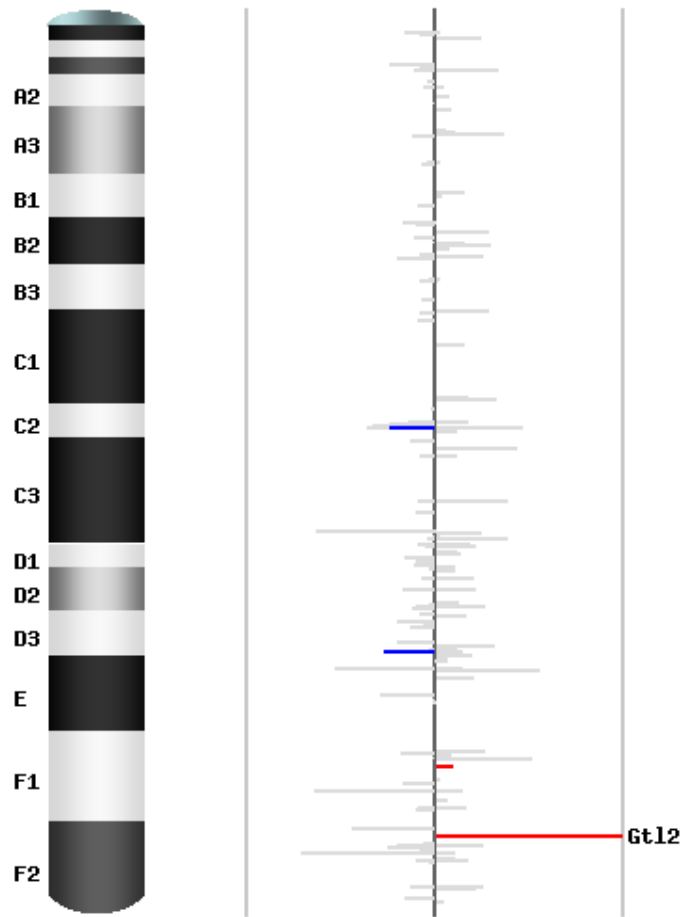

# Chromosome13

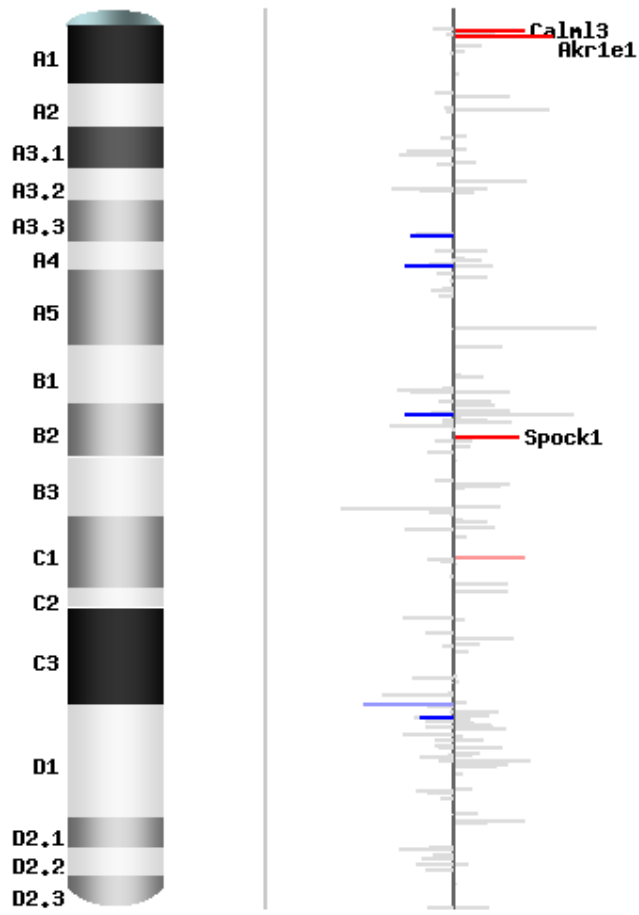

# Chromosome14

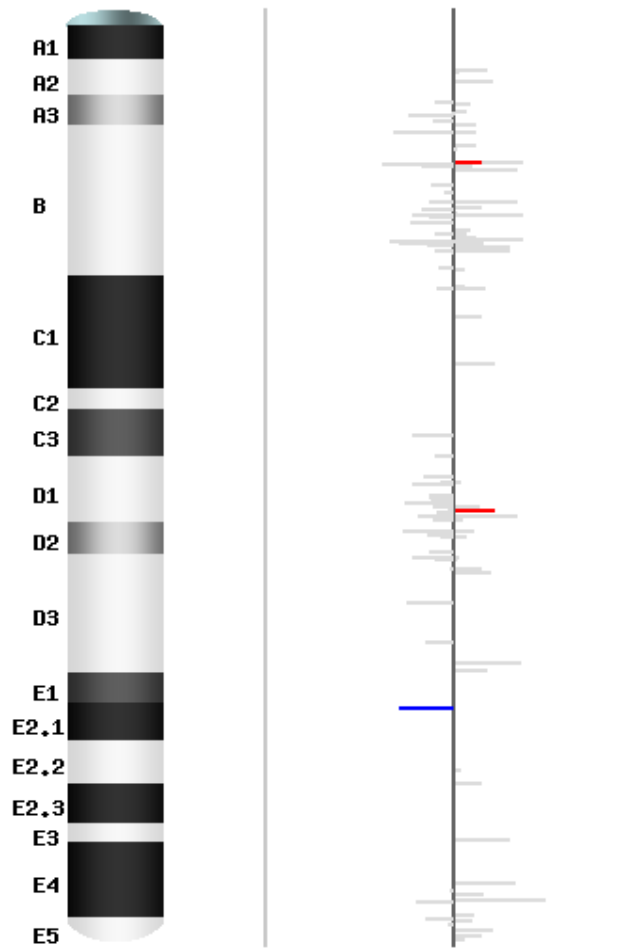

# Chromosome15

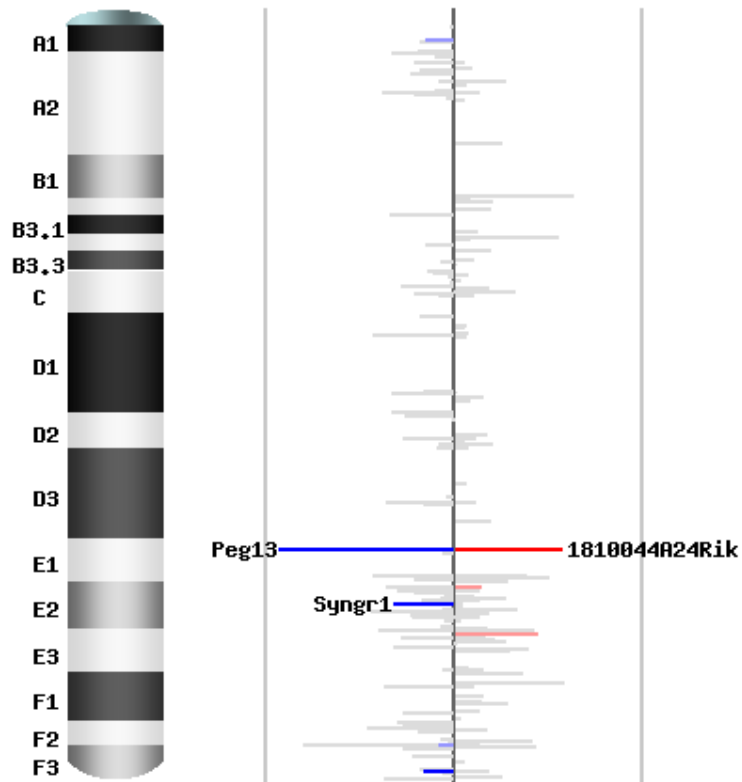

# Chromosome16

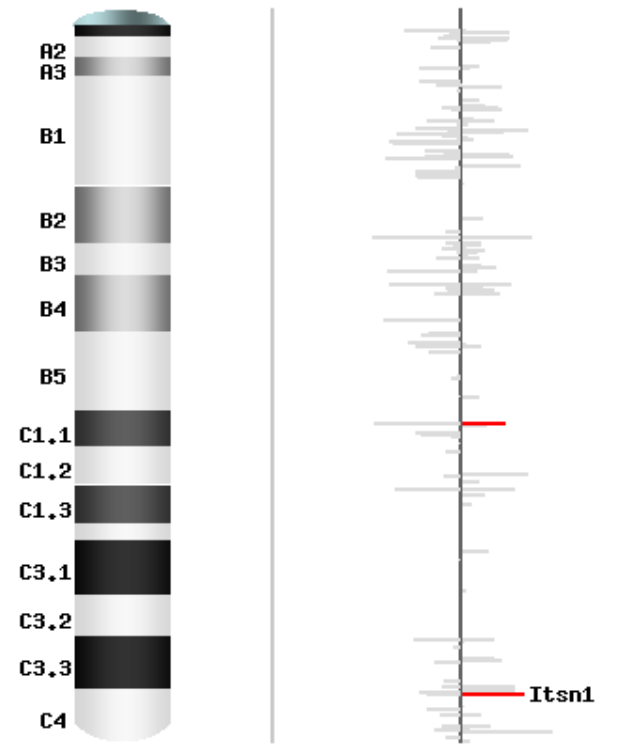

# Chromosome17

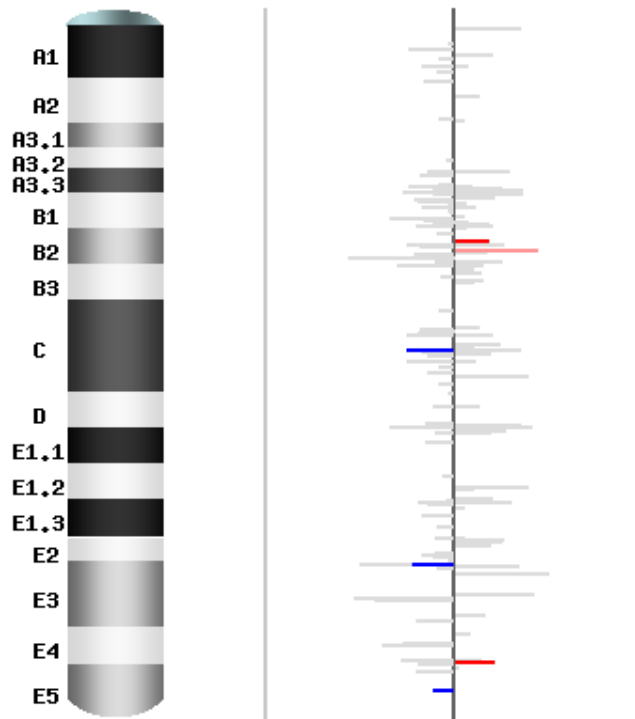



# Chromosome18

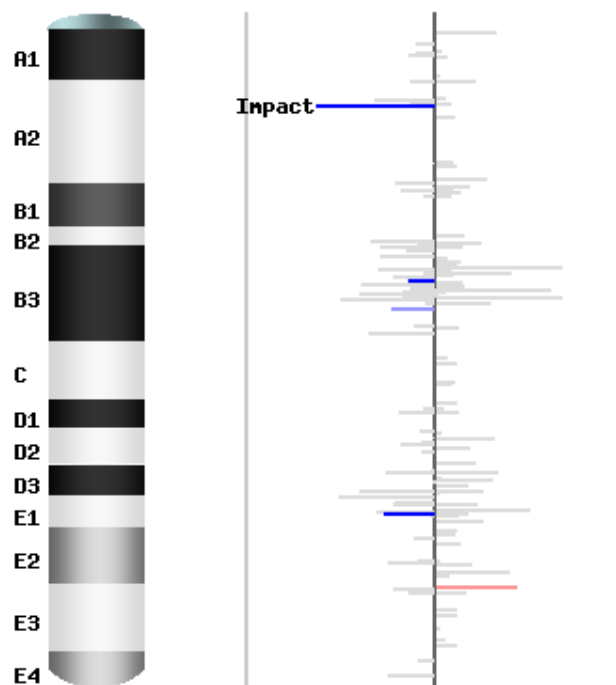

# Chromosome19

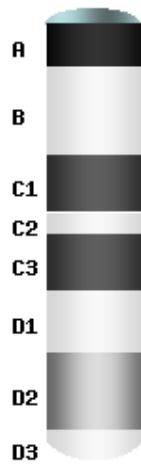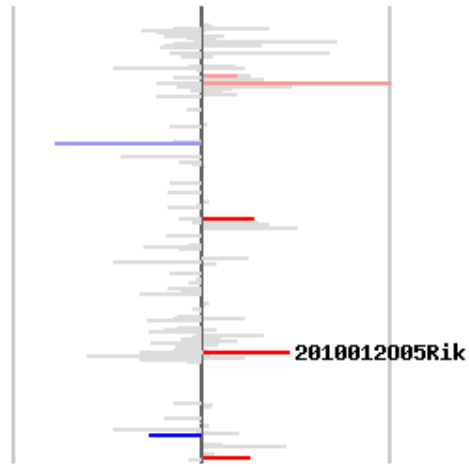

**Figure S1.14. Genome-wide plot of imprinting status.** The plots contain 5,076 unique Entrez genes covered by Solexa with counts no less than 4 in both reciprocal crosses. The heights of the bar is the difference of the AKR percentage in the two reciprocal crosses ( $p_1 - p_2$ ), representing the intensity of imprinting. The color stands for the direction of imprinting, blue for paternal and red for maternal. The intensity of the color represent the significance, grey for not significant ( $q\text{-value} \geq 0.10$ ), lighter blue and red for marginally significant ( $0.05 \leq q\text{-value} < 0.10$ ), darker blue and red for significant ( $q\text{-value} < 0.05$ ). The gene name is shown if  $|p_1 - p_2| \geq 0.3$ .

**Figure S1.15. Distribution of number of Perlegen SNPs per RefSeq genes.**

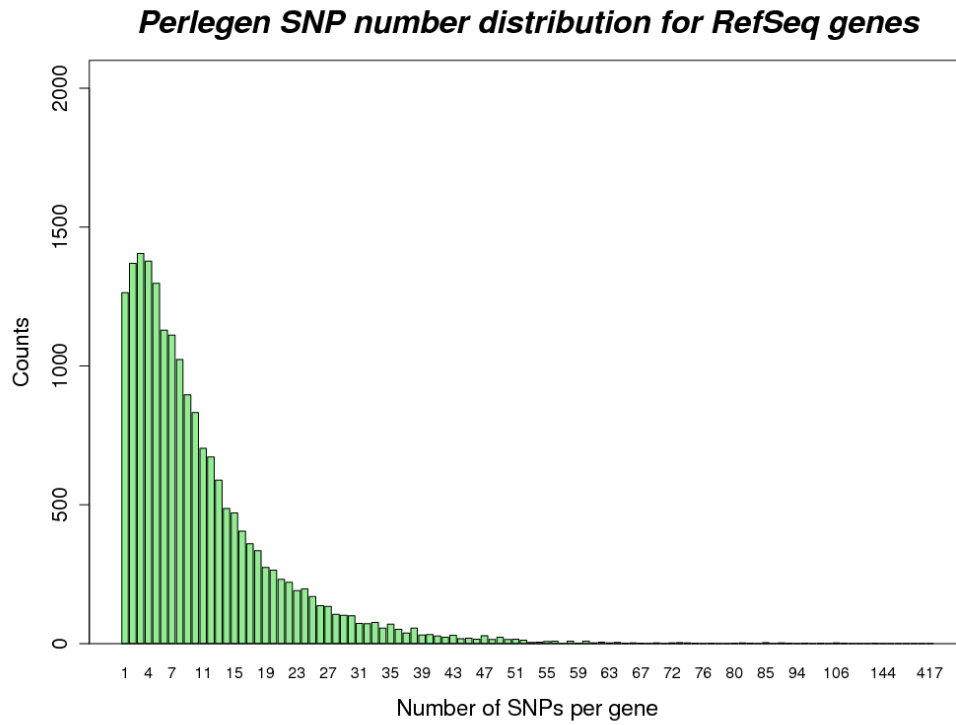

**Figure S1.15. Distribution of number of Perlegen SNPs per RefSeq genes.**

**Figure S1.16. The quality score distribution of the Solexa SNPs.**

A 1). Quality score of Solexa SNPs of lane 1, PWD x AKR, by SNP class.

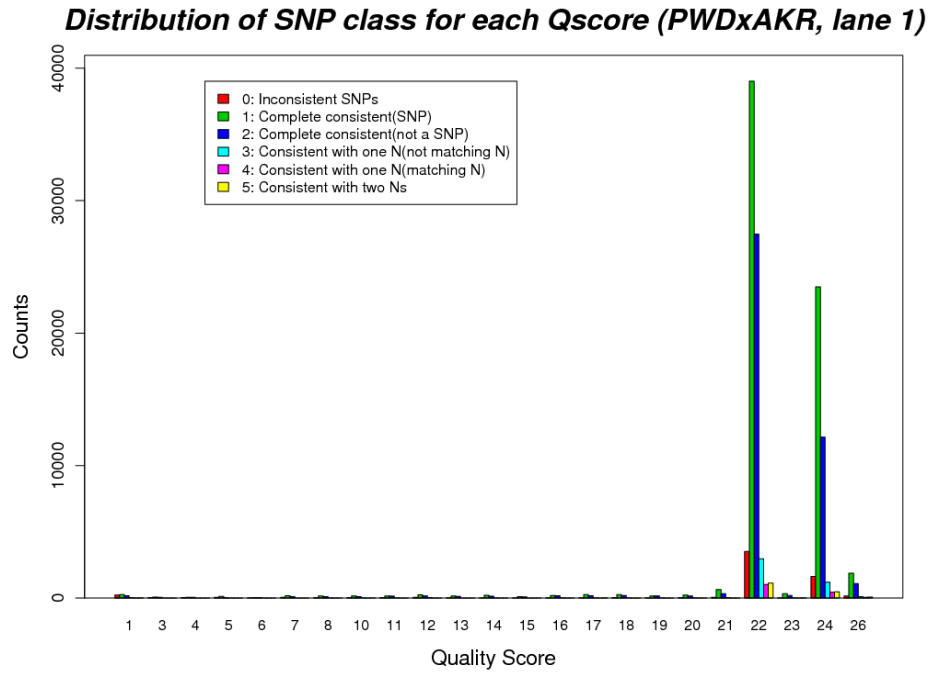

A 2). Quality score of Solexa SNPs of lane 2, PWD x AKR, by SNP class.

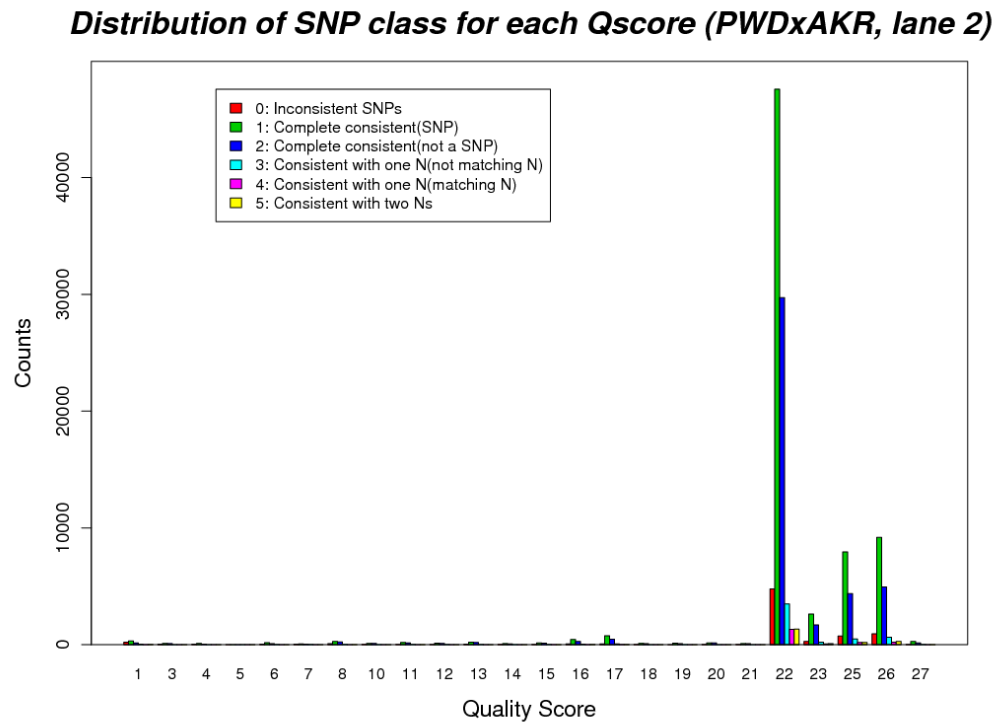

A 3). Quality score of Solexa SNPs of lane 3, PWD x AKR, by SNP class.

**Distribution of SNP class for each Qscore (PWDxAKR, lane 3)**

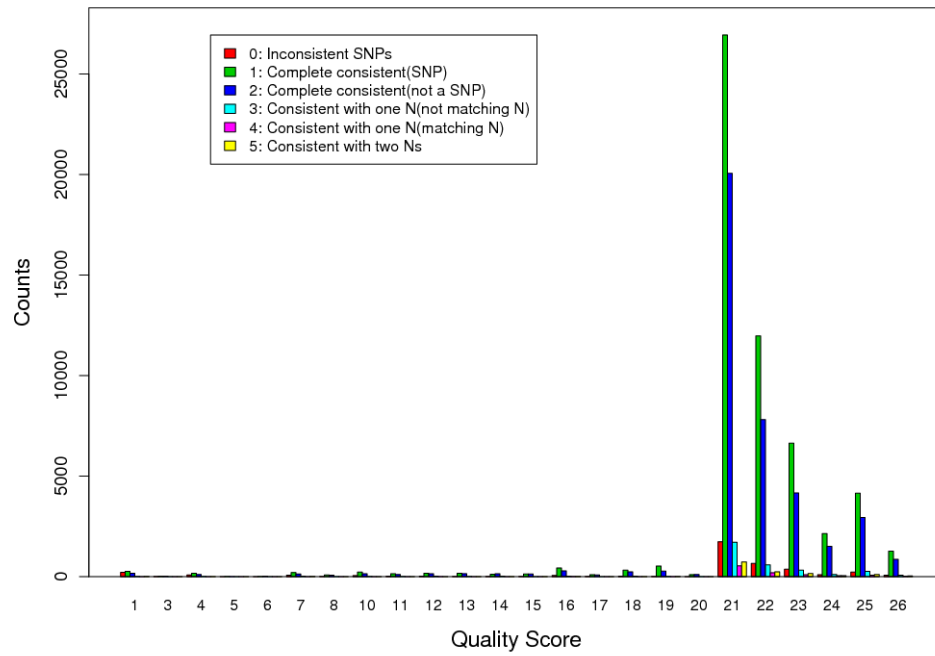

A 4). Quality score of Solexa SNPs of lane 4, PWD x AKR, by SNP class.

**Distribution of SNP class for each Qscore (PWDxAKR, lane 4)**

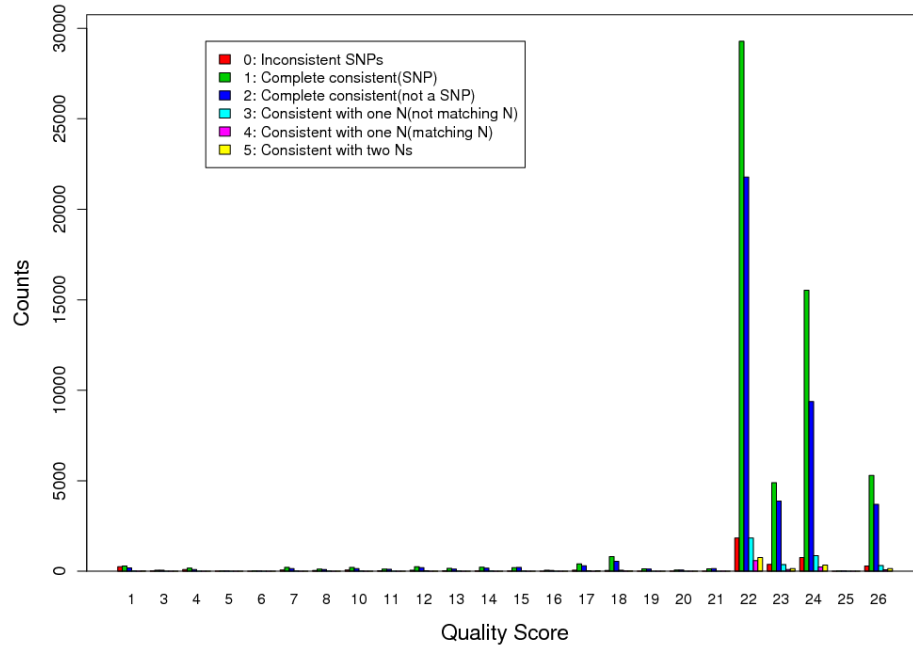

A 5). Quality score of Solexa SNPs of lane 6, PWD x AKR, by SNP class.

**Distribution of SNP class for each Qscore (PWDxAKR, lane 6)**

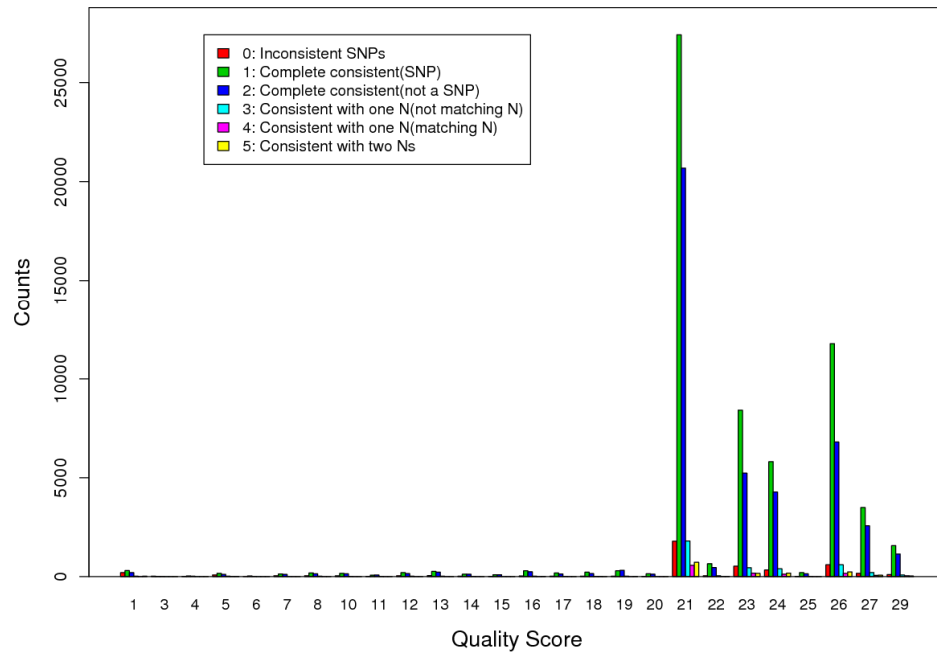

A 6). Quality score of Solexa SNPs of lane 7, PWD x AKR, by SNP class.

**Distribution of SNP class for each Qscore (PWDxAKR, lane 7)**

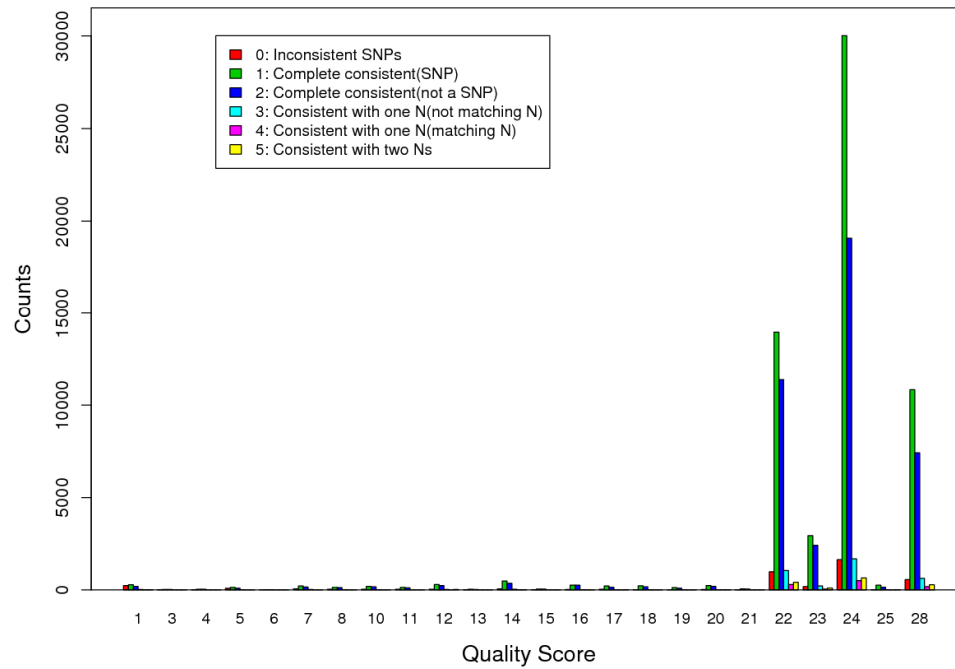

A 7). Quality score of Solexa SNPs of lane 8, PWD x AKR, by SNP class.

**Distribution of SNP class for each Qscore (PWDxAKR, lane 8)**

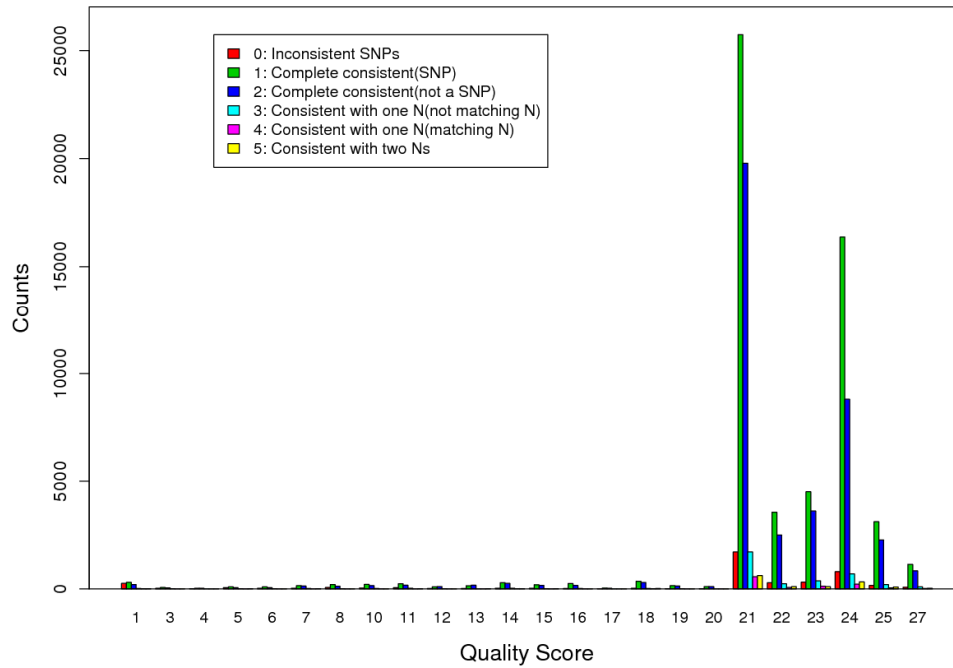

B 1). Quality score of Solexa SNPs of lane 1, AKR x PWD, by SNP class.

**Distribution of SNP class for each Qscore (AKRxPWD, lane 1)**

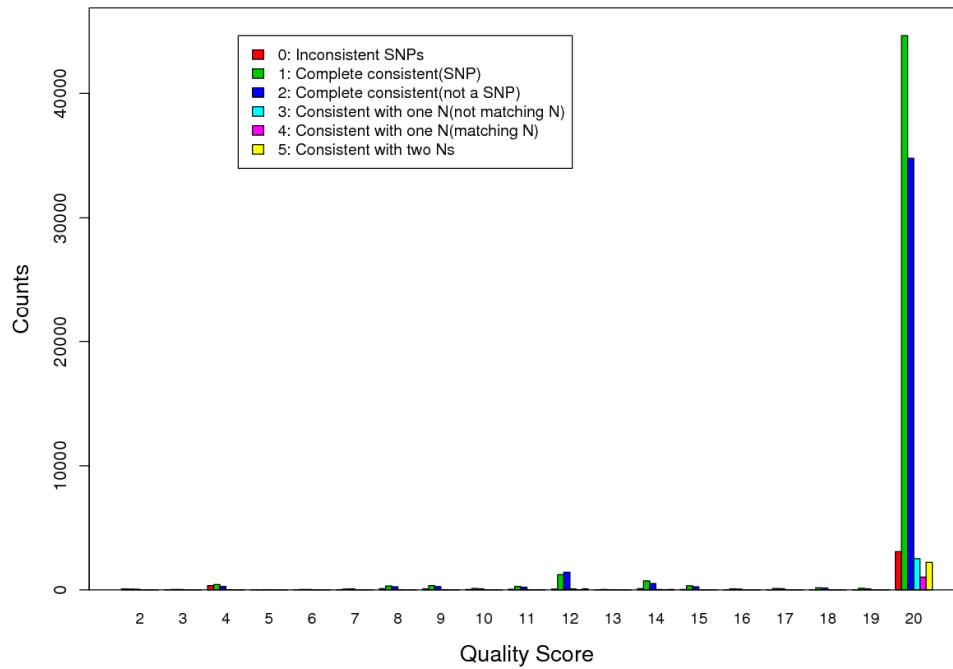



B 2). Quality score of Solexa SNPs of lane 2, AKR x PWD, by SNP class.

***Distribution of SNP class for each Qscore (AKRxPWD, lane 2)***

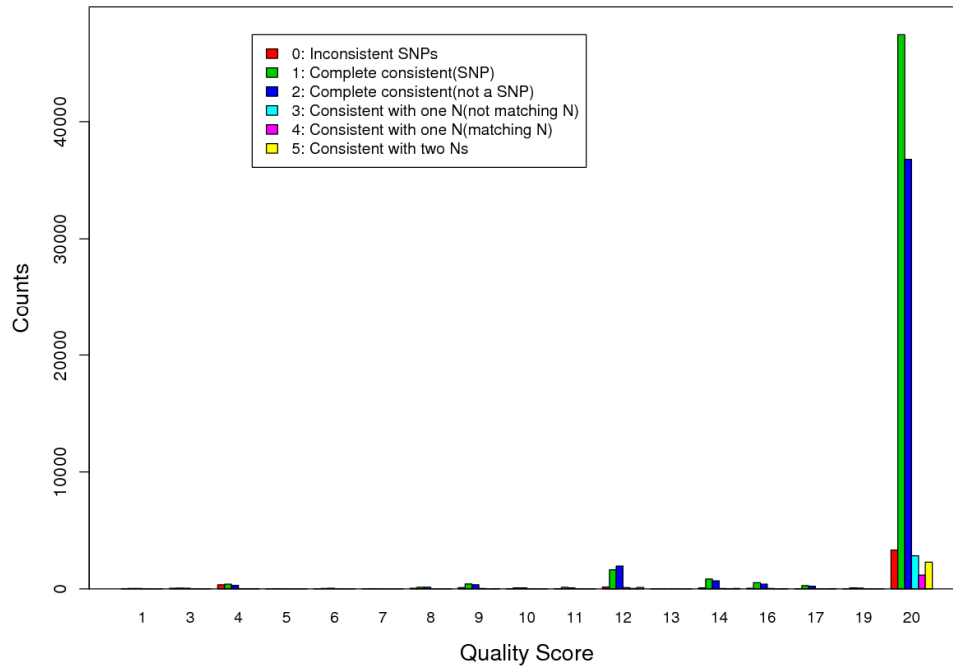

B 3). Quality score of Solexa SNPs of lane 3, AKR x PWD, by SNP class.

***Distribution of SNP class for each Qscore (AKRxPWD, lane 3)***

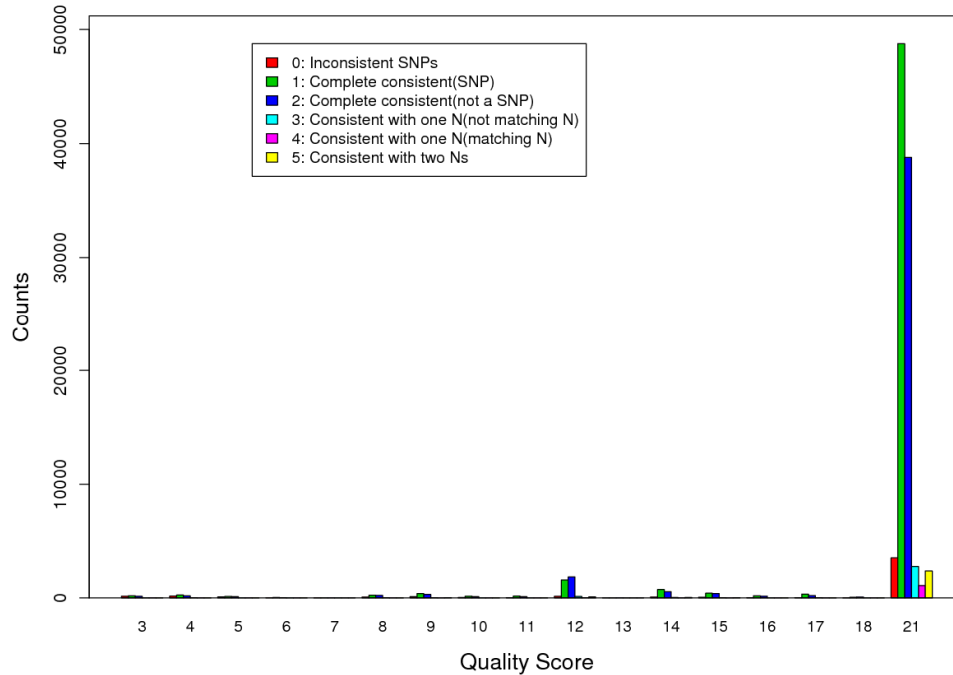

B 4). Quality score of Solexa SNPs of lane 4, AKR x PWD, by SNP class.

**Distribution of SNP class for each Qscore (AKRxPWD, lane 4)**

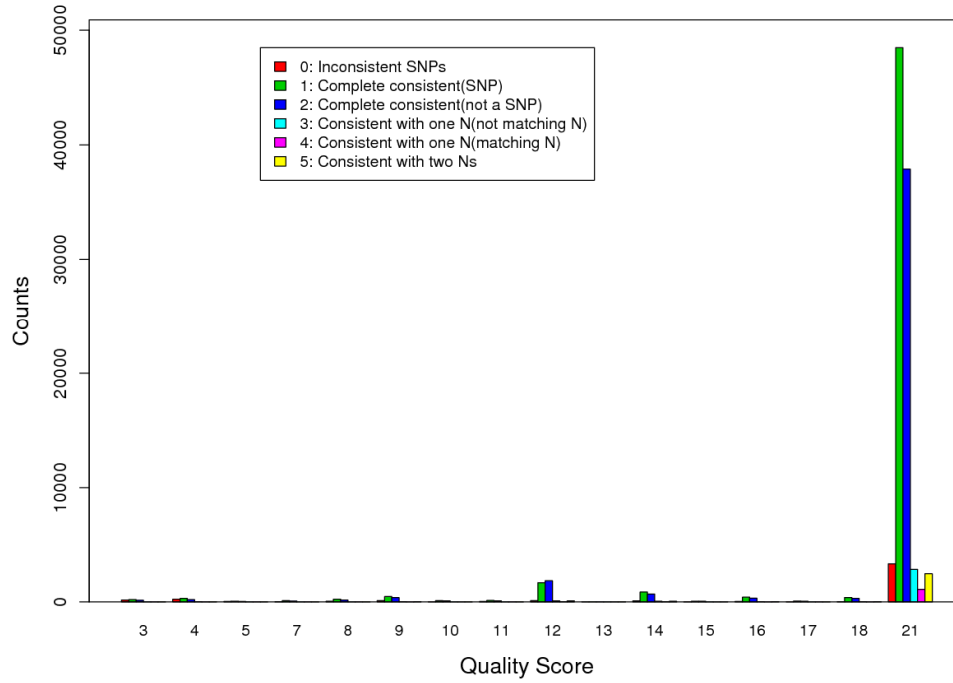

B 5). Quality score of Solexa SNPs of lane 5, AKR x PWD, by SNP class.

**Distribution of SNP class for each Qscore (AKRxPWD, lane 5)**

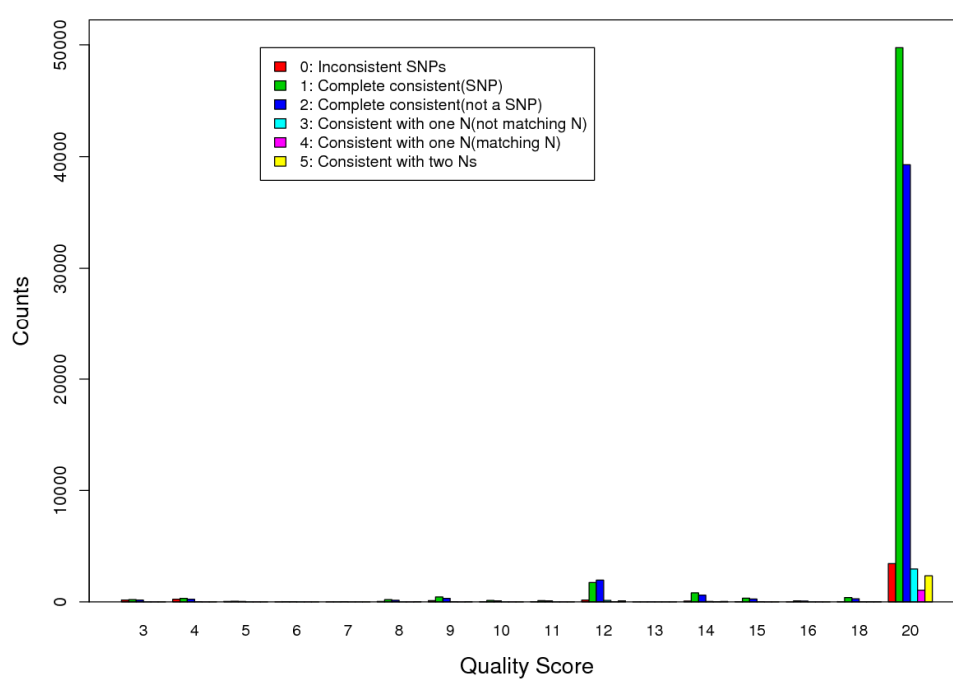

B 6). Quality score of Solexa SNPs of lane 6, AKR x PWD, by SNP class.

**Distribution of SNP class for each Qscore (AKRxPWD, lane 6)**

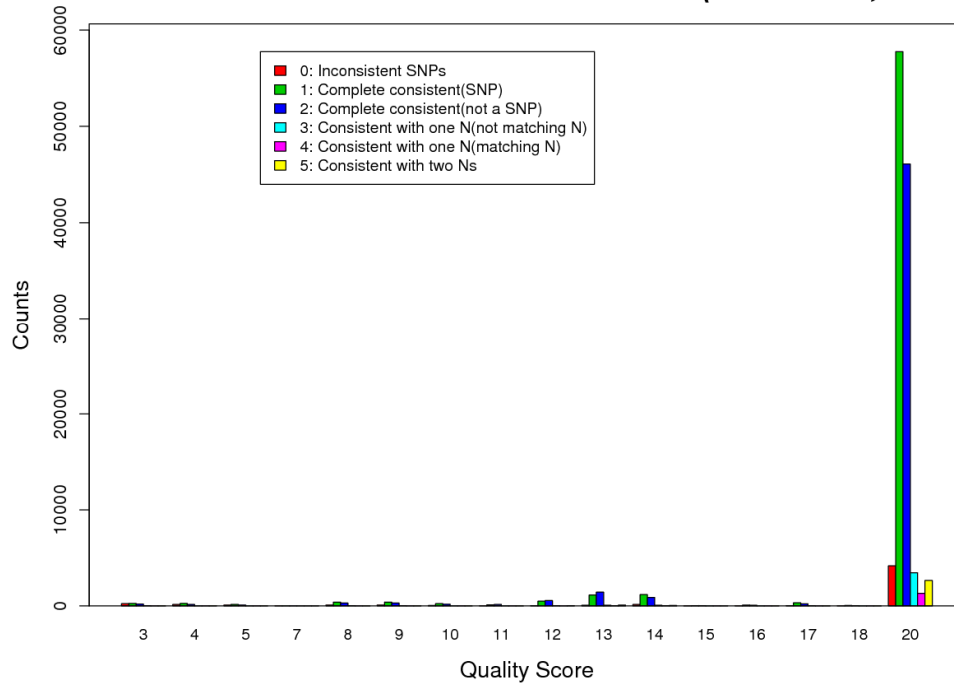

B 7). Quality score of Solexa SNPs of lane 7, AKR x PWD, by SNP class.

**Distribution of SNP class for each Qscore (AKRxPWD, lane 7)**

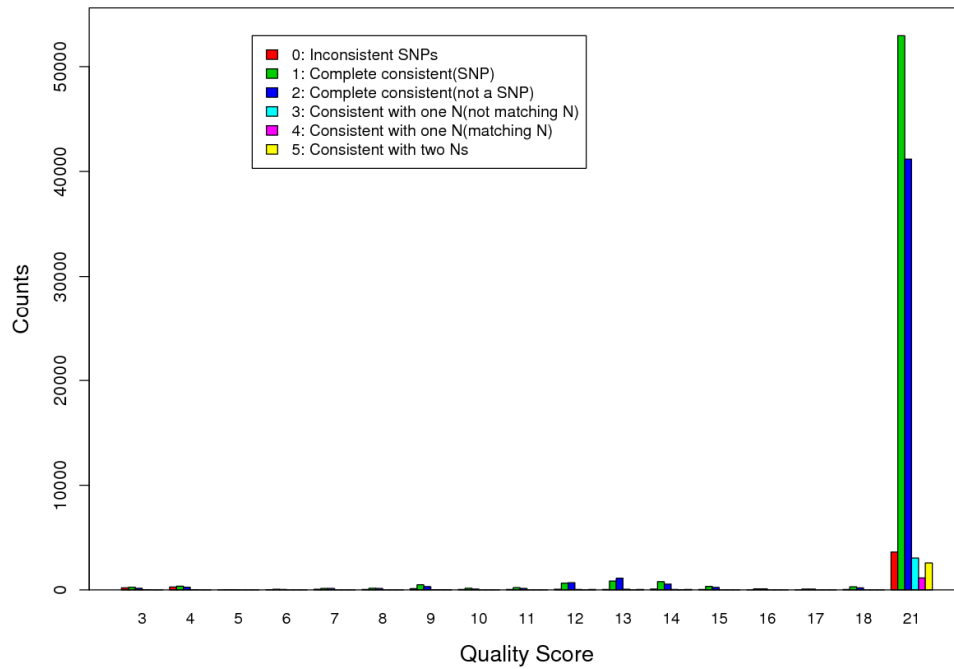

B 8). Quality score of Solexa SNPs of lane 8, AKR x PWD, by SNP class.

***Distribution of SNP class for each Qscore (AKRxPWD, lane 8)***

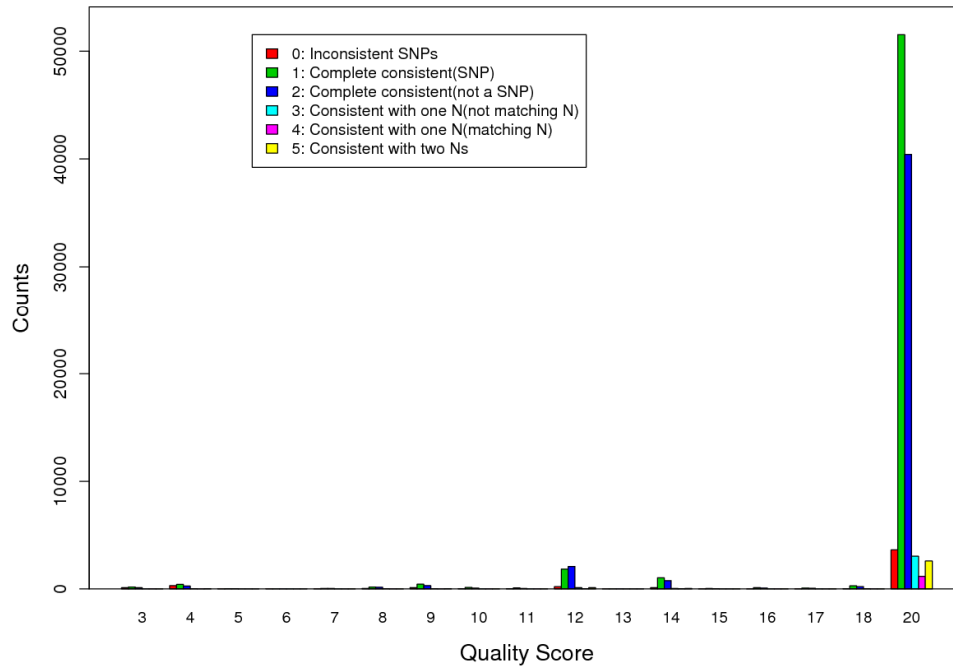

**Figure S1.16. The quality score distribution of the Solexa SNPs. A,** Quality score distribution for the seven lanes in the Solexa run of the PWD x AKR sample. **B,** Quality score distribution for the eight lanes in the Solexa run of the AKR x PWD sample.

**Figure S1.17. The distribution of number of mismatches in the SNP-containing Solexa reads.**

A 1). Mismatch score distribution of Solexa SNPs of lane 1, PWD x AKR, by SNP class.

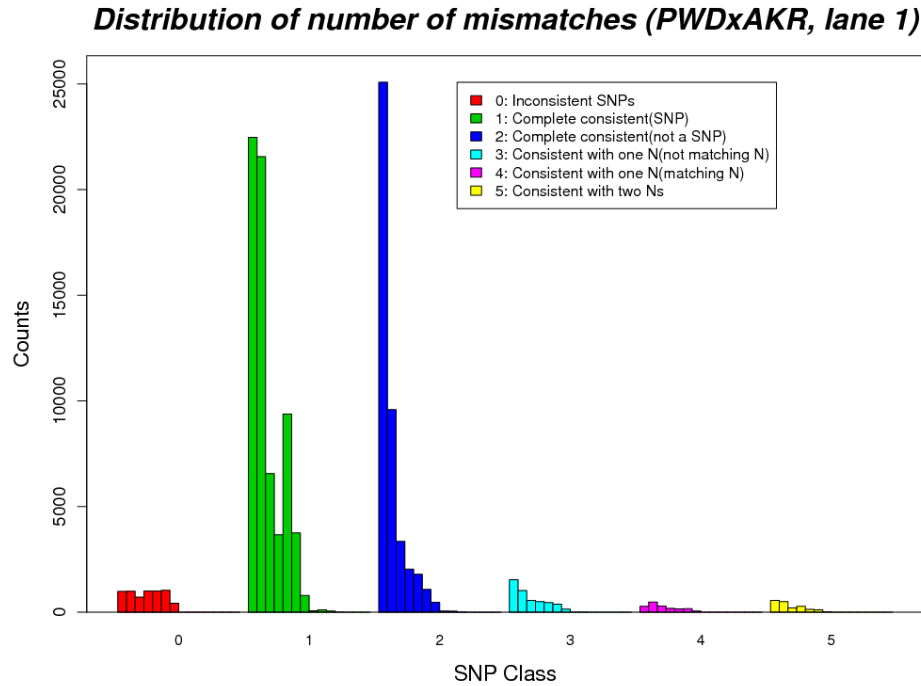

A 2). Mismatch score distribution of Solexa SNPs of lane 2, PWD x AKR, by SNP class.

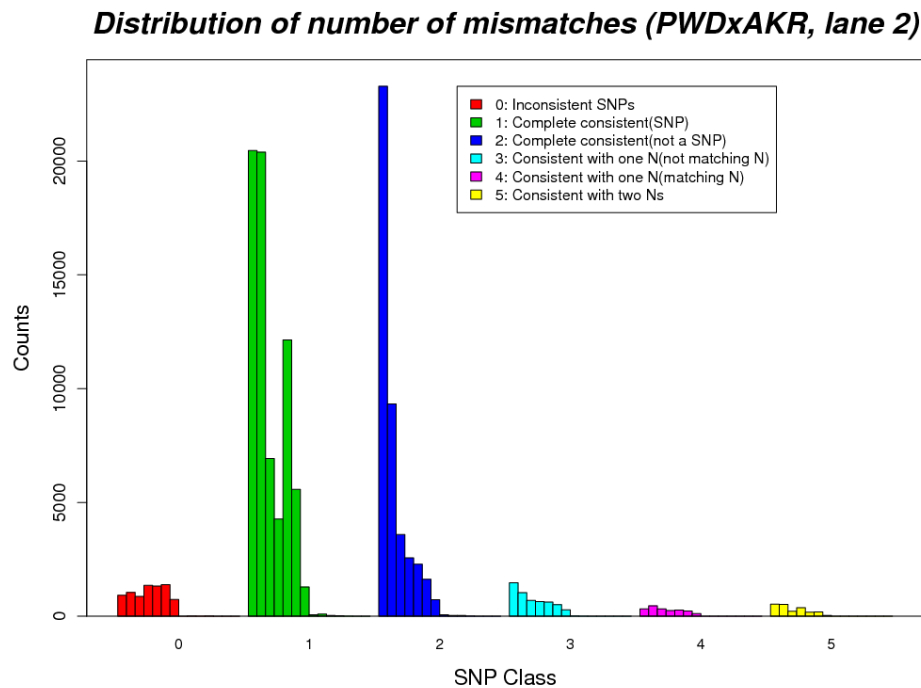

A 3).Mismatch score distribution of Solexa SNPs of lane 3, PWD x AKR, by SNP class.

***Distribution of number of mismatches (PWDxAKR, lane 3)***

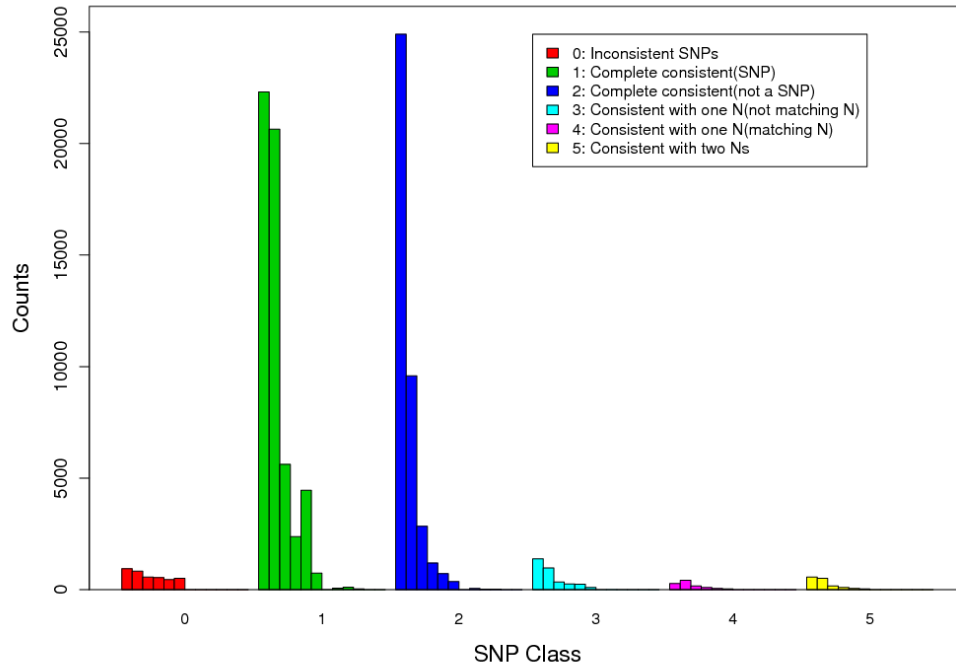

A 4).Mismatch score distribution of Solexa SNPs of lane 4, PWD x AKR, by SNP class.

**Distribution of number of mismatches (PwDxAKR, lane 4)**

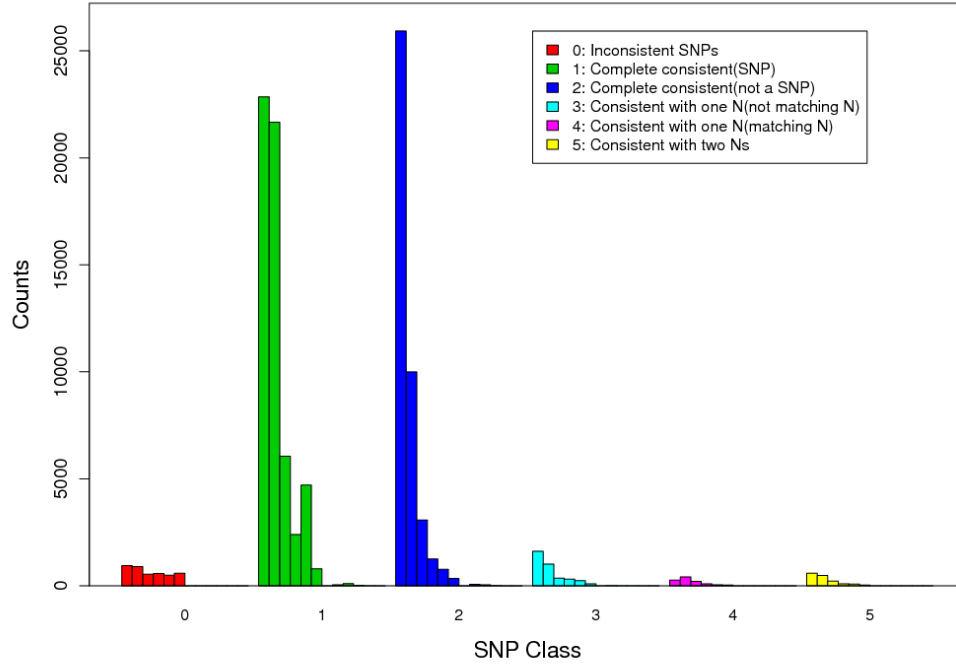

A 5).Mismatch score distribution of Solexa SNPs of lane 6, PwD x AKR, by SNP class.

**Distribution of number of mismatches (PwDxAKR, lane 6)**

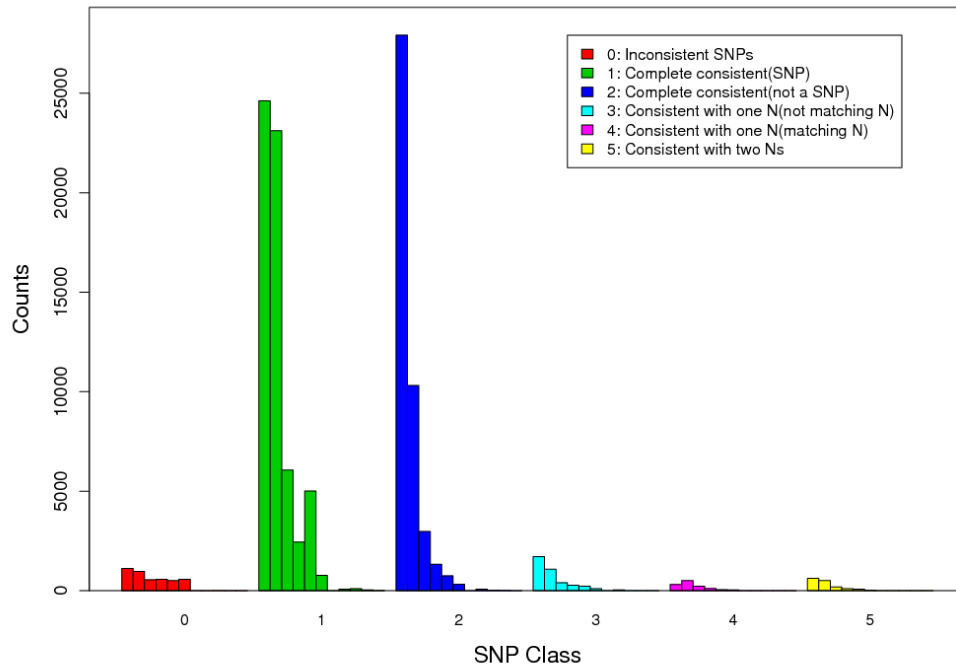

A 6).Mismatch score distribution of Solexa SNPs of lane 7, PwD x AKR, by SNP class.

**Distribution of number of mismatches (PwDxAKR, lane 7)**

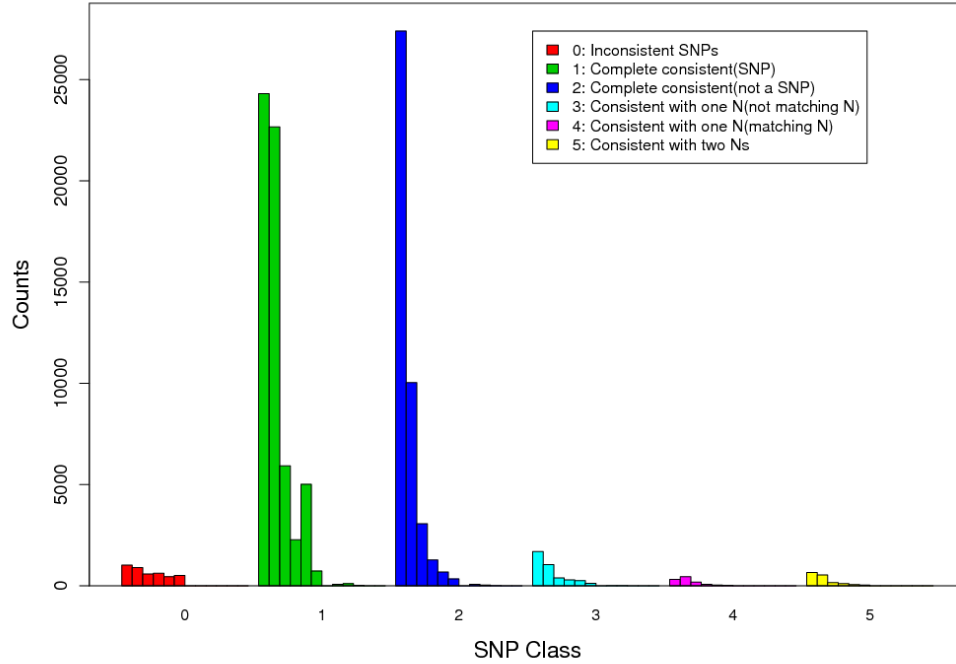

A 7).Mismatch score distribution of Solexa SNPs of lane 8, PwD x AKR, by SNP class.

**Distribution of number of mismatches (PwDxAKR, lane 8)**

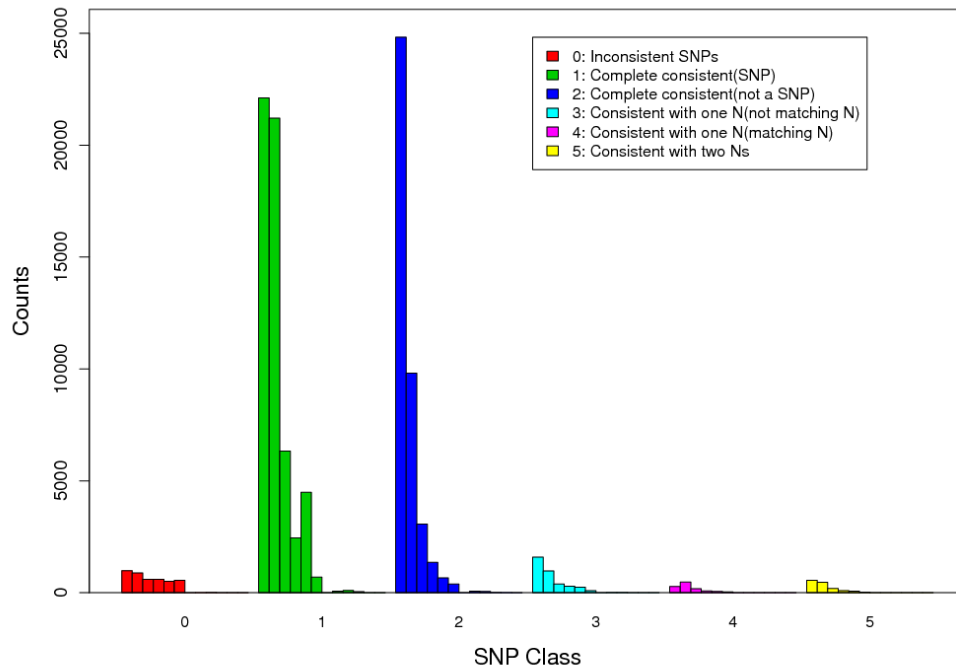

B1).Mismatch score distribution of Solexa SNPs of lane 1, AKR x PwD, by SNP class.



**Distribution of number of mismatches (AKRxPWD, lane 1)**

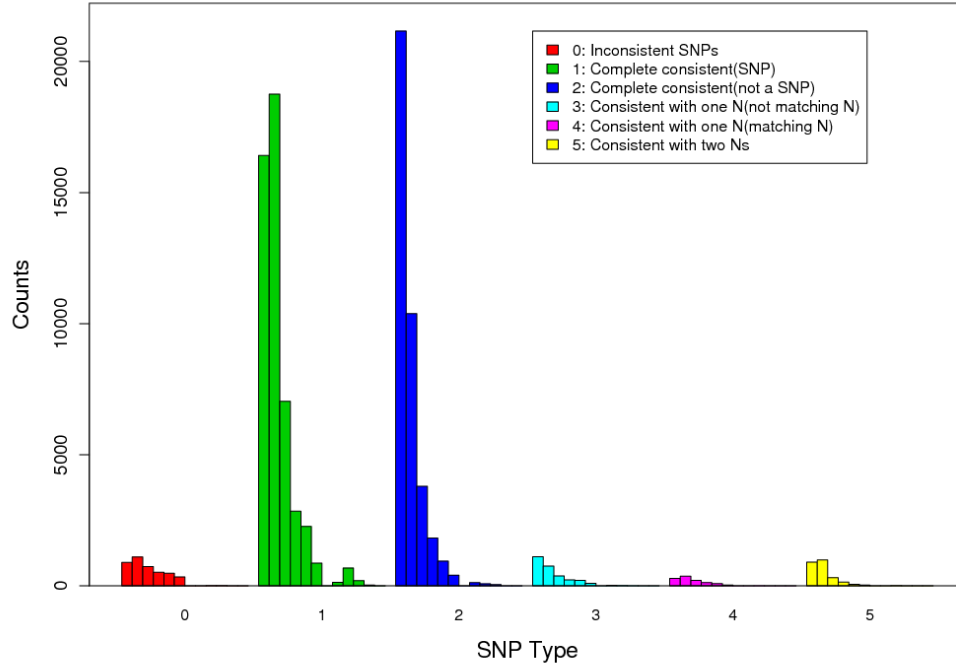

B 2).Mismatch score distribution of Solexa SNPs of lane 2, AKR x PWD, by SNP class.

**Distribution of number of mismatches (AKRxPWD, lane 2)**

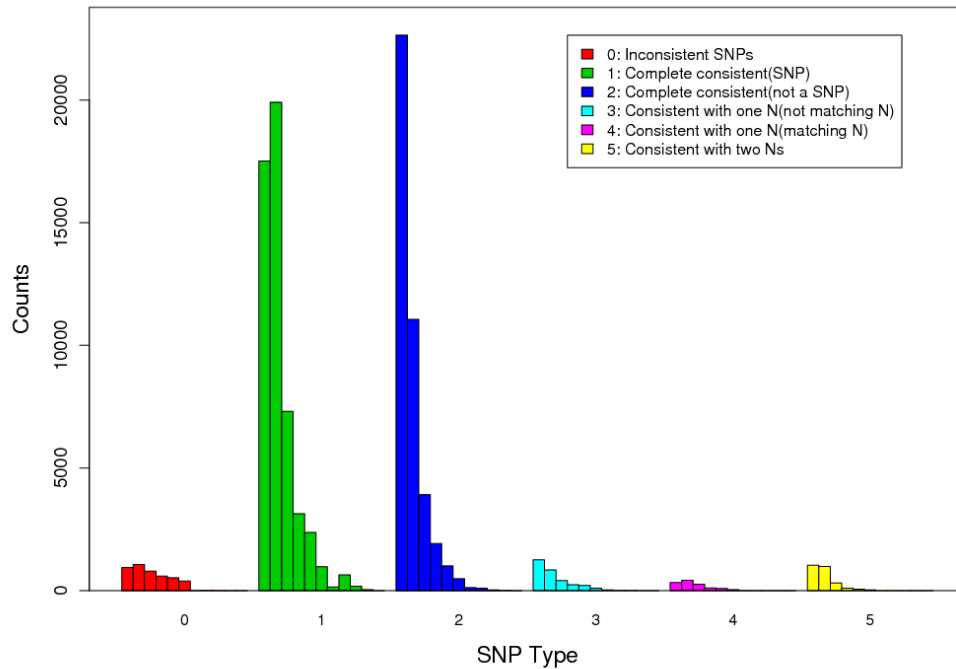

B 3).Mismatch score distribution of Solexa SNPs of lane 3, AKR x PWD, by SNP class.

**Distribution of number of mismatches (AKRxPWD, lane 3)**

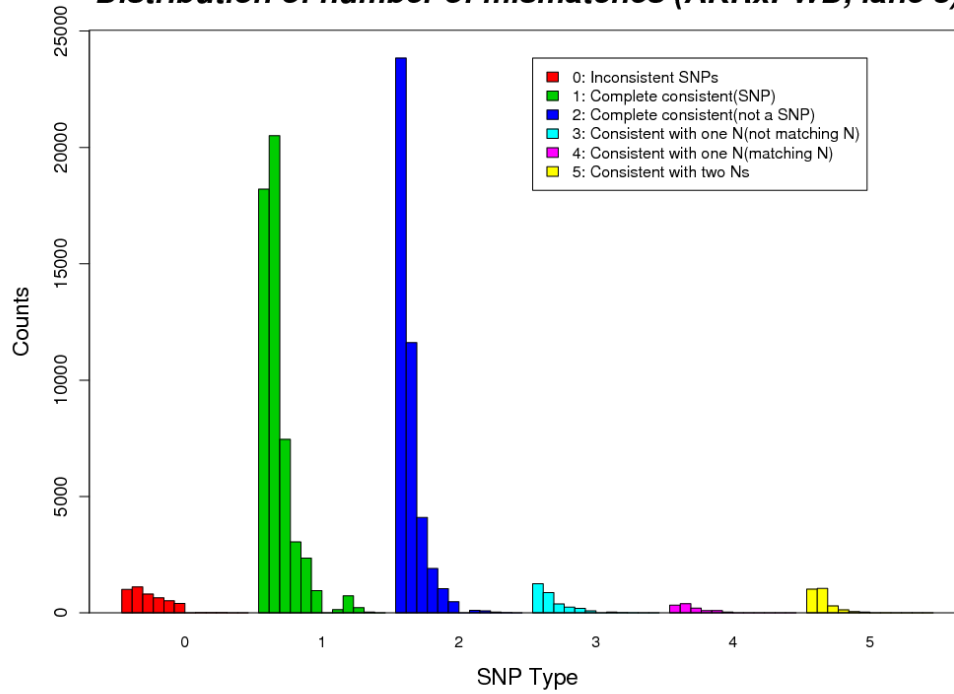

B 4).Mismatch score distribution of Solexa SNPs of lane 4, AKR x PWD, by SNP class.

**Distribution of number of mismatches (AKRxPWD, lane 4)**

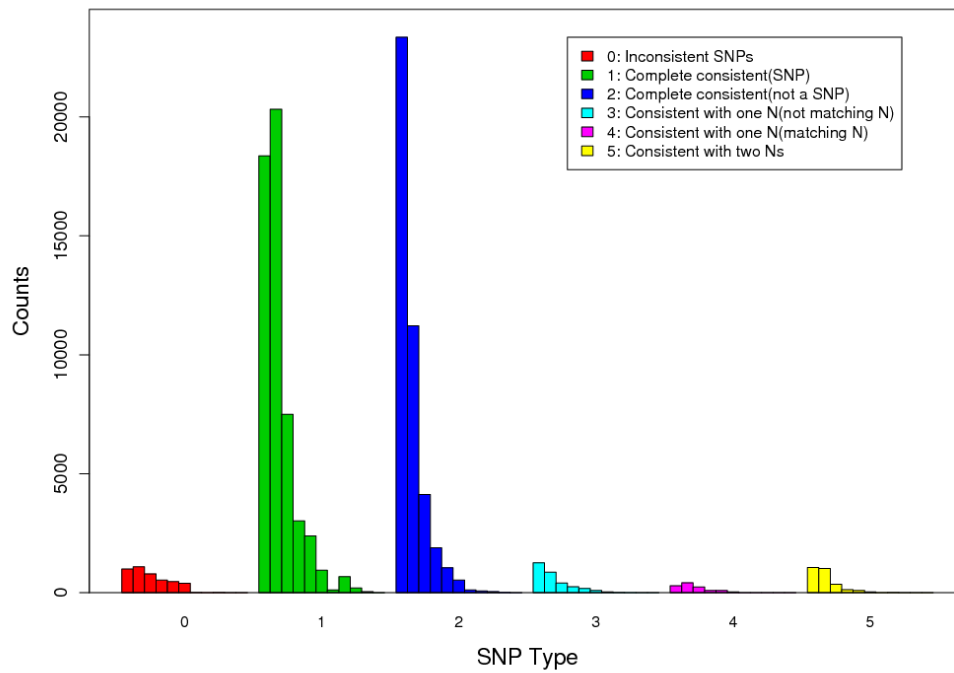

B 5).Mismatch score distribution of Solexa SNPs of lane 5, AKR x PWD, by SNP class.

**Distribution of number of mismatches (AKRxPWD, lane 5)**

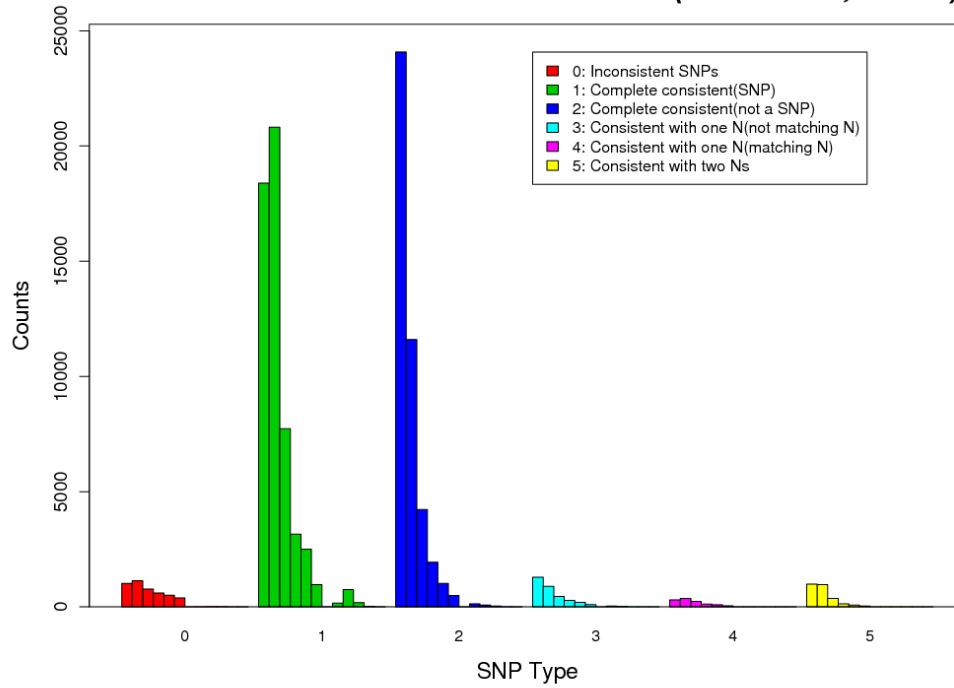

B 6).Mismatch score distribution of Solexa SNPs of lane 6, AKR x PWD, by SNP class.

**Distribution of number of mismatches (AKRxPWD, lane 6)**

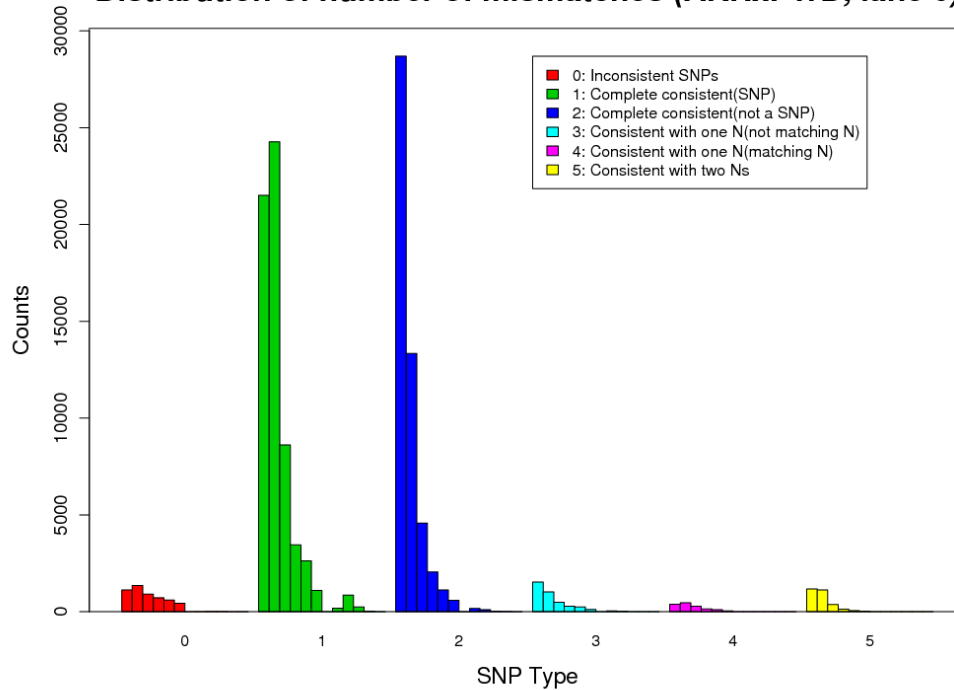

B 7).Mismatch score distribution of Solexa SNPs of lane 7, AKR x PWD, by SNP class.

**Distribution of number of mismatches (AKRxPWD, lane 7)**

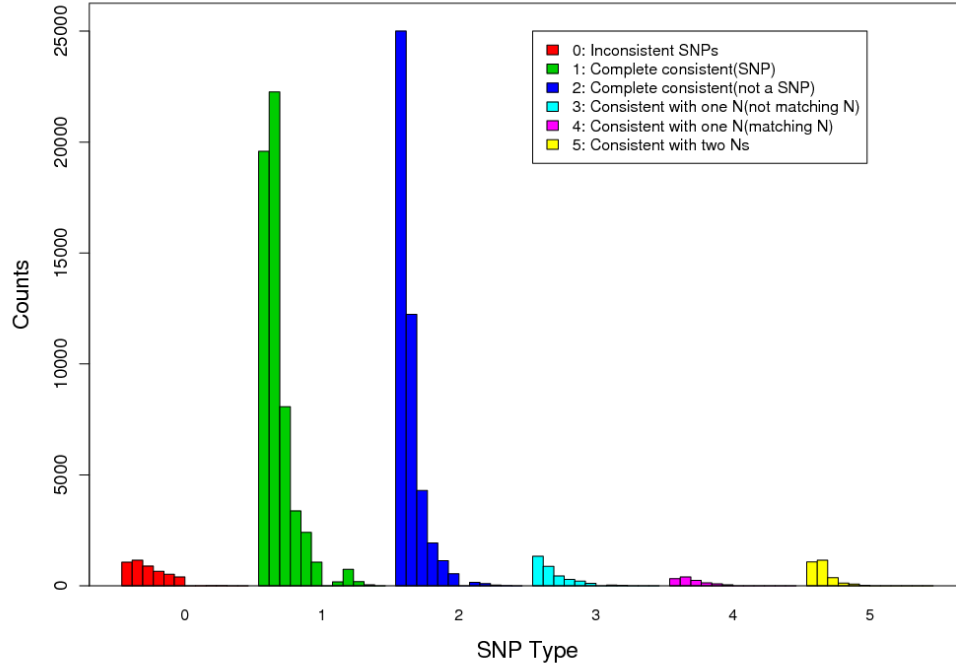

B 8).Mismatch score distribution of Solexa SNPs of lane 8, AKR x PWD, by SNP class.

**Distribution of number of mismatches (AKRxPWD, lane 8)**

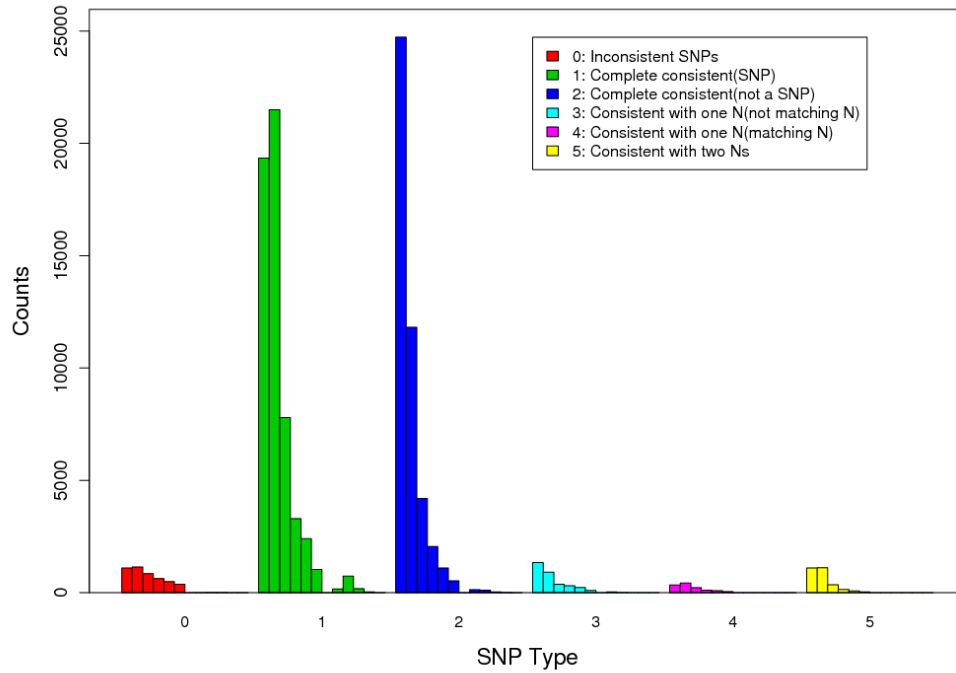

**Figure S1.17. The distribution of number of mismatches in the SNP-containing Solexa reads. A,** for the seven lanes in the Solexa run of the PWD x AKR sample. **B,** for the eight lanes in the Solexa run of the AKR x PWD sample. Figure legend: the colors stand for the SNP classes; the heights of the bars (from left to right) are the counts of SNP-containing reads with 0, 1, 2, ... mismatches. For the Class 1 SNP (super clean SNP used in following analysis), the two bars of 0 and 1 mismatch are extremely high with about 20,000 counts, representing the perfectly aligned reads the reference and alternative SNP alleles. This pattern is not seen in any other SNP classes. In the inconsistent SNP class (class 0), the number of mismatches are uniformly distributed.

**Figure S1.18. The quality score distribution of the Solexa SNPs.**

A 1). Match length of Solexa SNPs of lane 1, PWD x AKR, by SNP class.

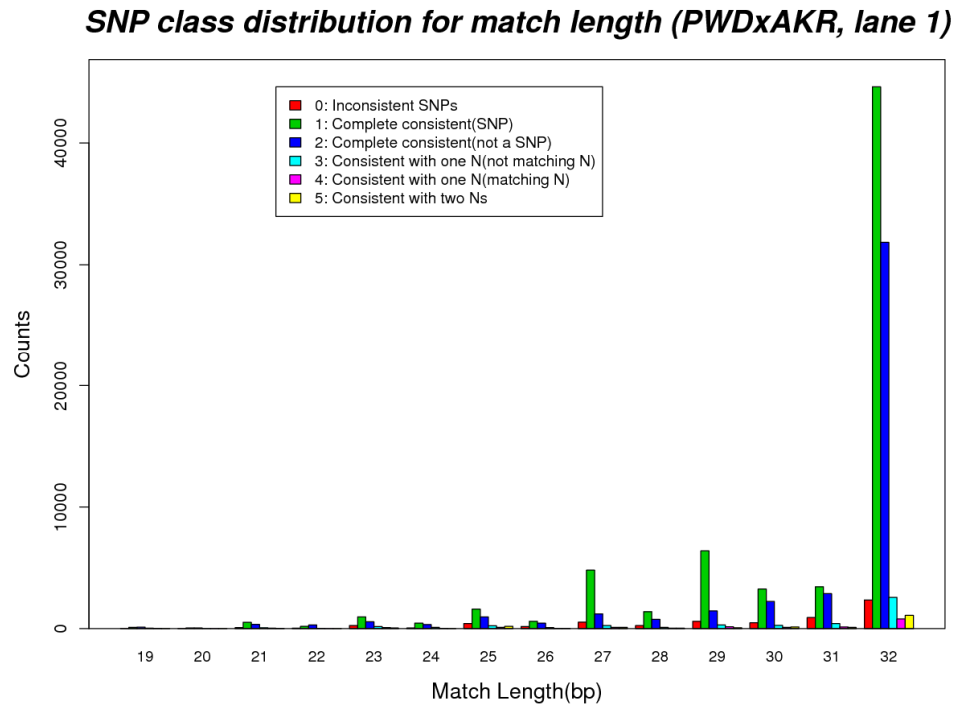

A 2). Match length of Solexa SNPs of lane 2, PWD x AKR, by SNP class.

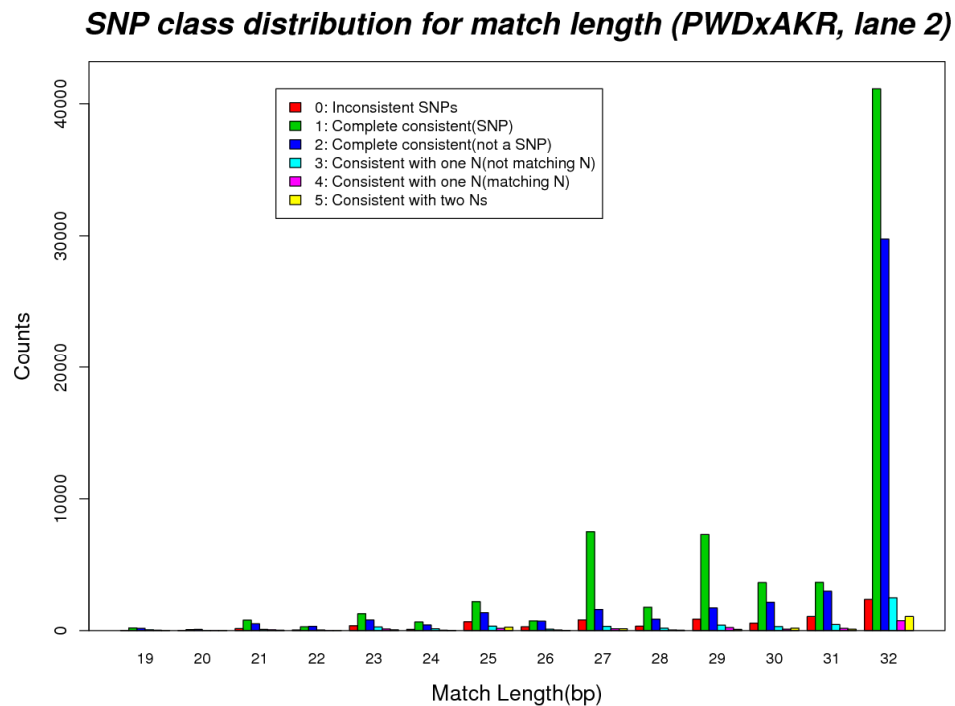

A 3). Match length of Solexa SNPs of lane 3, PWD x AKR, by SNP class.

**SNP class distribution for match length (PWDxAKR, lane 3)**

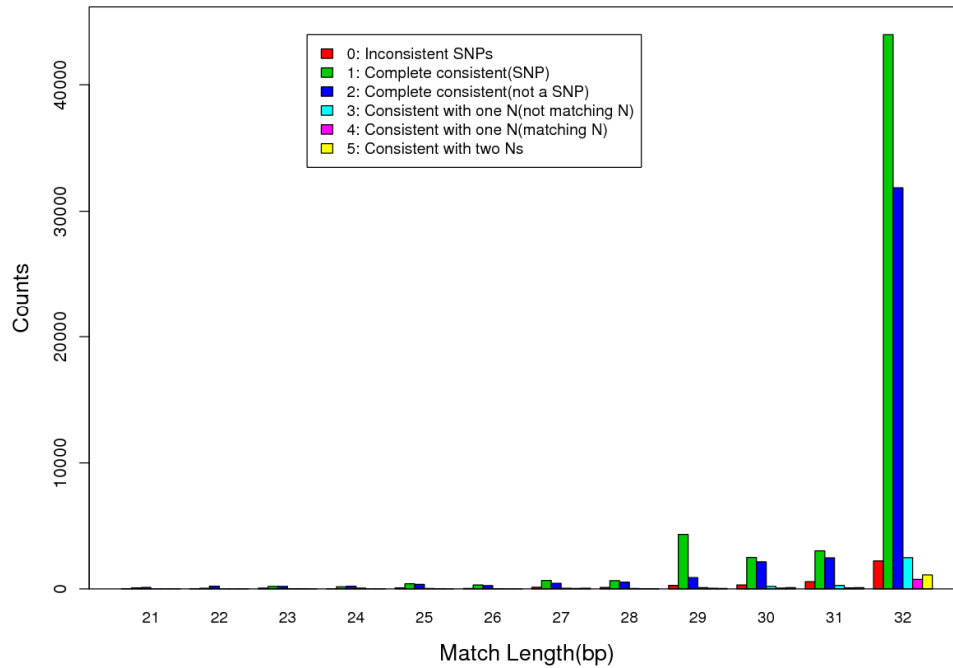

A 4). Match length of Solexa SNPs of lane 4, PWD x AKR, by SNP class.

**SNP class distribution for match length (PWDxAKR, lane 4)**

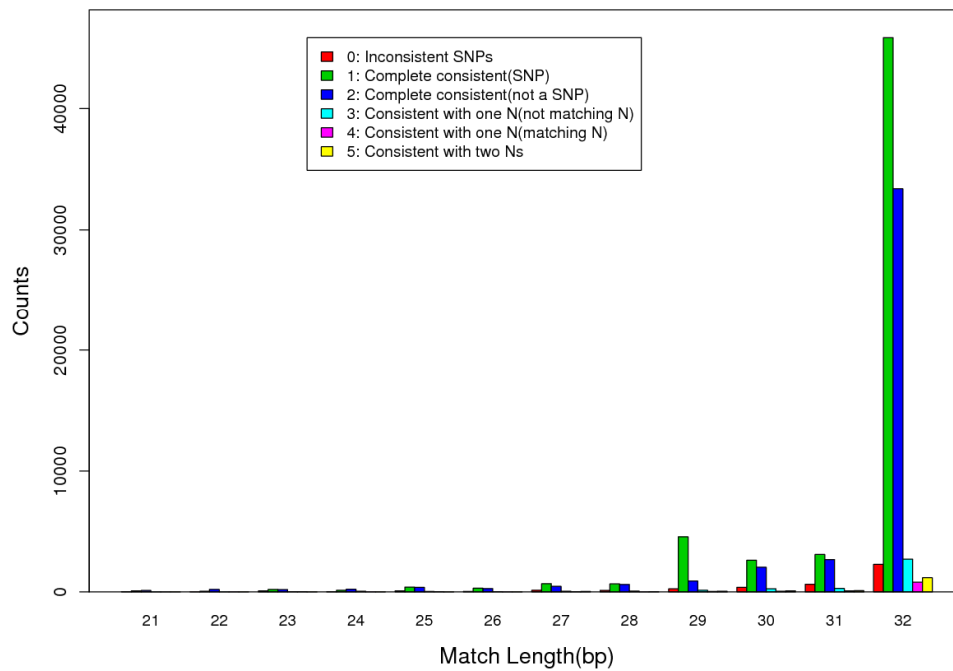

A 5). Match length of Solexa SNPs of lane 6, PWD x AKR, by SNP class.

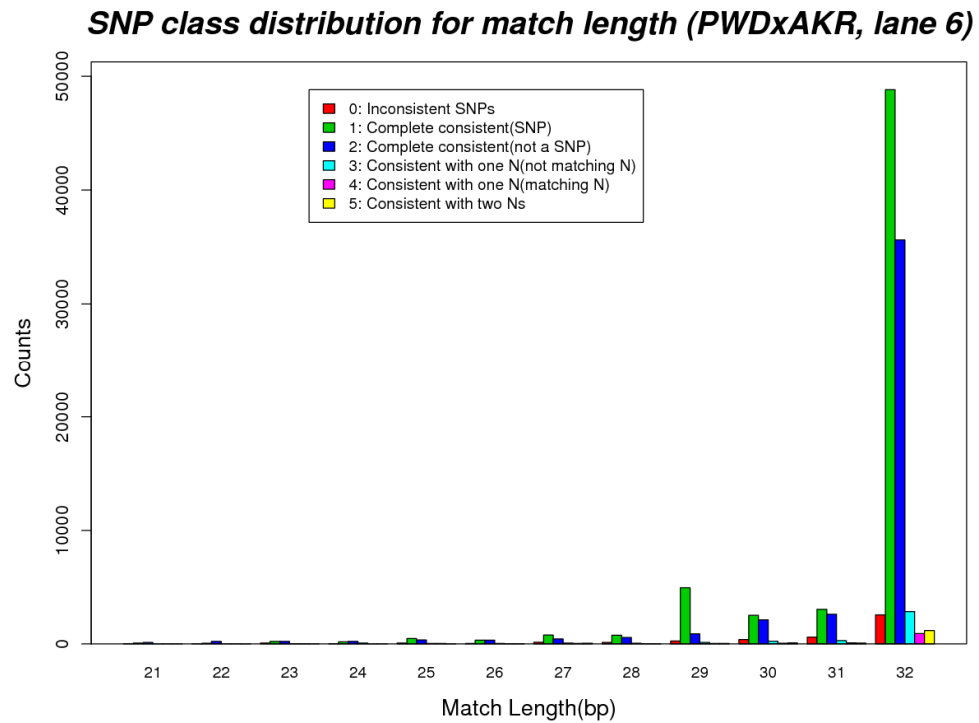

A 6). Match length of Solexa SNPs of lane 7, PWD x AKR, by SNP class.

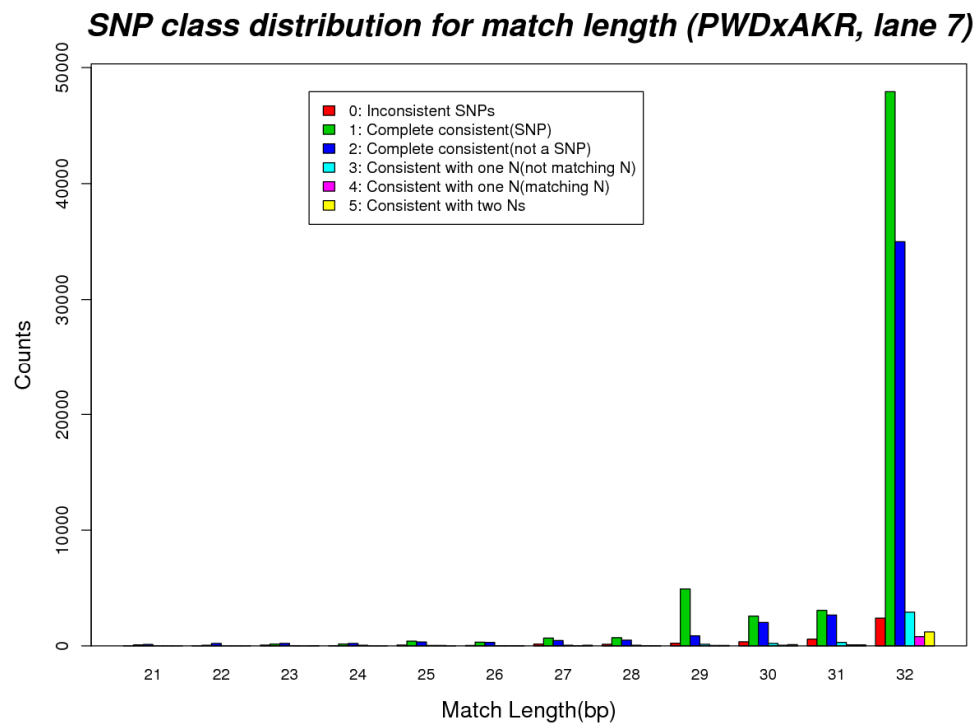



A 7). Match length of Solexa SNPs of lane 8, PWD x AKR, by SNP class.

**SNP class distribution for match length (PWDxAKR, lane 8)**

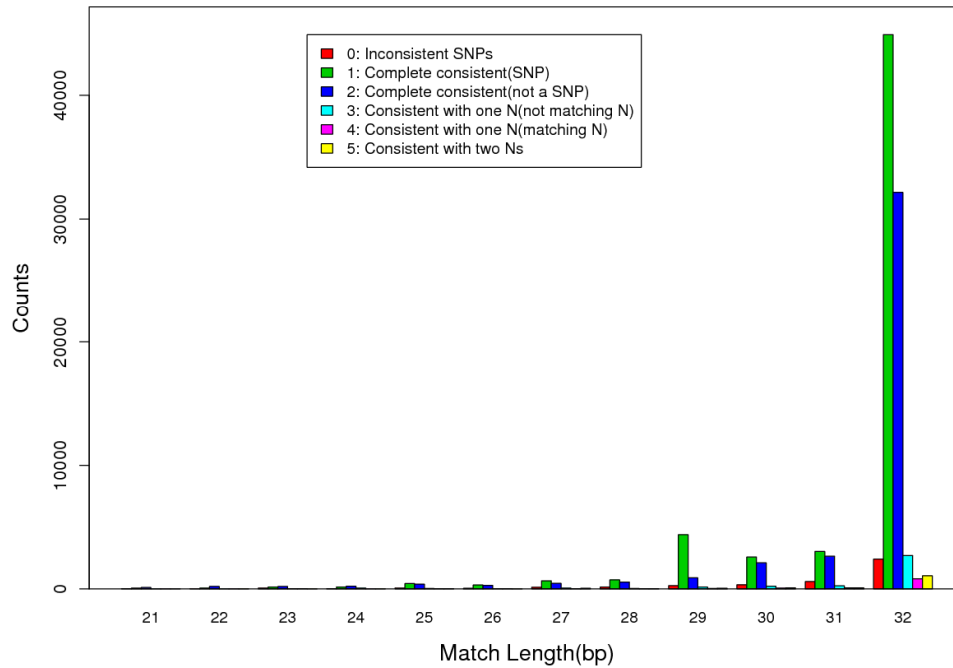

B 1). Match length of Solexa SNPs of lane 1, AKR x PWD, by SNP class.

**SNP class distribution for match length (AKRxPWD, lane 1)**

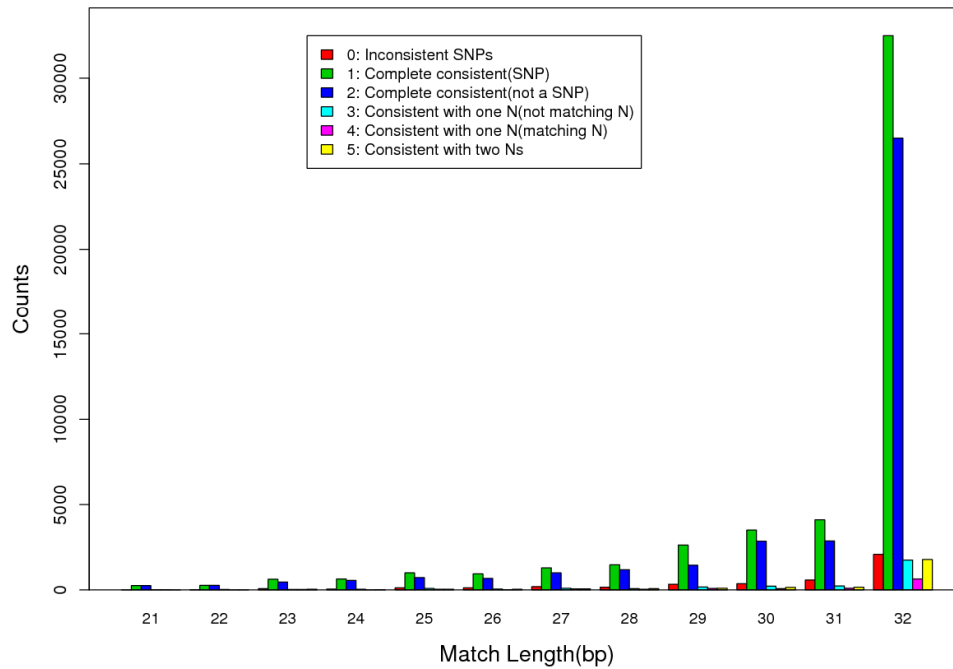

B 2). Match length of Solexa SNPs of lane 2, AKR x PWD, by SNP class.

**SNP class distribution for match length (AKRxPWD, lane 2)**

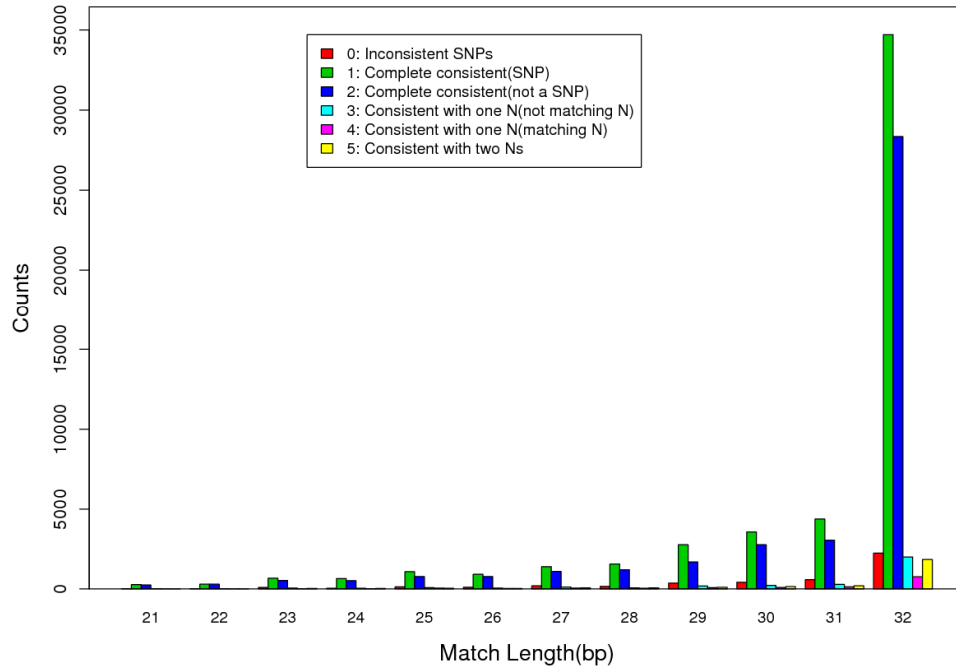

B 3). Match length of Solexa SNPs of lane 3, AKR x PWD, by SNP class.

**SNP class distribution for match length (AKRxPWD, lane 3)**

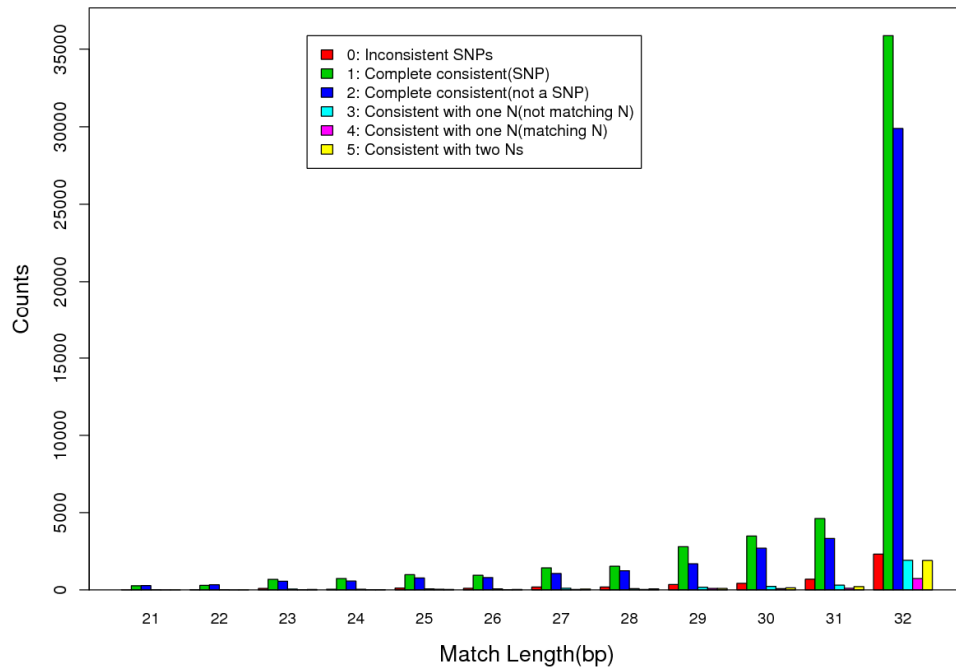

B 4). Match length of Solexa SNPs of lane 4, AKR x PWD, by SNP class.

**SNP class distribution for match length (AKRxPWD, lane 4)**

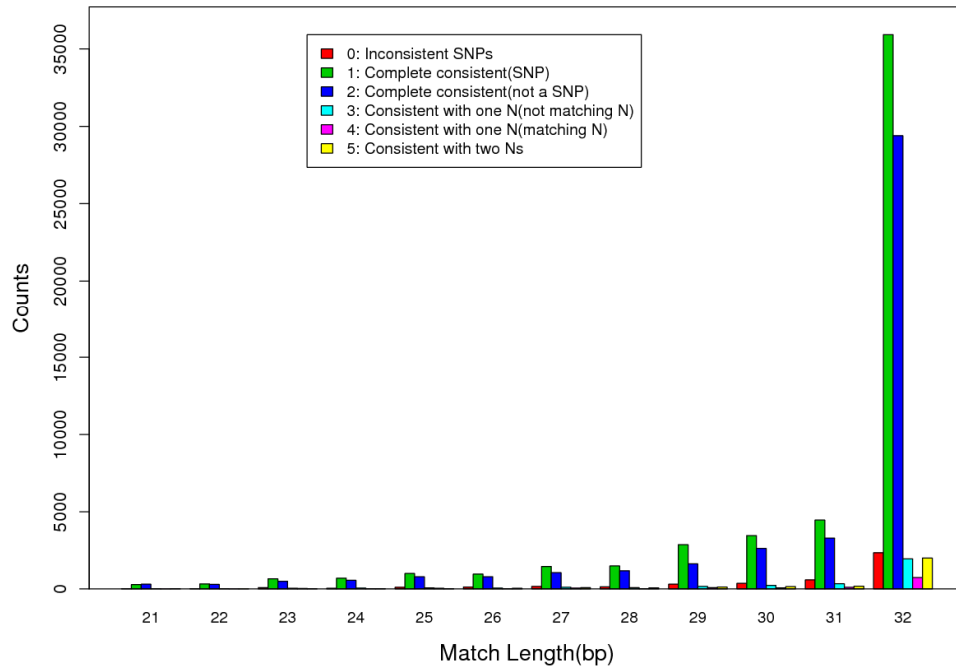

B 5). Match length of Solexa SNPs of lane 5, AKR x PWD, by SNP class.

**SNP class distribution for match length (AKRxPWD, lane 5)**

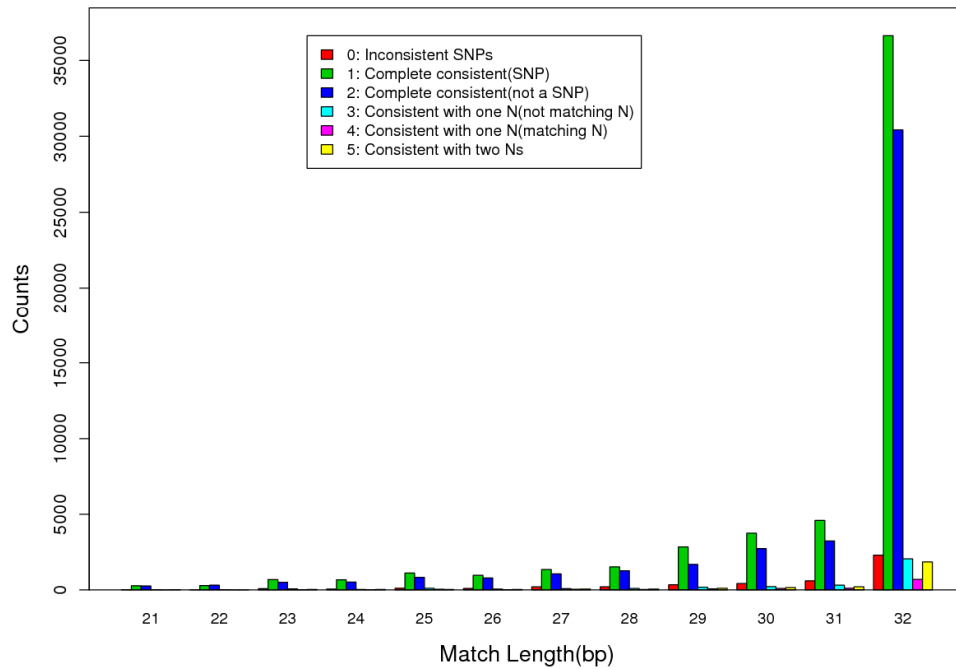

B 6). Match length of Solexa SNPs of lane 6, AKR x PWD, by SNP class.

**SNP class distribution for match length (AKRxPWD, lane 6)**

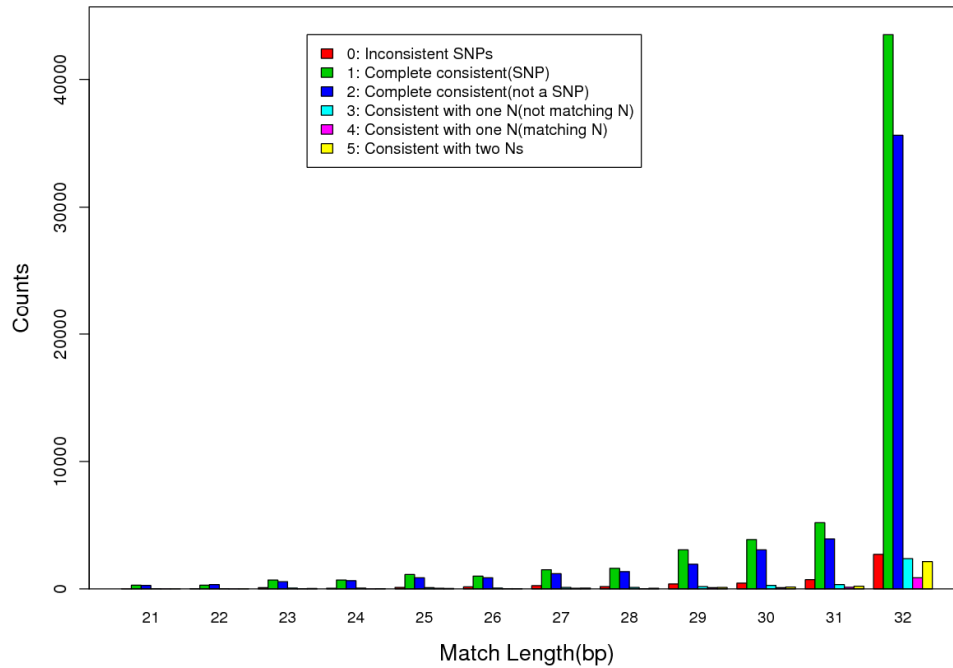

B 7). Match length of Solexa SNPs of lane 7, AKR x PWD, by SNP class.

**SNP class distribution for match length (AKRxPWD, lane 7)**

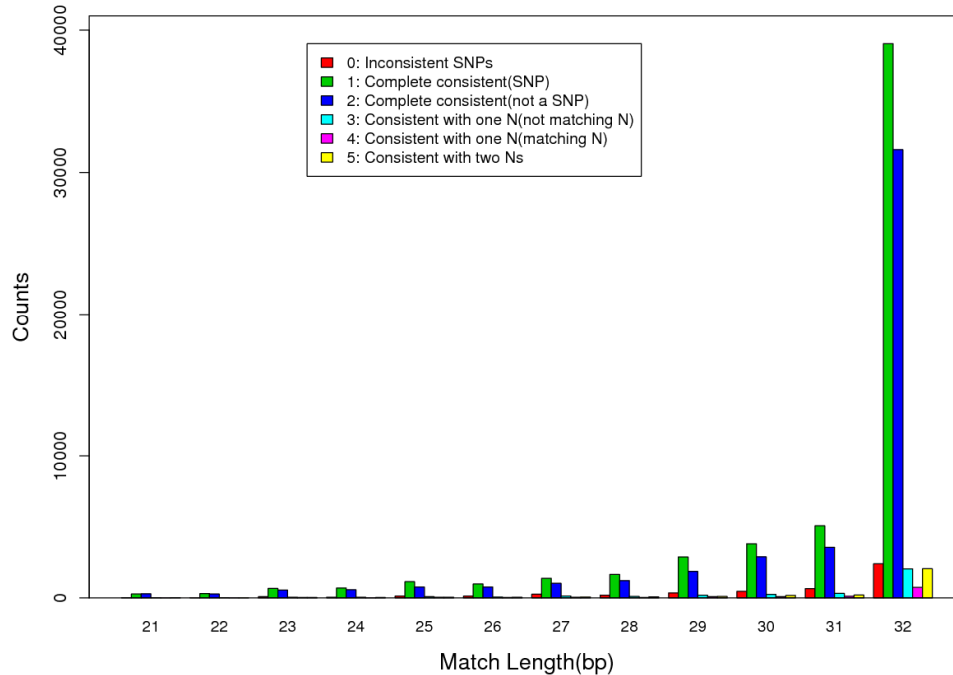

B 8). Match length of Solexa SNPs of lane 8, AKR x PWD, by SNP class.

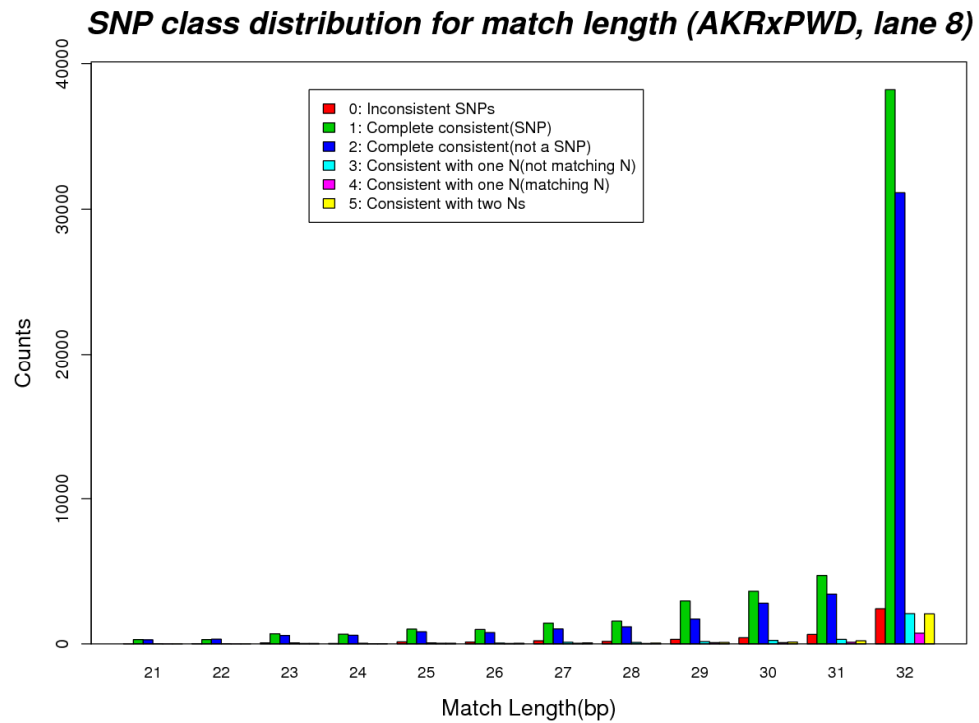

**Figure S1.18. The quality score distribution of the Solexa SNPs. A,** Match length distribution for the seven lanes in the Solexa run of the PWD x AKR sample. **B,** Match length distribution for the eight lanes in the Solexa run of the AKR x PWD sample.

**Figure S1.19. SNP calling for the Perlegen missing data.**

A. Summary of coverage of the Perlegen RefSeq SNPs.

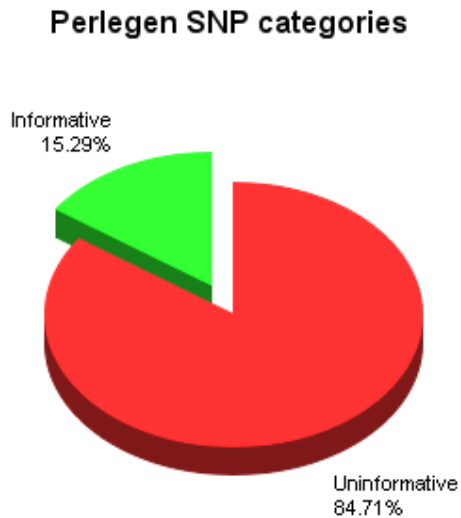

B. Summary of the Solexa Informative SNPs.

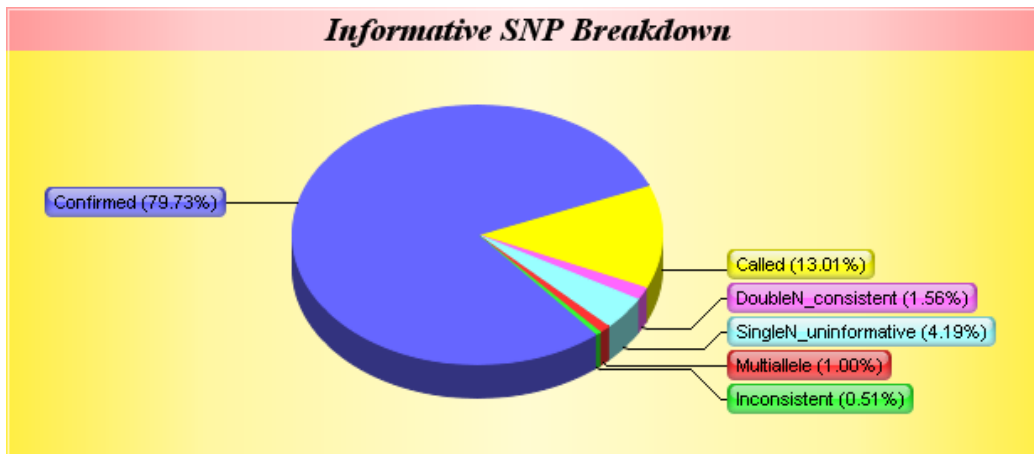

**Figure S1.19. SNP calling for the Perlegen missing data.** **A**, Summary of coverage of the Perlegen RefSeq SNPs. Informative: SNP counts  $\geq 1$  in both the two reciprocal crosses. **B**, Summary of the Solexa Informative SNPs. Confirmed: Perlegen SNPs that present in Soelxa and the genotypes agree with each other. Called: Perlegen SNPs with missing data in AKR and PWD that called based on the Solexa information.

**Figure S1.20. Coverage distribution in the Solexa data.**

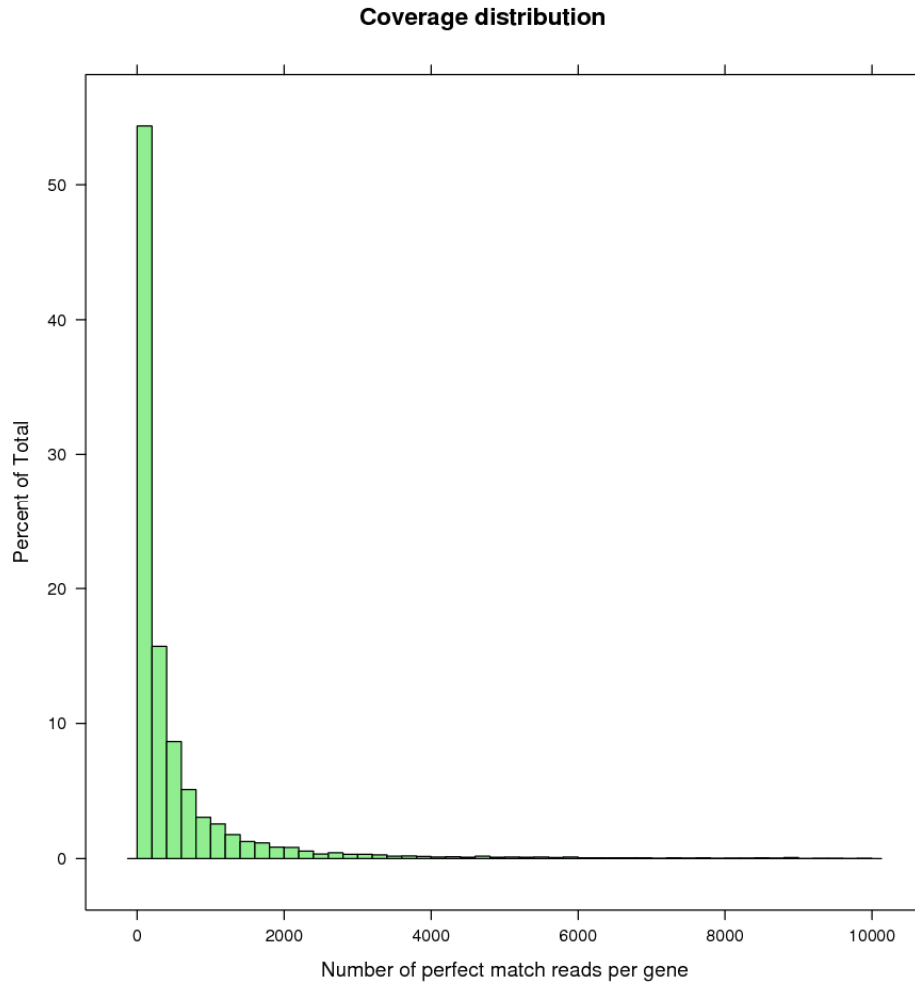

**Figure S1.20. Coverage distribution in the Solexa data.** Histogram of number of perfect match reads per gene for 15,491 RefSeq genes covered by at least one perfect match read in each of the two reciprocal crosses. (Only RefSeq genes with 10,000 or less perfect match reads are shown. There are 124 genes with number of perfect match reads > 10,000.)
