# Supplementary material for: Transcriptome-Wide Identification of Novel Imprinted Genes in Neonatal Mouse Brain
Source: PubMed Central journal article supplement (PMC2585789; doi:10.1371/journal.pone.0003839), 2008-12-04
Supplement: pone.0003839.s002.pdf [file pone.0003839.s002.pdf]

Table S1.1 Summary of blastn results

| Cross     | Lane      | Total reads | Matched reads | Percentage of match | No match  | Poly A/N* | Total hits | hits/read |
|-----------|-----------|-------------|---------------|---------------------|-----------|-----------|------------|-----------|
| PWD x AKR | s1        | 4,619,970   | 1,202,604     | 26.03%              | 3,409,387 | 7,979     | 4,369,063  | 3.63      |
|           | s2        | 4,295,871   | 1,200,111     | 24.73%              | 3,088,792 | 6,968     | 4,408,399  | 3.67      |
|           | s3        | 4,722,842   | 1,095,349     | 23.19%              | 3,615,132 | 12,361    | 3,852,524  | 3.52      |
|           | s4        | 4,853,113   | 1,126,465     | 23.21%              | 3,713,847 | 12,801    | 4,009,494  | 3.56      |
|           | s6        | 5,158,778   | 1,193,386     | 23.13%              | 3,953,819 | 11,573    | 4,249,988  | 3.56      |
|           | s7        | 5,053,146   | 1,173,701     | 23.23%              | 3,868,074 | 11,371    | 4,178,607  | 3.56      |
|           | s8        | 4,816,019   | 1,116,624     | 23.19%              | 3,688,339 | 11,056    | 3,919,609  | 3.51      |
|           | AKR x PWD | s1          | 4,096,916     | 1,241,763           | 30.31%    | 2,777,901 | 77,252     | 3,749,816 |
| s2        |           | 4,339,623   | 1,322,613     | 30.48%              | 2,922,408 | 94,602    | 3,996,721  | 3.02      |
| s3        |           | 4,447,068   | 1,361,104     | 30.61%              | 2,990,873 | 95,091    | 4,126,160  | 3.03      |
| s4        |           | 4,397,822   | 1,348,417     | 30.66%              | 2,956,351 | 93,054    | 4,073,444  | 3.02      |
| s5        |           | 4,399,210   | 1,369,262     | 31.13%              | 2,932,067 | 97,881    | 4,150,208  | 3.03      |
| s6        |           | 4,509,790   | 1,417,377     | 31.43%              | 2,992,308 | 100,105   | 4,289,787  | 3.03      |
| s7        |           | 4,493,249   | 1,444,386     | 32.15%              | 2,946,392 | 102,471   | 4,345,896  | 3.01      |
| s8        |           | 4,827,209   | 1,576,487     | 32.66%              | 3,140,904 | 109,818   | 4,746,400  | 3.01      |

\*: Low complexity reads including polyA and polyT

Table S1.2. Criteria for SNP filters of the Solexa data

---

**Filter 1**

---

- Type 1 SNP only.
  - Q-score of the SNP position  $\geq 10$
  - Mismatch score for reads containing reference allele: 3
  - Mismatch score for reads containing alternative allele: 4
- 

**Filter 2**

---

- Type 1 SNP only.
  - Q-score of the SNP position  $\geq 10$
  - SNP within 1.3kb to the 3'-end.
  - Mismatch score for reads containing reference allele: 3
  - Mismatch score for reads containing alternative allele: 4
  - Match length  $\geq 28$ .
-

Table S1.3. Summary of gene coverage and total SNP counts after filtering.

| Filter   | Gene Coverage*** |             | PWD x AKR           |                     | AKR x PWD           |                     |
|----------|------------------|-------------|---------------------|---------------------|---------------------|---------------------|
|          | RefSeq genes     | Entrez gene | AKR*                | PWD**               | AKR*                | PWD**               |
| Filter 1 | 5,533            | 5,076       | 175,560<br>(54.73%) | 145,244<br>(45.27%) | 174,300<br>(53.23%) | 153,151<br>(46.77%) |
| Filter 2 | 4,467            | 4,116       | 145,778<br>(54.47%) | 121,853<br>(45.53%) | 133,507<br>(52.44%) | 121,096<br>(47.56%) |

\*: Total counts of AKR alleles

\*\* : Total counts of PWD alleles

\*\*\*: Genes covered by a total count of 4 or more in both cross

Table S1.4. Definition of  $p_1$  and  $p_2$ .

|                         | AKR allele counts | PWD allele counts |                 |
|-------------------------|-------------------|-------------------|-----------------|
| <b>PWD</b> x <b>AKR</b> | a                 | b                 | $p_1 = a/(a+b)$ |
| <b>AKR</b> x <b>PWD</b> | c                 | d                 | $p_2 = c/(c+d)$ |

Table S1.5. Detecting genomic imprinting.

|                                      |                                                           |
|--------------------------------------|-----------------------------------------------------------|
| $p_1 \approx p_2 \approx 0.5$        | Relatively equal expression from the two parental copies. |
| $p_1 \approx p_2 > 0.5$              | eQTL with higher expression from the AKR strain           |
| $p_1 \approx p_2 < 0.5$              | eQTL with higher expression from the PWD strain           |
| $p_1 \neq p_2, p_1 > 0.5, p_2 < 0.5$ | <b>Paternal</b> ly expressed imprinted candidate gene     |
| $p_1 \neq p_2, p_1 < 0.5, p_2 > 0.5$ | <b>Maternal</b> ly expressed imprinted candidate gene     |

Table S1.6. Summary of known imprinted genes covered in Solexa reads.

| Type      | Count | Description                                                                                   |
|-----------|-------|-----------------------------------------------------------------------------------------------|
| No_RefSeq | 37    | The gene is not in the RefSeq database                                                        |
| No_SNP    | 16    | There is no SNP in the RefSeq transcript.                                                     |
| No_counts | 12    | There is SNP site within the transcripts, but there is no counts in the filtered Solexa data. |
| Covered   | 33    | The gene is covered in the Solexa data.                                                       |

Table S1.7. Known imprinted genes covered in Solexa data.

| MGIsymbol | Expressed allele | PWD x AKR |           | AKR x PWD |           | Storer-Kim p-value | Pyrosquencing |       | Reported imprinting status in brain and placenta | Reference | Total number of perfectly matched reads |
|-----------|------------------|-----------|-----------|-----------|-----------|--------------------|---------------|-------|--------------------------------------------------|-----------|-----------------------------------------|
|           |                  | AKR_count | PWD_count | AKR_count | PWD_count |                    | p1            | p2    |                                                  |           |                                         |
| Gtl2 *    | M                | 1         | 339       | 193       | 1         | 0                  | 0.000         | 1.000 | placenta                                         | 1         | 452                                     |
| H19 *     | M                | 2         | 14        | 61        | 1         | 1.68E-12           | 0.094         | 1.000 | fetal brain                                      | 2         | 247                                     |
| Cdkn1c *  | M                | 0         | 8         | 13        | 0         | 9.46E-07           | 0.036         | 1.000 | whole body of neonates                           | 3         | 521                                     |
| Commd1    | M                | 12        | 33        | 22        | 7         | 2.52E-05           | 0.412         | 0.725 | brain                                            | 4, 24     | 574                                     |
| Ppp1r9a * | M                | 36        | 54        | 67        | 26        | 1.18E-05           |               |       | placenta, partially in neonatal brain            | 5         | 2117                                    |
| Asb4      | M                | 3         | 5         | 8         | 0         | 0.01293            |               |       | brain & placenta                                 | 6         | 158                                     |
| Calcr     | M                | 0         | 1         | 6         | 0         | 0.05666            |               |       | embryonic and adult brain                        | 7         | 77                                      |
| Ube3a *   | M                | 3         | 10        | 4         | 2         | 0.08215            | 0.392         | 0.755 | brain                                            | 8         | 1660                                    |
| Gnas *    | M                | 181       | 214       | 101       | 96        | 0.21673            | 0.459         | 0.562 | other (embryos), Imprinted in pituitary          | 9         | 15998                                   |
| Gatm      | M                | 4         | 5         | 15        | 7         | 0.22627            |               |       | placenta                                         | 10        | 637                                     |
| Tnfrsf23  | M                | 2         | 2         | 2         | 0         | 0.37311            |               |       | placenta                                         | 11        | 17 <sup>§</sup>                         |
| Zim1      | M                | 0         | 1         | 2         | 1         | 0.5                |               |       | other tissue, biallelic in neonatal brain        | 12        | 19 <sup>§</sup>                         |
| Dcn       | M                | 16        | 10        | 4         | 4         | 0.59255            |               |       | placenta                                         | 6         | 344                                     |
| Nap114 *  | M                | 9         | 12        | 181       | 214       | 0.79689            |               |       | placenta                                         | 13        | 1175                                    |
| Osbpl5    | M                | 3         | 2         | 5         | 4         | 0.96653            |               |       | placenta                                         | 13        | 157                                     |
| Grb10 *   | M                | 2         | 3         | 6         | 10        | 0.98295            | 0.609         | 0.522 | placenta and brain                               | 14, 15    | 508                                     |
| Slc22a2   | M                | 0         | 1         | 0         | 1         | 1                  |               |       | placenta                                         | 16        | 11 <sup>§</sup>                         |
| Nnat      | P                | 1182      | 1         | 21        | 1853      | 0                  | 1.000         | 0.000 | neonatal brain                                   | 17        | 8561                                    |
| Snurf     | P                | 888       | 1         | 1         | 18        | 0                  | 1.000         | 0.000 | neonatal and adult brain                         | 18        | 23679                                   |
| Snrpn     | P                | 889       | 1         | 1         | 19        | 0                  | 1.000         | 0.000 | neonatal and adult brain                         | 18        | 23310                                   |
| Peg13 *   | P                | 168       | 0         | 6         | 74        | 0                  | 0.988         | 0.030 | adult brain                                      | 19        | 1088                                    |
| Nap115 *  | P                | 22        | 0         | 0         | 67        | 2.42E-22           | 1.000         | 0.000 | adult brain                                      | 19        | 2329                                    |
| Inpp5f_v2 | P                | 38        | 3         | 14        | 80        | 4.29E-19           | 0.919         | 0.078 | neonatal brain                                   | 20        | 5509                                    |
| Sgce      | P                | 9         | 0         | 0         | 54        | 6.01E-12           |               |       | adult brain & placenta                           | 21        | 313                                     |
| Rasgrf1 * | P                | 16        | 0         | 0         | 20        | 2.56E-11           | 1.000         | 0.000 | neonatal brain                                   | 22        | 93                                      |
| Impact    | P                | 15        | 6         | 8         | 83        | 6.24E-09           | 0.791         | 0.198 | embryonic and adult brain                        | 23        | 1953                                    |
| Zrsr1     | P                | 11        | 0         | 1         | 14        | 4.48E-07           | 0.975         | 0.004 | embryonic, neonatal and adult brain              | 24        | 204                                     |
| Magel2    | P                | 2         | 0         | 0         | 5         | 0.01615            |               |       | adult brain                                      | 25        | 171                                     |
| Rtl1      | P                | 0         | 3         | 2         | 0         | 0.0576             |               |       | brain and placenta                               | 26        | 62                                      |
| Peg3      | P                | 2         | 0         | 0         | 2         | 0.125              |               |       | embryonic, neonatal and adult brain              | 27        | 52                                      |
| Igf2 *    | P                | 52        | 43        | 20        | 27        | 0.17846            | 0.641         | 0.499 | placenta, biallelic in fetal brain               | 28, 2     | 247                                     |
| Copg2     | P                | 0         | 1         | 2         | 0         | 0.22222            |               |       | embryonic, neonatal and adult brain              | 29        | 302                                     |
| Slc38a4   | P                | 2         | 2         | 12        | 6         | 0.58003            |               |       | brain and placenta                               | 6         | 45 <sup>§</sup>                         |

\*: assembly information used.

§: Low expression level.

known maternally expression imprinted genes that are significant in the Solexa data  
known maternally expression imprinted genes that are not significant in the Solexa data  
known paternally expression imprinted genes that are significant in the Solexa data  
known paternally expression imprinted genes that are not significant in the Solexa data

#### References:

- <sup>1</sup> J. V. Schmidt, P. G. Matteson, B. K. Jones et al., *Genes & development* **14** (16), 1997 (2000).
- <sup>2</sup> M. Hemberger, C. Redies, R. Krause et al., *Development genes and evolution* **208** (7), 393 (1998).
- <sup>3</sup> I. Hatada and T. Mukai, *Nature genetics* **11** (2), 204 (1995).
- <sup>4</sup> Z. Zhang, K. Joh, H. Yatsuki et al., *Gene* **366** (1), 77 (2006).
- <sup>5</sup> R. Ono, H. Shiura, H. Aburatani et al., *Genome Res* **13** (7), 1696 (2003).
- <sup>6</sup> Y. Mizuno, Y. Sotomaru, Y. Katsuzawa et al., *Biochemical and biophysical research communications* **290** (5), 1499 (2002).
- <sup>7</sup> H. Hoshiya, M. Meguro, A. Kashiwagi et al., *Journal of human genetics* **48** (4), 208 (2003).
- <sup>8</sup> U. Albrecht, J. S. Sutcliffe, B. M. Cattanach et al., *Nature genetics* **17** (1), 75 (1997).
- <sup>9</sup> J. Peters, S. F. Wroe, C. A. Wells et al., *Proceedings of the National Academy of Sciences of the United States of America* **96** (7), 3830 (1999).
- <sup>10</sup> L. L. Sandell, X. J. Guan, R. Ingram et al., *Proceedings of the National Academy of Sciences of the United States of America* **100** (8), 4622 (2003).
- <sup>11</sup> L. Clark, M. Wei, G. Cattoretti et al., *BMC genetics* **3**, 11 (2002).
- <sup>12</sup> J. Kim, X. Lu, and L. Stubbs, *Human molecular genetics* **8** (5), 847 (1999).
- <sup>13</sup> S. Engemann, M. Strodicke, M. Paulsen et al., *Human molecular genetics* **9** (18), 2691 (2000).
- <sup>14</sup> T. Hikichi, T. Kohda, T. Kaneko-Ishino et al., *Nucleic acids research* **31** (5), 1398 (2003).
- <sup>15</sup> N. Miyoshi, Y. Kuroiwa, T. Kohda et al., *Proceedings of the National Academy of Sciences of the United States of America* **95** (3), 1102 (1998).
- <sup>16</sup> R. Zwart, F. Sleutels, A. Wutz et al., *Genes & development* **15** (18), 2361 (2001).
- <sup>17</sup> F. Kagitani, Y. Kuroiwa, S. Wakana et al., *Nucleic acids research* **25** (17), 3428 (1997).
- <sup>18</sup> S. E. Leff, C. I. Brannan, M. L. Reed et al., *Nature genetics* **2** (4), 259 (1992).
- <sup>19</sup> R. J. Smith, W. Dean, G. Konfortova et al., *Genome Res* **13** (4), 558 (2003).
- <sup>20</sup> J. D. Choi, L. A. Underkoffler, A. J. Wood et al., *Molecular and cellular biology* **25** (13), 5514 (2005).
- <sup>21</sup> G. Piras, A. El Kharroubi, S. Kozlov et al., *Molecular and cellular biology* **20** (9), 3308 (2000).
- <sup>22</sup> C. Plass, H. Shibata, I. Kalcheva et al., *Nature genetics* **14** (1), 106 (1996).
- <sup>23</sup> Y. Hagiwara, M. Hirai, K. Nishiyama et al., *Proceedings of the National Academy of Sciences of the United States of America* **94** (17), 9249 (1997).
- <sup>24</sup> Y. Wang, K. Joh, S. Masuko et al., *Molecular and cellular biology* **24** (1), 270 (2004).
- <sup>25</sup> I. Boccaccio, H. Glatt-Deeley, F. Watrin et al., *Human molecular genetics* **8** (13), 2497 (1999).
- <sup>26</sup> H. Seitz, N. Youngson, S. P. Lin et al., *Nature genetics* **34** (3), 261 (2003).
- <sup>27</sup> Y. Kuroiwa, T. Kaneko-Ishino, F. Kagitani et al., *Nature genetics* **12** (2), 186 (1996).
- <sup>28</sup> T. M. DeChiara, E. J. Robertson, and A. Efstratiadis, *Cell* **64** (4), 849 (1991).
- <sup>29</sup> Y. J. Lee, C. W. Park, Y. Hahn et al., *FEBS letters* **472** (2-3), 230 (2000).



Table S1.8. Sense-antisense pairs in known imprinted genes.

| Chr band | Type           | MGIsymbol      | Expressed allele | Description                              | Reference |
|----------|----------------|----------------|------------------|------------------------------------------|-----------|
| 2 E1-H3  | coding-gene    | Gnas           | M                | Stimulatory G-protein, alpha subunit     | 1,2       |
| 2 E1-H3  | antisense      | Nespas         | P                | Nesp antisense                           |           |
| 6 A3     | coding-gene    | Copg2          | P                | Coatomer protein complex subunit         | 3         |
| 6 A3     | antisense      | Copg2as2       | M                | COPG2 antisense                          |           |
| 7 B5     | coding-gene    | Mkrn3 (Zfp127) | P                | Makorin, ring finger protein             | 4         |
| 7 B5     | antisense      | Zfp127as       | P                | Mkrn3 antisense                          |           |
| 7 A2-B1  | coding-gene    | Usp29          | P                | Ubiquitin-specific protease              | 5         |
| 7 A2-B1  | antisense      | Zim3           | M                | antisense of Usp29                       | 6         |
| 7 B5     | coding-gene    | Ube3a          | M                | Ubiquitin protein ligase                 | 7         |
| 7 B5     | antisense      | UBE3A-AS       | P                | UBE3A antisense                          | 8         |
| 7 F5     | coding-gene    | Igf2           | P                | Insulin-like growth factor 2             | 9         |
| 7 F5     | antisense      | Igf2as         | P                | IGF2 antisense                           | 10        |
| 7 F5     | coding-gene    | Kcnq1          | M                | Voltage-gated potassium channel          | 11,12     |
| 7 F5     | antisense      | Kcnq1ot1       | P                | KCNQ1 antisense                          | 13        |
| 12 F1    | coding-gene    | Rtl1(Peg11)    | P                | Retrotransposon-like 1, like gag protein | 14        |
| 12 F1    | antisense      | anti-Rtl1      | M                | Rtl1 antisense                           | 14        |
| 17 A1    | coding-gene    | Igf2r          | M                | Insulin-like growth factor receptor 2    | 15        |
| 17 A1    | antisense      | Air            | P                | Igf2r antisense                          | 16        |
| X D      | Non-coding RNA | Xist           | P                | XIST                                     | 17        |
| X D      | antisense      | Tsix           | M                | XIST antisense                           | 18        |

Stain used and references:

| # | Strains used                                                                           | Reference                                                                                                                                                                                                                        |
|---|----------------------------------------------------------------------------------------|----------------------------------------------------------------------------------------------------------------------------------------------------------------------------------------------------------------------------------|
| 1 | MatDp.dist2 (maternal duplivation) and PatDp.dist2 (paternal duplication) from C3H/HeH | 1. Peters J, Wroe SF, Wells CA, Miller HJ, Bodle D, et al. (1999) A cluster of oppositely imprinted transcripts at the Gnas locus in the distal imprinting region of mouse chromosome 2. Proc Natl Acad Sci U S A 96: 3830-3835. |
| 2 | C57BL/6J X CBA/Ca                                                                      | 2. Coombes C, Arnaud P, Gordon E, Dean W, Coar EA, et al. (2003) Epigenetic properties and identification of an imprint mark in the Nesp-Gnasxl domain of the mouse Gnas imprinted locus. Mol Cell Biol 23: 5475-5488.           |
| 3 | C57BL/6J X KJR/Msf                                                                     | 3. Lee YJ, Park CW, Hahn Y, Park J, Lee J, et al. (2000) Mit1/Lb9 and Copg2, new members of mouse imprinted genes closely linked to Peg1/Mest(1). FEBS Lett 472: 230-234.                                                        |

|    |                                                                                |                                                                                                                                                                                                                                                                                             |
|----|--------------------------------------------------------------------------------|---------------------------------------------------------------------------------------------------------------------------------------------------------------------------------------------------------------------------------------------------------------------------------------------|
| 4  | 129/Rl × M.spretus                                                             | 4. Jong MT, Carey AH, Caldwell KA, Lau MH, Handel MA, et al. (1999) Imprinting of a RING zinc-finger encoding gene in the mouse chromosome region homologous to the Prader-Willi syndrome genetic region. <i>Hum Mol Genet</i> 8: 795-803.                                                  |
| 5  | 129/Sv and C57BL/6J BAC library                                                | 5. Kim J, Noskov VN, Lu X, Bergmann A, Ren X, et al. (2000) Discovery of a novel, paternally expressed ubiquitin-specific processing protease gene through comparative analysis of an imprinted region of mouse chromosome 7 and human chromosome 19q13.4. <i>Genome Res</i> 10: 1138-1147. |
| 6  | cDNA from 129/Sv, BALB/c, C3H and M.spretus                                    | 6. Kim J, Bergmann A, Wehri E, Lu X, Stubbs L (2001) Imprinting and evolution of two Kruppel-type zinc-finger genes, ZIM3 and ZNF264, located in the PEG3/USP29 imprinted domain. <i>Genomics</i> 77: 91-98.                                                                                |
| 7  | mouse with partial UPD (uniparental disomy), strain not mentioned in the paper | 7. Albrecht U, Sutcliffe JS, Cattanach BM, Beechey CV, Armstrong D, et al. (1997) Imprinted expression of the murine Angelman syndrome gene, Ube3a, in hippocampal and Purkinje neurons. <i>Nat Genet</i> 17: 75-78.                                                                        |
| 8  | CAST.c7 x129/Sv                                                                | 8. Chamberlain SJ, Brannan CI (2001) The Prader-Willi syndrome imprinting center activates the paternally expressed murine Ube3a antisense transcript but represses paternal Ube3a. <i>Genomics</i> 73: 316-322.                                                                            |
| 9  | 129/Sv/Ev, MF1, BALB/c, DBA/2J and C57BL/6J                                    | 9. DeChiara TM, Robertson EJ, Efstratiadis A (1991) Parental imprinting of the mouse insulin-like growth factor II gene. <i>Cell</i> 64: 849-859.                                                                                                                                           |
| 10 | C57BL/6 × CBA                                                                  | 10. Moore T, Constancia M, Zubair M, Bailleul B, Feil R, et al. (1997) Multiple imprinted sense and antisense transcripts, differential methylation and tandem repeats in a putative imprinting control region upstream of mouse Igf2. <i>Proc Natl Acad Sci U S A</i> 94: 12509-12514.     |
| 11 | BAC, YAC and cDNA library from C57BL/6                                         | 11. Paulsen M, Davies KR, Bowden LM, Villar AJ, Franck O, et al. (1998) Syntenic organization of the mouse distal chromosome 7 imprinting cluster and the Beckwith-Wiedemann syndrome region in chromosome 11p15.5. <i>Hum Mol Genet</i> 7: 1149-1159.                                      |
| 12 | FVB × M.castaneus                                                              | 12. Gould TD, Pfeifer K (1998) Imprinting of mouse Kvlqt1 is developmentally regulated. <i>Hum Mol Genet</i> 7: 483-487.                                                                                                                                                                    |
| 13 | PWK × C57BL/6                                                                  | 13. Fitzpatrick GV, Soloway PD, Higgins MJ (2002) Regional loss of imprinting and growth deficiency in mice with a targeted deletion of KvDMR1. <i>Nat Genet</i> 32: 426-431.                                                                                                               |
| 14 | UPD (uniparental disomy) mice, strain not mentioned in the paper               | 14. Seitz H, Youngson N, Lin SP, Dalbert S, Paulsen M, et al. (2003) Imprinted microRNA genes transcribed antisense to a reciprocally imprinted retrotransposon-like gene. <i>Nat Genet</i> 34: 261-262.                                                                                    |
| 15 | BLAB/c × C3H                                                                   | 15. Barlow DP, Stoger R, Herrmann BG, Saito K, Schweifer N (1991) The mouse insulin-like growth factor type-2 receptor is imprinted and closely linked to the Tme locus. <i>Nature</i> 349: 84-87.                                                                                          |
| 16 | C57BL/c × M.spretus                                                            | 16. Hu JF, Balaguru KA, Ivaturi RD, Oruganti H, Li T, et al. (1999) Lack of reciprocal genomic imprinting of sense and antisense RNA of mouse insulin-like growth factor II receptor in the central nervous system. <i>Biochem Biophys Res Commun</i> 257: 604-608.                         |
| 17 | C57BL/6J X CBA/Ca                                                              | 17. Kay GF, Barton SC, Surani MA, Rastan S (1994) Imprinting and X chromosome counting mechanisms determine Xist expression in early mouse development. <i>Cell</i> 77: 639-650.                                                                                                            |
| 18 | C57BL/6 × JF1                                                                  | 18. Sado T, Wang Z, Sasaki H, Li E (2001) Regulation of imprinted X-chromosome inactivation in mice by Tsix. <i>Development</i> 128: 1275-1286.                                                                                                                                             |

---

Table S1.9. Closely linked and reciprocal imprinted genes covered in Solexa data.

| Gene_name     | Chr   | PWD x AKR |     | AKR x PWD |      | q-value  | AKR percentage |       | IP status |
|---------------|-------|-----------|-----|-----------|------|----------|----------------|-------|-----------|
|               |       | AKR       | PWD | AKR       | PWD  |          | p1             | p2    |           |
| Peg13         | chr15 | 168       | 0   | 6         | 74   | 0        | 1.000          | 0.075 | 100%      |
| 1810044A24Rik | chr15 | 7         | 20  | 25        | 5    | 1.08E-03 | 0.259          | 0.833 | Partially |
| Nnat          | chr2  | 1182      | 1   | 21        | 1853 | 0        | 0.999          | 0.011 | 100%      |
| Blcap         | chr2  | 6         | 13  | 15        | 2    | 0.0252   | 0.316          | 0.882 | partially |
| Zrsr1         | chr11 | 11        | 0   | 1         | 14   | 6.68E-05 | 1.000          | 0.067 | 100%      |
| Commd1        | chr11 | 12        | 33  | 22        | 7    | 2.55E-03 | 0.267          | 0.759 | partially |

Table S1.10. Non-significant genes with total counts 25 or more in each of the two reciprocal crosses.

| RefSeq_ID    | PWD x AKR |     | AKR x PWD |     | Gene_name     | Chr  | RefSeq_len | B37_SNP_position | q-value  | p1    | p2    |
|--------------|-----------|-----|-----------|-----|---------------|------|------------|------------------|----------|-------|-------|
|              | AKR       | PWD | AKR       | PWD |               |      |            |                  |          |       |       |
| NM_009438    | 221       | 199 | 18        | 9   | Sntg1         | chr1 | 4193       | 9193264          | 0.37945  | 0.895 | 0.667 |
| NM_010517    | 15        | 14  | 61        | 42  | 3110035E14Rik | chr1 | 3187       | 9616434          | 0.947901 | 0.571 | 0.592 |
| NM_026302    | 16        | 26  | 74        | 32  | Stau2         | chr1 | 2198       | 16334335         | 0.947901 | 0.667 | 0.698 |
| NM_012021    | 59        | 26  | 106       | 86  | Gdap1         | chr1 | 3934       | 17151276         | 0.852521 | 0.484 | 0.552 |
| NM_177681    | 36        | 17  | 27        | 21  | Ogfrl1        | chr1 | 4844       | 23375818         | 0.947901 | 0.5   | 0.563 |
| NM_021548    | 104       | 89  | 34        | 13  | 1110058L19Rik | chr1 | 660        | 24010006         | 0.947901 | 0.667 | 0.723 |
| NM_007502    | 77        | 57  | 48        | 58  | Bai3          | chr1 | 5457       | 25185678         | 0.947901 | 0.417 | 0.453 |
| NM_013917    | 91        | 126 | 158       | 45  | Ptp4a1        | chr1 | 4153       | 31001822         | 0.419101 | 0.654 | 0.778 |
| NM_133837    | 52        | 104 | 71        | 97  | B230209C24Rik | chr1 | 2318       | 33940325         | 0.712972 | 0.527 | 0.423 |
| NM_008974    | 39        | 40  | 13        | 17  | Dst           | chr1 | 17277      | 34172986         | 0.947901 | 0.391 | 0.433 |
| NM_057172    | 19        | 10  | 22        | 21  | BC043098      | chr1 | 4955       | 34870617         | 0.855763 | 0.607 | 0.512 |
| NM_080555    | 20        | 28  | 49        | 36  | Plekhb2       | chr1 | 3317       | 34934064         | 0.947901 | 0.63  | 0.576 |
| NM_033623    | 21        | 19  | 26        | 21  | 4632411B12Rik | chr1 | 4663       | 36414969         | 0.80737  | 0.659 | 0.553 |
| NM_180678    | 58        | 40  | 17        | 29  | Actr1b        | chr1 | 2077       | 36758142         | 0.947901 | 0.412 | 0.37  |
| NM_001042634 | 187       | 103 | 368       | 242 | Mrpl30        | chr1 | 691        | 37954568         | 0.504192 | 0.669 | 0.603 |
| NM_001039934 | 125       | 195 | 37        | 38  | Txndc9        | chr1 | 4596       | 38043980         | 0.947901 | 0.429 | 0.493 |
| NM_134065    | 30        | 14  | 55        | 44  | Eif5b         | chr1 | 7797       | 38108780         | 0.947901 | 0.603 | 0.556 |
| NM_011261    | 54        | 40  | 26        | 20  | Rev1          | chr1 | 4279       | 38155856         | 0.947901 | 0.593 | 0.565 |
| NM_025550    | 22        | 20  | 111       | 89  | Chst10        | chr1 | 3135       | 38954911         | 0.537791 | 0.465 | 0.555 |
| NM_199021    | 33        | 16  | 139       | 62  | Pdcl3         | chr1 | 1706       | 39053906         | 0.405723 | 0.581 | 0.692 |
| NM_010684    | 119       | 74  | 56        | 31  | Mrps9         | chr1 | 1365       | 42962311         | 0.677707 | 0.516 | 0.644 |
| NM_009133    | 128       | 148 | 85        | 94  | Tpp2          | chr1 | 4649       | 44058975         | 0.935339 | 0.423 | 0.475 |
| NM_146165    | 193       | 54  | 29        | 23  | Bivm          | chr1 | 3529       | 44200106         | 0.947901 | 0.493 | 0.558 |
| NM_001013778 | 58        | 49  | 26        | 13  | Col3a1        | chr1 | 4786       | 45403996         | 0.915297 | 0.767 | 0.667 |
| NM_011436    | 16        | 28  | 47        | 35  | Wdr75         | chr1 | 2612       | 45879770         | 0.947901 | 0.625 | 0.573 |
| NM_027009    | 18        | 24  | 29        | 22  | Tmeff2        | chr1 | 3340       | 51242688         | 0.947901 | 0.6   | 0.569 |
| NM_007793    | 198       | 77  | 49        | 54  | Myo1b         | chr1 | 4933       | 51853906         | 0.783653 | 0.613 | 0.476 |
| NM_172562    | 84        | 117 | 39        | 34  | Sf3b1         | chr1 | 6192       | 55068964         | 0.805861 | 0.659 | 0.534 |
| NM_015762    | 21        | 7   | 88        | 42  | Prei3         | chr1 | 2845       | 55210999         | 0.775128 | 0.59  | 0.677 |
| NM_009670    | 27        | 25  | 34        | 20  | Satb2         | chr1 | 5299       | 56954826         | 0.903782 | 0.54  | 0.63  |
| NM_001030274 | 165       | 154 | 50        | 55  | Clk1          | chr1 | 1818       | 58480848         | 0.097758 | 0.645 | 0.476 |
| NM_025790    | 62        | 45  | 116       | 43  | Ndufb3        | chr1 | 532        | 58652657         | 0.601754 | 0.615 | 0.73  |
| NM_152810    | 22        | 26  | 34        | 39  | Als2          | chr1 | 6348       | 59294046         | 0.947901 | 0.542 | 0.466 |
| NM_139272    | 35        | 18  | 85        | 94  | Ndufs1        | chr1 | 2564       | 63199462         | 0.847106 | 0.542 | 0.475 |
| NM_009130    | 36        | 31  | 184       | 154 | Eef1b2        | chr1 | 857        | 63225106         | 0.467305 | 0.629 | 0.544 |
| NM_019571    | 20        | 28  | 59        | 71  | Adam23        | chr1 | 6656       | 63642430         | 0.459791 | 0.606 | 0.454 |
| NM_019393    | 126       | 185 | 166       | 94  | Idh1          | chr1 | 2270       | 65217542         | 0.063455 | 0.477 | 0.638 |
| NM_011653    | 727       | 388 | 370       | 788 | Mtap2         | chr1 | 5535       | 66485497         | 0.301202 | 0.391 | 0.32  |
| NM_008187    | 11        | 18  | 17        | 23  | Lancl1        | chr1 | 4270       | 67085096         | 0.947901 | 0.419 | 0.425 |
| NM_007998    | 35        | 67  | 16        | 20  | Fn1           | chr1 | 8312       | 71695775         | 0.80737  | 0.585 | 0.444 |
| NM_207650    | 53        | 22  | 48        | 36  | Mar4          | chr1 | 4217       | 72582049         | 0.947901 | 0.54  | 0.571 |
| NM_007694    | 151       | 113 | 84        | 82  | Rpl37a        | chr1 | 431        | 72760121         | 0.942332 | 0.567 | 0.506 |
| NM_020494    | 99        | 114 | 135       | 104 | Igfbp5        | chr1 | 5854       | 72920447         | 0.903782 | 0.605 | 0.565 |
| NM_027289    | 44        | 21  | 76        | 102 | Arpc2         | chr1 | 1597       | 74314392         | 0.525209 | 0.527 | 0.427 |
| NM_021518    | 21        | 12  | 40        | 31  | Dnajb10       | chr1 | 1855       | 75241700         | 0.58647  | 0.445 | 0.563 |
| NM_010064    | 91        | 72  | 12        | 15  | Farsb         | chr1 | 2132       | 78440320         | 0.947901 | 0.448 | 0.444 |
| NM_011955    | 44        | 33  | 39        | 30  | Mrpl44        | chr1 | 1424       | 79777605         | 0.624757 | 0.75  | 0.565 |

|              |      |      |     |     |               |      |      |           |          |       |       |
|--------------|------|------|-----|-----|---------------|------|------|-----------|----------|-------|-------|
| NM_008963    | 218  | 154  | 135 | 95  | Serpine2      | chr1 | 2151 | 79813448  | 0.947901 | 0.574 | 0.587 |
| NM_029447    | 178  | 67   | 211 | 244 | 5230400G24Rik | chr1 | 1920 | 82748413  | 0.947901 | 0.452 | 0.464 |
| NM_029814    | 58   | 117  | 62  | 69  | 4930544G21Rik | chr1 | 6841 | 83285397  | 0.498119 | 0.644 | 0.473 |
| NM_025624    | 1149 | 1459 | 401 | 377 | Dner          | chr1 | 3664 | 84442060  | 0.915297 | 0.552 | 0.515 |
| NM_133922    | 7    | 19   | 23  | 9   | Itm2c         | chr1 | 2024 | 87804656  | 0.947901 | 0.66  | 0.719 |
| NM_001037999 | 61   | 77   | 21  | 14  | Eif4e2        | chr1 | 3394 | 89136200  | 0.947901 | 0.571 | 0.6   |
| NM_001005223 | 58   | 31   | 16  | 9   | Atg16l1       | chr1 | 3066 | 89687176  | 0.947901 | 0.64  | 0.64  |
| NM_018804    | 149  | 157  | 28  | 7   | Hdac4         | chr1 | 3960 | 93926709  | 0.762643 | 0.671 | 0.8   |
| NM_013899    | 38   | 65   | 34  | 27  | Ndufa10       | chr1 | 1222 | 94367466  | 0.947901 | 0.495 | 0.557 |
| NM_145398    | 19   | 22   | 29  | 30  | Rnpepl1       | chr1 | 2489 | 94812486  | 0.744899 | 0.32  | 0.492 |
| NM_009819    | 42   | 21   | 17  | 16  | Mterfd2       | chr1 | 3315 | 95201238  | 0.815655 | 0.651 | 0.515 |
| NM_008971    | 33   | 13   | 27  | 16  | Bok           | chr1 | 1432 | 95591943  | 0.947901 | 0.625 | 0.628 |
| NM_181394    | 25   | 17   | 180 | 198 | Tsn           | chr1 | 3040 | 120205360 | 0.947901 | 0.443 | 0.476 |
| NM_012015    | 18   | 11   | 38  | 30  | Mki67ip       | chr1 | 1646 | 120229541 | 0.947901 | 0.556 | 0.559 |
| NM_178764    | 127  | 122  | 21  | 24  | Clasp1        | chr1 | 7827 | 120504980 | 0.941916 | 0.371 | 0.467 |
| NM_026069    | 138  | 108  | 150 | 311 | Dbi           | chr1 | 593  | 122009935 | 0.255447 | 0.442 | 0.325 |
| NM_010497    | 71   | 78   | 36  | 55  | Dpp10         | chr1 | 4634 | 125750758 | 0.071722 | 0.673 | 0.396 |
| NM_011294    | 106  | 109  | 35  | 19  | Ubx2          | chr1 | 4093 | 130175429 | 0.941663 | 0.552 | 0.648 |
| NM_175398    | 17   | 9    | 9   | 25  | Mcm6          | chr1 | 2901 | 130256041 | 0.355031 | 0.545 | 0.265 |
| NM_009443    | 29   | 22   | 34  | 21  | Pfkfb2        | chr1 | 4506 | 132611110 | 0.947901 | 0.571 | 0.618 |
| NM_001081360 | 21   | 11   | 55  | 67  | Srgap2        | chr1 | 8040 | 133260600 | 0.901101 | 0.517 | 0.451 |
| NM_024243    | 34   | 43   | 20  | 23  | Slc41a1       | chr1 | 4752 | 133743597 | 0.525209 | 0.66  | 0.465 |
| NM_177298    | 122  | 124  | 5   | 21  | Ripk5         | chr1 | 6385 | 134363066 | 0.813566 | 0.333 | 0.192 |
| NM_009308    | 16   | 10   | 46  | 34  | Zc3h11a       | chr1 | 4395 | 135543992 | 0.813566 | 0.483 | 0.575 |
| NM_025509    | 40   | 45   | 47  | 40  | Rnpep         | chr1 | 2249 | 137180206 | 0.947901 | 0.462 | 0.54  |
| NM_008721    | 160  | 155  | 53  | 52  | Timm17a       | chr1 | 917  | 137206414 | 0.947901 | 0.466 | 0.505 |
| NM_029354    | 22   | 47   | 52  | 38  | Nav1          | chr1 | 8841 | 137368992 | 0.84529  | 0.657 | 0.578 |
| NM_178880    | 30   | 13   | 70  | 47  | Tmem9         | chr1 | 1445 | 137930663 | 0.947901 | 0.638 | 0.598 |
| NM_026676    | 15   | 72   | 109 | 59  | Kif21b        | chr1 | 9119 | 138070743 | 0.933057 | 0.598 | 0.649 |
| NM_019913    | 179  | 146  | 36  | 58  | Camsap11      | chr1 | 7823 | 138221347 | 0.18768  | 0.656 | 0.383 |
| NM_054053    | 28   | 4    | 30  | 19  | Glr2          | chr1 | 3482 | 145596791 | 0.947901 | 0.654 | 0.612 |
| NM_026780    | 27   | 32   | 72  | 77  | Trove2        | chr1 | 8736 | 145624090 | 0.947901 | 0.548 | 0.483 |
| NM_011034    | 295  | 310  | 99  | 108 | Tpr           | chr1 | 7529 | 152296289 | 0.936394 | 0.429 | 0.478 |
| NM_023312    | 157  | 111  | 69  | 76  | Ivns1abp      | chr1 | 3513 | 153210662 | 0.805861 | 0.37  | 0.476 |
| NM_182997    | 22   | 20   | 163 | 185 | Arpc5         | chr1 | 1782 | 154621425 | 0.84104  | 0.402 | 0.468 |
| NM_011406    | 35   | 19   | 51  | 91  | Smg7          | chr1 | 5840 | 154707590 | 0.947901 | 0.386 | 0.359 |
| NM_026506    | 20   | 22   | 25  | 32  | 6430517E21Rik | chr1 | 4169 | 160285993 | 0.942325 | 0.525 | 0.439 |
| NM_001038993 | 119  | 54   | 56  | 42  | Astn1         | chr1 | 7181 | 160587288 | 0.602323 | 0.455 | 0.571 |
| NM_025515    | 22   | 12   | 279 | 168 | Cacybp        | chr1 | 1493 | 162138691 | 0.624757 | 0.549 | 0.624 |
| NM_026845    | 43   | 27   | 15  | 14  | Prdx6         | chr1 | 2334 | 163174355 | 0.947901 | 0.434 | 0.517 |
| NM_010887    | 41   | 40   | 195 | 160 | Dnm3          | chr1 | 7534 | 164283688 | 0.947901 | 0.573 | 0.549 |
| NM_133703    | 55   | 27   | 353 | 262 | Kifap3        | chr1 | 3907 | 165845884 | 0.947901 | 0.574 | 0.574 |
| NM_172401    | 33   | 29   | 19  | 18  | Atp1b1        | chr1 | 2422 | 166368147 | 0.947901 | 0.568 | 0.514 |
| NM_019827    | 37   | 17   | 24  | 18  | Mpzl1         | chr1 | 2356 | 167522548 | 0.947901 | 0.622 | 0.571 |
| NM_024284    | 9    | 23   | 24  | 14  | Dusp12        | chr1 | 1413 | 172815229 | 0.783653 | 0.786 | 0.632 |
| NM_010699    | 49   | 139  | 49  | 65  | Sdhc          | chr1 | 1170 | 173080700 | 0.947901 | 0.455 | 0.43  |
| NM_170593    | 36   | 52   | 80  | 55  | Ndufs2        | chr1 | 1606 | 173177139 | 0.682906 | 0.505 | 0.593 |
| NM_024220    | 206  | 220  | 44  | 39  | Ufc1          | chr1 | 964  | 173224831 | 0.947901 | 0.554 | 0.53  |
| NM_027400    | 63   | 71   | 13  | 21  | Fh1           | chr1 | 1588 | 177549194 | 0.785646 | 0.527 | 0.382 |
| NM_010897    | 20   | 13   | 84  | 122 | 2310005N03Rik | chr1 | 448  | 180251876 | 0.710344 | 0.49  | 0.408 |
| NM_130895    | 32   | 10   | 15  | 15  | Smyd3         | chr1 | 3769 | 181335462 | 0.726189 | 0.342 | 0.5   |
| NM_144901    | 48   | 208  | 59  | 36  | Srp9          | chr1 | 1388 | 184061972 | 0.947901 | 0.553 | 0.621 |

|              |      |      |     |                  |      |       |           |          |       |       |
|--------------|------|------|-----|------------------|------|-------|-----------|----------|-------|-------|
| NM_133218    | 121  | 92   | 27  | 21 Slc30a10      | chr1 | 5836  | 187291763 | 0.945732 | 0.462 | 0.563 |
| NM_009441    | 176  | 130  | 18  | 14 Nenf          | chr1 | 658   | 193130695 | 0.673494 | 0.372 | 0.563 |
| NM_019489    | 232  | 52   | 45  | 0 Plxna2         | chr1 | 11049 | 196638409 | 0.947901 | 1     | 1     |
| NM_001081251 | 77   | 48   | 23  | 11 Akap12        | chr1 | 6198  | 5988621   | 0.792184 | 0.529 | 0.676 |
| NM_015733    | 23   | 9    | 48  | 44 Ppp1r14c      | chr1 | 2524  | 6922985   | 0.947901 | 0.567 | 0.522 |
| NM_009136    | 16   | 14   | 64  | 39 Pcmt1         | chr1 | 1580  | 7359885   | 0.947901 | 0.652 | 0.621 |
| NM_025546    | 68   | 38   | 29  | 20 Stxbp5        | chr1 | 9074  | 9584842   | 0.633314 | 0.393 | 0.592 |
| NM_029274    | 37   | 33   | 18  | 17 Sf3b5         | chr1 | 727   | 12728339  | 0.641017 | 0.67  | 0.514 |
| NM_028105    | 22   | 23   | 36  | 27 Vta1          | chr1 | 1343  | 14404779  | 0.947901 | 0.578 | 0.571 |
| NM_198326    | 136  | 121  | 23  | 11 Reps1         | chr1 | 2618  | 17842924  | 0.947901 | 0.593 | 0.676 |
| NM_033370    | 10   | 27   | 287 | 308 Ahi1         | chr1 | 4751  | 20798941  | 0.947901 | 0.515 | 0.482 |
| NM_010360    | 26   | 31   | 69  | 95 Stx7          | chr1 | 2500  | 23907460  | 0.301202 | 0.569 | 0.421 |
| NM_022432    | 15   | 23   | 66  | 38 Ptpk          | chr1 | 6177  | 28316448  | 0.947901 | 0.586 | 0.635 |
| NM_008567    | 18   | 15   | 54  | 76 Echdc1        | chr1 | 3048  | 29064982  | 0.72236  | 0.563 | 0.415 |
| NM_011200    | 51   | 27   | 198 | 116 Hdcc2        | chr1 | 718   | 31047788  | 0.947901 | 0.659 | 0.631 |
| NM_008298    | 48   | 34   | 18  | 12 Rwdd1         | chr1 | 1082  | 33739246  | 0.943372 | 0.519 | 0.6   |
| NM_025374    | 172  | 56   | 85  | 52 Tspyl1        | chr1 | 2670  | 34004530  | 0.945732 | 0.543 | 0.62  |
| NM_025291    | 50   | 60   | 67  | 122 Hdac2        | chr1 | 2004  | 36721613  | 0.601949 | 0.5   | 0.354 |
| NM_015824    | 47   | 26   | 19  | 9 Lama4          | chr1 | 5663  | 38829765  | 0.86501  | 0.538 | 0.679 |
| NM_001040699 | 20   | 29   | 90  | 65 Fyn           | chr1 | 3258  | 39284534  | 0.805861 | 0.494 | 0.581 |
| NM_176942    | 10   | 16   | 53  | 30 2410016F19Rik | chr1 | 1020  | 39977452  | 0.920095 | 0.574 | 0.639 |
| NM_009946    | 71   | 58   | 63  | 45 Ostm1         | chr1 | 3001  | 42421032  | 0.947901 | 0.604 | 0.583 |
| NM_001008543 | 108  | 26   | 99  | 57 Cd24a         | chr1 | 1825  | 43302439  | 0.920751 | 0.593 | 0.635 |
| NM_028811    | 89   | 41   | 51  | 30 Gja1          | chr1 | 3105  | 56107472  | 0.805861 | 0.519 | 0.63  |
| NM_028632    | 57   | 71   | 74  | 78 Lims1         | chr1 | 4244  | 57884466  | 0.947901 | 0.567 | 0.487 |
| NM_011732    | 1064 | 1051 | 59  | 51 D10Ertd641e   | chr1 | 1329  | 59465784  | 0.915297 | 0.619 | 0.536 |
| NM_009908    | 94   | 70   | 89  | 85 Ascc1         | chr1 | 1524  | 59562670  | 0.381503 | 0.667 | 0.511 |
| NM_023172    | 447  | 324  | 47  | 39 Sar1a         | chr1 | 2602  | 61154270  | 0.57016  | 0.393 | 0.547 |
| NM_013581    | 10   | 15   | 82  | 30 Ank3          | chr1 | 6966  | 69486740  | 0.189309 | 0.519 | 0.732 |
| NM_031405    | 38   | 89   | 27  | 12 Ube2d1        | chr1 | 1427  | 70718171  | 0.833193 | 0.813 | 0.692 |
| NM_001081240 | 25   | 8    | 37  | 41 Specc11       | chr1 | 5923  | 74774985  | 0.933057 | 0.385 | 0.474 |
| NM_177630    | 68   | 70   | 44  | 20 Ddt           | chr1 | 609   | 75234005  | 0.947901 | 0.653 | 0.688 |
| NM_013531    | 44   | 19   | 15  | 13 Dip2a         | chr1 | 6356  | 75784304  | 0.947901 | 0.561 | 0.536 |
| NM_021436    | 39   | 15   | 47  | 6 Pcbp3          | chr1 | 2012  | 76355341  | 0.457473 | 0.735 | 0.887 |
| NM_016797    | 62   | 47   | 23  | 26 Adarb1        | chr1 | 6572  | 76822389  | 0.150615 | 0.762 | 0.469 |
| NM_010838    | 68   | 18   | 16  | 12 1810008A18Rik | chr1 | 2415  | 76960124  | 0.947901 | 0.541 | 0.571 |
| NM_133685    | 30   | 27   | 252 | 157 Cstb         | chr1 | 620   | 77889740  | 0.158693 | 0.72  | 0.616 |
| NM_053071    | 32   | 31   | 71  | 68 Polr2e        | chr1 | 1022  | 79498817  | 0.923252 | 0.444 | 0.511 |
| NM_008077    | 55   | 62   | 110 | 92 Rps15         | chr1 | 500   | 79756489  | 0.947901 | 0.575 | 0.545 |
| NM_024221    | 33   | 42   | 62  | 45 Apc2          | chr1 | 9074  | 79780622  | 0.947901 | 0.576 | 0.579 |
| NM_026684    | 42   | 82   | 27  | 20 Ap3d1         | chr1 | 4730  | 80193682  | 0.86501  | 0.468 | 0.574 |
| NM_021568    | 50   | 18   | 47  | 38 Timm13        | chr1 | 1225  | 80362758  | 0.947901 | 0.493 | 0.553 |
| NM_026254    | 24   | 11   | 36  | 31 Sgta          | chr1 | 1966  | 80514970  | 0.947901 | 0.482 | 0.537 |
| NM_010942    | 174  | 122  | 222 | 145 Eef2         | chr1 | 3111  | 80639433  | 0.611212 | 0.55  | 0.605 |
| NM_022310    | 55   | 36   | 17  | 9 Atcay          | chr1 | 3677  | 80687264  | 0.859249 | 0.523 | 0.654 |
| NM_007624    | 6    | 22   | 38  | 45 Nfyb          | chr1 | 2552  | 82215284  | 0.947901 | 0.488 | 0.458 |
| NM_178056    | 127  | 127  | 125 | 9 Txnrd1         | chr1 | 3310  | 82358745  | 0.153968 | 0.75  | 0.933 |
| NM_019780    | 157  | 141  | 41  | 53 Aldh1l2       | chr1 | 5959  | 82990176  | 0.897731 | 0.524 | 0.436 |
| NM_017367    | 67   | 47   | 15  | 34 Nuak1         | chr1 | 5032  | 83843528  | 0.701206 | 0.463 | 0.306 |
| NM_144518    | 28   | 23   | 73  | 47 Ckap4         | chr1 | 2915  | 83989290  | 0.751919 | 0.71  | 0.608 |
| NM_019413    | 41   | 37   | 29  | 20 Cry1          | chr1 | 3035  | 84611372  | 0.677707 | 0.412 | 0.592 |
| NM_019439    | 107  | 115  | 26  | 33 Prdm4         | chr1 | 3935  | 85370149  | 0.947901 | 0.371 | 0.441 |



|              |     |     |      |      |               |      |       |           |          |       |       |
|--------------|-----|-----|------|------|---------------|------|-------|-----------|----------|-------|-------|
| NM_009250    | 89  | 66  | 40   | 35   | D10Wsu52e     | chr1 | 1979  | 85418480  | 0.947901 | 0.491 | 0.533 |
| NM_146193    | 39  | 52  | 21   | 6    | Fbxo7         | chr1 | 1886  | 85509537  | 0.947901 | 0.68  | 0.778 |
| NM_134118    | 91  | 153 | 51   | 45   | Timp3         | chr1 | 4681  | 85808893  | 0.450421 | 0.31  | 0.531 |
| NM_026388    | 84  | 113 | 44   | 60   | Pmch          | chr1 | 748   | 87553835  | 0.947901 | 0.458 | 0.423 |
| NM_026937    | 48  | 24  | 29   | 51   | 4930547N16Rik | chr1 | 3628  | 87609280  | 0.841387 | 0.462 | 0.363 |
| NM_025551    | 80  | 57  | 22   | 25   | Ccdc53        | chr1 | 1053  | 87708534  | 0.947901 | 0.482 | 0.468 |
| NM_027117    | 14  | 18  | 47   | 26   | Gnptab        | chr1 | 5204  | 87909758  | 0.947901 | 0.615 | 0.644 |
| NM_026516    | 36  | 34  | 125  | 89   | Slc25a3       | chr1 | 1512  | 90580853  | 0.947901 | 0.554 | 0.584 |
| NM_026545    | 18  | 9   | 200  | 357  | Metap2        | chr1 | 4990  | 93353945  | 0.450833 | 0.451 | 0.359 |
| NM_022004    | 202 | 164 | 174  | 192  | Ndufa12       | chr1 | 561   | 93666070  | 0.405723 | 0.584 | 0.475 |
| NM_001037758 | 22  | 15  | 1709 | 1468 | D10Erttd322e  | chr1 | 666   | 94963110  | 0.947901 | 0.536 | 0.538 |
| NM_027671    | 34  | 4   | 44   | 25   | Ube2n         | chr1 | 3851  | 95006417  | 0.805861 | 0.535 | 0.638 |
| NM_148938    | 87  | 72  | 78   | 73   | Nudt4         | chr1 | 2929  | 95015165  | 0.805861 | 0.609 | 0.517 |
| NM_011625    | 69  | 66  | 12   | 13   | Atp2b1        | chr1 | 4760  | 98478131  | 0.883593 | 0.59  | 0.48  |
| NM_019648    | 69  | 84  | 27   | 13   | Slc6a15       | chr1 | 3642  | 102880726 | 0.947901 | 0.648 | 0.675 |
| NM_008791    | 49  | 28  | 18   | 9    | Ccdc59        | chr1 | 1078  | 105284275 | 0.670341 | 0.462 | 0.667 |
| NM_025391    | 18  | 10  | 89   | 53   | Nap1l1        | chr1 | 3927  | 110933474 | 0.947901 | 0.648 | 0.627 |
| NM_178227    | 47  | 64  | 50   | 36   | Krr1          | chr1 | 3555  | 111422428 | 0.947901 | 0.618 | 0.581 |
| NM_021896    | 50  | 53  | 128  | 69   | 4921506J03Rik | chr1 | 3607  | 112362814 | 0.601949 | 0.577 | 0.65  |
| NM_026850    | 93  | 67  | 66   | 43   | Cct2          | chr1 | 1962  | 116499115 | 0.947901 | 0.604 | 0.606 |
| NM_011780    | 43  | 28  | 50   | 34   | Tmem5         | chr1 | 1393  | 121526086 | 0.947901 | 0.659 | 0.595 |
| NM_001081188 | 76  | 56  | 29   | 38   | Al851790      | chr1 | 4153  | 123175995 | 0.783653 | 0.536 | 0.433 |
| NM_015729    | 28  | 22  | 25   | 20   | Ctdsp2        | chr1 | 4136  | 126436826 | 0.806039 | 0.4   | 0.556 |
| NM_024191    | 69  | 23  | 27   | 33   | Cdk4          | chr1 | 1365  | 126504092 | 0.947901 | 0.484 | 0.45  |
| NM_013540    | 88  | 77  | 22   | 12   | Tspan31       | chr1 | 1543  | 126505349 | 0.853013 | 0.762 | 0.647 |
| NM_010307    | 119 | 94  | 240  | 142  | Kif5a         | chr1 | 6015  | 126685098 | 0.851121 | 0.589 | 0.628 |
| NM_011595    | 9   | 20  | 19   | 15   | Shmt2         | chr1 | 2280  | 126954766 | 0.947901 | 0.529 | 0.559 |
| NM_001004143 | 88  | 72  | 80   | 71   | Tmem4         | chr1 | 1017  | 127763251 | 0.947901 | 0.472 | 0.53  |
| NM_010075    | 60  | 45  | 52   | 42   | Pa2g4         | chr1 | 2432  | 127994904 | 0.947901 | 0.5   | 0.553 |
| NM_007465    | 19  | 11  | 35   | 37   | Dnajc14       | chr1 | 4230  | 128255928 | 0.915297 | 0.389 | 0.486 |
| NM_133907    | 90  | 83  | 92   | 100  | 1110005A23Rik | chr1 | 893   | 128283624 | 0.896733 | 0.541 | 0.479 |
| NM_001039368 | 79  | 43  | 163  | 165  | Bloc1s1       | chr1 | 550   | 128356995 | 0.947901 | 0.49  | 0.497 |
| NM_027189    | 47  | 64  | 126  | 151  | Adcy1         | chr1 | 12259 | 7060286   | 0.780086 | 0.518 | 0.455 |
| NM_145371    | 57  | 57  | 38   | 26   | Vstm2         | chr1 | 3229  | 16182547  | 0.947901 | 0.515 | 0.594 |
| NM_026921    | 47  | 45  | 131  | 145  | 1500041B16Rik | chr1 | 1569  | 16978486  | 0.947901 | 0.511 | 0.475 |
| NM_008628    | 27  | 25  | 102  | 35   | Actr2         | chr1 | 3659  | 19994389  | 0.947901 | 0.758 | 0.745 |
| NM_133872    | 45  | 44  | 35   | 28   | Rab1          | chr1 | 2657  | 20124770  | 0.679858 | 0.696 | 0.556 |
| NM_178055    | 129 | 161 | 55   | 31   | Slc1a4        | chr1 | 3885  | 20213948  | 0.947901 | 0.609 | 0.64  |
| NM_028248    | 23  | 29  | 202  | 158  | Mdh1          | chr1 | 1758  | 21464206  | 0.844976 | 0.608 | 0.561 |
| NM_011670    | 285 | 303 | 25   | 18   | Spnb2         | chr1 | 9049  | 30054247  | 0.798753 | 0.453 | 0.581 |
| NM_001039466 | 34  | 34  | 386  | 280  | Nsg2          | chr1 | 2243  | 31958778  | 0.947901 | 0.561 | 0.58  |
| NM_145558    | 21  | 33  | 20   | 24   | Kcnip1        | chr1 | 1783  | 33545623  | 0.677707 | 0.595 | 0.455 |
| NM_080837    | 16  | 30  | 159  | 125  | Pttg1         | chr1 | 1683  | 43239116  | 0.076793 | 0.419 | 0.56  |
| NM_001033474 | 278 | 204 | 13   | 15   | Ublcp1        | chr1 | 2051  | 44279510  | 0.947901 | 0.444 | 0.464 |
| NM_001005868 | 28  | 16  | 56   | 74   | Lsm11         | chr1 | 6453  | 45746078  | 0.947901 | 0.45  | 0.431 |
| NM_026879    | 50  | 61  | 11   | 14   | Cyfp2         | chr1 | 6352  | 46093543  | 0.947901 | 0.413 | 0.44  |
| NM_026145    | 13  | 25  | 21   | 24   | Gnb2l1        | chr1 | 1254  | 48619668  | 0.947901 | 0.5   | 0.467 |
| NM_029759    | 29  | 41  | 69   | 52   | Mapk9         | chr1 | 4356  | 49696910  | 0.947901 | 0.58  | 0.57  |
| NM_172430    | 29  | 16  | 18   | 11   | Rasgef1c      | chr1 | 2248  | 49793052  | 0.805861 | 0.489 | 0.621 |
| NM_138748    | 78  | 45  | 26   | 36   | Sqstm1        | chr1 | 2000  | 50013792  | 0.947901 | 0.475 | 0.419 |
| NM_024258    | 6   | 24  | 67   | 33   | Zfp354c       | chr1 | 5367  | 50629149  | 0.863684 | 0.6   | 0.67  |
| NM_029979    | 113 | 58  | 96   | 107  | 0610009B22Rik | chr1 | 795   | 51502066  | 0.866345 | 0.515 | 0.473 |

|              |     |     |      |                  |      |       |          |          |       |       |
|--------------|-----|-----|------|------------------|------|-------|----------|----------|-------|-------|
| NM_008862    | 24  | 30  | 45   | 32 D11Ert497e    | chr1 | 1853  | 51790270 | 0.947901 | 0.535 | 0.584 |
| NM_015827    | 11  | 16  | 58   | 58 Ube2b         | chr1 | 1630  | 51799366 | 0.915297 | 0.419 | 0.5   |
| NM_197985    | 19  | 15  | 117  | 72 Vdac1         | chr1 | 1766  | 52202655 | 0.690932 | 0.527 | 0.619 |
| NM_021388    | 23  | 27  | 33   | 36 9530068E07Rik | chr1 | 2467  | 52221577 | 0.933057 | 0.544 | 0.478 |
| NM_134054    | 40  | 15  | 23   | 23 Rapgef6       | chr1 | 8212  | 54511251 | 0.836801 | 0.633 | 0.5   |
| NM_001025612 | 51  | 47  | 61   | 43 Cdc42se2      | chr1 | 2985  | 54569915 | 0.641017 | 0.463 | 0.587 |
| NM_173865    | 35  | 18  | 18   | 15 Anxa6         | chr1 | 2661  | 54825227 | 0.947901 | 0.563 | 0.545 |
| NM_011149    | 51  | 47  | 164  | 152 Sparc        | chr1 | 2299  | 55212138 | 0.633314 | 0.59  | 0.519 |
| NM_018796    | 154 | 91  | 40   | 28 Atox1         | chr1 | 501   | 55263977 | 0.555395 | 0.405 | 0.588 |
| NM_009720    | 17  | 25  | 20   | 13 G3bp1         | chr1 | 2685  | 55313186 | 0.947901 | 0.519 | 0.606 |
| NM_144525    | 23  | 11  | 23   | 21 Cops3         | chr1 | 1583  | 59650473 | 0.947901 | 0.6   | 0.523 |
| NM_026932    | 194 | 375 | 120  | 62 Usp22         | chr1 | 4280  | 60977268 | 0.457616 | 0.55  | 0.659 |
| NM_177167    | 43  | 31  | 29   | 30 Aldh3a2       | chr1 | 3131  | 61075732 | 0.947901 | 0.538 | 0.492 |
| NM_007510    | 270 | 223 | 16   | 20 Epn2          | chr1 | 4209  | 61359731 | 0.817221 | 0.567 | 0.444 |
| NM_024256    | 33  | 13  | 26   | 18 Prpsap2       | chr1 | 1857  | 61543259 | 0.80737  | 0.493 | 0.591 |
| NM_176930    | 18  | 18  | 36   | 22 Ttc19         | chr1 | 3419  | 62128125 | 0.947901 | 0.643 | 0.621 |
| NM_029293    | 84  | 66  | 68   | 19 Zfp287        | chr1 | 5021  | 62542211 | 0.947901 | 0.771 | 0.782 |
| NM_181400    | 44  | 58  | 45   | 22 AU040829      | chr1 | 4099  | 64880584 | 0.947901 | 0.685 | 0.672 |
| NM_008980    | 48  | 36  | 22   | 19 Map2k4        | chr1 | 3694  | 65569809 | 0.947901 | 0.564 | 0.537 |
| NM_025597    | 48  | 30  | 89   | 112 Trappc1      | chr1 | 745   | 69139248 | 0.947901 | 0.413 | 0.443 |
| NM_207205    | 63  | 23  | 41   | 67 Nlgn2         | chr1 | 5034  | 69640383 | 0.844976 | 0.457 | 0.38  |
| NM_016892    | 252 | 357 | 1032 | 825 Psmb6        | chr1 | 798   | 70340749 | 0.481745 | 0.523 | 0.556 |
| NM_133955    | 24  | 40  | 7    | 23 Spag7         | chr1 | 1017  | 70477602 | 0.846223 | 0.359 | 0.233 |
| NM_001081109 | 16  | 16  | 28   | 14 4933427D14Rik | chr1 | 4332  | 72011984 | 0.947901 | 0.667 | 0.667 |
| NM_009120    | 24  | 37  | 36   | 15 Med31         | chr1 | 1179  | 72028485 | 0.947901 | 0.747 | 0.706 |
| NM_021336    | 35  | 31  | 29   | 37 Pafah1b1      | chr1 | 5831  | 74512912 | 0.947901 | 0.483 | 0.439 |
| NM_030254    | 28  | 25  | 40   | 34 Tsr1          | chr1 | 3395  | 74720883 | 0.947901 | 0.525 | 0.541 |
| NM_026058    | 24  | 8   | 38   | 36 Srr           | chr1 | 3168  | 74723217 | 0.947901 | 0.515 | 0.514 |
| NM_007505    | 87  | 71  | 99   | 78 Crk           | chr1 | 3620  | 75519415 | 0.838727 | 0.68  | 0.559 |
| NM_025797    | 58  | 51  | 29   | 22 Blmh          | chr1 | 2240  | 76800051 | 0.947901 | 0.517 | 0.569 |
| NM_198831    | 39  | 28  | 76   | 45 Taok1         | chr1 | 12411 | 77373322 | 0.947901 | 0.598 | 0.628 |
| NM_025381    | 49  | 64  | 46   | 40 Sdf2          | chr1 | 1300  | 78068469 | 0.947901 | 0.562 | 0.535 |
| NM_133807    | 40  | 31  | 56   | 9 Nf1            | chr1 | 11847 | 79392761 | 0.144447 | 0.606 | 0.862 |
| NM_028659    | 34  | 34  | 13   | 20 Lig3          | chr1 | 5945  | 82615342 | 0.947901 | 0.438 | 0.394 |
| NM_019774    | 30  | 32  | 22   | 30 Ap2b1         | chr1 | 5411  | 83183224 | 0.721145 | 0.554 | 0.423 |
| NM_027231    | 115 | 89  | 28   | 15 Tada2l        | chr1 | 2119  | 83923509 | 0.160657 | 0.418 | 0.651 |
| NM_026498    | 81  | 42  | 17   | 21 Acaca         | chr1 | 9054  | 84213407 | 0.947901 | 0.5   | 0.447 |
| NM_011350    | 16  | 15  | 19   | 26 Znhit3        | chr1 | 983   | 84727762 | 0.243569 | 0.652 | 0.422 |
| NM_010418    | 20  | 24  | 26   | 30 Tmem49        | chr1 | 2773  | 86457063 | 0.853013 | 0.593 | 0.464 |
| NM_178705    | 19  | 23  | 50   | 54 Cltc          | chr1 | 6178  | 86570753 | 0.947901 | 0.512 | 0.481 |
| NM_019675    | 112 | 92  | 66   | 70 Gdpd1         | chr1 | 2326  | 86887360 | 0.657386 | 0.598 | 0.485 |
| NM_199011    | 10  | 16  | 162  | 85 Trim37        | chr1 | 5649  | 87031855 | 0.523991 | 0.565 | 0.656 |
| NM_016738    | 48  | 30  | 55   | 70 Ppm1e         | chr1 | 6315  | 87057798 | 0.525209 | 0.581 | 0.44  |
| NM_026420    | 282 | 248 | 17   | 30 Sfrs1         | chr1 | 5066  | 87865975 | 0.724838 | 0.533 | 0.362 |
| NM_007604    | 42  | 39  | 18   | 18 Mrps23        | chr1 | 1302  | 88023623 | 0.947901 | 0.52  | 0.5   |
| NM_007743    | 20  | 26  | 232  | 171 Nme1         | chr1 | 1235  | 93829589 | 0.915297 | 0.53  | 0.576 |
| NM_025338    | 122 | 113 | 47   | 68 Lrrc59        | chr1 | 2810  | 94504612 | 0.459791 | 0.563 | 0.409 |
| NM_018753    | 150 | 58  | 308  | 426 Atp5g1       | chr1 | 4675  | 95936305 | 0.805861 | 0.457 | 0.42  |
| NM_019640    | 32  | 46  | 58   | 58 Kpnb1         | chr1 | 5909  | 97041884 | 0.947901 | 0.474 | 0.5   |
| NM_025816    | 106 | 52  | 22   | 21 Lasp1         | chr1 | 3433  | 97698195 | 0.947901 | 0.588 | 0.512 |
| NM_133740    | 15  | 11  | 28   | 6 Igfbp4         | chr1 | 2069  | 98913100 | 0.222809 | 0.517 | 0.824 |
| NM_028020    | 19  | 16  | 43   | 12 Smarce1       | chr1 | 2960  | 99091724 | 0.947901 | 0.717 | 0.782 |



|              |      |     |      |                   |      |      |           |          |       |       |
|--------------|------|-----|------|-------------------|------|------|-----------|----------|-------|-------|
| NM_133797    | 10   | 17  | 63   | 34 Hap1           | chr1 | 3651 | 100215644 | 0.947901 | 0.571 | 0.649 |
| NM_018814    | 59   | 19  | 54   | 33 Cnp            | chr1 | 2283 | 100441903 | 0.947901 | 0.667 | 0.621 |
| NM_146121    | 20   | 15  | 16   | 15 Nkiras2        | chr1 | 2013 | 100487358 | 0.947901 | 0.483 | 0.516 |
| NM_021608    | 123  | 118 | 19   | 19 Tubg1          | chr1 | 1609 | 100987411 | 0.665043 | 0.333 | 0.5   |
| NM_201638    | 46   | 29  | 89   | 60 Rpl27          | chr1 | 536  | 101304056 | 0.945732 | 0.556 | 0.597 |
| NM_178709    | 28   | 28  | 124  | 100 Nbr1          | chr1 | 4444 | 101441923 | 0.677707 | 0.473 | 0.554 |
| NM_145380    | 61   | 45  | 72   | 67 Mpp3           | chr1 | 2860 | 101886463 | 0.780488 | 0.434 | 0.518 |
| NM_011434    | 229  | 52  | 44   | 18 Eftud2         | chr1 | 3397 | 102709280 | 0.947901 | 0.645 | 0.71  |
| NM_008943    | 146  | 97  | 10   | 17 Nmt1           | chr1 | 1838 | 102927122 | 0.677707 | 0.586 | 0.37  |
| NM_021316    | 23   | 25  | 41   | 34 Gosr2          | chr1 | 3082 | 103558979 | 0.947901 | 0.61  | 0.547 |
| NM_172892    | 23   | 5   | 19   | 14 Nsf            | chr1 | 3766 | 103744107 | 0.947901 | 0.654 | 0.576 |
| NM_026828    | 29   | 12  | 51   | 29 Mapt           | chr1 | 5213 | 104189417 | 0.395208 | 0.791 | 0.638 |
| NM_080640    | 30   | 16  | 18   | 11 Cyb561         | chr1 | 2474 | 105795041 | 0.947901 | 0.519 | 0.621 |
| NM_008229    | 21   | 21  | 58   | 49 Wdr68          | chr1 | 5765 | 105919448 | 0.947901 | 0.584 | 0.542 |
| NM_010443    | 12   | 18  | 30   | 23 Ccdc47         | chr1 | 3270 | 106077483 | 0.947901 | 0.622 | 0.566 |
| NM_145760    | 16   | 11  | 56   | 30 Psmc5          | chr1 | 1277 | 106122967 | 0.947901 | 0.661 | 0.651 |
| NM_027098    | 214  | 106 | 37   | 34 Psmc12         | chr1 | 1723 | 107359320 | 0.80737  | 0.655 | 0.521 |
| NM_053197    | 27   | 23  | 90   | 50 Prkar1a        | chr1 | 3323 | 109524418 | 0.805861 | 0.566 | 0.643 |
| NM_001024853 | 23   | 20  | 47   | 23 Cog1           | chr1 | 3060 | 113522262 | 0.311611 | 0.4   | 0.671 |
| NM_197987    | 105  | 81  | 52   | 38 D11Wsu99e      | chr1 | 2635 | 113522791 | 0.857111 | 0.475 | 0.578 |
| NM_008946    | 1040 | 947 | 34   | 110 Ttyh2         | chr1 | 3456 | 114581941 | 0.677707 | 0.356 | 0.236 |
| NM_010269    | 16   | 22  | 29   | 18 Slc9a3r1       | chr1 | 1922 | 115042086 | 0.947901 | 0.578 | 0.617 |
| NM_145142    | 114  | 131 | 47   | 14 C630004H02Rik  | chr1 | 3237 | 115222986 | 0.947901 | 0.83  | 0.77  |
| NM_017393    | 41   | 49  | 39   | 11 Acox1          | chr1 | 4065 | 116060090 | 0.379948 | 0.56  | 0.78  |
| NM_001081249 | 19   | 10  | 26   | 10 Srp68          | chr1 | 2546 | 116126782 | 0.947901 | 0.655 | 0.722 |
| NM_008634    | 101  | 64  | 42   | 11 Exoc7          | chr1 | 2094 | 116166339 | 0.710344 | 0.649 | 0.792 |
| NM_024189    | 25   | 48  | 31   | 32 Birc5          | chr1 | 977  | 117716699 | 0.947901 | 0.516 | 0.492 |
| NM_029711    | 99   | 89  | 36   | 38 Eif4a3         | chr1 | 1489 | 119161316 | 0.909313 | 0.413 | 0.486 |
| NM_018757    | 94   | 30  | 55   | 73 Mrpl12         | chr1 | 963  | 120349497 | 0.807174 | 0.526 | 0.43  |
| NM_080635    | 31   | 19  | 19   | 18 Anapc11        | chr1 | 3213 | 120466849 | 0.931904 | 0.412 | 0.514 |
| NM_009679    | 34   | 19  | 16   | 16 Foxk2          | chr1 | 5362 | 121168170 | 0.947901 | 0.462 | 0.5   |
| NM_134115    | 31   | 21  | 123  | 97 Dnmt3a         | chr1 | 5424 | 3911461   | 0.947901 | 0.555 | 0.559 |
| NM_025378    | 38   | 25  | 118  | 129 C030014M07Rik | chr1 | 6547 | 3999711   | 0.947901 | 0.461 | 0.478 |
| NM_177474    | 32   | 12  | 7    | 19 C330021A05Rik  | chr1 | 4695 | 4103107   | 0.811974 | 0.429 | 0.269 |
| NM_022992    | 20   | 24  | 15   | 36 1110057K04Rik  | chr1 | 2714 | 8234045   | 0.246799 | 0.532 | 0.294 |
| NM_178600    | 56   | 33  | 86   | 88 Laptm4a        | chr1 | 2130 | 8945413   | 0.805861 | 0.605 | 0.494 |
| NM_018829    | 19   | 12  | 75   | 125 Vsnl1         | chr1 | 1889 | 11338831  | 0.947901 | 0.438 | 0.375 |
| NM_001025264 | 27   | 27  | 123  | 86 D12Erd553e     | chr1 | 4781 | 12380934  | 0.783653 | 0.523 | 0.589 |
| NM_175102    | 77   | 38  | 34   | 32 Ddx1           | chr1 | 2488 | 13251777  | 0.947901 | 0.526 | 0.515 |
| NM_009242    | 148  | 103 | 63   | 29 AW125753       | chr1 | 3402 | 14154510  | 0.947901 | 0.607 | 0.685 |
| NM_007907    | 394  | 322 | 42   | 22 Pdia6          | chr1 | 2125 | 17290792  | 0.86501  | 0.558 | 0.656 |
| NM_030743    | 92   | 74  | 29   | 30 Itgb1bp1       | chr1 | 1874 | 21292007  | 0.947901 | 0.519 | 0.492 |
| NM_026812    | 81   | 65  | 54   | 62 Iah1           | chr1 | 941  | 21329257  | 0.947901 | 0.447 | 0.466 |
| NM_001081210 | 21   | 7   | 20   | 27 Adam17         | chr1 | 4410 | 21379212  | 0.947901 | 0.5   | 0.426 |
| NM_029810    | 36   | 18  | 199  | 218 C330002119Rik | chr1 | 7402 | 25701798  | 0.947901 | 0.451 | 0.477 |
| NM_134024    | 20   | 40  | 106  | 157 Rps7          | chr1 | 682  | 29320305  | 0.947901 | 0.404 | 0.403 |
| NM_030886    | 26   | 19  | 15   | 19 Ttc15          | chr1 | 2966 | 29435153  | 0.947901 | 0.5   | 0.441 |
| NM_011520    | 51   | 43  | 19   | 22 Tssc1          | chr1 | 1683 | 29436741  | 0.92262  | 0.561 | 0.463 |
| NM_134084    | 56   | 22  | 1236 | 1382 Dld          | chr1 | 2258 | 32034478  | 0.947901 | 0.452 | 0.472 |
| NM_146141    | 84   | 65  | 26   | 16 Pbef1          | chr1 | 2664 | 33536116  | 0.947901 | 0.695 | 0.619 |
| NM_011890    | 12   | 15  | 430  | 329 Ankmy2        | chr1 | 2380 | 36903189  | 0.947901 | 0.559 | 0.567 |
| NM_001038613 | 49   | 54  | 29   | 23 Etv1           | chr1 | 4067 | 39592392  | 0.947901 | 0.625 | 0.558 |

|              |      |      |     |     |               |      |       |           |          |       |       |
|--------------|------|------|-----|-----|---------------|------|-------|-----------|----------|-------|-------|
| NM_009608    | 0    | 46   | 25  | 26  | Lrrn3         | chr1 | 3238  | 42178370  | 0.853013 | 0.584 | 0.49  |
| NM_144512    | 34   | 12   | 181 | 97  | Nrcam         | chr1 | 4484  | 45488926  | 0.601938 | 0.5   | 0.651 |
| NM_016792    | 17   | 15   | 50  | 25  | Akap6         | chr1 | 10263 | 53896849  | 0.947901 | 0.686 | 0.667 |
| NM_031869    | 21   | 15   | 138 | 98  | 1110002B05Rik | chr1 | 1363  | 55746554  | 0.509331 | 0.727 | 0.585 |
| NM_026082    | 26   | 21   | 99  | 265 | Cfl2          | chr1 | 2940  | 55959937  | 0.844976 | 0.364 | 0.272 |
| NM_017392    | 19   | 14   | 24  | 10  | Brms1l        | chr1 | 2566  | 56969415  | 0.941581 | 0.6   | 0.706 |
| NM_175172    | 64   | 68   | 36  | 43  | Trappc6b      | chr1 | 1272  | 60149122  | 0.853013 | 0.532 | 0.456 |
| NM_054093    | 45   | 21   | 69  | 84  | Fkbp3         | chr1 | 945   | 66170028  | 0.947901 | 0.47  | 0.451 |
| NM_025638    | 52   | 35   | 187 | 175 | Rps29         | chr1 | 271   | 70258758  | 0.947901 | 0.52  | 0.517 |
| NM_001024508 | 69   | 85   | 37  | 18  | Klhdc2        | chr1 | 1637  | 70410995  | 0.419101 | 0.438 | 0.673 |
| NM_178602    | 32   | 28   | 36  | 32  | Sdccag1       | chr1 | 3720  | 70421401  | 0.947901 | 0.488 | 0.529 |
| NM_025455    | 481  | 408  | 1   | 31  | Pygl          | chr1 | 2780  | 71323830  | 0.941158 | 0.075 | 0.031 |
| NM_172468    | 38   | 29   | 42  | 45  | Psma3         | chr1 | 1348  | 72085560  | 0.947901 | 0.463 | 0.483 |
| NM_010240    | 301  | 96   | 37  | 13  | Timm9         | chr1 | 997   | 72237606  | 0.459791 | 0.535 | 0.74  |
| NM_025868    | 47   | 43   | 69  | 36  | Daam1         | chr1 | 6004  | 72996819  | 0.783653 | 0.552 | 0.657 |
| NM_008112    | 52   | 25   | 39  | 52  | Ppm1a         | chr1 | 2033  | 73895240  | 0.947901 | 0.481 | 0.429 |
| NM_025602    | 18   | 21   | 73  | 77  | Syt16         | chr1 | 2705  | 75367764  | 0.947901 | 0.514 | 0.487 |
| NM_177763    | 90   | 61   | 130 | 101 | Atp6v1d       | chr1 | 1410  | 79944043  | 0.853013 | 0.494 | 0.563 |
| NM_009786    | 90   | 74   | 51  | 38  | 6330442E10Rik | chr1 | 3880  | 80078765  | 0.947901 | 0.604 | 0.573 |
| NM_011341    | 35   | 19   | 67  | 40  | Pcnx          | chr1 | 12139 | 83096092  | 0.540466 | 0.756 | 0.626 |
| NM_001081324 | 103  | 84   | 43  | 47  | Psen1         | chr1 | 3023  | 85075188  | 0.479272 | 0.601 | 0.478 |
| NM_026329    | 1610 | 1483 | 47  | 34  | Npc2          | chr1 | 3278  | 86113860  | 0.947901 | 0.61  | 0.58  |
| NM_016669    | 38   | 28   | 56  | 39  | Fcf1          | chr1 | 730   | 86321471  | 0.427963 | 0.445 | 0.589 |
| NM_010329    | 43   | 48   | 32  | 12  | Dlst          | chr1 | 2726  | 86473724  | 0.945228 | 0.66  | 0.727 |
| NM_078479    | 34   | 49   | 18  | 9   | Nek9          | chr1 | 5403  | 86649812  | 0.805861 | 0.481 | 0.667 |
| NM_029632    | 20   | 21   | 18  | 15  | 0610007P14Rik | chr1 | 1185  | 87163120  | 0.947901 | 0.485 | 0.545 |
| NM_009722    | 24   | 22   | 42  | 47  | 1700019E19Rik | chr1 | 773   | 87423580  | 0.947901 | 0.468 | 0.472 |
| NM_133673    | 26   | 25   | 12  | 22  | Gstz1         | chr1 | 1656  | 88505234  | 0.710344 | 0.216 | 0.353 |
| NM_007386    | 32   | 12   | 28  | 30  | Ahsa1         | chr1 | 1330  | 88614134  | 0.947901 | 0.463 | 0.483 |
| NM_008047    | 54   | 41   | 40  | 18  | Adck1         | chr1 | 2287  | 89699661  | 0.459791 | 0.489 | 0.69  |
| NM_027432    | 99   | 40   | 91  | 62  | Sel1l         | chr1 | 6300  | 93080100  | 0.947901 | 0.598 | 0.595 |
| NM_018749    | 102  | 88   | 45  | 41  | Zc3h14        | chr1 | 3557  | 100025339 | 0.877763 | 0.444 | 0.523 |
| NM_008304    | 15   | 18   | 54  | 50  | Eml5          | chr1 | 10136 | 100125219 | 0.947901 | 0.528 | 0.519 |
| NM_177561    | 14   | 11   | 52  | 38  | Psmc1         | chr1 | 1502  | 101361279 | 0.947901 | 0.569 | 0.578 |
| NM_178626    | 37   | 43   | 54  | 25  | Cpsf2         | chr1 | 4840  | 103226871 | 0.947901 | 0.659 | 0.684 |
| NM_026644    | 29   | 45   | 106 | 70  | Ddx24         | chr1 | 3128  | 104663855 | 0.18768  | 0.465 | 0.602 |
| NM_145919    | 25   | 20   | 38  | 51  | Dicer1        | chr1 | 9851  | 105969324 | 0.947901 | 0.367 | 0.427 |
| NM_028343    | 21   | 19   | 26  | 33  | 2410024A21Rik | chr1 | 10173 | 106907477 | 0.945732 | 0.529 | 0.441 |
| NM_177356    | 29   | 10   | 20  | 19  | 4933433P14Rik | chr1 | 2787  | 106939081 | 0.92262  | 0.406 | 0.513 |
| NM_023908    | 19   | 15   | 43  | 28  | Papola        | chr1 | 4518  | 107075446 | 0.624131 | 0.444 | 0.606 |
| NM_019552    | 19   | 9    | 119 | 104 | Ppp2r5c       | chr1 | 2377  | 111809260 | 0.801072 | 0.597 | 0.534 |
| NM_078478    | 20   | 29   | 252 | 172 | Dync1h1       | chr1 | 14398 | 111903364 | 0.947901 | 0.588 | 0.594 |
| NM_008820    | 19   | 11   | 18  | 17  | Bag5          | chr1 | 1800  | 112948258 | 0.947901 | 0.591 | 0.514 |
| NM_011112    | 20   | 25   | 47  | 19  | 2810002N01Rik | chr1 | 1026  | 112971881 | 0.947901 | 0.765 | 0.712 |
| NM_009365    | 34   | 59   | 55  | 42  | Klc1          | chr1 | 2398  | 113032656 | 0.696682 | 0.466 | 0.567 |
| NM_007495    | 61   | 73   | 36  | 63  | Ppp1r13b      | chr1 | 4355  | 113104630 | 0.381503 | 0.511 | 0.364 |
| NM_008729    | 38   | 33   | 35  | 31  | Tmem179       | chr1 | 2373  | 113738969 | 0.86501  | 0.429 | 0.53  |
| NM_001081344 | 11   | 17   | 40  | 49  | AW555464      | chr1 | 6640  | 113981946 | 0.947901 | 0.395 | 0.449 |
| NM_008676    | 78   | 87   | 107 | 82  | Gdi2          | chr1 | 2681  | 3564670   | 0.653115 | 0.675 | 0.566 |
| NM_016857    | 24   | 13   | 53  | 45  | Pitrm1        | chr1 | 3547  | 6578692   | 0.947901 | 0.487 | 0.541 |
| NM_024465    | 29   | 136  | 205 | 179 | Pfkip         | chr1 | 3986  | 6647955   | 0.947901 | 0.556 | 0.534 |
| NM_001004363 | 19   | 22   | 28  | 14  | Gng4          | chr1 | 2976  | 13919840  | 0.947901 | 0.719 | 0.667 |

|              |     |     |     |      |               |      |       |           |          |       |       |
|--------------|-----|-----|-----|------|---------------|------|-------|-----------|----------|-------|-------|
| NM_027296    | 18  | 27  | 21  | 31   | Stard3nl      | chr1 | 1301  | 19468454  | 0.947901 | 0.345 | 0.404 |
| NM_025471    | 14  | 12  | 24  | 32   | Epdr1         | chr1 | 2362  | 19686355  | 0.255447 | 0.682 | 0.429 |
| NM_007478    | 69  | 55  | 65  | 99   | Them2         | chr1 | 686   | 24923211  | 0.118088 | 0.579 | 0.396 |
| NM_023211    | 184 | 242 | 81  | 46   | Nrsn1         | chr1 | 2103  | 25354226  | 0.805861 | 0.541 | 0.638 |
| NM_018769    | 15  | 10  | 81  | 18   | Tubb2a        | chr1 | 1615  | 34166215  | 0.947901 | 0.829 | 0.818 |
| NM_011660    | 15  | 22  | 499 | 206  | Tubb2b        | chr1 | 1922  | 34218890  | 0.947901 | 0.703 | 0.708 |
| NM_011185    | 202 | 200 | 18  | 70   | Riok1         | chr1 | 2435  | 38152800  | 0.677707 | 0.322 | 0.205 |
| NM_025409    | 18  | 21  | 33  | 42   | Txndc5        | chr1 | 2639  | 38598824  | 0.947901 | 0.449 | 0.44  |
| NM_028392    | 28  | 35  | 49  | 34   | Phactr1       | chr1 | 3849  | 43230838  | 0.947901 | 0.6   | 0.59  |
| NM_011694    | 58  | 52  | 79  | 53   | Spin1         | chr1 | 4136  | 51245265  | 0.945732 | 0.655 | 0.598 |
| NM_019982    | 89  | 81  | 28  | 23   | Auh           | chr1 | 1345  | 52936267  | 0.687044 | 0.36  | 0.549 |
| NM_025826    | 18  | 21  | 12  | 13   | Nfil3         | chr1 | 2019  | 53062818  | 0.947901 | 0.556 | 0.48  |
| NM_021881    | 20  | 9   | 184 | 165  | Sfxn1         | chr1 | 2795  | 54201986  | 0.947901 | 0.54  | 0.527 |
| NM_007771    | 14  | 20  | 88  | 116  | Cplx2         | chr1 | 4925  | 54484462  | 0.431606 | 0.55  | 0.431 |
| NM_054046    | 37  | 38  | 66  | 37   | 4732471D19Rik | chr1 | 3244  | 54652041  | 0.927748 | 0.552 | 0.641 |
| NM_027398    | 72  | 49  | 74  | 57   | 4833439L19Rik | chr1 | 2624  | 54653819  | 0.562014 | 0.37  | 0.565 |
| NM_053273    | 16  | 29  | 16  | 24   | D13Wsu177e    | chr1 | 1734  | 54691028  | 0.784904 | 0.523 | 0.4   |
| NM_026246    | 15  | 22  | 78  | 56   | Higd2a        | chr1 | 613   | 54691609  | 0.86501  | 0.525 | 0.582 |
| NM_177235    | 39  | 35  | 19  | 22   | Tmed9         | chr1 | 1463  | 55698265  | 0.947901 | 0.497 | 0.463 |
| NM_177214    | 24  | 35  | 80  | 60   | Cam1          | chr1 | 1387  | 55733208  | 0.947901 | 0.636 | 0.571 |
| NM_133973    | 308 | 303 | 7   | 18   | H2afy         | chr1 | 1403  | 56197530  | 0.26307  | 0.621 | 0.28  |
| NM_175185    | 95  | 91  | 32  | 26   | Smad5         | chr1 | 6504  | 56842361  | 0.947901 | 0.553 | 0.552 |
| NM_024242    | 19  | 40  | 26  | 48   | Ubqln1        | chr1 | 2399  | 58284546  | 0.677707 | 0.454 | 0.351 |
| NM_021028    | 13  | 14  | 43  | 22   | Ntrk2         | chr1 | 7022  | 59036573  | 0.945732 | 0.581 | 0.662 |
| NM_134082    | 40  | 27  | 33  | 56   | Isca1         | chr1 | 1915  | 59857211  | 0.525209 | 0.511 | 0.371 |
| NM_198306    | 20  | 47  | 20  | 7    | Dapk1         | chr1 | 5903  | 60826720  | 0.947901 | 0.727 | 0.741 |
| NM_013648    | 23  | 9   | 14  | 16   | Ctsl          | chr1 | 1971  | 64470357  | 0.947901 | 0.419 | 0.467 |
| NM_023402    | 298 | 248 | 14  | 32   | Brd9          | chr1 | 2494  | 74097925  | 0.602323 | 0.448 | 0.304 |
| NM_010363    | 16  | 58  | 196 | 133  | Sdha          | chr1 | 2859  | 74482356  | 0.947901 | 0.581 | 0.596 |
| NM_019735    | 85  | 59  | 23  | 15   | Gpr98         | chr1 | 19328 | 81772010  | 0.261477 | 0.875 | 0.605 |
| NM_008450    | 69  | 79  | 201 | 154  | Cetn3         | chr1 | 1013  | 81935837  | 0.947901 | 0.525 | 0.566 |
| NM_008996    | 39  | 17  | 15  | 26   | Mef2c         | chr1 | 2430  | 83659478  | 0.807174 | 0.519 | 0.366 |
| NM_013685    | 33  | 41  | 39  | 39   | Ccnh          | chr1 | 1976  | 85352386  | 0.706186 | 0.375 | 0.5   |
| NM_027226    | 33  | 28  | 13  | 12   | Rasa1         | chr1 | 5101  | 85390066  | 0.947901 | 0.579 | 0.52  |
| NM_026842    | 119 | 143 | 926 | 1098 | Cox7c         | chr1 | 449   | 86184479  | 0.805861 | 0.385 | 0.458 |
| NM_026533    | 63  | 35  | 120 | 89   | Edil3         | chr1 | 5328  | 89459293  | 0.947901 | 0.573 | 0.574 |
| NM_019880    | 87  | 59  | 16  | 21   | Vcan          | chr1 | 12432 | 89842842  | 0.593057 | 0.655 | 0.432 |
| NM_029635    | 242 | 172 | 29  | 35   | Tmem167       | chr1 | 3144  | 90244666  | 0.947901 | 0.467 | 0.453 |
| NM_133718    | 18  | 11  | 108 | 80   | Ssbp2         | chr1 | 3866  | 91840309  | 0.947901 | 0.605 | 0.574 |
| NM_201226    | 25  | 24  | 14  | 13   | Zfyve16       | chr1 | 5451  | 93291202  | 0.947901 | 0.577 | 0.519 |
| NM_008707    | 17  | 12  | 17  | 18   | Lhfp12        | chr1 | 4348  | 94962697  | 0.673494 | 0.692 | 0.486 |
| NM_172860    | 33  | 15  | 17  | 9    | Ap3b1         | chr1 | 4020  | 95301986  | 0.947901 | 0.577 | 0.654 |
| NM_022319    | 73  | 59  | 19  | 11   | Wdr41         | chr1 | 3063  | 95791753  | 0.945732 | 0.531 | 0.633 |
| NM_153064    | 98  | 96  | 18  | 21   | Aggf1         | chr1 | 3213  | 96140733  | 0.812477 | 0.615 | 0.462 |
| NM_023243    | 27  | 45  | 114 | 86   | Hmgcr         | chr1 | 4444  | 97436099  | 0.947901 | 0.528 | 0.57  |
| NM_028190    | 18  | 11  | 42  | 18   | Hexb          | chr1 | 1750  | 97968061  | 0.838923 | 0.583 | 0.7   |
| NM_025516    | 86  | 102 | 196 | 232  | Enc1          | chr1 | 4695  | 98020510  | 0.947901 | 0.434 | 0.458 |
| NM_001003971 | 21  | 17  | 13  | 14   | Mrps27        | chr1 | 1849  | 100114821 | 0.947901 | 0.393 | 0.481 |
| NM_007615    | 20  | 11  | 16  | 21   | Mtap1b        | chr1 | 8818  | 100278136 | 0.487509 | 0.612 | 0.432 |
| NM_025511    | 70  | 73  | 13  | 17   | Pik3r1        | chr1 | 6915  | 102527846 | 0.947901 | 0.394 | 0.433 |
| NM_024432    | 101 | 85  | 37  | 43   | Sfrs12        | chr1 | 4063  | 104550669 | 0.866345 | 0.373 | 0.463 |
| NM_023514    | 33  | 31  | 19  | 25   | Erbp2ip       | chr1 | 6602  | 104679333 | 0.562731 | 0.636 | 0.432 |



|              |     |     |     |                  |      |       |           |          |       |       |
|--------------|-----|-----|-----|------------------|------|-------|-----------|----------|-------|-------|
| NM_172589    | 18  | 8   | 54  | 39 Nln           | chr1 | 3780  | 104862854 | 0.232461 | 0.727 | 0.581 |
| NM_013678    | 23  | 20  | 17  | 14 Ipo11         | chr1 | 4282  | 107715138 | 0.947901 | 0.556 | 0.548 |
| NM_016709    | 9   | 16  | 25  | 14 Dimt1         | chr1 | 2038  | 107747177 | 0.866442 | 0.517 | 0.641 |
| NM_026508    | 16  | 14  | 32  | 13 Gpbp1         | chr1 | 3451  | 112228252 | 0.749267 | 0.837 | 0.711 |
| NM_175036    | 49  | 25  | 27  | 24 Snag1         | chr1 | 4443  | 114382456 | 0.947901 | 0.464 | 0.529 |
| NM_025424    | 16  | 27  | 193 | 343 Ndufs4       | chr1 | 656   | 115178192 | 0.252235 | 0.506 | 0.36  |
| NM_145457    | 9   | 16  | 43  | 36 Paip1         | chr1 | 4668  | 120246571 | 0.677707 | 0.36  | 0.544 |
| NM_010097    | 58  | 60  | 49  | 22 4833420G17Rik | chr1 | 2637  | 120274565 | 0.947901 | 0.66  | 0.69  |
| NM_173374    | 16  | 14  | 56  | 36 Pdhb          | chr1 | 1485  | 9005290   | 0.405087 | 0.44  | 0.609 |
| NM_009030    | 17  | 9   | 68  | 47 Cadps         | chr1 | 5475  | 13383370  | 0.858255 | 0.508 | 0.591 |
| NM_177718    | 65  | 59  | 99  | 61 Synpr         | chr1 | 2541  | 14446849  | 0.947901 | 0.559 | 0.619 |
| NM_182841    | 26  | 14  | 51  | 42 Thoc7         | chr1 | 883   | 14783737  | 0.947901 | 0.552 | 0.548 |
| NM_001035854 | 46  | 37  | 54  | 135 Psmd6        | chr1 | 1313  | 14944742  | 0.108104 | 0.524 | 0.286 |
| NM_011490    | 38  | 31  | 14  | 17 Slc4a7        | chr1 | 7389  | 15628676  | 0.947901 | 0.56  | 0.452 |
| NM_010266    | 27  | 22  | 87  | 87 Top2b         | chr1 | 5652  | 17262893  | 0.947901 | 0.549 | 0.5   |
| NM_023374    | 384 | 309 | 62  | 37 Nkiras1       | chr1 | 4592  | 19116297  | 0.947901 | 0.608 | 0.626 |
| NM_026950    | 38  | 45  | 24  | 12 Ube2e2        | chr1 | 1410  | 19406582  | 0.947901 | 0.662 | 0.667 |
| NM_009696    | 31  | 29  | 46  | 57 Ap3m1         | chr1 | 3099  | 21854088  | 0.673494 | 0.613 | 0.447 |
| NM_175451    | 49  | 20  | 10  | 15 Polr3a        | chr1 | 4683  | 25284571  | 0.947901 | 0.448 | 0.4   |
| NM_011969    | 552 | 471 | 43  | 30 Ppif          | chr1 | 1560  | 26517801  | 0.641958 | 0.718 | 0.589 |
| NM_028487    | 36  | 7   | 42  | 35 Appl1         | chr1 | 6961  | 27771669  | 0.947901 | 0.532 | 0.545 |
| NM_009838    | 221 | 158 | 20  | 24 Erc2          | chr1 | 6083  | 28590239  | 0.823948 | 0.588 | 0.455 |
| NM_172396    | 36  | 85  | 84  | 61 Selk          | chr1 | 1018  | 30786565  | 0.805861 | 0.518 | 0.579 |
| NM_181405    | 8   | 17  | 21  | 19 Cacna1d       | chr1 | 8705  | 31304189  | 0.870979 | 0.417 | 0.525 |
| NM_027539    | 43  | 40  | 52  | 33 Glt8d1        | chr1 | 1758  | 31824693  | 0.947901 | 0.609 | 0.612 |
| NM_025855    | 18  | 14  | 65  | 20 Pbrm1         | chr1 | 8117  | 31933736  | 0.370167 | 0.616 | 0.765 |
| NM_026784    | 177 | 118 | 17  | 27 Nt5dc2        | chr1 | 1435  | 31952126  | 0.100058 | 0.677 | 0.386 |
| NM_152812    | 16  | 21  | 23  | 28 Stab1         | chr1 | 7995  | 31981608  | 0.828498 | 0.575 | 0.451 |
| NM_030561    | 12  | 22  | 99  | 54 Sh3bp5        | chr1 | 2487  | 32200914  | 0.770715 | 0.553 | 0.647 |
| NM_172525    | 18  | 8   | 31  | 34 Sncg          | chr1 | 726   | 35186537  | 0.947901 | 0.556 | 0.477 |
| NM_023565    | 53  | 57  | 45  | 36 Pcdh21        | chr1 | 4364  | 37911317  | 0.933287 | 0.645 | 0.556 |
| NM_009007    | 157 | 142 | 40  | 31 Ghitm         | chr1 | 2476  | 37946866  | 0.646096 | 0.408 | 0.563 |
| NM_011278    | 39  | 37  | 41  | 21 5730469M10Rik | chr1 | 1537  | 41827047  | 0.805861 | 0.52  | 0.661 |
| NM_026792    | 18  | 13  | 91  | 83 Ctsb          | chr1 | 4738  | 63741362  | 0.947901 | 0.493 | 0.523 |
| NM_021884    | 28  | 16  | 138 | 106 Elp3         | chr1 | 2722  | 66205113  | 0.37945  | 0.685 | 0.566 |
| NM_027166    | 52  | 52  | 33  | 27 Clu           | chr1 | 1669  | 66600370  | 0.947901 | 0.594 | 0.55  |
| NM_025944    | 28  | 26  | 67  | 55 Trim35        | chr1 | 3684  | 66928629  | 0.524573 | 0.661 | 0.549 |
| NM_027188    | 25  | 48  | 57  | 27 Stmn4         | chr1 | 1249  | 66980342  | 0.473107 | 0.549 | 0.679 |
| NM_016683    | 25  | 24  | 52  | 64 Pnma2         | chr1 | 4365  | 67538491  | 0.947901 | 0.474 | 0.448 |
| NM_025327    | 72  | 62  | 16  | 16 Bnip3l        | chr1 | 3237  | 67604148  | 0.947901 | 0.471 | 0.5   |
| NM_024472    | 16  | 20  | 11  | 17 Nefl          | chr1 | 2014  | 68705532  | 0.943216 | 0.5   | 0.393 |
| NM_024236    | 28  | 35  | 50  | 53 Nefm          | chr1 | 3244  | 68738571  | 0.947901 | 0.446 | 0.485 |
| NM_001080128 | 57  | 48  | 25  | 16 Xpo7          | chr1 | 15118 | 71103060  | 0.947901 | 0.677 | 0.61  |
| NM_146169    | 16  | 16  | 466 | 337 Itm2b        | chr1 | 1773  | 73768222  | 0.947901 | 0.557 | 0.58  |
| NM_133942    | 14  | 12  | 37  | 38 Med4          | chr1 | 1304  | 73918252  | 0.833193 | 0.593 | 0.493 |
| NM_172963    | 43  | 7   | 85  | 67 Sucla2        | chr1 | 2108  | 73995309  | 0.947901 | 0.551 | 0.559 |
| NM_009656    | 30  | 15  | 139 | 136 Esd          | chr1 | 1618  | 75149567  | 0.947901 | 0.522 | 0.505 |
| NM_013813    | 57  | 40  | 41  | 27 Cldn10        | chr1 | 1903  | 119272919 | 0.824752 | 0.5   | 0.603 |
| NM_009691    | 62  | 54  | 20  | 25 Farp1         | chr1 | 4857  | 121681742 | 0.677707 | 0.597 | 0.444 |
| NM_001038587 | 34  | 40  | 66  | 32 Dock9         | chr1 | 7910  | 122097626 | 0.817803 | 0.579 | 0.673 |
| NM_173876    | 20  | 11  | 42  | 23 Fgf14         | chr1 | 2831  | 124592006 | 0.947901 | 0.595 | 0.646 |
| NM_175095    | 67  | 42  | 141 | 137 Sepp1        | chr1 | 2030  | 3229130   | 0.947901 | 0.53  | 0.507 |

|              |     |     |     |     |               |      |      |          |          |       |       |
|--------------|-----|-----|-----|-----|---------------|------|------|----------|----------|-------|-------|
| NM_008142    | 105 | 74  | 82  | 118 | Rpl37         | chr1 | 835  | 5068591  | 0.066417 | 0.561 | 0.41  |
| NM_009199    | 37  | 20  | 477 | 266 | Slc1a3        | chr1 | 4147 | 8638333  | 0.37945  | 0.547 | 0.642 |
| NM_025665    | 21  | 24  | 31  | 31  | Bxdc2         | chr1 | 2654 | 10415550 | 0.947901 | 0.478 | 0.5   |
| NM_027530    | 101 | 94  | 111 | 66  | Sub1          | chr1 | 3321 | 11912621 | 0.199722 | 0.493 | 0.627 |
| NM_001009818 | 162 | 211 | 31  | 37  | Rnasen        | chr1 | 4185 | 12864879 | 0.947901 | 0.5   | 0.456 |
| NM_028814    | 31  | 14  | 85  | 44  | Ctnnd2        | chr1 | 5959 | 30599336 | 0.611248 | 0.535 | 0.659 |
| NM_028521    | 22  | 18  | 128 | 118 | Mar6          | chr1 | 6236 | 31408122 | 0.935791 | 0.444 | 0.52  |
| NM_025283    | 59  | 41  | 29  | 16  | Sdc2          | chr1 | 3313 | 32962720 | 0.646096 | 0.455 | 0.644 |
| NM_009128    | 241 | 236 | 361 | 616 | Cox6c         | chr1 | 527  | 35867036 | 0.392046 | 0.508 | 0.369 |
| NM_133900    | 18  | 16  | 266 | 228 | Polr2k        | chr1 | 619  | 36106551 | 0.405087 | 0.648 | 0.538 |
| NM_020582    | 625 | 662 | 222 | 267 | Zfp706        | chr1 | 4485 | 36928594 | 0.947901 | 0.422 | 0.454 |
| NM_177784    | 36  | 34  | 120 | 130 | Ncald         | chr1 | 3708 | 37301974 | 0.947901 | 0.503 | 0.48  |
| NM_001001986 | 9   | 25  | 61  | 35  | Azin1         | chr1 | 4868 | 38430125 | 0.947901 | 0.634 | 0.635 |
| NM_053078    | 105 | 98  | 16  | 20  | Baalc         | chr1 | 2524 | 38780711 | 0.543527 | 0.652 | 0.444 |
| NM_170669    | 47  | 39  | 52  | 41  | Eif3s6        | chr1 | 1541 | 43114203 | 0.947659 | 0.495 | 0.559 |
| NM_007863    | 53  | 69  | 19  | 14  | 5730410E15Rik | chr1 | 2948 | 44509092 | 0.947901 | 0.514 | 0.576 |
| NM_011894    | 42  | 34  | 71  | 82  | Eif3s3        | chr1 | 1254 | 51696911 | 0.525209 | 0.62  | 0.464 |
| NM_178605    | 58  | 53  | 87  | 65  | Rad21         | chr1 | 3405 | 51814081 | 0.947901 | 0.561 | 0.572 |
| NM_011722    | 67  | 44  | 65  | 54  | Enpp2         | chr1 | 3242 | 54751523 | 0.947901 | 0.6   | 0.546 |
| NM_026122    | 18  | 17  | 61  | 49  | Mrpl13        | chr1 | 786  | 55388852 | 0.947901 | 0.557 | 0.555 |
| NM_009273    | 18  | 21  | 59  | 35  | Tmem65        | chr1 | 3644 | 58620955 | 0.947901 | 0.582 | 0.628 |
| NM_019748    | 126 | 111 | 134 | 135 | Ndufb9        | chr1 | 651  | 58765388 | 0.339976 | 0.58  | 0.498 |
| NM_153535    | 16  | 22  | 59  | 72  | Sqle          | chr1 | 2748 | 59162397 | 0.783653 | 0.537 | 0.45  |
| NM_182807    | 60  | 52  | 80  | 47  | C920006C10Rik | chr1 | 5210 | 65702776 | 0.947901 | 0.674 | 0.63  |
| NM_031185    | 27  | 24  | 131 | 119 | Vps28         | chr1 | 885  | 76452699 | 0.947901 | 0.494 | 0.524 |
| NM_019716    | 60  | 52  | 131 | 58  | Txn2          | chr1 | 1282 | 77755066 | 0.065669 | 0.551 | 0.693 |
| NM_001009948 | 33  | 49  | 85  | 105 | Eif3s7        | chr1 | 1910 | 77792317 | 0.611248 | 0.537 | 0.447 |
| NM_009270    | 58  | 50  | 43  | 25  | Pdxp          | chr1 | 2018 | 78749729 | 0.947901 | 0.68  | 0.632 |
| NM_176832    | 20  | 26  | 33  | 25  | Nol12         | chr1 | 1993 | 78771594 | 0.947901 | 0.602 | 0.569 |
| NM_026102    | 32  | 26  | 70  | 51  | Eif3s6ip      | chr1 | 1893 | 78920100 | 0.947901 | 0.542 | 0.579 |
| NM_001033354 | 12  | 20  | 125 | 63  | Polr2f        | chr1 | 612  | 78982022 | 0.459791 | 0.564 | 0.665 |
| NM_007638    | 45  | 48  | 49  | 67  | Csnk1e        | chr1 | 2760 | 79256732 | 0.846223 | 0.495 | 0.422 |
| NM_010305    | 38  | 41  | 41  | 75  | Slc25a17      | chr1 | 1667 | 81159481 | 0.863684 | 0.44  | 0.353 |
| NM_009449    | 25  | 1   | 25  | 30  | Phf5a         | chr1 | 1648 | 81695700 | 0.947901 | 0.459 | 0.455 |
| NM_172633    | 46  | 26  | 27  | 22  | Aco2          | chr1 | 2785 | 81745078 | 0.947901 | 0.51  | 0.551 |
| NM_033560    | 27  | 26  | 60  | 44  | Pmm1          | chr1 | 1228 | 81788293 | 0.947901 | 0.622 | 0.577 |
| NM_027481    | 9   | 25  | 13  | 13  | Nhp2l1        | chr1 | 1257 | 81877989 | 0.947901 | 0.484 | 0.5   |
| NM_019806    | 9   | 26  | 81  | 75  | Sep3          | chr1 | 4731 | 82122589 | 0.947901 | 0.532 | 0.519 |
| NM_001033136 | 12  | 18  | 72  | 63  | 1500032L24Rik | chr1 | 608  | 82179305 | 0.947901 | 0.588 | 0.533 |
| NM_025606    | 23  | 17  | 48  | 28  | Ndufa6        | chr1 | 485  | 82180700 | 0.947901 | 0.6   | 0.632 |
| NM_010514    | 52  | 43  | 25  | 20  | Mcat          | chr1 | 1893 | 83379686 | 0.873506 | 0.68  | 0.556 |
| NM_011936    | 18  | 14  | 83  | 53  | Mpped1        | chr1 | 3255 | 83688445 | 0.947901 | 0.604 | 0.61  |
| NM_010209    | 29  | 26  | 31  | 28  | Sult4a1       | chr1 | 2446 | 83920396 | 0.947901 | 0.455 | 0.525 |
| NM_028146    | 56  | 28  | 45  | 24  | Ldoc1l        | chr1 | 4447 | 84383942 | 0.410704 | 0.493 | 0.652 |
| NM_007803    | 70  | 56  | 84  | 98  | Atxn10        | chr1 | 2425 | 85292811 | 0.947901 | 0.457 | 0.462 |
| NM_008227    | 24  | 7   | 52  | 55  | Yaf2          | chr1 | 2192 | 93114504 | 0.525209 | 0.342 | 0.486 |
| NM_207225    | 51  | 25  | 19  | 23  | Twf1          | chr1 | 2973 | 94416918 | 0.250288 | 0.717 | 0.452 |
| NM_010863    | 19  | 12  | 62  | 67  | Nell2         | chr1 | 3385 | 95177209 | 0.947901 | 0.456 | 0.481 |
| NM_029758    | 103 | 94  | 27  | 32  | Cacnb3        | chr1 | 2837 | 98474040 | 0.947901 | 0.491 | 0.458 |
| NM_009622    | 103 | 96  | 77  | 40  | Arf3          | chr1 | 3481 | 98569203 | 0.673494 | 0.556 | 0.658 |
| NM_021604    | 149 | 133 | 302 | 227 | Tuba1a        | chr1 | 1591 | 98780977 | 0.066417 | 0.652 | 0.571 |
| NM_009095    | 240 | 323 | 59  | 57  | Tegt          | chr1 | 2340 | 99238939 | 0.947901 | 0.543 | 0.509 |

|              |     |     |     |                  |      |      |           |          |       |       |
|--------------|-----|-----|-----|------------------|------|------|-----------|----------|-------|-------|
| NM_144522    | 13  | 16  | 20  | 15 Zfp740        | chr1 | 3760 | 102043161 | 0.947901 | 0.6   | 0.571 |
| NM_023173    | 22  | 6   | 37  | 56 Map3k12       | chr1 | 5158 | 102328421 | 0.947901 | 0.464 | 0.398 |
| NM_025898    | 24  | 31  | 72  | 90 Atp5g2        | chr1 | 647  | 102495502 | 0.900976 | 0.5   | 0.444 |
| NM_007834    | 46  | 29  | 20  | 7 Trap1          | chr1 | 2297 | 4045453   | 0.677707 | 0.533 | 0.741 |
| NM_053084    | 65  | 56  | 13  | 17 Coro7         | chr1 | 3518 | 4679607   | 0.947901 | 0.333 | 0.433 |
| NM_026558    | 41  | 14  | 17  | 9 Hmox2          | chr1 | 1255 | 4765850   | 0.540466 | 0.4   | 0.654 |
| NM_010324    | 28  | 18  | 65  | 40 5730403B10Rik | chr1 | 3898 | 4789870   | 0.863684 | 0.544 | 0.619 |
| NM_027204    | 30  | 27  | 22  | 21 Mgrn1         | chr1 | 3138 | 4937365   | 0.947901 | 0.531 | 0.512 |
| NM_031179    | 27  | 14  | 117 | 135 BC024814     | chr1 | 1347 | 8490209   | 0.947901 | 0.452 | 0.464 |
| NM_054102    | 17  | 29  | 26  | 26 Abat          | chr1 | 4593 | 8620756   | 0.86501  | 0.408 | 0.5   |
| NM_029721    | 150 | 136 | 39  | 37 Carhsp1       | chr1 | 2849 | 8663733   | 0.947901 | 0.473 | 0.513 |
| NM_001039522 | 28  | 12  | 31  | 58 Nubp1         | chr1 | 1276 | 10420363  | 0.139629 | 0.571 | 0.348 |
| NM_001081458 | 114 | 77  | 47  | 81 BC068110      | chr1 | 3321 | 10447095  | 0.189309 | 0.542 | 0.367 |
| NM_010233    | 24  | 17  | 169 | 126 Snn          | chr1 | 2919 | 11072688  | 0.947901 | 0.573 | 0.573 |
| NM_007488    | 135 | 222 | 54  | 13 Rsl1d1        | chr1 | 1839 | 11201396  | 0.347816 | 0.642 | 0.806 |
| NM_130884    | 113 | 151 | 23  | 18 Parn          | chr1 | 2902 | 13666013  | 0.863684 | 0.438 | 0.561 |
| NM_028782    | 30  | 35  | 40  | 2 Mpv17l         | chr1 | 3056 | 13948791  | 0.883593 | 0.889 | 0.952 |
| NM_023153    | 16  | 17  | 58  | 20 2900011O08Rik | chr1 | 2355 | 14100703  | 0.358439 | 0.549 | 0.744 |
| NM_144806    | 142 | 146 | 66  | 47 Ube2v2        | chr1 | 4179 | 15554767  | 0.947901 | 0.523 | 0.584 |
| NM_025849    | 15  | 21  | 13  | 80 2410018G20Rik | chr1 | 1010 | 15862547  | 0.179836 | 0.319 | 0.14  |
| NM_175145    | 29  | 25  | 43  | 47 Dnm1l         | chr1 | 4039 | 16346167  | 0.947901 | 0.5   | 0.478 |
| NM_016802    | 15  | 14  | 41  | 35 Ypel1         | chr1 | 2659 | 17084820  | 0.947901 | 0.517 | 0.539 |
| NM_001081306 | 23  | 20  | 26  | 27 Pcqap         | chr1 | 3383 | 17651422  | 0.945732 | 0.593 | 0.491 |
| NM_008492    | 268 | 173 | 27  | 19 Dgcr6         | chr1 | 1262 | 18071178  | 0.947901 | 0.559 | 0.587 |
| NM_146012    | 10  | 15  | 25  | 19 D16H22S680E   | chr1 | 1500 | 18310970  | 0.947901 | 0.512 | 0.568 |
| NM_007749    | 30  | 48  | 21  | 17 Lamp3         | chr1 | 3343 | 19706418  | 0.611248 | 0.744 | 0.553 |
| NM_019979    | 187 | 174 | 26  | 28 B3gnt5        | chr1 | 4098 | 19765204  | 0.947901 | 0.538 | 0.481 |
| NM_026391    | 53  | 43  | 46  | 71 Klhl24        | chr1 | 6683 | 20124587  | 0.933057 | 0.483 | 0.393 |
| NM_001077507 | 181 | 214 | 27  | 37 Eif2b5        | chr1 | 2579 | 20509255  | 0.833298 | 0.543 | 0.422 |
| NM_007520    | 14  | 14  | 24  | 29 Ap2m1         | chr1 | 2057 | 20541919  | 0.555395 | 0.642 | 0.453 |
| NM_009003    | 33  | 31  | 25  | 46 2510009E07Rik | chr1 | 5130 | 21650854  | 0.947901 | 0.347 | 0.352 |
| NM_138590    | 44  | 50  | 23  | 33 Senp2         | chr1 | 3109 | 22046915  | 0.947901 | 0.44  | 0.411 |
| NM_053092    | 29  | 17  | 26  | 16 Sst           | chr1 | 599  | 23890860  | 0.947901 | 0.605 | 0.619 |
| NM_183178    | 32  | 28  | 38  | 22 1600021P15Rik | chr1 | 3080 | 28826485  | 0.753949 | 0.524 | 0.633 |
| NM_008640    | 23  | 15  | 29  | 39 Tmem44        | chr1 | 4241 | 30547501  | 0.876897 | 0.505 | 0.426 |
| NM_011188    | 51  | 34  | 22  | 10 Pak2          | chr1 | 4135 | 32052464  | 0.945732 | 0.586 | 0.688 |
| NM_027722    | 39  | 25  | 24  | 10 Fbxo45        | chr1 | 4110 | 32238648  | 0.915297 | 0.605 | 0.706 |
| NM_009513    | 33  | 28  | 31  | 25 Tfrc          | chr1 | 4838 | 32630890  | 0.906185 | 0.65  | 0.554 |
| NM_007983    | 18  | 15  | 68  | 35 Fytd1         | chr1 | 4255 | 32906331  | 0.710344 | 0.541 | 0.66  |
| NM_153410    | 29  | 18  | 66  | 64 Snx4          | chr1 | 2442 | 33298656  | 0.947901 | 0.53  | 0.508 |
| NM_021880    | 69  | 53  | 17  | 22 Itgb5         | chr1 | 2981 | 33899464  | 0.945732 | 0.348 | 0.436 |
| NM_172652    | 58  | 30  | 17  | 16 Sec22a        | chr1 | 3992 | 35363943  | 0.947901 | 0.48  | 0.515 |
| NM_183270    | 23  | 21  | 90  | 42 Fstl1         | chr1 | 3609 | 37834047  | 0.602323 | 0.568 | 0.682 |
| NM_025282    | 14  | 13  | 31  | 51 Lrrc58        | chr1 | 8592 | 37886860  | 0.947901 | 0.442 | 0.378 |
| NM_001081394 | 9   | 20  | 79  | 13 Gsk3b         | chr1 | 8298 | 38243868  | 0.265596 | 0.685 | 0.859 |
| NM_029004    | 69  | 72  | 139 | 127 Adprh        | chr1 | 1583 | 38450274  | 0.947901 | 0.51  | 0.523 |
| NM_024178    | 49  | 61  | 23  | 19 Ktelc1        | chr1 | 2641 | 38529573  | 0.947901 | 0.614 | 0.548 |
| NM_026352    | 72  | 58  | 171 | 173 Atp6v1a      | chr1 | 3946 | 44114731  | 0.923252 | 0.545 | 0.497 |
| NM_010129    | 28  | 16  | 100 | 46 Senp7         | chr1 | 4802 | 56188519  | 0.706466 | 0.553 | 0.685 |
| NM_028018    | 48  | 35  | 16  | 20 Tbc1d23       | chr1 | 3664 | 57214376  | 0.450421 | 0.686 | 0.444 |
| NM_001083807 | 15  | 16  | 17  | 16 Arl6          | chr1 | 1326 | 59638805  | 0.947901 | 0.6   | 0.515 |
| NM_029406    | 24  | 34  | 19  | 6 Pros1          | chr1 | 3270 | 62927887  | 0.92262  | 0.853 | 0.76  |



|              |       |       |     |     |               |      |      |          |          |       |       |
|--------------|-------|-------|-----|-----|---------------|------|------|----------|----------|-------|-------|
| NM_027815    | 46    | 25    | 90  | 69  | Chmp2b        | chr1 | 1838 | 65562727 | 0.550672 | 0.45  | 0.566 |
| NM_001025438 | 25    | 11    | 177 | 88  | Robo1         | chr1 | 7568 | 73043375 | 0.352547 | 0.526 | 0.668 |
| NM_178939    | 114   | 62    | 31  | 17  | Robo2         | chr1 | 8047 | 74035238 | 0.947901 | 0.655 | 0.646 |
| NM_080560    | 38    | 33    | 469 | 379 | Cxadr         | chr1 | 5538 | 78338878 | 0.947901 | 0.537 | 0.553 |
| NM_009076    | 43    | 7     | 138 | 145 | App           | chr1 | 3140 | 85120940 | 0.947901 | 0.482 | 0.488 |
| NM_027464    | 13    | 12    | 21  | 30  | Usp16         | chr1 | 2862 | 87483225 | 0.523991 | 0.2   | 0.412 |
| NM_145138    | 13    | 14    | 161 | 122 | Cct8          | chr1 | 2391 | 87483797 | 0.891737 | 0.519 | 0.569 |
| NM_008054    | 38    | 39    | 32  | 56  | Bach1         | chr1 | 5858 | 87732866 | 0.805861 | 0.5   | 0.364 |
| NM_007506    | 212   | 252   | 81  | 30  | Sod1          | chr1 | 661  | 90224623 | 0.552476 | 0.815 | 0.73  |
| NM_025835    | 39    | 15    | 99  | 74  | Tmem50b       | chr1 | 2237 | 91580487 | 0.947901 | 0.537 | 0.572 |
| NM_018760    | 34    | 33    | 53  | 57  | Son           | chr1 | 8451 | 91677684 | 0.296511 | 0.698 | 0.482 |
| NM_016908    | 21    | 12    | 39  | 16  | Cbr1          | chr1 | 1081 | 93608095 | 0.947901 | 0.696 | 0.709 |
| NM_009260    | 29    | 35    | 305 | 145 | Ttc3          | chr1 | 7295 | 94645774 | 0.139629 | 0.575 | 0.678 |
| NM_010288    | 28    | 26    | 24  | 24  | Dscr3         | chr1 | 2419 | 94748021 | 0.805861 | 0.613 | 0.5   |
| NM_025894    | 19    | 10    | 76  | 28  | Wrb           | chr1 | 2483 | 96378872 | 0.947901 | 0.688 | 0.731 |
| NM_138656    | 20    | 28    | 207 | 212 | Pcp4          | chr1 | 669  | 96747211 | 0.352547 | 0.636 | 0.494 |
| NM_025304    | 45    | 48    | 16  | 42  | 5730437N04Rik | chr1 | 971  | 5439601  | 0.947901 | 0.308 | 0.276 |
| NM_011879    | 25    | 18    | 64  | 56  | Qk            | chr1 | 6887 | 10407408 | 0.710344 | 0.69  | 0.533 |
| NM_010411    | 28    | 16    | 56  | 51  | Agpat4        | chr1 | 1910 | 12412331 | 0.602323 | 0.392 | 0.523 |
| NM_011287    | 77    | 70    | 29  | 27  | 4932442K08Rik | chr1 | 4540 | 15569914 | 0.947901 | 0.6   | 0.518 |
| NM_030147    | 19    | 15    | 283 | 227 | Psbm1         | chr1 | 1036 | 15635197 | 0.677707 | 0.502 | 0.555 |
| NM_019641    | 28691 | 18755 | 22  | 22  | Ppp2r1a       | chr1 | 2256 | 21097450 | 0.947901 | 0.544 | 0.5   |
| NM_016909    | 51    | 23    | 56  | 57  | Abca3         | chr1 | 6453 | 24544598 | 0.947901 | 0.484 | 0.496 |
| NM_145420    | 26    | 6     | 70  | 40  | Rnps1         | chr1 | 1631 | 24562481 | 0.753949 | 0.543 | 0.636 |
| NM_001081235 | 38    | 33    | 12  | 16  | Tsc2          | chr1 | 6147 | 24765981 | 0.947901 | 0.536 | 0.429 |
| NM_172561    | 14    | 25    | 8   | 17  | Slc9a3r2      | chr1 | 2085 | 24778788 | 0.947901 | 0.423 | 0.32  |
| NM_145518    | 58    | 49    | 41  | 22  | Syngn3        | chr1 | 1959 | 24822274 | 0.947901 | 0.577 | 0.651 |
| NM_178051    | 28    | 15    | 264 | 326 | Ndufb10       | chr1 | 657  | 24859107 | 0.381503 | 0.339 | 0.447 |
| NM_153082    | 12    | 16    | 18  | 10  | Hagh          | chr1 | 1148 | 25001238 | 0.157861 | 0.281 | 0.643 |
| NM_010325    | 39    | 39    | 21  | 33  | Gnptg         | chr1 | 1234 | 25371429 | 0.947901 | 0.423 | 0.389 |
| NM_025630    | 16    | 10    | 12  | 169 | 0610007P22Rik | chr1 | 1160 | 25379141 | 0.194015 | 0.172 | 0.066 |
| NM_001080747 | 37    | 38    | 24  | 15  | Itfg3         | chr1 | 2629 | 26357314 | 0.947901 | 0.631 | 0.615 |
| NM_145564    | 35    | 25    | 19  | 25  | Luc7l         | chr1 | 4993 | 26419045 | 0.684867 | 0.621 | 0.432 |
| NM_010063    | 131   | 163   | 47  | 48  | Ergic1        | chr1 | 2734 | 26792165 | 0.947901 | 0.529 | 0.495 |
| NM_007688    | 12    | 21    | 38  | 20  | Atp6v0e       | chr1 | 800  | 26836191 | 0.947901 | 0.596 | 0.655 |
| NM_018744    | 16    | 24    | 31  | 33  | Nudt3         | chr1 | 2171 | 27717065 | 0.947901 | 0.515 | 0.484 |
| NM_029432    | 46    | 28    | 213 | 155 | Rpl10a        | chr1 | 700  | 28466442 | 0.841387 | 0.524 | 0.579 |
| NM_001083321 | 21    | 18    | 23  | 30  | Stk38         | chr1 | 3288 | 29114513 | 0.641958 | 0.596 | 0.434 |
| NM_026421    | 16    | 17    | 25  | 12  | Sfrs3         | chr1 | 2566 | 29178752 | 0.947901 | 0.607 | 0.676 |
| NM_133850    | 64    | 59    | 29  | 27  | Cpne5         | chr1 | 4420 | 29299288 | 0.947901 | 0.519 | 0.518 |
| NM_172516    | 13    | 26    | 66  | 17  | Ppil1         | chr1 | 1215 | 29400834 | 0.280466 | 0.614 | 0.795 |
| NM_198305    | 17    | 16    | 50  | 50  | BC004004      | chr1 | 2627 | 29439189 | 0.733758 | 0.353 | 0.5   |
| NM_138672    | 23    | 17    | 44  | 46  | Mtch1         | chr1 | 1918 | 29475743 | 0.677707 | 0.596 | 0.489 |
| NM_010148    | 38    | 29    | 161 | 82  | Glo1          | chr1 | 1958 | 30749422 | 0.395208 | 0.754 | 0.663 |
| NM_021386    | 33    | 33    | 17  | 39  | Akap8         | chr1 | 3695 | 32446409 | 0.488544 | 0.484 | 0.304 |
| NM_019586    | 36    | 25    | 15  | 29  | Rab11b        | chr1 | 6065 | 33882839 | 0.947901 | 0.417 | 0.341 |
| NM_030559    | 45    | 45    | 23  | 8   | Stk19         | chr1 | 1078 | 34960962 | 0.947901 | 0.8   | 0.742 |
| NM_173437    | 65    | 34    | 16  | 10  | Rpp21         | chr1 | 500  | 36392958 | 0.947901 | 0.688 | 0.615 |
| NM_022314    | 27    | 31    | 84  | 48  | Ppp1r11       | chr1 | 1694 | 37088479 | 0.619795 | 0.488 | 0.636 |
| NM_028810    | 19    | 28    | 57  | 14  | Zfp57         | chr1 | 1689 | 37146755 | 0.947901 | 0.75  | 0.803 |
| NM_001081039 | 33    | 24    | 139 | 101 | Gabbr1        | chr1 | 4486 | 37209139 | 0.445503 | 0.482 | 0.579 |
| NM_010422    | 21    | 15    | 100 | 121 | Pla2g7        | chr1 | 1923 | 43739797 | 0.841387 | 0.516 | 0.452 |

|              |     |    |     |                  |      |       |          |          |       |       |
|--------------|-----|----|-----|------------------|------|-------|----------|----------|-------|-------|
| NM_013767    | 54  | 55 | 51  | 24 Slc25a27      | chr1 | 2687  | 43790357 | 0.947901 | 0.685 | 0.68  |
| NM_026453    | 18  | 11 | 50  | 22 Cdc5l         | chr1 | 2994  | 45553908 | 0.2416   | 0.458 | 0.694 |
| NM_008618    | 132 | 85 | 119 | 88 Mea1          | chr1 | 841   | 46819833 | 0.947901 | 0.593 | 0.575 |
| NM_172757    | 111 | 25 | 13  | 14 Rpl7l1        | chr1 | 2606  | 46918804 | 0.866345 | 0.621 | 0.481 |
| NM_173759    | 53  | 44 | 21  | 24 Al314976      | chr1 | 1135  | 48556166 | 0.947901 | 0.544 | 0.467 |
| NM_025877    | 39  | 25 | 21  | 17 Plcl2         | chr1 | 4138  | 50827039 | 0.947901 | 0.632 | 0.553 |
| NM_026165    | 27  | 24 | 19  | 11 Satb1         | chr1 | 2922  | 51944649 | 0.947901 | 0.667 | 0.633 |
| NM_026064    | 168 | 99 | 16  | 33 Rab5a         | chr1 | 2364  | 53645685 | 0.886392 | 0.44  | 0.327 |
| NM_172265    | 19  | 16 | 29  | 40 Fsd1          | chr1 | 1748  | 56135357 | 0.805861 | 0.533 | 0.42  |
| NM_009717    | 28  | 20 | 21  | 10 Mpnd          | chr1 | 1701  | 56156061 | 0.947901 | 0.63  | 0.677 |
| NM_008214    | 30  | 37 | 20  | 28 Ubxdl         | chr1 | 1714  | 56207738 | 0.684867 | 0.543 | 0.417 |
| NM_178252    | 18  | 18 | 33  | 27 D17Wsu104e    | chr1 | 913   | 56323328 | 0.459791 | 0.348 | 0.55  |
| NM_026369    | 37  | 55 | 29  | 13 Dpp9          | chr1 | 3456  | 56351247 | 0.844976 | 0.577 | 0.69  |
| NM_008775    | 42  | 45 | 29  | 21 Lonp1         | chr1 | 2970  | 56766219 | 0.805861 | 0.462 | 0.58  |
| NM_177814    | 20  | 14 | 26  | 14 Clpp          | chr1 | 990   | 57132930 | 0.460468 | 0.456 | 0.65  |
| NM_016775    | 25  | 30 | 37  | 35 Slc25a23      | chr1 | 3384  | 57183264 | 0.844976 | 0.609 | 0.514 |
| NM_145544    | 98  | 46 | 343 | 62 Tubb4         | chr1 | 2246  | 57219949 | 0.935791 | 0.828 | 0.847 |
| NM_144530    | 42  | 45 | 60  | 23 Rab31         | chr1 | 3416  | 66001460 | 0.301567 | 0.526 | 0.723 |
| NM_025978    | 54  | 7  | 29  | 27 Ppp4r1        | chr1 | 3864  | 66190204 | 0.947901 | 0.56  | 0.518 |
| NM_198862    | 43  | 51 | 127 | 140 Ndufv2       | chr1 | 1472  | 66438641 | 0.947901 | 0.51  | 0.476 |
| NM_145491    | 12  | 24 | 18  | 7 1110012J17Rik  | chr1 | 7238  | 66797788 | 0.753949 | 0.86  | 0.72  |
| NM_001025067 | 10  | 28 | 90  | 91 Epb4.1l3      | chr1 | 4051  | 69633905 | 0.744899 | 0.588 | 0.497 |
| NM_011696    | 60  | 57 | 323 | 221 Mylc2b       | chr1 | 939   | 71326582 | 0.677707 | 0.546 | 0.594 |
| NM_133656    | 17  | 8  | 70  | 53 2900073G15Rik | chr1 | 1779  | 71344077 | 0.841387 | 0.629 | 0.569 |
| NM_026119    | 35  | 24 | 42  | 63 Ypel5         | chr1 | 2869  | 73200176 | 0.74999  | 0.5   | 0.4   |
| NM_013737    | 65  | 61 | 22  | 29 2410091C18Rik | chr1 | 2303  | 79346762 | 0.928685 | 0.533 | 0.431 |
| NM_028712    | 18  | 24 | 75  | 37 Tmem178       | chr1 | 1696  | 81400222 | 0.450421 | 0.514 | 0.67  |
| NM_001025246 | 19  | 22 | 47  | 59 Slc8a1        | chr1 | 18599 | 82137692 | 0.289667 | 0.648 | 0.443 |
| NM_029249    | 24  | 28 | 24  | 15 Eml4          | chr1 | 5125  | 83877255 | 0.92262  | 0.533 | 0.615 |
| NM_175258    | 19  | 11 | 16  | 18 Rhoq          | chr1 | 4159  | 87396579 | 0.833193 | 0.333 | 0.471 |
| NM_172624    | 30  | 22 | 51  | 39 Cript         | chr1 | 1137  | 87434387 | 0.947901 | 0.579 | 0.567 |
| NM_013853    | 28  | 26 | 18  | 36 Msh2          | chr1 | 3056  | 88122775 | 0.525209 | 0.519 | 0.333 |
| NM_009859    | 33  | 26 | 14  | 13 Arhgap12      | chr1 | 4959  | 6112289  | 0.947901 | 0.485 | 0.519 |
| NM_170760    | 31  | 34 | 123 | 120 Rab18        | chr1 | 2257  | 6789192  | 0.945732 | 0.451 | 0.506 |
| NM_011399    | 22  | 28 | 105 | 138 Riok3        | chr1 | 3661  | 12307327 | 0.9341   | 0.383 | 0.432 |
| NM_001080755 | 43  | 8  | 949 | 975 Ttr          | chr1 | 1051  | 20832212 | 0.947901 | 0.499 | 0.493 |
| NM_010267    | 44  | 47 | 40  | 40 Dtna          | chr1 | 6321  | 23574080 | 0.210831 | 0.707 | 0.5   |
| NM_172730    | 23  | 9  | 133 | 91 Mapre2        | chr1 | 4022  | 23962492 | 0.947901 | 0.602 | 0.594 |
| NM_028761    | 14  | 18 | 35  | 46 Zfp191        | chr1 | 3143  | 24173116 | 0.933057 | 0.344 | 0.432 |
| NM_172961    | 31  | 45 | 16  | 10 D030070L09Rik | chr1 | 2360  | 24272650 | 0.947901 | 0.571 | 0.615 |
| NM_007460    | 22  | 25 | 23  | 23 Fhod3         | chr1 | 5439  | 25291506 | 0.947901 | 0.423 | 0.5   |
| NM_013922    | 63  | 42 | 16  | 15 5730494M16Rik | chr1 | 1234  | 25316754 | 0.947901 | 0.578 | 0.516 |
| NM_009774    | 14  | 15 | 103 | 18 Syt4          | chr1 | 3901  | 31597586 | 0.174288 | 0.615 | 0.851 |
| NM_026061    | 23  | 28 | 71  | 90 Slc25a46      | chr1 | 4371  | 31741114 | 0.845646 | 0.529 | 0.441 |
| NM_025562    | 65  | 96 | 147 | 106 D0H4S114     | chr1 | 2223  | 33597639 | 0.774165 | 0.517 | 0.581 |
| NM_023167    | 46  | 18 | 19  | 8 Brd8           | chr1 | 4677  | 34784211 | 0.833193 | 0.559 | 0.704 |
| NM_172664    | 22  | 18 | 26  | 22 Cdc23         | chr1 | 4134  | 34797074 | 0.945732 | 0.455 | 0.542 |
| NM_030210    | 43  | 25 | 34  | 25 Ctnna1        | chr1 | 3713  | 35413504 | 0.947901 | 0.632 | 0.576 |
| NM_021789    | 88  | 66 | 215 | 244 Paip2        | chr1 | 1424  | 35776084 | 0.488654 | 0.532 | 0.468 |
| NM_010733    | 52  | 37 | 107 | 73 Sra1          | chr1 | 893   | 36827082 | 0.342344 | 0.455 | 0.594 |
| NM_010251    | 26  | 19 | 132 | 125 Ndufa2       | chr1 | 529   | 36902187 | 0.947901 | 0.486 | 0.514 |
| NM_008948    | 63  | 71 | 28  | 32 lk            | chr1 | 1996  | 36917111 | 0.833193 | 0.581 | 0.467 |



|              |     |     |     |                   |      |      |          |          |       |       |
|--------------|-----|-----|-----|-------------------|------|------|----------|----------|-------|-------|
| NM_177239    | 17  | 11  | 96  | 85 Hars           | chr1 | 1902 | 36931030 | 0.833193 | 0.448 | 0.53  |
| NM_010681    | 14  | 12  | 19  | 28 Pcdhb9         | chr1 | 3055 | 37560665 | 0.947901 | 0.321 | 0.404 |
| NM_013587    | 98  | 79  | 15  | 13 Pcdhga2        | chr1 | 4537 | 37828970 | 0.947901 | 0.538 | 0.536 |
| NM_178915    | 18  | 24  | 15  | 13 Pcdhgb2        | chr1 | 4739 | 37849936 | 0.947901 | 0.514 | 0.536 |
| NM_027959    | 24  | 19  | 15  | 13 Pcdhga7        | chr1 | 4660 | 37874519 | 0.947901 | 0.514 | 0.536 |
| NM_007926    | 50  | 55  | 15  | 13 Pcdhga8        | chr1 | 4730 | 37885373 | 0.947901 | 0.514 | 0.536 |
| NM_146153    | 66  | 53  | 15  | 13 Pcdhgb5        | chr1 | 4522 | 37890936 | 0.947901 | 0.481 | 0.536 |
| NM_016737    | 20  | 17  | 15  | 13 Pcdhga9        | chr1 | 4717 | 37896650 | 0.947901 | 0.514 | 0.536 |
| NM_001081298 | 34  | 17  | 15  | 15 Pcdhga12       | chr1 | 5080 | 37925322 | 0.947901 | 0.5   | 0.5   |
| NM_023429    | 29  | 40  | 15  | 13 Pcdhgc3        | chr1 | 4687 | 38000805 | 0.947901 | 0.538 | 0.536 |
| NM_025319    | 237 | 223 | 15  | 13 Pcdhgc4        | chr1 | 5047 | 38000805 | 0.947901 | 0.538 | 0.536 |
| NM_007467    | 107 | 85  | 15  | 13 Pcdhgc5        | chr1 | 4708 | 38000805 | 0.947901 | 0.514 | 0.536 |
| NM_178662    | 23  | 21  | 15  | 15 Hdac3          | chr1 | 2005 | 38112238 | 0.825608 | 0.636 | 0.5   |
| NM_018799    | 25  | 25  | 136 | 104 Rnf14         | chr1 | 2940 | 38476426 | 0.947901 | 0.563 | 0.567 |
| NM_025933    | 104 | 94  | 28  | 23 Nr3c1          | chr1 | 6345 | 39582203 | 0.947901 | 0.596 | 0.549 |
| NM_001048167 | 36  | 38  | 71  | 55 Ppp2r2b        | chr1 | 2029 | 42861158 | 0.709822 | 0.444 | 0.563 |
| NM_025670    | 49  | 41  | 42  | 41 Sema6a         | chr1 | 6901 | 47451612 | 0.844976 | 0.4   | 0.506 |
| NM_021426    | 33  | 20  | 12  | 29 Gramd3         | chr1 | 2611 | 56591901 | 0.947901 | 0.375 | 0.293 |
| NM_011074    | 15  | 10  | 118 | 128 A730017C20Rik | chr1 | 1810 | 59236051 | 0.844976 | 0.546 | 0.48  |
| NM_023721    | 41  | 42  | 84  | 58 Dctn4          | chr1 | 3714 | 60685905 | 0.296511 | 0.381 | 0.592 |
| NM_001081422 | 16  | 11  | 62  | 56 Csnk1a1        | chr1 | 2013 | 61747121 | 0.947901 | 0.545 | 0.525 |
| NM_019707    | 17  | 15  | 23  | 27 Napg           | chr1 | 3496 | 63156473 | 0.947901 | 0.462 | 0.46  |
| NM_174997    | 71  | 46  | 60  | 26 Txnl1          | chr1 | 2558 | 63851852 | 0.629123 | 0.531 | 0.698 |
| NM_001039000 | 205 | 143 | 25  | 17 Fech           | chr1 | 2901 | 64621186 | 0.162269 | 0.343 | 0.595 |
| NM_001038492 | 19  | 10  | 150 | 117 Nars          | chr1 | 2616 | 64670117 | 0.947901 | 0.542 | 0.562 |
| NM_146094    | 32  | 29  | 40  | 18 Lman1          | chr1 | 3575 | 66156384 | 0.158693 | 0.47  | 0.69  |
| NM_029478    | 16  | 11  | 189 | 218 Gnal          | chr1 | 5223 | 67384427 | 0.381503 | 0.559 | 0.464 |
| NM_025433    | 18  | 11  | 171 | 18 Slmo1          | chr1 | 2167 | 67640097 | 0.947901 | 0.923 | 0.905 |
| NM_011216    | 153 | 202 | 65  | 53 Spire1         | chr1 | 4761 | 67690067 | 0.783653 | 0.435 | 0.551 |
| NM_172994    | 45  | 32  | 28  | 22 Rnmt           | chr1 | 3928 | 68482476 | 0.947901 | 0.5   | 0.56  |
| NM_138598    | 19  | 21  | 74  | 58 Tcf4           | chr1 | 7462 | 69847424 | 0.677707 | 0.446 | 0.561 |
| NM_172592    | 19  | 32  | 33  | 35 Smad4          | chr1 | 3361 | 73837684 | 0.947901 | 0.469 | 0.485 |
| NM_026592    | 56  | 51  | 8   | 17 Gm672          | chr1 | 6192 | 75796972 | 0.947901 | 0.25  | 0.32  |
| NM_001042617 | 32  | 31  | 34  | 21 Ier3ip1        | chr1 | 1369 | 77179390 | 0.716713 | 0.462 | 0.618 |
| NM_030057    | 75  | 66  | 26  | 38 Atp5a1         | chr1 | 2443 | 78021449 | 0.509331 | 0.551 | 0.406 |
| NM_010740    | 17  | 20  | 37  | 9 Mbp             | chr1 | 4820 | 82726462 | 0.947901 | 0.786 | 0.804 |
| NM_025447    | 15  | 14  | 18  | 9 Tshz1           | chr1 | 5814 | 84181095 | 0.947901 | 0.614 | 0.667 |
| NM_025982    | 32  | 10  | 141 | 79 Cyb5           | chr1 | 749  | 85047239 | 0.528489 | 0.532 | 0.641 |
| NM_025336    | 13  | 17  | 96  | 80 Cbln2          | chr1 | 2201 | 86886101 | 0.780711 | 0.639 | 0.545 |
| NM_013507    | 104 | 104 | 52  | 40 Mrpl21         | chr1 | 992  | 3292469  | 0.947901 | 0.539 | 0.565 |
| NM_080287    | 30  | 40  | 317 | 262 Ndufs8        | chr1 | 963  | 3912618  | 0.947901 | 0.534 | 0.547 |
| NM_173439    | 26  | 17  | 56  | 60 Ndufv1         | chr1 | 1572 | 4011179  | 0.947901 | 0.5   | 0.483 |
| NM_054054    | 18  | 34  | 118 | 151 Gstp2         | chr1 | 785  | 4041671  | 0.947901 | 0.48  | 0.439 |
| NM_011638    | 26  | 14  | 20  | 18 BC021614       | chr1 | 683  | 4057628  | 0.947901 | 0.514 | 0.526 |
| NM_028152    | 20  | 21  | 47  | 42 Ccs            | chr1 | 1057 | 4839239  | 0.465109 | 0.414 | 0.528 |
| NM_152915    | 107 | 87  | 17  | 20 Mrpl11         | chr1 | 821  | 4962327  | 0.947901 | 0.485 | 0.459 |
| NM_024206    | 45  | 35  | 28  | 17 Slc29a2        | chr1 | 2033 | 5031014  | 0.947901 | 0.615 | 0.622 |
| NM_139146    | 27  | 23  | 89  | 39 B3gnt1         | chr1 | 2035 | 5040820  | 0.947901 | 0.655 | 0.695 |
| NM_019879    | 39  | 32  | 88  | 69 Cfl1           | chr1 | 1196 | 5493733  | 0.947901 | 0.598 | 0.561 |
| NM_026482    | 49  | 34  | 18  | 12 Mrpl49         | chr1 | 1722 | 6054612  | 0.684867 | 0.405 | 0.6   |
| NM_028981    | 20  | 28  | 117 | 107 Prdx5         | chr1 | 688  | 6981419  | 0.184023 | 0.694 | 0.522 |
| NM_053086    | 38  | 21  | 30  | 16 Stip1          | chr1 | 2080 | 7110010  | 0.86501  | 0.541 | 0.652 |

|              |      |      |     |                  |      |      |          |          |       |       |
|--------------|------|------|-----|------------------|------|------|----------|----------|-------|-------|
| NM_025277    | 40   | 23   | 16  | 16 Rtn3          | chr1 | 5030 | 7557724  | 0.915297 | 0.611 | 0.5   |
| NM_020580    | 24   | 29   | 19  | 9 Polr2g         | chr1 | 868  | 8867667  | 0.651863 | 0.521 | 0.679 |
| NM_008717    | 21   | 38   | 405 | 273 Gng3         | chr1 | 1699 | 8912106  | 0.947901 | 0.612 | 0.597 |
| NM_011116    | 99   | 68   | 14  | 13 Bscl2         | chr1 | 1654 | 8921932  | 0.947901 | 0.595 | 0.519 |
| NM_026697    | 45   | 36   | 32  | 26 D19Erd721e    | chr1 | 1048 | 8948739  | 0.920751 | 0.647 | 0.552 |
| NM_025364    | 46   | 39   | 14  | 13 1810009A15Rik | chr1 | 615  | 8964994  | 0.947901 | 0.554 | 0.519 |
| NM_173399    | 23   | 52   | 12  | 13 B3gat3        | chr1 | 1599 | 9000814  | 0.502018 | 0.717 | 0.48  |
| NM_172436    | 18   | 26   | 134 | 104 Eef1g        | chr1 | 1565 | 9051829  | 0.882258 | 0.53  | 0.563 |
| NM_025887    | 11   | 14   | 82  | 53 Fads1         | chr1 | 3408 | 10267469 | 0.850825 | 0.525 | 0.607 |
| NM_153543    | 22   | 20   | 17  | 19 5730453116Rik | chr1 | 3500 | 10620471 | 0.947901 | 0.43  | 0.472 |
| NM_001013378 | 18   | 9    | 26  | 10 Mrpl16        | chr1 | 1134 | 11848646 | 0.783653 | 0.575 | 0.722 |
| NM_010518    | 182  | 119  | 25  | 10 AV312086      | chr1 | 4054 | 12017965 | 0.947901 | 0.775 | 0.714 |
| NM_053073    | 20   | 19   | 15  | 12 Osbp          | chr1 | 4590 | 12066271 | 0.947901 | 0.452 | 0.556 |
| NM_025344    | 16   | 13   | 24  | 9 Dtx4           | chr1 | 5243 | 12566385 | 0.947901 | 0.676 | 0.727 |
| NM_008138    | 85   | 141  | 127 | 88 Gnaq          | chr1 | 5634 | 16460649 | 0.947901 | 0.574 | 0.591 |
| NM_172255    | 55   | 52   | 60  | 78 Gda           | chr1 | 5417 | 21508722 | 0.753949 | 0.551 | 0.435 |
| NM_023464    | 49   | 41   | 87  | 78 Smarca2       | chr1 | 5831 | 26848785 | 0.947901 | 0.5   | 0.527 |
| NM_008802    | 39   | 39   | 23  | 19 D19Bwg1357e   | chr1 | 3462 | 27495859 | 0.604275 | 0.727 | 0.548 |
| NM_001013380 | 15   | 11   | 43  | 38 Slc1a1        | chr1 | 3708 | 28987870 | 0.764991 | 0.649 | 0.531 |
| NM_025514    | 26   | 16   | 17  | 14 Jak2          | chr1 | 4947 | 29386426 | 0.947901 | 0.565 | 0.548 |
| NM_028873    | 14   | 22   | 32  | 21 Minpp1        | chr1 | 2619 | 32589122 | 0.947901 | 0.674 | 0.604 |
| NM_001081011 | 45   | 42   | 119 | 91 Atad1         | chr1 | 2813 | 32776098 | 0.947901 | 0.591 | 0.567 |
| NM_009458    | 18   | 25   | 21  | 15 Stambpl1      | chr1 | 1978 | 34314569 | 0.947901 | 0.579 | 0.583 |
| NM_001081114 | 66   | 59   | 18  | 19 Ide           | chr1 | 5104 | 37405084 | 0.947901 | 0.523 | 0.486 |
| NM_027016    | 26   | 15   | 104 | 61 Sorbs1        | chr1 | 5275 | 40467945 | 0.947901 | 0.618 | 0.63  |
| NM_011965    | 45   | 66   | 63  | 57 Tm9sf3        | chr1 | 6144 | 41313179 | 0.947901 | 0.533 | 0.525 |
| NM_001026212 | 15   | 10   | 24  | 38 Mms19l        | chr1 | 3965 | 42038828 | 0.876174 | 0.488 | 0.387 |
| NM_025278    | 15   | 16   | 45  | 42 BC023055      | chr1 | 1817 | 42153067 | 0.929707 | 0.446 | 0.517 |
| NM_023831    | 91   | 63   | 19  | 21 Got1          | chr1 | 2065 | 43590264 | 0.805861 | 0.609 | 0.475 |
| NM_033564    | 24   | 3    | 415 | 346 Scd2         | chr1 | 5032 | 44381069 | 0.766362 | 0.505 | 0.545 |
| NM_144921    | 50   | 33   | 89  | 77 Ndufb8        | chr1 | 641  | 44629516 | 0.863684 | 0.451 | 0.536 |
| NM_172614    | 48   | 47   | 42  | 16 Sfxn3         | chr1 | 2870 | 45130848 | 0.497334 | 0.54  | 0.724 |
| NM_001030014 | 17   | 8    | 9   | 19 Btrc          | chr1 | 6358 | 45606825 | 0.409809 | 0.595 | 0.321 |
| NM_025974    | 229  | 174  | 33  | 26 Mgea5         | chr1 | 4797 | 45857604 | 0.915297 | 0.482 | 0.559 |
| NM_009840    | 69   | 64   | 52  | 40 Nolc1         | chr1 | 3649 | 46156792 | 0.888353 | 0.644 | 0.565 |
| NM_026468    | 64   | 64   | 180 | 155 Actr1a       | chr1 | 2742 | 46456870 | 0.947901 | 0.513 | 0.537 |
| NM_018743    | 43   | 59   | 412 | 478 Arl3         | chr1 | 838  | 46626117 | 0.947901 | 0.466 | 0.463 |
| NM_138669    | 33   | 47   | 25  | 15 D19Wsu162e    | chr1 | 3921 | 46730963 | 0.947901 | 0.689 | 0.625 |
| NM_026277    | 23   | 18   | 40  | 37 Nt5c2         | chr1 | 2728 | 46979569 | 0.637683 | 0.667 | 0.519 |
| NM_009930    | 23   | 7    | 34  | 15 Ina           | chr1 | 2272 | 47097958 | 0.947901 | 0.654 | 0.694 |
| NM_023799    | 41   | 44   | 36  | 38 Pcgf6         | chr1 | 2126 | 47123499 | 0.947901 | 0.538 | 0.486 |
| NM_026007    | 1255 | 1113 | 286 | 458 Usmg5        | chr1 | 370  | 47160532 | 0.677707 | 0.432 | 0.384 |
| NM_173181    | 34   | 33   | 43  | 55 Gsto1         | chr1 | 1163 | 47938826 | 0.947901 | 0.451 | 0.439 |
| NM_080469    | 26   | 18   | 36  | 19 Mxi1          | chr1 | 4843 | 53448352 | 0.385624 | 0.806 | 0.655 |
| NM_001003934 | 22   | 14   | 20  | 17 Shoc2         | chr1 | 3964 | 54103964 | 0.947901 | 0.5   | 0.541 |
| NM_183251    | 20   | 17   | 85  | 64 Tcf7l2        | chr1 | 3230 | 56006168 | 0.947901 | 0.585 | 0.57  |
| NM_009158    | 54   | 63   | 49  | 39 Hspa12a       | chr1 | 5733 | 58902090 | 0.931904 | 0.481 | 0.557 |
| NM_029334    | 32   | 40   | 105 | 75 4930506M07Rik | chr1 | 3767 | 59116445 | 0.608853 | 0.485 | 0.583 |
| NM_025882    | 32   | 24   | 23  | 35 1810055E12Rik | chr1 | 2307 | 60911725 | 0.947901 | 0.464 | 0.397 |
| NM_008704    | 70   | 62   | 21  | 29 Prdx3         | chr1 | 1445 | 60941120 | 0.947901 | 0.483 | 0.42  |
| NM_001081119 | 13   | 13   | 19  | 11 Sephs1        | chr2 | 5329 | 4830794  | 0.947901 | 0.688 | 0.633 |
| NM_181070    | 32   | 39   | 55  | 45 Phyh          | chr2 | 1474 | 4859622  | 0.945732 | 0.486 | 0.55  |

|              |     |     |     |     |               |      |      |          |          |       |       |
|--------------|-----|-----|-----|-----|---------------|------|------|----------|----------|-------|-------|
| NM_009846    | 201 | 138 | 70  | 71  | Cdc123        | chr2 | 1623 | 5765904  | 0.146417 | 0.333 | 0.496 |
| NM_015751    | 152 | 142 | 40  | 34  | Sec61a2       | chr2 | 2369 | 5807597  | 0.947901 | 0.568 | 0.541 |
| NM_026455    | 37  | 45  | 29  | 27  | Kin           | chr2 | 1379 | 10013550 | 0.947901 | 0.516 | 0.518 |
| NM_175692    | 377 | 399 | 16  | 12  | Rbm17         | chr2 | 1583 | 11518348 | 0.947901 | 0.55  | 0.571 |
| NM_008745    | 25  | 18  | 10  | 17  | Pip5k2a       | chr2 | 3471 | 18810697 | 0.935791 | 0.484 | 0.37  |
| NM_026437    | 13  | 15  | 149 | 108 | Gad2          | chr2 | 5625 | 22546204 | 0.947901 | 0.551 | 0.58  |
| NM_025578    | 41  | 40  | 74  | 48  | Ssna1         | chr2 | 864  | 25126700 | 0.915297 | 0.544 | 0.607 |
| NM_008155    | 146 | 112 | 132 | 83  | Npdc1         | chr2 | 1473 | 25264449 | 0.296511 | 0.508 | 0.614 |
| NM_028754    | 50  | 46  | 27  | 19  | BC029214      | chr2 | 997  | 25315043 | 0.947901 | 0.621 | 0.587 |
| NM_199466    | 56  | 49  | 200 | 201 | Ptgds         | chr2 | 806  | 25323360 | 0.289667 | 0.586 | 0.499 |
| NM_138668    | 21  | 12  | 66  | 74  | Fbxw5         | chr2 | 2359 | 25359235 | 0.947901 | 0.529 | 0.471 |
| NM_009932    | 26  | 30  | 165 | 183 | Phpt1         | chr2 | 583  | 25429214 | 0.601949 | 0.56  | 0.474 |
| NM_023215    | 20  | 21  | 24  | 19  | Kcnt1         | chr2 | 5893 | 25764790 | 0.947901 | 0.563 | 0.558 |
| NM_011286    | 47  | 28  | 40  | 39  | Gpsm1         | chr2 | 3357 | 26200783 | 0.80737  | 0.617 | 0.506 |
| NM_025554    | 28  | 35  | 14  | 16  | D2Bwg1335e    | chr2 | 2913 | 26203955 | 0.463681 | 0.707 | 0.467 |
| NM_130878    | 20  | 11  | 26  | 11  | Surf2         | chr2 | 1170 | 26774719 | 0.706186 | 0.535 | 0.703 |
| NM_153117    | 62  | 52  | 58  | 40  | Olfm1         | chr2 | 2686 | 28084609 | 0.646804 | 0.476 | 0.592 |
| NM_026511    | 52  | 16  | 13  | 12  | Med27         | chr2 | 1232 | 29379889 | 0.947901 | 0.514 | 0.52  |
| NM_146243    | 25  | 8   | 27  | 28  | Spna2         | chr2 | 8021 | 29886282 | 0.947901 | 0.522 | 0.491 |
| NM_178655    | 174 | 127 | 62  | 57  | Ppp2r4        | chr2 | 2574 | 30302146 | 0.587635 | 0.634 | 0.521 |
| NM_198108    | 29  | 36  | 29  | 13  | Tor1b         | chr2 | 2997 | 30813838 | 0.602323 | 0.51  | 0.69  |
| NM_021446    | 16  | 17  | 22  | 19  | BC005624      | chr2 | 1293 | 30828685 | 0.947901 | 0.607 | 0.537 |
| NM_009433    | 19  | 16  | 144 | 115 | 5830434P21Rik | chr2 | 8556 | 32086277 | 0.947901 | 0.546 | 0.556 |
| NM_007404    | 25  | 22  | 102 | 104 | Stxbp1        | chr2 | 3874 | 32679065 | 0.947901 | 0.517 | 0.495 |
| NM_026390    | 16  | 13  | 234 | 21  | Rpl12         | chr2 | 643  | 32818144 | 0.805861 | 0.86  | 0.918 |
| NM_001039094 | 23  | 36  | 24  | 28  | Garnl3        | chr2 | 3387 | 32846109 | 0.933307 | 0.547 | 0.462 |
| NM_011173    | 29  | 5   | 96  | 111 | Hspa5         | chr2 | 2539 | 34629364 | 0.381503 | 0.604 | 0.464 |
| NM_025827    | 12  | 29  | 98  | 60  | Rab14         | chr2 | 3100 | 35036126 | 0.89468  | 0.556 | 0.62  |
| NM_178399    | 129 | 97  | 75  | 73  | Ndufa8        | chr2 | 739  | 35904769 | 0.947901 | 0.534 | 0.507 |
| NM_001040106 | 103 | 95  | 25  | 24  | Rbm18         | chr2 | 2452 | 35982702 | 0.947901 | 0.452 | 0.51  |
| NM_028611    | 16  | 14  | 21  | 35  | Rabgap1       | chr2 | 4967 | 37421294 | 0.573356 | 0.571 | 0.375 |
| NM_009615    | 13  | 13  | 80  | 59  | Strbp         | chr2 | 2847 | 37439201 | 0.947901 | 0.564 | 0.576 |
| NM_029425    | 21  | 15  | 39  | 16  | Orc4l         | chr2 | 4029 | 48804699 | 0.947901 | 0.676 | 0.709 |
| NM_001001881 | 17  | 32  | 18  | 29  | Kif5c         | chr2 | 6867 | 49626748 | 0.947901 | 0.436 | 0.383 |
| NM_015747    | 21  | 14  | 34  | 22  | 2010311D03Rik | chr2 | 1302 | 50143318 | 0.947901 | 0.629 | 0.607 |
| NM_001081557 | 45  | 33  | 14  | 12  | Rnd3          | chr2 | 2827 | 51004623 | 0.848802 | 0.404 | 0.538 |
| NM_172661    | 220 | 183 | 77  | 59  | Psmid14       | chr2 | 1560 | 61638140 | 0.947901 | 0.525 | 0.566 |
| NM_172302    | 55  | 73  | 57  | 77  | Ppig          | chr2 | 6297 | 69587917 | 0.947901 | 0.385 | 0.425 |
| NM_001033347 | 24  | 29  | 19  | 28  | Phospho2      | chr2 | 2104 | 69634712 | 0.780086 | 0.55  | 0.404 |
| NM_177700    | 15  | 14  | 70  | 44  | Klhl23        | chr2 | 4511 | 69673877 | 0.783653 | 0.514 | 0.614 |
| NM_007508    | 61  | 51  | 282 | 207 | Gad1          | chr2 | 3231 | 70439150 | 0.44857  | 0.47  | 0.577 |
| NM_133839    | 39  | 23  | 62  | 107 | Gorasp2       | chr2 | 2239 | 70528778 | 0.947901 | 0.38  | 0.367 |
| NM_172701    | 62  | 34  | 38  | 47  | Tlk1          | chr2 | 4080 | 70624997 | 0.863684 | 0.55  | 0.447 |
| NM_178613    | 13  | 19  | 293 | 145 | Dync1i2       | chr2 | 2443 | 71100873 | 0.25908  | 0.558 | 0.669 |
| NM_010580    | 16  | 30  | 39  | 39  | Slc25a12      | chr2 | 2924 | 71162153 | 0.890243 | 0.409 | 0.5   |
| NM_029601    | 44  | 50  | 14  | 13  | Chn1          | chr2 | 1025 | 73462938 | 0.947901 | 0.536 | 0.519 |
| NM_033609    | 16  | 11  | 35  | 29  | Ttc30b        | chr2 | 2634 | 75774280 | 0.943372 | 0.459 | 0.547 |
| NM_024203    | 18  | 12  | 35  | 32  | Osbpl6        | chr2 | 8055 | 76434049 | 0.947901 | 0.529 | 0.522 |
| NM_001004361 | 26  | 19  | 25  | 27  | Prkra         | chr2 | 1554 | 76481318 | 0.947901 | 0.407 | 0.481 |
| NM_025762    | 20  | 5   | 33  | 29  | Pde1a         | chr2 | 4271 | 79969058 | 0.947901 | 0.615 | 0.532 |
| NM_133998    | 33  | 28  | 57  | 56  | Dnajc10       | chr2 | 4054 | 80193598 | 0.947901 | 0.489 | 0.504 |
| NM_153406    | 15  | 24  | 37  | 41  | Ctnnd1        | chr2 | 5475 | 84490725 | 0.677707 | 0.645 | 0.474 |



|              |     |     |     |                   |      |       |           |          |       |       |
|--------------|-----|-----|-----|-------------------|------|-------|-----------|----------|-------|-------|
| NM_025389    | 14  | 20  | 53  | 28 Txndc14        | chr2 | 1968  | 84515960  | 0.602323 | 0.522 | 0.654 |
| NM_023210    | 21  | 17  | 96  | 88 Timm10         | chr2 | 682   | 84670080  | 0.265994 | 0.369 | 0.522 |
| NM_030225    | 107 | 55  | 67  | 58 Psmc3          | chr2 | 1569  | 90899565  | 0.859534 | 0.47  | 0.536 |
| NM_025997    | 24  | 20  | 37  | 32 Madd           | chr2 | 6009  | 91019416  | 0.947901 | 0.533 | 0.536 |
| NM_172271    | 40  | 30  | 19  | 14 Arhgap1        | chr2 | 3086  | 91509819  | 0.947901 | 0.536 | 0.576 |
| NM_009084    | 38  | 29  | 44  | 32 Trp53i11       | chr2 | 2687  | 93040748  | 0.813566 | 0.463 | 0.579 |
| NM_175149    | 18  | 29  | 80  | 87 Hsd17b12       | chr2 | 1839  | 93955217  | 0.947901 | 0.458 | 0.479 |
| NM_172590    | 17  | 15  | 39  | 17 Api5           | chr2 | 3702  | 94267219  | 0.947901 | 0.731 | 0.696 |
| NM_133722    | 41  | 30  | 103 | 73 B230118H07Rik  | chr2 | 2269  | 101469090 | 0.86501  | 0.523 | 0.585 |
| NM_024182    | 41  | 66  | 20  | 23 Commd9         | chr2 | 1175  | 101739028 | 0.712972 | 0.585 | 0.465 |
| NM_001025372 | 43  | 37  | 171 | 127 Trim44        | chr2 | 5612  | 102140320 | 0.947901 | 0.549 | 0.574 |
| NM_029436    | 14  | 15  | 18  | 22 Apip           | chr2 | 896   | 102931990 | 0.677707 | 0.59  | 0.45  |
| NM_026503    | 18  | 9   | 56  | 52 Cat            | chr2 | 2551  | 103325178 | 0.947901 | 0.477 | 0.519 |
| NM_177326    | 17  | 12  | 35  | 57 D430041D05Rik  | chr2 | 10124 | 104095228 | 0.936394 | 0.453 | 0.38  |
| NM_178110    | 58  | 44  | 85  | 102 Pcid1         | chr2 | 1230  | 104855000 | 0.490713 | 0.575 | 0.455 |
| NM_133360    | 25  | 25  | 21  | 14 Slc12a6        | chr2 | 5970  | 112200822 | 0.947901 | 0.677 | 0.6   |
| NM_011462    | 55  | 29  | 114 | 161 2900064A13Rik | chr2 | 1072  | 112307347 | 0.947901 | 0.385 | 0.415 |
| NM_175199    | 25  | 27  | 2   | 26 Actc1          | chr2 | 1390  | 113874942 | 0.607002 | 0     | 0.071 |
| NM_001040396 | 118 | 94  | 62  | 37 Mrg1           | chr2 | 2900  | 115890553 | 0.947901 | 0.639 | 0.626 |
| NM_133198    | 4   | 49  | 58  | 41 Srp14          | chr2 | 790   | 118305115 | 0.791261 | 0.462 | 0.586 |
| NM_026113    | 58  | 43  | 76  | 49 Disp2          | chr2 | 6430  | 118615568 | 0.14354  | 0.409 | 0.608 |
| NM_026914    | 20  | 14  | 46  | 53 Ccdc32         | chr2 | 1870  | 118852998 | 0.947901 | 0.5   | 0.465 |
| NM_133780    | 48  | 64  | 30  | 24 1200015F23Rik  | chr2 | 2170  | 118973185 | 0.780488 | 0.4   | 0.556 |
| NM_025598    | 40  | 47  | 25  | 38 Mapkbp1        | chr2 | 6943  | 119852056 | 0.947901 | 0.405 | 0.397 |
| NM_145542    | 27  | 28  | 13  | 21 Zfp106         | chr2 | 9100  | 120359323 | 0.947901 | 0.464 | 0.382 |
| NM_029861    | 47  | 45  | 39  | 42 Ccndbp1        | chr2 | 1572  | 120842192 | 0.947901 | 0.438 | 0.481 |
| NM_021559    | 11  | 21  | 64  | 57 Ascc311        | chr2 | 6740  | 127065882 | 0.696682 | 0.407 | 0.529 |
| NM_001081276 | 13  | 22  | 96  | 56 Tmem127        | chr2 | 4401  | 127083009 | 0.806139 | 0.537 | 0.632 |
| NM_025449    | 34  | 24  | 48  | 30 Tmem87b        | chr2 | 4631  | 128677556 | 0.511027 | 0.442 | 0.615 |
| NM_011289    | 149 | 119 | 31  | 14 Slc20a1        | chr2 | 3272  | 129036539 | 0.945732 | 0.6   | 0.689 |
| NM_026127    | 62  | 32  | 33  | 28 Nol5a          | chr2 | 1904  | 130101824 | 0.947901 | 0.576 | 0.541 |
| NM_009196    | 17  | 20  | 78  | 81 Idh3b          | chr2 | 1505  | 130109503 | 0.805861 | 0.428 | 0.491 |
| NM_028235    | 17  | 20  | 58  | 42 Vps16          | chr2 | 2617  | 130263697 | 0.846223 | 0.5   | 0.58  |
| NM_176987    | 16  | 13  | 79  | 97 Ptpra          | chr2 | 3070  | 130379165 | 0.562731 | 0.571 | 0.449 |
| NM_010910    | 17  | 17  | 74  | 63 4930402H24Rik  | chr2 | 4975  | 130646267 | 0.839655 | 0.622 | 0.54  |
| NM_009169    | 48  | 46  | 17  | 9 1700037H04Rik   | chr2 | 1241  | 130972173 | 0.947901 | 0.586 | 0.654 |
| NM_013855    | 60  | 64  | 19  | 22 Rnf24          | chr2 | 5498  | 131127809 | 0.947901 | 0.5   | 0.463 |
| NM_145557    | 8   | 19  | 34  | 36 Rassf2         | chr2 | 4646  | 131828677 | 0.947901 | 0.549 | 0.486 |
| NM_133348    | 139 | 111 | 79  | 31 Chgb           | chr2 | 2733  | 132618289 | 0.204536 | 0.572 | 0.718 |
| NM_025862    | 10  | 17  | 219 | 158 Snap25        | chr2 | 2135  | 136607140 | 0.947901 | 0.579 | 0.581 |
| NM_016860    | 162 | 154 | 119 | 106 Snrpb2        | chr2 | 1230  | 142890913 | 0.947901 | 0.494 | 0.529 |
| NM_028963    | 38  | 19  | 109 | 79 Pcsk2          | chr2 | 4720  | 143641474 | 0.947901 | 0.614 | 0.58  |
| NM_025463    | 77  | 62  | 233 | 187 Dstn          | chr2 | 1639  | 143767870 | 0.947901 | 0.559 | 0.555 |
| NM_146107    | 14  | 20  | 47  | 46 Snx5           | chr2 | 2375  | 144076019 | 0.947901 | 0.548 | 0.505 |
| NM_001032727 | 37  | 35  | 24  | 35 Polr3f         | chr2 | 4160  | 144367389 | 0.947901 | 0.423 | 0.407 |
| NM_025442    | 17  | 40  | 28  | 21 Cd93           | chr2 | 6638  | 148265467 | 0.86501  | 0.459 | 0.571 |
| NM_133749    | 15  | 24  | 28  | 37 Napb           | chr2 | 3693  | 148558078 | 0.947901 | 0.419 | 0.431 |
| NM_026203    | 104 | 98  | 43  | 22 Zfp120         | chr2 | 4096  | 149940211 | 0.947901 | 0.68  | 0.662 |
| NM_153563    | 42  | 37  | 16  | 21 Pygb           | chr2 | 3860  | 150655400 | 0.947901 | 0.356 | 0.432 |
| NM_178888    | 29  | 24  | 3   | 36 Abhd12         | chr2 | 1967  | 150672006 | 0.709822 | 0.176 | 0.077 |
| NM_201357    | 23  | 18  | 21  | 35 Nsf1c          | chr2 | 1355  | 151335272 | 0.447777 | 0.529 | 0.375 |
| NM_080633    | 49  | 47  | 31  | 21 Snph           | chr2 | 4689  | 151426725 | 0.947901 | 0.516 | 0.596 |

|              |     |     |      |                    |      |       |           |          |       |       |
|--------------|-----|-----|------|--------------------|------|-------|-----------|----------|-------|-------|
| NM_009451    | 849 | 176 | 33   | 31 Nrsn2           | chr2 | 1437  | 152199895 | 0.774973 | 0.402 | 0.516 |
| NM_207583    | 21  | 19  | 99   | 40 Pdrgr1          | chr2 | 1229  | 152834746 | 0.807174 | 0.648 | 0.712 |
| NM_007414    | 51  | 49  | 17   | 15 Tspyl3          | chr2 | 3070  | 153048467 | 0.947901 | 0.5   | 0.531 |
| NM_008388    | 46  | 47  | 27   | 16 Asxl1           | chr2 | 6674  | 153225408 | 0.947901 | 0.606 | 0.628 |
| NM_025605    | 25  | 25  | 12   | 65 8430427H17Rik   | chr2 | 5820  | 153246412 | 0.782756 | 0.265 | 0.156 |
| NM_025614    | 137 | 127 | 31   | 40 Commd7          | chr2 | 3467  | 153454974 | 0.844976 | 0.52  | 0.437 |
| NM_010726    | 34  | 36  | 218  | 164 Mapre1         | chr2 | 7330  | 153598445 | 0.945732 | 0.536 | 0.571 |
| NM_018800    | 25  | 19  | 92   | 23 Cbfa2t2         | chr2 | 6100  | 154363745 | 0.695724 | 0.688 | 0.8   |
| NM_134255    | 27  | 24  | 62   | 51 Ergic3          | chr2 | 1297  | 155841741 | 0.698719 | 0.457 | 0.549 |
| NM_026275    | 14  | 19  | 1379 | 1486 A930034L06Rik | chr2 | 5864  | 158211394 | 0.947901 | 0.486 | 0.481 |
| NM_009828    | 11  | 16  | 229  | 129 Ywhab          | chr2 | 2775  | 163843114 | 0.490713 | 0.721 | 0.64  |
| NM_027453    | 26  | 16  | 19   | 17 Ctsa            | chr2 | 3547  | 164666396 | 0.86501  | 0.655 | 0.528 |
| NM_007896    | 118 | 102 | 29   | 28 Elmo2           | chr2 | 4600  | 165140258 | 0.915297 | 0.429 | 0.509 |
| NM_146036    | 31  | 36  | 10   | 17 Zfp334          | chr2 | 5033  | 165204704 | 0.947901 | 0.333 | 0.37  |
| NM_172606    | 16  | 20  | 52   | 37 Cse1l           | chr2 | 3505  | 166771206 | 0.747754 | 0.482 | 0.584 |
| NM_008845    | 15  | 16  | 21   | 29 Stau1           | chr2 | 2996  | 166780499 | 0.751919 | 0.551 | 0.42  |
| NM_053102    | 78  | 62  | 25   | 23 B4galt5         | chr2 | 4205  | 167138710 | 0.947901 | 0.482 | 0.521 |
| NM_001039472 | 67  | 45  | 78   | 90 Zfp313          | chr2 | 3001  | 167340222 | 0.648107 | 0.554 | 0.464 |
| NM_027373    | 16  | 13  | 17   | 21 Ube2v1          | chr2 | 1950  | 167433177 | 0.947901 | 0.493 | 0.447 |
| NM_178745    | 192 | 126 | 14   | 12 Ptpn1           | chr2 | 4213  | 167800318 | 0.947901 | 0.552 | 0.538 |
| NM_011889    | 41  | 36  | 15   | 11 Atp9a           | chr2 | 3529  | 168474164 | 0.947901 | 0.54  | 0.577 |
| NM_026324    | 15  | 15  | 19   | 102 Vapb           | chr2 | 6969  | 173603621 | 0.780086 | 0.257 | 0.157 |
| NM_001037756 | 15  | 10  | 101  | 96 Gnas            | chr2 | 3733  | 174123878 | 0.805861 | 0.458 | 0.513 |
| NM_178347    | 20  | 24  | 61   | 53 Th1l            | chr2 | 2279  | 174250641 | 0.882217 | 0.453 | 0.535 |
| NM_001045533 | 27  | 23  | 177  | 164 Atp5e          | chr2 | 419   | 174288018 | 0.947901 | 0.527 | 0.519 |
| NM_029409    | 56  | 68  | 43   | 40 Phactr3         | chr2 | 2658  | 178070258 | 0.947901 | 0.568 | 0.518 |
| NM_009418    | 47  | 64  | 389  | 382 Psma7          | chr2 | 881   | 179773442 | 0.72737  | 0.54  | 0.505 |
| NM_008991    | 54  | 41  | 39   | 26 Rps21           | chr2 | 396   | 179992374 | 0.947901 | 0.533 | 0.6   |
| NM_025411    | 76  | 62  | 17   | 13 Cables2         | chr2 | 2945  | 179993431 | 0.947901 | 0.563 | 0.567 |
| NM_029654    | 18  | 16  | 25   | 23 C030019F02Rik   | chr2 | 944   | 180677759 | 0.86501  | 0.623 | 0.521 |
| NM_025623    | 14  | 11  | 13   | 23 Arfgap1         | chr2 | 2595  | 180715826 | 0.58647  | 0.593 | 0.361 |
| NM_026091    | 17  | 12  | 25   | 16 Chrna4          | chr2 | 4509  | 180763082 | 0.947901 | 0.686 | 0.61  |
| NM_001033286 | 12  | 14  | 94   | 110 2700038C09Rik  | chr2 | 797   | 180922089 | 0.947901 | 0.46  | 0.461 |
| NM_146093    | 22  | 12  | 38   | 81 Stmn3           | chr2 | 1136  | 181049195 | 0.194015 | 0.464 | 0.319 |
| NM_013884    | 35  | 36  | 15   | 19 Arfrp1          | chr2 | 2404  | 181092708 | 0.947901 | 0.378 | 0.441 |
| NM_025607    | 24  | 13  | 47   | 38 Dnajc5          | chr2 | 3674  | 181286200 | 0.84104  | 0.455 | 0.553 |
| NM_027457    | 12  | 27  | 37   | 20 Polr3k          | chr2 | 2925  | 181605105 | 0.947901 | 0.667 | 0.649 |
| NM_007466    | 19  | 7   | 99   | 69 Pkia            | chr3 | 3683  | 7442165   | 0.552476 | 0.444 | 0.589 |
| NM_018745    | 26  | 15  | 50   | 64 3110050N22Rik   | chr3 | 3361  | 7551577   | 0.915297 | 0.507 | 0.439 |
| NM_134141    | 25  | 20  | 89   | 79 Stmn2           | chr3 | 1904  | 8541914   | 0.947901 | 0.559 | 0.53  |
| NM_009698    | 131 | 177 | 41   | 21 Tpd52           | chr3 | 2293  | 8929745   | 0.602323 | 0.5   | 0.661 |
| NM_011787    | 40  | 35  | 124  | 153 Zfp704         | chr3 | 13849 | 9565087   | 0.204536 | 0.568 | 0.448 |
| NM_009602    | 27  | 27  | 34   | 20 Snx16           | chr3 | 2287  | 10420862  | 0.947901 | 0.586 | 0.63  |
| NM_009761    | 72  | 81  | 71   | 52 Armc1           | chr3 | 2955  | 19032240  | 0.947901 | 0.585 | 0.577 |
| NM_178737    | 127 | 64  | 17   | 25 Pde7a           | chr3 | 3165  | 19136522  | 0.877763 | 0.5   | 0.405 |
| NM_011801    | 21  | 24  | 233  | 141 Rpl22l1        | chr3 | 477   | 28705712  | 0.947901 | 0.605 | 0.623 |
| NM_175383    | 19  | 10  | 90   | 72 Tloc1           | chr3 | 3966  | 30717531  | 0.915297 | 0.634 | 0.556 |
| NM_026070    | 27  | 29  | 22   | 28 Prkci           | chr3 | 4465  | 30949212  | 0.947901 | 0.5   | 0.44  |
| NM_029505    | 35  | 31  | 31   | 30 Gnb4            | chr3 | 2753  | 32497066  | 0.411721 | 0.698 | 0.508 |
| NM_009804    | 21  | 23  | 17   | 10 Mrpl47          | chr3 | 850   | 32629050  | 0.947901 | 0.629 | 0.63  |
| NM_175003    | 76  | 35  | 23   | 6 Ttc14            | chr3 | 11072 | 33710230  | 0.844976 | 0.885 | 0.793 |
| NM_009658    | 61  | 14  | 43   | 11 Dcun1d1         | chr3 | 3545  | 35818002  | 0.161627 | 0.525 | 0.796 |

|              |     |     |     |     |               |      |      |           |          |       |       |
|--------------|-----|-----|-----|-----|---------------|------|------|-----------|----------|-------|-------|
| NM_019835    | 27  | 29  | 31  | 67  | Ccna2         | chr3 | 2827 | 36463910  | 0.924899 | 0.407 | 0.316 |
| NM_207219    | 37  | 31  | 45  | 128 | Exosc9        | chr3 | 1622 | 36464390  | 0.062787 | 0.405 | 0.26  |
| NM_029716    | 15  | 13  | 50  | 82  | Slc7a11       | chr3 | 9227 | 50239323  | 0.947901 | 0.318 | 0.379 |
| NM_009870    | 30  | 32  | 93  | 59  | Rab33b        | chr3 | 3488 | 51299072  | 0.947901 | 0.592 | 0.612 |
| NM_133700    | 20  | 14  | 30  | 16  | Cog6          | chr3 | 2920 | 52821072  | 0.947901 | 0.65  | 0.652 |
| NM_025821    | 44  | 49  | 33  | 22  | Lhfp          | chr3 | 2107 | 53065376  | 0.947901 | 0.531 | 0.6   |
| NM_175454    | 44  | 9   | 30  | 32  | Exosc8        | chr3 | 1316 | 54532686  | 0.947901 | 0.512 | 0.484 |
| NM_175642    | 25  | 35  | 17  | 28  | Alg5          | chr3 | 1471 | 54550495  | 0.945732 | 0.298 | 0.378 |
| NM_007684    | 53  | 48  | 45  | 18  | Rfxap         | chr3 | 2185 | 54608327  | 0.947901 | 0.68  | 0.714 |
| NM_029846    | 16  | 9   | 32  | 12  | Commd2        | chr3 | 2961 | 57454006  | 0.785646 | 0.615 | 0.727 |
| NM_153557    | 18  | 11  | 168 | 135 | 2810407C02Rik | chr3 | 3575 | 58395344  | 0.947901 | 0.557 | 0.554 |
| NM_007509    | 37  | 105 | 26  | 21  | Rap2b         | chr3 | 4197 | 61169218  | 0.817803 | 0.429 | 0.553 |
| NM_021492    | 68  | 54  | 176 | 83  | Serpini1      | chr3 | 2944 | 75418507  | 0.409809 | 0.574 | 0.68  |
| NM_009723    | 13  | 16  | 46  | 52  | Ppid          | chr3 | 1728 | 79407507  | 0.805861 | 0.554 | 0.469 |
| NM_009680    | 15  | 11  | 282 | 364 | Gria2         | chr3 | 6841 | 80545008  | 0.381503 | 0.533 | 0.437 |
| NM_145851    | 18  | 14  | 52  | 46  | Glrb          | chr3 | 2988 | 80664171  | 0.947901 | 0.559 | 0.531 |
| NM_013472    | 18  | 14  | 81  | 46  | Gucy1a3       | chr3 | 4722 | 81948843  | 0.342045 | 0.485 | 0.638 |
| NM_026009    | 23  | 14  | 32  | 21  | Plrg1         | chr3 | 1771 | 82876144  | 0.947901 | 0.56  | 0.604 |
| NM_001081960 | 81  | 87  | 27  | 25  | Trim2         | chr3 | 7177 | 83997190  | 0.947901 | 0.538 | 0.519 |
| NM_028386    | 33  | 34  | 70  | 43  | Dclk2         | chr3 | 4061 | 86709876  | 0.750419 | 0.518 | 0.619 |
| NM_026396    | 22  | 24  | 15  | 27  | Crabp2        | chr3 | 900  | 87756948  | 0.947901 | 0.36  | 0.357 |
| NM_153508    | 25  | 30  | 11  | 14  | Ubqln4        | chr3 | 3372 | 88372225  | 0.947901 | 0.529 | 0.44  |
| NM_013799    | 50  | 36  | 37  | 29  | 2810403A07Rik | chr3 | 2964 | 88502813  | 0.774973 | 0.689 | 0.561 |
| NM_194462    | 43  | 48  | 426 | 305 | Syt11         | chr3 | 4585 | 88576371  | 0.151666 | 0.487 | 0.583 |
| NM_007620    | 32  | 14  | 17  | 13  | Msto1         | chr3 | 1791 | 88716673  | 0.947901 | 0.643 | 0.567 |
| NM_025983    | 164 | 147 | 59  | 37  | Rusc1         | chr3 | 3388 | 88895966  | 0.805861 | 0.484 | 0.615 |
| NM_133766    | 29  | 14  | 32  | 21  | Fdps          | chr3 | 1223 | 88904636  | 0.947901 | 0.647 | 0.604 |
| NM_026487    | 39  | 27  | 34  | 20  | Hcn3          | chr3 | 3268 | 88956967  | 0.774044 | 0.774 | 0.63  |
| NM_024166    | 60  | 21  | 16  | 10  | Scamp3        | chr3 | 1482 | 88986307  | 0.947901 | 0.584 | 0.615 |
| NM_007471    | 121 | 130 | 69  | 39  | Trim46        | chr3 | 2731 | 89046146  | 0.573356 | 0.5   | 0.639 |
| NM_019767    | 49  | 37  | 67  | 81  | Krtcap2       | chr3 | 516  | 89053636  | 0.74999  | 0.537 | 0.453 |
| NM_019665    | 24  | 16  | 132 | 114 | Pmvk          | chr3 | 989  | 89271490  | 0.719377 | 0.6   | 0.537 |
| NM_028840    | 31  | 22  | 69  | 53  | Adar          | chr3 | 5870 | 89555713  | 0.744899 | 0.459 | 0.566 |
| NM_016778    | 25  | 15  | 44  | 48  | Chrn2         | chr3 | 5358 | 89566935  | 0.947901 | 0.5   | 0.478 |
| NM_009689    | 16  | 15  | 26  | 5   | 4933434E20Rik | chr3 | 1504 | 89865638  | 0.947901 | 0.8   | 0.839 |
| NM_024173    | 91  | 91  | 19  | 13  | Tpm3          | chr3 | 1906 | 89903790  | 0.826184 | 0.466 | 0.594 |
| NM_184053    | 83  | 91  | 105 | 121 | Ilf2          | chr3 | 1973 | 90292238  | 0.947901 | 0.493 | 0.465 |
| NM_015730    | 24  | 11  | 43  | 69  | Snapap        | chr3 | 1898 | 90294487  | 0.947901 | 0.355 | 0.384 |
| NM_183165    | 16  | 17  | 53  | 70  | 2500003M10Rik | chr3 | 3247 | 90310604  | 0.947901 | 0.488 | 0.431 |
| NM_025272    | 53  | 36  | 59  | 40  | Snx27         | chr3 | 6259 | 94305716  | 0.805861 | 0.524 | 0.596 |
| NM_007636    | 90  | 59  | 27  | 34  | Psemb4        | chr3 | 923  | 94690005  | 0.947901 | 0.465 | 0.443 |
| NM_010761    | 21  | 27  | 12  | 13  | Prune         | chr3 | 3160 | 95085562  | 0.947901 | 0.486 | 0.48  |
| NM_001024602 | 15  | 23  | 15  | 17  | Ensa          | chr3 | 2276 | 95433673  | 0.890049 | 0.6   | 0.469 |
| NM_009829    | 78  | 19  | 13  | 12  | Prpf3         | chr3 | 2732 | 95659633  | 0.947901 | 0.536 | 0.52  |
| NM_029702    | 17  | 28  | 99  | 90  | Mrps21        | chr3 | 427  | 95674488  | 0.603385 | 0.41  | 0.524 |
| NM_054052    | 14  | 12  | 21  | 25  | Anp32e        | chr3 | 2826 | 95749478  | 0.92262  | 0.553 | 0.457 |
| NM_199310    | 47  | 47  | 19  | 17  | Pex11b        | chr3 | 1580 | 96447630  | 0.947901 | 0.517 | 0.528 |
| NM_007437    | 21  | 18  | 7   | 26  | Prkab2        | chr3 | 4278 | 97474034  | 0.176806 | 0.524 | 0.212 |
| NM_001080384 | 28  | 29  | 45  | 20  | Wdr3          | chr3 | 3458 | 99966272  | 0.947901 | 0.655 | 0.692 |
| NM_145221    | 25  | 22  | 41  | 27  | Gdap2         | chr3 | 2871 | 100005953 | 0.58647  | 0.421 | 0.603 |
| NM_007461    | 27  | 15  | 83  | 54  | Igsf3         | chr3 | 4565 | 101261778 | 0.520239 | 0.733 | 0.606 |
| NM_146033    | 279 | 220 | 78  | 549 | Csde1         | chr3 | 4130 | 102859344 | 0.290673 | 0.188 | 0.124 |



|              |     |     |     |     |               |      |       |           |          |       |       |
|--------------|-----|-----|-----|-----|---------------|------|-------|-----------|----------|-------|-------|
| NM_011792    | 53  | 27  | 34  | 36  | Syt6          | chr3 | 4416  | 103436452 | 0.933057 | 0.568 | 0.486 |
| NM_015731    | 67  | 57  | 28  | 47  | Lrig2         | chr3 | 7134  | 104298033 | 0.833193 | 0.263 | 0.373 |
| NM_027404    | 26  | 18  | 41  | 34  | Slc16a1       | chr3 | 4426  | 104460634 | 0.941663 | 0.459 | 0.547 |
| NM_007596    | 21  | 12  | 23  | 26  | Kcnd3         | chr3 | 7182  | 105262174 | 0.947901 | 0.532 | 0.469 |
| NM_173016    | 52  | 40  | 68  | 6   | 6530418L21Rik | chr3 | 3538  | 105522281 | 0.067764 | 0.654 | 0.919 |
| NM_019718    | 208 | 238 | 58  | 37  | Wdr77         | chr3 | 3553  | 105770293 | 0.668559 | 0.712 | 0.611 |
| NM_144869    | 19  | 18  | 43  | 42  | Slc6a17       | chr3 | 6326  | 107303446 | 0.947431 | 0.571 | 0.506 |
| NM_144558    | 66  | 68  | 49  | 35  | 6330569M22Rik | chr3 | 3235  | 107427544 | 0.947901 | 0.532 | 0.583 |
| NM_015740    | 49  | 51  | 127 | 106 | Ahcyl1        | chr3 | 3866  | 107476947 | 0.947901 | 0.491 | 0.545 |
| NM_009672    | 12  | 16  | 101 | 58  | Gstm5         | chr3 | 911   | 107701122 | 0.318235 | 0.456 | 0.635 |
| NM_007586    | 16  | 36  | 43  | 27  | Gstm1         | chr3 | 1286  | 107819504 | 0.947901 | 0.574 | 0.614 |
| NM_007581    | 26  | 27  | 57  | 40  | Gnai3         | chr3 | 3211  | 107926471 | 0.947901 | 0.545 | 0.588 |
| NM_207678    | 18  | 20  | 42  | 36  | Psma5         | chr3 | 1217  | 108082661 | 0.947901 | 0.533 | 0.538 |
| NM_146124    | 15  | 13  | 52  | 18  | Celsr2        | chr3 | 10543 | 108215323 | 0.617974 | 0.576 | 0.743 |
| NM_011789    | 49  | 36  | 113 | 231 | Wdr47         | chr3 | 4096  | 108447470 | 0.525209 | 0.431 | 0.328 |
| NM_009685    | 16  | 10  | 57  | 34  | Extl2         | chr3 | 2840  | 115729949 | 0.525209 | 0.46  | 0.626 |
| NM_007687    | 58  | 39  | 92  | 73  | Rtcd1         | chr3 | 1493  | 116210926 | 0.947901 | 0.532 | 0.558 |
| NM_001082483 | 47  | 55  | 57  | 43  | D3Bwg0562e    | chr3 | 5706  | 117038393 | 0.947901 | 0.577 | 0.57  |
| NM_018742    | 26  | 21  | 41  | 34  | 4833424O15Rik | chr3 | 4044  | 117323967 | 0.947901 | 0.583 | 0.547 |
| NM_133764    | 228 | 179 | 10  | 21  | Alg14         | chr3 | 910   | 121064566 | 0.807174 | 0.445 | 0.323 |
| NM_008144    | 22  | 15  | 29  | 26  | Cnn3          | chr3 | 2003  | 121160245 | 0.947901 | 0.569 | 0.527 |
| NM_178645    | 45  | 42  | 67  | 50  | Abcd3         | chr3 | 3399  | 121482487 | 0.947901 | 0.568 | 0.573 |
| NM_001039939 | 20  | 13  | 24  | 22  | Arhgap29      | chr3 | 5133  | 121693983 | 0.751955 | 0.692 | 0.522 |
| NM_009686    | 24  | 9   | 20  | 26  | G430022H21Rik | chr3 | 2595  | 123088719 | 0.525209 | 0.613 | 0.435 |
| NM_009721    | 21  | 16  | 56  | 42  | Camk2d        | chr3 | 4286  | 126541229 | 0.805361 | 0.694 | 0.571 |
| NM_175312    | 18  | 11  | 287 | 184 | Ank2          | chr3 | 5790  | 126684813 | 0.929497 | 0.578 | 0.609 |
| NM_009795    | 56  | 66  | 27  | 14  | Larp7         | chr3 | 2135  | 127249226 | 0.947901 | 0.667 | 0.659 |
| NM_001081378 | 209 | 254 | 75  | 43  | Elovl6        | chr3 | 5951  | 129338189 | 0.947901 | 0.672 | 0.636 |
| NM_172717    | 31  | 15  | 52  | 31  | Sec24b        | chr3 | 4702  | 129743614 | 0.947901 | 0.647 | 0.627 |
| NM_021505    | 107 | 73  | 39  | 89  | 2310008M10Rik | chr3 | 1066  | 130412183 | 0.286602 | 0.471 | 0.305 |
| NM_029007    | 17  | 11  | 25  | 19  | Scye1         | chr3 | 1122  | 132346765 | 0.86501  | 0.476 | 0.568 |
| NM_029277    | 16  | 17  | 57  | 66  | Ppa2          | chr3 | 1225  | 133040903 | 0.652252 | 0.564 | 0.463 |
| NM_198111    | 35  | 16  | 37  | 14  | Tspan5        | chr3 | 3172  | 138566253 | 0.078999 | 0.417 | 0.725 |
| NM_016843    | 16  | 19  | 114 | 40  | Rap1gds1      | chr3 | 3516  | 138713490 | 0.841387 | 0.681 | 0.74  |
| NM_007590    | 394 | 147 | 22  | 33  | Hs2st1        | chr3 | 4748  | 144128152 | 0.947901 | 0.429 | 0.4   |
| NM_146247    | 33  | 40  | 322 | 276 | Sep15         | chr3 | 1515  | 144259864 | 0.947901 | 0.557 | 0.538 |
| NM_172635    | 31  | 9   | 113 | 40  | Lphn2         | chr3 | 6052  | 148553471 | 0.86501  | 0.667 | 0.739 |
| NM_028717    | 26  | 22  | 44  | 73  | Fubp1         | chr3 | 6491  | 151895528 | 0.186303 | 0.655 | 0.376 |
| NM_146168    | 12  | 13  | 53  | 16  | Zzz3          | chr3 | 7601  | 152124214 | 0.870583 | 0.843 | 0.768 |
| NM_144885    | 37  | 24  | 68  | 82  | Negr1         | chr3 | 4985  | 156679173 | 0.945732 | 0.39  | 0.453 |
| NM_011811    | 13  | 16  | 83  | 22  | Rps20         | chr4 | 502   | 3761623   | 0.947901 | 0.817 | 0.79  |
| NM_153195    | 17  | 8   | 40  | 25  | Sdcbp         | chr4 | 2550  | 6320175   | 0.947901 | 0.63  | 0.615 |
| NM_053204    | 20  | 16  | 46  | 35  | Nsmaf         | chr4 | 3494  | 6362228   | 0.947901 | 0.58  | 0.568 |
| NM_153585    | 48  | 22  | 8   | 22  | Rab2          | chr4 | 2057  | 8488306   | 0.112395 | 0.636 | 0.267 |
| NM_010027    | 32  | 17  | 146 | 76  | 6720467C03Rik | chr4 | 1349  | 12098326  | 0.805861 | 0.745 | 0.658 |
| NM_177664    | 30  | 22  | 50  | 37  | Otud6b        | chr4 | 3311  | 14745385  | 0.744899 | 0.432 | 0.575 |
| NM_023314    | 20  | 15  | 27  | 12  | Fut9          | chr4 | 11990 | 25547590  | 0.947901 | 0.727 | 0.692 |
| NM_001039514 | 22  | 23  | 52  | 52  | Ube2j1        | chr4 | 3522  | 33136675  | 0.844976 | 0.59  | 0.5   |
| NM_010926    | 28  | 18  | 26  | 32  | Orc3l         | chr4 | 3793  | 34562144  | 0.381503 | 0.644 | 0.448 |
| NM_026065    | 442 | 382 | 45  | 18  | 1810030N24Rik | chr4 | 927   | 34725511  | 0.677707 | 0.538 | 0.714 |
| NM_133769    | 19  | 27  | 19  | 16  | Aco1          | chr4 | 4319  | 40144646  | 0.625773 | 0.727 | 0.543 |
| NM_153166    | 70  | 65  | 44  | 60  | Dnaja1        | chr4 | 3323  | 40680388  | 0.395208 | 0.585 | 0.423 |

|              |     |     |     |     |               |      |      |           |          |       |       |
|--------------|-----|-----|-----|-----|---------------|------|------|-----------|----------|-------|-------|
| NM_013492    | 57  | 39  | 36  | 30  | Chmp5         | chr4 | 1372 | 40911633  | 0.093787 | 0.331 | 0.545 |
| NM_133833    | 27  | 42  | 23  | 21  | Ube2r2        | chr4 | 3312 | 41138419  | 0.945732 | 0.424 | 0.523 |
| NM_028194    | 24  | 11  | 19  | 14  | Wdr40a        | chr4 | 3402 | 41238435  | 0.947901 | 0.552 | 0.576 |
| NM_008033    | 31  | 23  | 38  | 32  | Unc13b        | chr4 | 6374 | 43276000  | 0.947901 | 0.51  | 0.543 |
| NM_138677    | 5   | 45  | 34  | 39  | Ctla          | chr4 | 1109 | 44045297  | 0.947901 | 0.491 | 0.466 |
| NM_009923    | 30  | 15  | 38  | 39  | Rnf38         | chr4 | 5040 | 44156446  | 0.121045 | 0.688 | 0.494 |
| NM_197982    | 14  | 135 | 129 | 109 | D4Wsu132e     | chr4 | 3203 | 44944082  | 0.80737  | 0.468 | 0.542 |
| NM_019794    | 14  | 12  | 24  | 38  | Zbtb5         | chr4 | 4219 | 45004137  | 0.877306 | 0.307 | 0.387 |
| NM_130450    | 78  | 38  | 54  | 33  | Igfbp1        | chr4 | 2729 | 45826267  | 0.947901 | 0.602 | 0.621 |
| NM_030205    | 10  | 20  | 180 | 30  | Tmeff1        | chr4 | 2442 | 48675159  | 0.329905 | 0.722 | 0.857 |
| NM_013509    | 20  | 11  | 37  | 53  | Mrpl50        | chr4 | 2103 | 49527284  | 0.947901 | 0.485 | 0.411 |
| NM_146099    | 31  | 14  | 61  | 34  | 2810432L12Rik | chr4 | 2847 | 49597809  | 0.72737  | 0.519 | 0.642 |
| NM_010174    | 55  | 21  | 32  | 14  | Rnf20         | chr4 | 4172 | 49668354  | 0.947901 | 0.633 | 0.696 |
| NM_153743    | 121 | 97  | 30  | 15  | Nipsnap3a     | chr4 | 1507 | 53034281  | 0.929452 | 0.56  | 0.667 |
| NM_029976    | 23  | 20  | 33  | 87  | Txn1          | chr4 | 1051 | 57956580  | 0.712972 | 0.405 | 0.275 |
| NM_024181    | 23  | 24  | 49  | 39  | Gng10         | chr4 | 1120 | 59053958  | 0.893596 | 0.635 | 0.557 |
| NM_013902    | 195 | 220 | 15  | 16  | Ugcg          | chr4 | 3719 | 59234115  | 0.947901 | 0.441 | 0.484 |
| NM_172625    | 16  | 12  | 22  | 31  | Snx30         | chr4 | 7507 | 59914751  | 0.653115 | 0.567 | 0.415 |
| NM_030238    | 368 | 258 | 90  | 100 | Atp6v1g1      | chr4 | 1104 | 63211163  | 0.947901 | 0.5   | 0.474 |
| NM_008010    | 15  | 11  | 42  | 17  | Tnc           | chr4 | 6834 | 63681233  | 0.947901 | 0.658 | 0.712 |
| NM_013932    | 11  | 15  | 234 | 259 | Trim32        | chr4 | 3184 | 65274199  | 0.805861 | 0.537 | 0.475 |
| NM_134469    | 33  | 18  | 50  | 43  | Tle1          | chr4 | 4308 | 71830228  | 0.947901 | 0.475 | 0.538 |
| NM_178896    | 21  | 12  | 7   | 20  | 3110001D03Rik | chr4 | 769  | 74923396  | 0.801072 | 0.417 | 0.259 |
| NM_001081490 | 21  | 13  | 20  | 18  | Sh3gl2        | chr4 | 2817 | 85034761  | 0.947901 | 0.564 | 0.526 |
| NM_028013    | 26  | 15  | 66  | 49  | Mllt3         | chr4 | 4793 | 87452182  | 0.947901 | 0.621 | 0.574 |
| NM_148948    | 11  | 19  | 75  | 76  | Mysm1         | chr4 | 7420 | 94637217  | 0.859534 | 0.607 | 0.497 |
| NM_009984    | 13  | 18  | 32  | 49  | Dock7         | chr4 | 7043 | 98756219  | 0.604997 | 0.553 | 0.395 |
| NM_007960    | 25  | 15  | 43  | 31  | Pgm2          | chr4 | 2302 | 99659569  | 0.947901 | 0.61  | 0.581 |
| NM_001081191 | 56  | 50  | 154 | 95  | Jak1          | chr4 | 5299 | 100866411 | 0.947901 | 0.628 | 0.618 |
| NM_145139    | 135 | 114 | 77  | 44  | Dnajc6        | chr4 | 5225 | 101311888 | 0.947901 | 0.645 | 0.636 |
| NM_145422    | 27  | 28  | 56  | 46  | Leprot        | chr4 | 1827 | 101331621 | 0.710828 | 0.662 | 0.549 |
| NM_016903    | 106 | 97  | 39  | 34  | Pde4b         | chr4 | 4371 | 102277818 | 0.947901 | 0.579 | 0.534 |
| NM_017477    | 42  | 37  | 41  | 22  | Ppap2b        | chr4 | 3162 | 104829988 | 0.279798 | 0.417 | 0.651 |
| NM_011431    | 20  | 11  | 18  | 17  | Dhcr24        | chr4 | 4028 | 106260236 | 0.947901 | 0.557 | 0.514 |
| NM_175276    | 11  | 15  | 21  | 8   | Ttc4          | chr4 | 2085 | 106351406 | 0.947901 | 0.692 | 0.724 |
| NM_013908    | 27  | 24  | 40  | 27  | Ssbp3         | chr4 | 3211 | 106720893 | 0.947901 | 0.61  | 0.597 |
| NM_198412    | 20  | 11  | 23  | 32  | Lrp8          | chr4 | 7674 | 107546208 | 0.915297 | 0.513 | 0.418 |
| NM_019771    | 174 | 137 | 67  | 59  | 0610037L13Rik | chr4 | 1551 | 107569729 | 0.947901 | 0.521 | 0.532 |
| NM_053090    | 18  | 24  | 35  | 30  | Btf3l4        | chr4 | 3111 | 108503162 | 0.945732 | 0.619 | 0.538 |
| NM_027270    | 40  | 37  | 154 | 132 | Rab3b         | chr4 | 3320 | 108615798 | 0.947901 | 0.569 | 0.538 |
| NM_134040    | 20  | 18  | 24  | 35  | Faf1          | chr4 | 4452 | 109635718 | 0.805861 | 0.545 | 0.407 |
| NM_026225    | 39  | 21  | 367 | 285 | Prdx1         | chr4 | 1417 | 116371925 | 0.194319 | 0.488 | 0.563 |
| NM_011807    | 22  | 21  | 22  | 23  | Prnpip1       | chr4 | 1576 | 117287813 | 0.871565 | 0.591 | 0.489 |
| NM_021449    | 14  | 19  | 17  | 16  | Ebna1bp2      | chr4 | 2941 | 118299899 | 0.464992 | 0.341 | 0.515 |
| NM_013494    | 25  | 12  | 24  | 42  | Ybx1          | chr4 | 2191 | 118954774 | 0.381503 | 0.503 | 0.364 |
| NM_010103    | 51  | 38  | 46  | 46  | Ctps          | chr4 | 2681 | 120225599 | 0.947901 | 0.534 | 0.5   |
| NM_011991    | 15  | 10  | 271 | 34  | Ppie          | chr4 | 1168 | 122807685 | 0.280466 | 0.817 | 0.889 |
| NM_198303    | 47  | 31  | 30  | 20  | Hpcal4        | chr4 | 4652 | 122870503 | 0.947901 | 0.568 | 0.6   |
| NM_001003908 | 22  | 21  | 95  | 153 | Ndufs5        | chr4 | 540  | 123395359 | 0.065669 | 0.517 | 0.383 |
| NM_025785    | 16  | 14  | 17  | 14  | Rragc         | chr4 | 2621 | 123612913 | 0.947901 | 0.614 | 0.548 |
| NM_001080932 | 24  | 28  | 16  | 13  | Utp11l        | chr4 | 953  | 124370756 | 0.947901 | 0.469 | 0.552 |
| NM_023047    | 22  | 13  | 24  | 18  | 1810007P19Rik | chr4 | 2152 | 125766520 | 0.945732 | 0.646 | 0.571 |



|              |     |     |     |     |               |      |       |           |          |       |       |
|--------------|-----|-----|-----|-----|---------------|------|-------|-----------|----------|-------|-------|
| NM_007930    | 139 | 181 | 54  | 31  | Lsm10         | chr4 | 869   | 125775321 | 0.947901 | 0.597 | 0.635 |
| NM_001081419 | 23  | 18  | 16  | 19  | Thrap3        | chr4 | 4350  | 125863711 | 0.865057 | 0.555 | 0.457 |
| NM_001038619 | 82  | 61  | 77  | 46  | Trim62        | chr4 | 3216  | 128586284 | 0.92412  | 0.569 | 0.626 |
| NM_001080797 | 27  | 28  | 43  | 42  | Yars          | chr4 | 2874  | 128895834 | 0.947901 | 0.5   | 0.506 |
| NM_027922    | 43  | 31  | 37  | 39  | Rbbp4         | chr4 | 4407  | 128999107 | 0.744899 | 0.654 | 0.487 |
| NM_021356    | 20  | 20  | 126 | 124 | Zbtb8os       | chr4 | 660   | 129024165 | 0.947901 | 0.527 | 0.504 |
| NM_007861    | 84  | 102 | 14  | 22  | Eif3s2        | chr4 | 1114  | 129277677 | 0.866345 | 0.5   | 0.389 |
| NM_001025192 | 73  | 63  | 66  | 39  | Ccdc28b       | chr4 | 856   | 129299867 | 0.617761 | 0.541 | 0.629 |
| NM_009931    | 59  | 47  | 89  | 44  | Ptp4a2        | chr4 | 2789  | 129526298 | 0.252235 | 0.494 | 0.669 |
| NM_026695    | 48  | 47  | 12  | 14  | Pef1          | chr4 | 1551  | 129802314 | 0.947901 | 0.515 | 0.462 |
| NM_133916    | 19  | 32  | 49  | 16  | Fabp3         | chr4 | 669   | 129992701 | 0.947901 | 0.724 | 0.754 |
| NM_010243    | 24  | 9   | 17  | 11  | Wdr57         | chr4 | 1613  | 130067093 | 0.947901 | 0.581 | 0.607 |
| NM_080285    | 28  | 15  | 120 | 65  | Sdc3          | chr4 | 4972  | 130379466 | 0.616107 | 0.543 | 0.649 |
| NM_053272    | 39  | 31  | 670 | 469 | Stmn1         | chr4 | 965   | 134029551 | 0.844976 | 0.605 | 0.588 |
| NM_009818    | 36  | 21  | 15  | 43  | 2410166105Rik | chr4 | 1836  | 134088122 | 0.563807 | 0.414 | 0.259 |
| NM_010201    | 22  | 15  | 33  | 30  | Tmem57        | chr4 | 3843  | 134386471 | 0.947901 | 0.486 | 0.524 |
| NM_183171    | 38  | 32  | 117 | 119 | Tmem50a       | chr4 | 1117  | 134465572 | 0.947901 | 0.471 | 0.496 |
| NM_009940    | 55  | 52  | 35  | 16  | Syf2          | chr4 | 1276  | 134492955 | 0.296511 | 0.458 | 0.686 |
| NM_027148    | 21  | 20  | 64  | 42  | Rcan3         | chr4 | 5062  | 134981360 | 0.947901 | 0.598 | 0.604 |
| NM_028044    | 82  | 62  | 35  | 14  | Fuca1         | chr4 | 2503  | 135495156 | 0.104358 | 0.442 | 0.714 |
| NM_172442    | 23  | 11  | 36  | 26  | 1110049F12Rik | chr4 | 1554  | 135531634 | 0.947901 | 0.551 | 0.581 |
| NM_146087    | 42  | 35  | 20  | 39  | Aof2          | chr4 | 2999  | 136148893 | 0.482412 | 0.506 | 0.339 |
| NM_138587    | 76  | 77  | 162 | 106 | Sdhb          | chr4 | 1091  | 140534966 | 0.750419 | 0.554 | 0.604 |
| NM_007759    | 9   | 16  | 21  | 23  | Casp9         | chr4 | 3896  | 141371691 | 0.444564 | 0.719 | 0.477 |
| NM_007805    | 14  | 13  | 103 | 74  | Pdpm          | chr4 | 1769  | 142857383 | 0.617974 | 0.473 | 0.582 |
| NM_026170    | 27  | 24  | 75  | 130 | Park7         | chr4 | 878   | 150281248 | 0.947901 | 0.405 | 0.366 |
| NM_172920    | 16  | 14  | 90  | 83  | Camta1        | chr4 | 8423  | 150518187 | 0.944988 | 0.577 | 0.52  |
| NM_001025947 | 25  | 25  | 125 | 117 | Acot7         | chr4 | 1452  | 151580897 | 0.922218 | 0.556 | 0.517 |
| NM_025648    | 7   | 26  | 24  | 20  | Rpl22         | chr4 | 2081  | 151707487 | 0.947901 | 0.519 | 0.545 |
| NM_138583    | 21  | 20  | 41  | 22  | Lrrc47        | chr4 | 3395  | 153394423 | 0.719164 | 0.51  | 0.651 |
| NM_013716    | 14  | 13  | 25  | 28  | Wdr8          | chr4 | 1600  | 153530274 | 0.947901 | 0.486 | 0.472 |
| NM_016856    | 56  | 29  | 78  | 66  | 1200015A19Rik | chr4 | 1756  | 153531617 | 0.43881  | 0.426 | 0.542 |
| NM_001007571 | 82  | 91  | 13  | 16  | Gnb1          | chr4 | 2834  | 154931629 | 0.75561  | 0.587 | 0.448 |
| NM_015744    | 24  | 16  | 23  | 33  | Nadk          | chr4 | 2943  | 154961491 | 0.947901 | 0.471 | 0.411 |
| NM_016772    | 75  | 55  | 18  | 14  | Ccnl2         | chr4 | 2442  | 155197679 | 0.947901 | 0.474 | 0.563 |
| NM_019936    | 125 | 91  | 104 | 140 | Aurkaip1      | chr4 | 793   | 155205802 | 0.465109 | 0.519 | 0.426 |
| NM_027652    | 56  | 102 | 25  | 16  | BC002216      | chr4 | 2662  | 155243426 | 0.749267 | 0.444 | 0.61  |
| NM_016748    | 31  | 27  | 10  | 21  | Cpsf3l        | chr4 | 2347  | 155261018 | 0.58691  | 0.543 | 0.323 |
| NM_007798    | 35  | 36  | 48  | 48  | Sdf4          | chr4 | 5174  | 155387349 | 0.602323 | 0.648 | 0.5   |
| NM_025869    | 17  | 13  | 15  | 37  | 9430015G10Rik | chr4 | 2539  | 155499572 | 0.947901 | 0.296 | 0.288 |
| NM_029653    | 24  | 9   | 324 | 236 | Agrn          | chr4 | 6866  | 155559234 | 0.760279 | 0.528 | 0.579 |
| NM_010047    | 19  | 15  | 26  | 14  | Klhl17        | chr4 | 2679  | 155603699 | 0.833193 | 0.515 | 0.65  |
| NM_172380    | 35  | 22  | 64  | 64  | Akap9         | chr5 | 12105 | 4079780   | 0.947901 | 0.473 | 0.5   |
| NM_026365    | 21  | 21  | 18  | 21  | Pftk1         | chr5 | 4911  | 5195357   | 0.860132 | 0.6   | 0.462 |
| NM_031156    | 23  | 21  | 133 | 101 | Gnai1         | chr5 | 3193  | 17797427  | 0.780086 | 0.481 | 0.568 |
| NM_146100    | 17  | 9   | 57  | 55  | Psmc2         | chr5 | 1782  | 21308907  | 0.805861 | 0.6   | 0.509 |
| NM_029626    | 39  | 25  | 129 | 171 | Reln          | chr5 | 11702 | 21516989  | 0.281941 | 0.574 | 0.43  |
| NM_010825    | 39  | 22  | 83  | 86  | Srpk2         | chr5 | 6436  | 23030336  | 0.947901 | 0.526 | 0.491 |
| NM_020295    | 14  | 12  | 39  | 43  | Drctnnb1a     | chr5 | 5652  | 23497592  | 0.947901 | 0.429 | 0.476 |
| NM_029665    | 15  | 12  | 34  | 20  | Abcf2         | chr5 | 2488  | 24076962  | 0.825272 | 0.519 | 0.63  |
| NM_010317    | 46  | 18  | 79  | 100 | Dpp6          | chr5 | 3842  | 28036063  | 0.433765 | 0.571 | 0.441 |
| NM_001025245 | 22  | 6   | 22  | 22  | Lmbr1         | chr5 | 4949  | 29704873  | 0.947901 | 0.538 | 0.5   |

|              |     |     |     |                  |      |       |           |          |       |       |
|--------------|-----|-----|-----|------------------|------|-------|-----------|----------|-------|-------|
| NM_008143    | 17  | 17  | 72  | 38 Ube3c         | chr5 | 5033  | 30001600  | 0.381503 | 0.52  | 0.655 |
| NM_172529    | 11  | 15  | 39  | 29 Hadhb         | chr5 | 1963  | 30507499  | 0.47658  | 0.389 | 0.574 |
| NM_010716    | 14  | 18  | 103 | 165 D5Wsu178e    | chr5 | 6769  | 30593923  | 0.947901 | 0.354 | 0.384 |
| NM_026148    | 17  | 13  | 51  | 30 Dpysl5        | chr5 | 5077  | 31101004  | 0.947901 | 0.629 | 0.63  |
| NM_027898    | 54  | 141 | 26  | 29 1110039B18Rik | chr5 | 2762  | 31179073  | 0.543527 | 0.676 | 0.473 |
| NM_021554    | 19  | 25  | 15  | 23 Ppm1g         | chr5 | 2165  | 31508582  | 0.947901 | 0.445 | 0.395 |
| NM_023331    | 102 | 83  | 22  | 11 Xab1          | chr5 | 1847  | 31813339  | 0.947901 | 0.739 | 0.667 |
| NM_001081279 | 22  | 9   | 29  | 22 Ppp1cb        | chr5 | 4024  | 32794133  | 0.947901 | 0.524 | 0.569 |
| NM_020590    | 32  | 26  | 85  | 145 Pisd         | chr5 | 2150  | 33117087  | 0.165895 | 0.496 | 0.37  |
| NM_028185    | 49  | 60  | 19  | 20 Fgfr3         | chr5 | 4214  | 34078898  | 0.947901 | 0.577 | 0.487 |
| NM_011941    | 17  | 25  | 42  | 21 Letm1         | chr5 | 3480  | 34125229  | 0.947901 | 0.658 | 0.667 |
| NM_177301    | 14  | 27  | 88  | 55 Rnf4          | chr5 | 2936  | 34693939  | 0.738849 | 0.513 | 0.615 |
| NM_001039347 | 33  | 29  | 73  | 74 Lrpap1        | chr5 | 2922  | 35440228  | 0.86501  | 0.554 | 0.497 |
| NM_178610    | 21  | 13  | 34  | 33 Afap1         | chr5 | 6617  | 36345300  | 0.947901 | 0.552 | 0.507 |
| NM_010787    | 73  | 50  | 176 | 145 Mrfap1       | chr5 | 1579  | 37186134  | 0.947901 | 0.519 | 0.548 |
| NM_008449    | 17  | 22  | 24  | 11 Ppp2r2c       | chr5 | 4066  | 37318780  | 0.866345 | 0.584 | 0.686 |
| NM_008627    | 16  | 14  | 21  | 15 Stx18         | chr5 | 1562  | 38527588  | 0.947901 | 0.531 | 0.583 |
| NM_010306    | 60  | 50  | 130 | 135 Nsg1         | chr5 | 2140  | 38528777  | 0.347661 | 0.588 | 0.491 |
| NM_146145    | 86  | 51  | 32  | 13 A230054D04Rik | chr5 | 10646 | 42223668  | 0.86501  | 0.593 | 0.711 |
| NM_019657    | 27  | 32  | 67  | 54 Qdpr          | chr5 | 1326  | 45841346  | 0.750419 | 0.444 | 0.554 |
| NM_026490    | 21  | 15  | 31  | 19 Ugdh          | chr5 | 2461  | 65818760  | 0.947901 | 0.59  | 0.62  |
| NM_010687    | 29  | 23  | 21  | 10 Apbb2         | chr5 | 3362  | 66934804  | 0.947901 | 0.727 | 0.677 |
| NM_027352    | 27  | 44  | 428 | 560 Uchl1        | chr5 | 995   | 67078364  | 0.490713 | 0.485 | 0.433 |
| NM_153058    | 97  | 64  | 82  | 73 Limch1        | chr5 | 6142  | 67447645  | 0.947901 | 0.528 | 0.529 |
| NM_145958    | 14  | 11  | 30  | 14 Gabra4        | chr5 | 4123  | 72024918  | 0.86501  | 0.578 | 0.682 |
| NM_030145    | 96  | 110 | 29  | 11 Fryl          | chr5 | 11488 | 73411432  | 0.947901 | 0.686 | 0.725 |
| NM_175462    | 18  | 14  | 34  | 65 Ociad1        | chr5 | 1505  | 73704770  | 0.865502 | 0.42  | 0.343 |
| NM_019564    | 26  | 26  | 54  | 42 Ociad2        | chr5 | 2201  | 73727159  | 0.753949 | 0.458 | 0.563 |
| NM_001001980 | 56  | 50  | 20  | 17 Dcun1d4       | chr5 | 4063  | 73949359  | 0.947901 | 0.636 | 0.541 |
| NM_181796    | 59  | 64  | 48  | 28 Sgcb          | chr5 | 3727  | 74026509  | 0.633314 | 0.444 | 0.632 |
| NM_027168    | 60  | 31  | 53  | 19 Usp46         | chr5 | 3225  | 74412735  | 0.653115 | 0.56  | 0.736 |
| NM_016961    | 76  | 55  | 18  | 12 Kit           | chr5 | 5132  | 76049338  | 0.947901 | 0.54  | 0.6   |
| NM_138721    | 71  | 48  | 34  | 36 Exoc1         | chr5 | 3395  | 76997060  | 0.947901 | 0.519 | 0.486 |
| NM_026068    | 254 | 86  | 121 | 92 Paics         | chr5 | 2394  | 77396499  | 0.947901 | 0.585 | 0.568 |
| NM_026347    | 21  | 26  | 65  | 82 Rufy3         | chr5 | 4036  | 89070260  | 0.762186 | 0.518 | 0.442 |
| NM_026374    | 36  | 37  | 32  | 19 Slc4a4        | chr5 | 7492  | 89467557  | 0.80299  | 0.507 | 0.627 |
| NM_013886    | 18  | 9   | 16  | 24 Ankrd17       | chr5 | 10066 | 90719989  | 0.672243 | 0.578 | 0.4   |
| NM_001081049 | 30  | 22  | 34  | 29 Rchy1         | chr5 | 1967  | 92386624  | 0.947901 | 0.48  | 0.54  |
| NM_145527    | 32  | 28  | 14  | 19 G3bp2         | chr5 | 4276  | 92493477  | 0.947901 | 0.491 | 0.424 |
| NM_010513    | 19  | 18  | 124 | 198 Sep11        | chr5 | 5123  | 93600514  | 0.785646 | 0.434 | 0.385 |
| NM_010308    | 152 | 105 | 295 | 331 Ccni         | chr5 | 2348  | 93616823  | 0.355031 | 0.588 | 0.471 |
| NM_009157    | 22  | 17  | 117 | 83 Hnrpd         | chr5 | 6663  | 100387431 | 0.947901 | 0.553 | 0.585 |
| NM_008403    | 14  | 13  | 17  | 10 Enoph1        | chr5 | 1806  | 100496864 | 0.846101 | 0.485 | 0.63  |
| NM_025486    | 17  | 12  | 40  | 38 BC062109      | chr5 | 3100  | 100524700 | 0.753949 | 0.65  | 0.513 |
| NM_026896    | 19  | 18  | 255 | 338 Mrps18c      | chr5 | 526   | 101228579 | 0.947901 | 0.444 | 0.43  |
| NM_025280    | 16  | 15  | 48  | 72 Mapk10        | chr5 | 7203  | 103425720 | 0.895717 | 0.462 | 0.4   |
| NM_013551    | 13  | 13  | 46  | 30 Sparcl1       | chr5 | 2797  | 104542469 | 0.695676 | 0.492 | 0.605 |
| NM_026242    | 41  | 38  | 23  | 9 Spp1           | chr5 | 1410  | 104868369 | 0.947901 | 0.629 | 0.719 |
| NM_021099    | 34  | 29  | 10  | 29 Brdt          | chr5 | 4710  | 107815124 | 0.915297 | 0.346 | 0.256 |
| NM_001004164 | 16  | 10  | 25  | 14 Dgkq          | chr5 | 4612  | 109089569 | 0.465109 | 0.385 | 0.641 |
| NM_019694    | 50  | 26  | 34  | 22 Chfr          | chr5 | 3144  | 110599932 | 0.947901 | 0.674 | 0.607 |
| NM_175386    | 17  | 15  | 90  | 79 D5Erttd585e   | chr5 | 5241  | 110685457 | 0.947901 | 0.581 | 0.533 |

|              |     |     |     |     |               |      |       |           |          |       |       |
|--------------|-----|-----|-----|-----|---------------|------|-------|-----------|----------|-------|-------|
| NM_023403    | 94  | 83  | 40  | 21  | Pgam5         | chr5 | 2039  | 110698722 | 0.947901 | 0.645 | 0.656 |
| NM_008255    | 47  | 42  | 38  | 53  | Galnt9        | chr5 | 1237  | 111049823 | 0.697733 | 0.299 | 0.418 |
| NM_013535    | 104 | 95  | 44  | 35  | Pitpnb        | chr5 | 2761  | 111816839 | 0.562014 | 0.41  | 0.557 |
| NM_008410    | 160 | 127 | 131 | 84  | Mn1           | chr5 | 6128  | 111884244 | 0.8481   | 0.535 | 0.609 |
| NM_010688    | 20  | 14  | 206 | 197 | Asphd2        | chr5 | 1604  | 112814505 | 0.947901 | 0.493 | 0.511 |
| NM_029884    | 21  | 25  | 77  | 48  | Sez6l         | chr5 | 6073  | 112901830 | 0.677707 | 0.524 | 0.616 |
| NM_026240    | 15  | 25  | 15  | 11  | Kctd10        | chr5 | 3058  | 114820146 | 0.555395 | 0.342 | 0.577 |
| NM_010404    | 16  | 12  | 42  | 35  | Ube3b         | chr5 | 5191  | 114869516 | 0.647521 | 0.682 | 0.545 |
| NM_026759    | 68  | 54  | 24  | 23  | Triap1        | chr5 | 1049  | 115792889 | 0.947901 | 0.509 | 0.511 |
| NM_010358    | 66  | 49  | 17  | 27  | Prkab1        | chr5 | 2051  | 116474109 | 0.602323 | 0.583 | 0.386 |
| NM_172252    | 76  | 65  | 155 | 166 | Wsb2          | chr5 | 2438  | 117820820 | 0.947901 | 0.511 | 0.483 |
| NM_028007    | 20  | 15  | 68  | 33  | Fbxo21        | chr5 | 3909  | 118458056 | 0.833193 | 0.583 | 0.673 |
| NM_008379    | 45  | 50  | 50  | 39  | Rph3a         | chr5 | 4143  | 121459435 | 0.942332 | 0.627 | 0.562 |
| NM_026530    | 34  | 20  | 409 | 293 | Rpl6          | chr5 | 1219  | 121658575 | 0.947901 | 0.602 | 0.583 |
| NM_011828    | 18  | 24  | 25  | 23  | Aldh2         | chr5 | 2207  | 122030701 | 0.750419 | 0.667 | 0.521 |
| NM_029657    | 34  | 30  | 19  | 25  | Pptc7         | chr5 | 4611  | 122770923 | 0.947901 | 0.515 | 0.432 |
| NM_010316    | 290 | 184 | 196 | 246 | Vps29         | chr5 | 991   | 122813160 | 0.381503 | 0.527 | 0.443 |
| NM_010362    | 41  | 50  | 43  | 20  | Atp2a2        | chr5 | 4353  | 122939251 | 0.621704 | 0.522 | 0.683 |
| NM_021295    | 13  | 18  | 85  | 63  | Anapc5        | chr5 | 2760  | 123257333 | 0.947901 | 0.594 | 0.574 |
| NM_178797    | 15  | 14  | 42  | 26  | Rnf34         | chr5 | 1980  | 123318173 | 0.947901 | 0.622 | 0.618 |
| NM_029931    | 41  | 25  | 25  | 11  | Rhof          | chr5 | 2143  | 123568301 | 0.947901 | 0.656 | 0.694 |
| NM_001083897 | 23  | 14  | 25  | 20  | Sbno1         | chr5 | 10071 | 124860170 | 0.947901 | 0.633 | 0.556 |
| NM_172739    | 29  | 18  | 10  | 21  | Eif2b1        | chr5 | 1938  | 125028471 | 0.601949 | 0.5   | 0.323 |
| NM_026826    | 196 | 245 | 12  | 22  | Zfp664        | chr5 | 4139  | 125368177 | 0.947901 | 0.345 | 0.353 |
| NM_001048177 | 26  | 20  | 69  | 55  | Aacs          | chr5 | 3175  | 125996636 | 0.86501  | 0.632 | 0.556 |
| NM_026160    | 37  | 37  | 14  | 27  | Gbas          | chr5 | 2115  | 130263461 | 0.947901 | 0.425 | 0.341 |
| NM_010492    | 34  | 32  | 21  | 9   | Psph          | chr5 | 1482  | 130284924 | 0.770114 | 0.529 | 0.7   |
| NM_174998    | 25  | 19  | 570 | 485 | Cct6a         | chr5 | 2189  | 130321475 | 0.744899 | 0.583 | 0.54  |
| NM_029934    | 22  | 15  | 197 | 79  | Chchd2        | chr5 | 910   | 130363139 | 0.947901 | 0.741 | 0.714 |
| NM_013785    | 29  | 31  | 16  | 18  | 0610007L01Rik | chr5 | 3607  | 130718496 | 0.80299  | 0.31  | 0.471 |
| NM_172610    | 64  | 42  | 92  | 69  | Sbds          | chr5 | 1495  | 130724203 | 0.947901 | 0.547 | 0.571 |
| NM_207217    | 41  | 24  | 32  | 22  | Gtf2i         | chr5 | 4392  | 134771437 | 0.844976 | 0.493 | 0.593 |
| NM_025553    | 16  | 17  | 19  | 19  | Stx1a         | chr5 | 2071  | 135526106 | 0.947901 | 0.538 | 0.5   |
| NM_008617    | 171 | 203 | 82  | 101 | Mdh2          | chr5 | 1297  | 136266018 | 0.947901 | 0.457 | 0.448 |
| NM_029017    | 22  | 13  | 86  | 55  | Ywhag         | chr5 | 3510  | 136384468 | 0.947901 | 0.585 | 0.61  |
| NM_023290    | 19  | 12  | 110 | 130 | Rabl5         | chr5 | 911   | 137389080 | 0.947901 | 0.456 | 0.458 |
| NM_022417    | 35  | 18  | 48  | 54  | Fis1          | chr5 | 775   | 137442092 | 0.858549 | 0.404 | 0.471 |
| NM_008139    | 144 | 107 | 18  | 18  | Ars2          | chr5 | 3039  | 137737068 | 0.379948 | 0.299 | 0.5   |
| NM_010799    | 29  | 14  | 48  | 50  | Prkar1b       | chr5 | 2583  | 139584492 | 0.947901 | 0.554 | 0.49  |
| NM_178603    | 16  | 17  | 34  | 41  | Zfand2a       | chr5 | 3115  | 139960279 | 0.947901 | 0.5   | 0.453 |
| NM_177093    | 19  | 24  | 14  | 19  | Eif3s9        | chr5 | 2966  | 140916960 | 0.947901 | 0.373 | 0.424 |
| NM_023505    | 17  | 9   | 12  | 18  | Zfp12         | chr5 | 4271  | 144008567 | 0.27518  | 0.679 | 0.4   |
| NM_007516    | 78  | 63  | 279 | 203 | Rac1          | chr5 | 2284  | 144278049 | 0.72737  | 0.525 | 0.579 |
| NM_010298    | 19  | 15  | 56  | 58  | 2810453106Rik | chr5 | 2215  | 144323843 | 0.26307  | 0.671 | 0.491 |
| NM_008095    | 17  | 23  | 298 | 48  | Jtv1          | chr5 | 1072  | 144665522 | 0.248764 | 0.781 | 0.861 |
| NM_019650    | 50  | 32  | 78  | 36  | Lmtk2         | chr5 | 8114  | 144948158 | 0.525209 | 0.5   | 0.684 |
| NM_138593    | 24  | 12  | 39  | 38  | Arpc1a        | chr5 | 1588  | 145869289 | 0.947901 | 0.57  | 0.506 |
| NM_026472    | 55  | 44  | 18  | 22  | Ptcd1         | chr5 | 3014  | 145915988 | 0.947901 | 0.415 | 0.45  |
| NM_018741    | 56  | 37  | 266 | 321 | Atp5j2        | chr5 | 496   | 145952427 | 0.792244 | 0.486 | 0.453 |
| NM_013559    | 102 | 84  | 19  | 9   | Zkscan5       | chr5 | 3134  | 145982482 | 0.750419 | 0.51  | 0.679 |
| NM_008078    | 59  | 48  | 451 | 466 | Pomp          | chr5 | 734   | 148687248 | 0.191221 | 0.441 | 0.492 |
| NM_010629    | 124 | 92  | 14  | 13  | Uspl1         | chr5 | 3125  | 150024941 | 0.883593 | 0.667 | 0.519 |



|              |     |     |     |                  |      |      |           |          |       |       |
|--------------|-----|-----|-----|------------------|------|------|-----------|----------|-------|-------|
| NM_009582    | 13  | 15  | 98  | 76 Hsp110        | chr5 | 3478 | 150431890 | 0.947901 | 0.548 | 0.563 |
| NM_201354    | 9   | 27  | 24  | 10 Rfc3          | chr5 | 1215 | 152453734 | 0.296511 | 0.429 | 0.706 |
| NM_027350    | 117 | 99  | 55  | 36 Col1a2        | chr6 | 5143 | 4490674   | 0.525209 | 0.435 | 0.604 |
| NM_024174    | 26  | 24  | 39  | 13 Casd1         | chr6 | 3760 | 4592497   | 0.150651 | 0.463 | 0.75  |
| NM_024193    | 19  | 14  | 130 | 134 Dync1i1      | chr6 | 2579 | 5977485   | 0.844976 | 0.446 | 0.492 |
| NM_001081079 | 33  | 33  | 85  | 100 Shfm1        | chr6 | 491  | 6508473   | 0.945732 | 0.511 | 0.459 |
| NM_028132    | 114 | 73  | 30  | 44 Tac1          | chr6 | 1034 | 7512646   | 0.947901 | 0.42  | 0.405 |
| NM_033582    | 21  | 18  | 27  | 28 Ica1          | chr6 | 2090 | 8704622   | 0.947901 | 0.515 | 0.491 |
| NM_013625    | 43  | 46  | 46  | 36 B630005N14Rik | chr6 | 4147 | 13576079  | 0.947901 | 0.621 | 0.561 |
| NM_024197    | 52  | 53  | 161 | 233 Capza2       | chr6 | 2015 | 17615540  | 0.573288 | 0.519 | 0.409 |
| NM_033585    | 21  | 18  | 105 | 61 Ctnnbp2       | chr6 | 5931 | 18383862  | 0.947901 | 0.651 | 0.633 |
| NM_033590    | 19  | 18  | 104 | 100 D6Wsu176e    | chr6 | 2739 | 22293280  | 0.947901 | 0.497 | 0.51  |
| NM_023526    | 48  | 31  | 14  | 22 Ptpnz1        | chr6 | 8068 | 23001998  | 0.805861 | 0.535 | 0.389 |
| NM_019746    | 53  | 46  | 464 | 461 Ndufa5       | chr6 | 549  | 24477279  | 0.947901 | 0.511 | 0.502 |
| NM_028273    | 40  | 22  | 11  | 27 Snd1          | chr6 | 3482 | 28657064  | 0.947901 | 0.378 | 0.289 |
| NM_011035    | 39  | 51  | 76  | 74 Calu          | chr6 | 3216 | 29324688  | 0.947901 | 0.477 | 0.507 |
| NM_026614    | 90  | 86  | 137 | 119 Atp6v1f      | chr6 | 635  | 29420070  | 0.58647  | 0.434 | 0.535 |
| NM_013880    | 24  | 14  | 28  | 13 Zc3hc1        | chr6 | 1847 | 30337477  | 0.947901 | 0.719 | 0.683 |
| NM_145131    | 19  | 20  | 19  | 6 Tsga14         | chr6 | 3393 | 30610911  | 0.947901 | 0.707 | 0.76  |
| NM_023409    | 50  | 32  | 31  | 25 Chchd3        | chr6 | 1432 | 32742393  | 0.858672 | 0.433 | 0.554 |
| NM_001033174 | 14  | 17  | 26  | 6 Akr1b3         | chr6 | 1402 | 34267418  | 0.947901 | 0.813 | 0.813 |
| NM_010885    | 86  | 91  | 33  | 20 Slc13a4       | chr6 | 3422 | 35257495  | 0.573356 | 0.821 | 0.623 |
| NM_175933    | 29  | 14  | 65  | 50 Ptn           | chr6 | 2021 | 36693436  | 0.947901 | 0.529 | 0.565 |
| NM_001077495 | 39  | 60  | 34  | 29 Trim24        | chr6 | 4053 | 37916057  | 0.947901 | 0.607 | 0.54  |
| NM_009787    | 11  | 15  | 14  | 20 Pdia4         | chr6 | 2610 | 47756610  | 0.947901 | 0.423 | 0.412 |
| NM_008633    | 52  | 41  | 27  | 20 Krba1         | chr6 | 3986 | 48365778  | 0.261888 | 0.269 | 0.574 |
| NM_172416    | 29  | 19  | 397 | 315 Atp6v0e2     | chr6 | 1786 | 48490048  | 0.947901 | 0.56  | 0.558 |
| NM_007531    | 23  | 20  | 45  | 28 Tmem176b      | chr6 | 1659 | 48790389  | 0.947901 | 0.633 | 0.616 |
| NM_026737    | 129 | 152 | 54  | 15 Tra2a         | chr6 | 1839 | 49213932  | 0.947901 | 0.774 | 0.783 |
| NM_016744    | 16  | 10  | 194 | 126 Npy          | chr6 | 561  | 49777509  | 0.947901 | 0.6   | 0.606 |
| NM_028388    | 99  | 95  | 14  | 21 Dfna5h        | chr6 | 2133 | 50211741  | 0.712972 | 0.6   | 0.4   |
| NM_138671    | 41  | 46  | 14  | 14 Cbx3          | chr6 | 1851 | 51432521  | 0.431606 | 0.214 | 0.5   |
| NM_134094    | 149 | 147 | 155 | 112 Tax1bp1      | chr6 | 2970 | 52716072  | 0.562014 | 0.671 | 0.581 |
| NM_013602    | 35  | 14  | 55  | 76 Gars          | chr6 | 2390 | 55029252  | 0.23556  | 0.592 | 0.42  |
| NM_011958    | 23  | 11  | 66  | 55 Adcyap1r1     | chr6 | 6176 | 55447272  | 0.947901 | 0.538 | 0.545 |
| NM_153057    | 43  | 36  | 19  | 22 Neurod6       | chr6 | 2154 | 55628507  | 0.844976 | 0.583 | 0.463 |
| NM_027654    | 35  | 30  | 25  | 15 Kbtbd2        | chr6 | 2799 | 56729004  | 0.947901 | 0.56  | 0.625 |
| NM_019840    | 22  | 16  | 44  | 12 Nt5c3         | chr6 | 1568 | 56838393  | 0.947901 | 0.731 | 0.786 |
| NM_011119    | 13  | 13  | 18  | 25 AW146242      | chr6 | 2906 | 57724731  | 0.947901 | 0.48  | 0.419 |
| NM_020610    | 17  | 18  | 20  | 33 Gng12         | chr6 | 4133 | 66970959  | 0.895717 | 0.484 | 0.377 |
| NM_019837    | 53  | 50  | 17  | 14 Rnf181        | chr6 | 1397 | 72309941  | 0.943216 | 0.649 | 0.548 |
| NM_023858    | 15  | 17  | 109 | 36 Tgoln1        | chr6 | 5025 | 72565521  | 0.277199 | 0.569 | 0.752 |
| NM_008741    | 189 | 148 | 36  | 21 Suclg1        | chr6 | 1211 | 73225371  | 0.908076 | 0.549 | 0.632 |
| NM_173757    | 11  | 17  | 50  | 61 Ctnna2        | chr6 | 4046 | 77555214  | 0.176665 | 0.667 | 0.45  |
| NM_008792    | 54  | 34  | 31  | 24 Mrpl19        | chr6 | 5016 | 81915748  | 0.947901 | 0.583 | 0.564 |
| NM_008740    | 17  | 9   | 107 | 107 Pole4        | chr6 | 1694 | 82597767  | 0.896765 | 0.571 | 0.5   |
| NM_015781    | 35  | 19  | 35  | 12 Sema4f        | chr6 | 4067 | 82867468  | 0.459791 | 0.516 | 0.745 |
| NM_008691    | 50  | 62  | 51  | 28 Paip2b        | chr6 | 3323 | 83757513  | 0.750419 | 0.5   | 0.646 |
| NM_010945    | 29  | 21  | 15  | 18 Zfml          | chr6 | 6344 | 83933978  | 0.910787 | 0.356 | 0.455 |
| NM_008825    | 24  | 18  | 32  | 19 Sfxn5         | chr6 | 3646 | 85217872  | 0.947901 | 0.667 | 0.627 |
| NM_017373    | 15  | 12  | 56  | 40 Cct7          | chr6 | 1879 | 85417099  | 0.780086 | 0.484 | 0.583 |
| NM_144898    | 18  | 10  | 132 | 59 Snrpg         | chr6 | 393  | 86328850  | 0.202927 | 0.476 | 0.691 |

|              |     |     |     |     |               |      |       |           |          |       |       |
|--------------|-----|-----|-----|-----|---------------|------|-------|-----------|----------|-------|-------|
| NM_001005748 | 18  | 12  | 42  | 35  | Tia1          | chr6 | 4418  | 86380250  | 0.947901 | 0.561 | 0.545 |
| NM_010914    | 349 | 366 | 87  | 63  | 2610209M04Rik | chr6 | 836   | 86625376  | 0.783653 | 0.467 | 0.58  |
| NM_177906    | 28  | 5   | 111 | 98  | Aak1          | chr6 | 19363 | 86953034  | 0.947901 | 0.52  | 0.531 |
| NM_053134    | 9   | 19  | 39  | 29  | Copg          | chr6 | 4014  | 87862991  | 0.947901 | 0.532 | 0.574 |
| NM_008173    | 56  | 38  | 36  | 23  | C130022K22Rik | chr6 | 1757  | 91849412  | 0.86501  | 0.719 | 0.61  |
| NM_016978    | 20  | 19  | 89  | 108 | Mrps25        | chr6 | 6076  | 92128732  | 0.945732 | 0.506 | 0.452 |
| NM_133800    | 74  | 49  | 26  | 36  | Magi1         | chr6 | 4969  | 93765782  | 0.828443 | 0.538 | 0.419 |
| NM_025987    | 15  | 10  | 11  | 30  | Arl6ip5       | chr6 | 1339  | 97182586  | 0.602323 | 0.455 | 0.268 |
| NM_133666    | 110 | 110 | 51  | 44  | Trnt1         | chr6 | 2207  | 106729385 | 0.712511 | 0.4   | 0.537 |
| NM_033595    | 20  | 20  | 27  | 31  | Crbn          | chr6 | 4051  | 106744229 | 0.947901 | 0.424 | 0.466 |
| NM_033591    | 19  | 18  | 7   | 39  | Edem1         | chr6 | 5858  | 108805532 | 0.947901 | 0.1   | 0.152 |
| NM_144870    | 214 | 187 | 86  | 86  | Lhfp14        | chr6 | 4782  | 113121481 | 0.604997 | 0.596 | 0.5   |
| NM_033583    | 19  | 18  | 21  | 27  | Jagn1         | chr6 | 1133  | 113397498 | 0.947901 | 0.5   | 0.438 |
| NM_028806    | 42  | 32  | 39  | 33  | Tmem111       | chr6 | 1958  | 113481496 | 0.947901 | 0.511 | 0.542 |
| NM_026004    | 19  | 7   | 25  | 27  | Sec13         | chr6 | 1301  | 113686422 | 0.915297 | 0.563 | 0.481 |
| NM_145525    | 18  | 16  | 19  | 17  | Atp2b2        | chr6 | 7060  | 113767208 | 0.947901 | 0.448 | 0.528 |
| NM_019703    | 130 | 104 | 15  | 17  | Slc6a1        | chr6 | 4153  | 114265796 | 0.947901 | 0.526 | 0.469 |
| NM_178708    | 19  | 15  | 30  | 20  | Mkrn2         | chr6 | 2241  | 115563383 | 0.947901 | 0.613 | 0.6   |
| NM_019632    | 39  | 54  | 20  | 38  | Adipor2       | chr6 | 3963  | 119307261 | 0.487509 | 0.559 | 0.345 |
| NM_033575    | 19  | 18  | 21  | 16  | Erc1          | chr6 | 8760  | 119774530 | 0.947901 | 0.556 | 0.568 |
| NM_028017    | 18  | 21  | 112 | 126 | Atp6v1e1      | chr6 | 1219  | 120772627 | 0.508205 | 0.548 | 0.471 |
| NM_026703    | 78  | 68  | 17  | 14  | Slc6a13       | chr6 | 2150  | 121287335 | 0.602323 | 0.739 | 0.548 |
| NM_016743    | 82  | 98  | 22  | 19  | Iqsec3        | chr6 | 6840  | 121363302 | 0.770622 | 0.375 | 0.537 |
| NM_011069    | 15  | 14  | 18  | 15  | Phc1          | chr6 | 3683  | 122284163 | 0.947901 | 0.481 | 0.545 |
| NM_020271    | 51  | 24  | 56  | 30  | Pex5          | chr6 | 3074  | 124346904 | 0.947901 | 0.674 | 0.651 |
| NM_021524    | 41  | 18  | 56  | 73  | Clstn3        | chr6 | 3937  | 124400730 | 0.947901 | 0.455 | 0.434 |
| NM_026441    | 17  | 16  | 54  | 35  | Phb2          | chr6 | 1360  | 124664940 | 0.947901 | 0.535 | 0.607 |
| NM_033581    | 21  | 18  | 82  | 63  | Grcc10        | chr6 | 568   | 124690607 | 0.947901 | 0.523 | 0.566 |
| NM_033592    | 19  | 18  | 29  | 18  | Eno2          | chr6 | 2656  | 124718323 | 0.947901 | 0.645 | 0.617 |
| NM_001042623 | 50  | 54  | 292 | 252 | Tpi1          | chr6 | 1594  | 124764401 | 0.947901 | 0.543 | 0.537 |
| NM_020569    | 51  | 75  | 73  | 18  | Ccnd2         | chr6 | 5772  | 127096144 | 0.947901 | 0.804 | 0.802 |
| NM_033577    | 13  | 14  | 48  | 38  | Gabarapl1     | chr6 | 1773  | 129491515 | 0.947901 | 0.552 | 0.558 |
| NM_023456    | 39  | 26  | 34  | 58  | Ptpro         | chr6 | 5075  | 137410282 | 0.859246 | 0.431 | 0.37  |
| NM_025939    | 38  | 27  | 10  | 15  | BC027061      | chr6 | 2155  | 142310369 | 0.947901 | 0.485 | 0.4   |
| NM_028024    | 14  | 15  | 290 | 220 | Ldhb          | chr6 | 1324  | 142456412 | 0.806139 | 0.608 | 0.569 |
| NM_010864    | 36  | 22  | 12  | 22  | Cmas          | chr6 | 1687  | 142723698 | 0.324299 | 0.573 | 0.353 |
| NM_011482    | 31  | 33  | 53  | 0   | Tuba3b        | chr6 | 1573  | 145569637 | 0.783653 | 0.962 | 1     |
| NM_008786    | 30  | 16  | 19  | 19  | Mlst1         | chr6 | 3397  | 148129750 | 0.947901 | 0.517 | 0.5   |
| NM_009122    | 32  | 16  | 65  | 58  | Leng4         | chr7 | 2880  | 3644365   | 0.947901 | 0.595 | 0.528 |
| NM_017400    | 20  | 17  | 32  | 31  | Ttyh1         | chr7 | 3888  | 4086866   | 0.947901 | 0.48  | 0.508 |
| NM_026073    | 57  | 68  | 45  | 44  | Syt5          | chr7 | 1764  | 4497845   | 0.805861 | 0.636 | 0.506 |
| NM_011201    | 16  | 13  | 38  | 37  | Rps5          | chr7 | 763   | 13507687  | 0.786421 | 0.426 | 0.507 |
| NM_010817    | 78  | 61  | 22  | 16  | Napa          | chr7 | 2332  | 16702582  | 0.780086 | 0.436 | 0.579 |
| NM_025436    | 23  | 33  | 20  | 16  | Mrg2          | chr7 | 1781  | 16771572  | 0.947901 | 0.533 | 0.556 |
| NM_011875    | 34  | 33  | 43  | 53  | Sae1          | chr7 | 1871  | 16952223  | 0.763276 | 0.532 | 0.448 |
| NM_009093    | 193 | 178 | 25  | 17  | Grif1         | chr7 | 8393  | 17146972  | 0.947901 | 0.617 | 0.595 |
| NM_011290    | 533 | 352 | 284 | 118 | Calm3         | chr7 | 2233  | 17505000  | 0.947901 | 0.728 | 0.706 |
| NM_011184    | 607 | 703 | 13  | 12  | Rtn2          | chr7 | 1947  | 19881163  | 0.696682 | 0.719 | 0.52  |
| NM_172707    | 22  | 20  | 36  | 26  | Gemin7        | chr7 | 763   | 20150344  | 0.490713 | 0.423 | 0.581 |
| NM_011874    | 35  | 29  | 489 | 309 | Apoe          | chr7 | 1266  | 20281675  | 0.727568 | 0.517 | 0.613 |
| NM_022980    | 64  | 43  | 40  | 36  | Atp1a3        | chr7 | 4043  | 25785763  | 0.888353 | 0.602 | 0.526 |
| NM_024499    | 27  | 29  | 69  | 49  | Tmem91        | chr7 | 874   | 26460101  | 0.947901 | 0.589 | 0.585 |

|              |     |      |     |                  |      |       |          |          |       |       |
|--------------|-----|------|-----|------------------|------|-------|----------|----------|-------|-------|
| NM_026557    | 24  | 26   | 59  | 51 Pld3          | chr7 | 2246  | 28330255 | 0.907627 | 0.593 | 0.536 |
| NM_001039089 | 49  | 33   | 14  | 16 Psmc4         | chr7 | 1436  | 28833969 | 0.947901 | 0.547 | 0.467 |
| NM_001081086 | 20  | 32   | 19  | 10 Sirt2         | chr7 | 1863  | 29573170 | 0.445503 | 0.395 | 0.655 |
| NM_011300    | 903 | 1333 | 34  | 65 Hnrpl         | chr7 | 2097  | 29605738 | 0.947901 | 0.341 | 0.343 |
| NM_009091    | 65  | 48   | 44  | 39 Ech1          | chr7 | 1138  | 29615050 | 0.947901 | 0.577 | 0.53  |
| NM_177242    | 17  | 16   | 48  | 84 Eif3s12       | chr7 | 773   | 29765513 | 0.562731 | 0.5   | 0.364 |
| NM_133692    | 22  | 22   | 18  | 29 Psmc8         | chr7 | 1529  | 29965339 | 0.329905 | 0.667 | 0.383 |
| NM_080853    | 32  | 18   | 74  | 90 Zfp260        | chr7 | 3851  | 30892620 | 0.947901 | 0.475 | 0.451 |
| NM_018853    | 160 | 409  | 40  | 38 Capns1        | chr7 | 1461  | 30977190 | 0.947901 | 0.459 | 0.513 |
| NM_019570    | 16  | 11   | 105 | 76 Clip3         | chr7 | 3300  | 31092940 | 0.915297 | 0.528 | 0.58  |
| NM_148930    | 32  | 14   | 391 | 263 Aplp1        | chr7 | 2389  | 31220142 | 0.866345 | 0.557 | 0.598 |
| NM_009009    | 55  | 43   | 19  | 32 Snx26         | chr7 | 4415  | 31317857 | 0.820336 | 0.5   | 0.373 |
| NM_021305    | 21  | 16   | 61  | 46 Psenen        | chr7 | 670   | 31347416 | 0.947901 | 0.6   | 0.57  |
| NM_026434    | 19  | 23   | 31  | 23 U2af114       | chr7 | 864   | 31349764 | 0.863684 | 0.477 | 0.574 |
| NM_001081247 | 13  | 16   | 104 | 47 Wbp7          | chr7 | 8457  | 31361794 | 0.347816 | 0.529 | 0.689 |
| NM_025587    | 32  | 28   | 22  | 65 Gramd1a       | chr7 | 2681  | 31927435 | 0.947901 | 0.277 | 0.253 |
| NM_020012    | 99  | 77   | 156 | 139 Gpi1         | chr7 | 1982  | 35015179 | 0.92262  | 0.566 | 0.529 |
| NM_027541    | 15  | 13   | 13  | 18 Pepd          | chr7 | 1876  | 35706457 | 0.636108 | 0.633 | 0.419 |
| NM_023281    | 132 | 95   | 291 | 260 Pdc5         | chr7 | 642   | 36431168 | 0.947901 | 0.535 | 0.528 |
| NM_133704    | 12  | 13   | 32  | 97 Pop4          | chr7 | 1214  | 39051169 | 0.947901 | 0.245 | 0.248 |
| NM_026147    | 76  | 17   | 31  | 25 Etfb          | chr7 | 835   | 50707734 | 0.947901 | 0.505 | 0.554 |
| NM_009255    | 136 | 101  | 362 | 635 Rps11        | chr7 | 611   | 52379722 | 0.947901 | 0.359 | 0.363 |
| NM_145516    | 68  | 40   | 197 | 272 Rpl13a       | chr7 | 803   | 52381174 | 0.067764 | 0.526 | 0.42  |
| NM_023537    | 37  | 28   | 19  | 44 Pih1d1        | chr7 | 1101  | 52413067 | 0.805861 | 0.414 | 0.302 |
| NM_007453    | 23  | 30   | 219 | 94 Ftl1          | chr7 | 986   | 52713627 | 0.602323 | 0.758 | 0.7   |
| NM_009001    | 49  | 43   | 20  | 20 Emp3          | chr7 | 695   | 53174806 | 0.805861 | 0.636 | 0.5   |
| NM_019708    | 46  | 62   | 24  | 18 Nomo1         | chr7 | 4129  | 53338625 | 0.947901 | 0.544 | 0.571 |
| NM_029971    | 27  | 32   | 20  | 115 Ldha         | chr7 | 1681  | 54110529 | 0.289667 | 0.261 | 0.148 |
| NM_008947    | 37  | 28   | 18  | 20 Tsg101        | chr7 | 1832  | 54144575 | 0.724675 | 0.636 | 0.474 |
| NM_008910    | 25  | 27   | 14  | 29 Prmt3         | chr7 | 2495  | 57112745 | 0.459791 | 0.577 | 0.326 |
| NM_178639    | 30  | 15   | 137 | 74 Slc17a6       | chr7 | 4078  | 58877526 | 0.947901 | 0.64  | 0.649 |
| NM_016891    | 37  | 31   | 63  | 38 Luzp2         | chr7 | 5274  | 62090617 | 0.540466 | 0.452 | 0.624 |
| NM_133485    | 38  | 29   | 43  | 24 Herc2         | chr7 | 15363 | 63484678 | 0.523991 | 0.455 | 0.642 |
| NM_029763    | 11  | 15   | 38  | 21 Gabra5        | chr7 | 2674  | 64744509 | 0.385288 | 0.385 | 0.644 |
| NM_145417    | 12  | 14   | 25  | 16 Apba2         | chr7 | 3334  | 71898333 | 0.947901 | 0.643 | 0.61  |
| NM_175498    | 18  | 20   | 215 | 145 Tm2d3        | chr7 | 1611  | 72846488 | 0.301202 | 0.5   | 0.597 |
| NM_181650    | 13  | 22   | 11  | 22 Snrpa1        | chr7 | 1113  | 73219405 | 0.575419 | 0.53  | 0.333 |
| NM_025517    | 42  | 37   | 16  | 14 Igf1r         | chr7 | 11978 | 75372391 | 0.947901 | 0.514 | 0.533 |
| NM_008923    | 36  | 29   | 23  | 7 Slco3a1        | chr7 | 4697  | 81463360 | 0.602323 | 0.559 | 0.767 |
| NM_011886    | 45  | 32   | 83  | 74 Mrpl46        | chr7 | 1173  | 85927726 | 0.947901 | 0.551 | 0.529 |
| NM_017374    | 76  | 94   | 44  | 11 Mrps11        | chr7 | 880   | 85937632 | 0.525209 | 0.659 | 0.8   |
| NM_025498    | 33  | 22   | 77  | 90 Hddc3         | chr7 | 860   | 87490595 | 0.648107 | 0.555 | 0.461 |
| NM_026440    | 14  | 14   | 131 | 118 Ap3b2        | chr7 | 3816  | 88621975 | 0.947901 | 0.557 | 0.526 |
| NM_030564    | 28  | 17   | 19  | 17 2610204K14Rik | chr7 | 1423  | 88912439 | 0.947901 | 0.545 | 0.528 |
| NM_025390    | 26  | 80   | 59  | 42 Btbd1         | chr7 | 3020  | 88941903 | 0.416102 | 0.429 | 0.584 |
| NM_012052    | 421 | 296  | 40  | 27 Hdgfrp3       | chr7 | 5868  | 89029429 | 0.947901 | 0.667 | 0.597 |
| NM_027324    | 148 | 126  | 24  | 20 Sh3gl3        | chr7 | 1597  | 89455314 | 0.947901 | 0.541 | 0.545 |
| NM_023248    | 81  | 67   | 104 | 94 Mesdc2        | chr7 | 4235  | 91049795 | 0.947901 | 0.531 | 0.525 |
| NM_178607    | 20  | 20   | 43  | 41 2210412D01Rik | chr7 | 2252  | 91262790 | 0.945732 | 0.577 | 0.512 |
| NM_153781    | 16  | 29   | 225 | 309 Arnt2        | chr7 | 6006  | 91510066 | 0.803541 | 0.378 | 0.421 |
| NM_011871    | 11  | 16   | 54  | 25 Tmem135       | chr7 | 3502  | 96487105 | 0.617974 | 0.525 | 0.684 |
| NM_013725    | 587 | 1050 | 43  | 33 Dlg2          | chr7 | 7252  | 99435068 | 0.947901 | 0.512 | 0.566 |



|              |     |     |     |                  |      |      |           |          |       |       |
|--------------|-----|-----|-----|------------------|------|------|-----------|----------|-------|-------|
| NM_016784    | 14  | 11  | 16  | 33 Ccdc90b       | chr7 | 1212 | 99730521  | 0.134726 | 0.647 | 0.327 |
| NM_013872    | 56  | 34  | 406 | 324 Ndufc2       | chr7 | 613  | 104548782 | 0.301202 | 0.484 | 0.556 |
| NM_175092    | 21  | 11  | 17  | 9 1810020D17Rik  | chr7 | 866  | 104706668 | 0.918799 | 0.541 | 0.654 |
| NM_009143    | 181 | 141 | 58  | 64 Pak1          | chr7 | 3081 | 105059698 | 0.947901 | 0.433 | 0.475 |
| NM_152824    | 72  | 59  | 27  | 19 Mtap6         | chr7 | 4962 | 106464322 | 0.85781  | 0.486 | 0.587 |
| NM_013663    | 17  | 11  | 403 | 295 Rps3         | chr7 | 1879 | 106627955 | 0.947901 | 0.587 | 0.577 |
| NM_025321    | 87  | 104 | 11  | 16 Pold3         | chr7 | 3002 | 107270002 | 0.947901 | 0.5   | 0.407 |
| NM_016858    | 42  | 29  | 17  | 8 Chchd8         | chr7 | 834  | 107687631 | 0.805861 | 0.523 | 0.68  |
| NM_011563    | 423 | 462 | 94  | 39 Mrpl48        | chr7 | 968  | 107731629 | 0.601754 | 0.582 | 0.707 |
| NM_175400    | 22  | 10  | 141 | 198 Rab6         | chr7 | 3403 | 107787922 | 0.947901 | 0.413 | 0.416 |
| NM_008882    | 26  | 0   | 109 | 61 B930006L02Rik | chr7 | 6610 | 107987989 | 0.199736 | 0.51  | 0.641 |
| NM_182999    | 31  | 18  | 30  | 21 2400001E08Rik | chr7 | 1075 | 109060159 | 0.940278 | 0.5   | 0.588 |
| NM_175549    | 19  | 10  | 66  | 33 Apbb1         | chr7 | 2593 | 112707142 | 0.947901 | 0.615 | 0.667 |
| NM_009048    | 16  | 11  | 138 | 161 Eif3s5       | chr7 | 1252 | 116085082 | 0.909636 | 0.552 | 0.462 |
| NM_028230    | 18  | 16  | 61  | 47 Tub           | chr7 | 5941 | 116173864 | 0.947901 | 0.576 | 0.565 |
| NM_009155    | 80  | 71  | 50  | 31 Rpl27a        | chr7 | 1112 | 116665590 | 0.947901 | 0.652 | 0.617 |
| NM_019535    | 22  | 17  | 42  | 39 Tmem9b        | chr7 | 1685 | 116879591 | 0.947901 | 0.444 | 0.519 |
| NM_016807    | 29  | 17  | 31  | 37 Nrip3         | chr7 | 3913 | 116924916 | 0.947901 | 0.486 | 0.456 |
| NM_133231    | 17  | 8   | 190 | 162 Eif4g2       | chr7 | 7760 | 118213890 | 0.915297 | 0.5   | 0.54  |
| NM_011975    | 30  | 16  | 40  | 33 Btbd10        | chr7 | 2563 | 120459487 | 0.947901 | 0.588 | 0.548 |
| NM_025901    | 22  | 11  | 75  | 86 Copb1         | chr7 | 3315 | 121384190 | 0.405087 | 0.27  | 0.466 |
| NM_026799    | 28  | 28  | 64  | 117 Psm1         | chr7 | 1255 | 121413296 | 0.918799 | 0.405 | 0.354 |
| NM_011967    | 105 | 92  | 137 | 111 Rps13        | chr7 | 521  | 123475904 | 0.698463 | 0.643 | 0.552 |
| NM_133735    | 39  | 55  | 282 | 170 Rps15a       | chr7 | 5158 | 125258362 | 0.780086 | 0.547 | 0.624 |
| NM_026308    | 55  | 25  | 103 | 81 Coq7          | chr7 | 871  | 125676771 | 0.947901 | 0.514 | 0.56  |
| NM_008997    | 20  | 28  | 24  | 7 9030624J02Rik  | chr7 | 3101 | 125981673 | 0.805861 | 0.648 | 0.774 |
| NM_007452    | 29  | 31  | 47  | 60 Crym          | chr7 | 1256 | 127333284 | 0.602323 | 0.576 | 0.439 |
| NM_133648    | 21  | 10  | 174 | 128 Uqcrc2       | chr7 | 1882 | 127802664 | 0.947901 | 0.603 | 0.576 |
| NM_001081203 | 19  | 11  | 47  | 49 Mettl9        | chr7 | 1850 | 128219741 | 0.947901 | 0.432 | 0.49  |
| NM_008014    | 49  | 61  | 80  | 49 Dctn5         | chr7 | 1517 | 129292531 | 0.474379 | 0.51  | 0.62  |
| NM_207209    | 44  | 24  | 26  | 22 Prkcb1        | chr7 | 8830 | 129711710 | 0.947901 | 0.492 | 0.542 |
| NM_145452    | 22  | 16  | 52  | 40 Lcmt1         | chr7 | 1369 | 130571668 | 0.842379 | 0.484 | 0.565 |
| NM_019658    | 17  | 17  | 92  | 78 Tufm          | chr7 | 1609 | 133634070 | 0.947901 | 0.517 | 0.541 |
| NM_008983    | 17  | 12  | 22  | 14 Tbc1d10b      | chr7 | 3614 | 134342926 | 0.792244 | 0.448 | 0.611 |
| NM_008857    | 16  | 16  | 15  | 18 Vkorc1        | chr7 | 764  | 135038937 | 0.603149 | 0.629 | 0.455 |
| NM_008855    | 30  | 31  | 135 | 153 Tgfb1i1      | chr7 | 3058 | 135395602 | 0.602323 | 0.366 | 0.469 |
| NM_011254    | 32  | 31  | 57  | 41 Brwd2         | chr7 | 4519 | 136774267 | 0.883593 | 0.514 | 0.582 |
| NM_009079    | 14  | 13  | 51  | 30 Ate1          | chr7 | 4727 | 137662877 | 0.947901 | 0.581 | 0.63  |
| NM_008950    | 41  | 21  | 38  | 16 Plekha1       | chr7 | 3321 | 138056322 | 0.744899 | 0.538 | 0.704 |
| NM_017475    | 54  | 34  | 34  | 28 Htra1         | chr7 | 2002 | 138128698 | 0.947901 | 0.5   | 0.548 |
| NM_008945    | 20  | 23  | 24  | 14 Acadsb        | chr7 | 3243 | 138568088 | 0.70756  | 0.462 | 0.632 |
| NM_175445    | 28  | 23  | 44  | 29 Bub3          | chr7 | 2055 | 138714444 | 0.851937 | 0.483 | 0.603 |
| NM_025441    | 20  | 21  | 23  | 16 Oat           | chr7 | 2155 | 139768020 | 0.947901 | 0.513 | 0.59  |
| NM_024287    | 43  | 61  | 16  | 21 Ppp2r2d       | chr7 | 2079 | 146074288 | 0.805861 | 0.552 | 0.432 |
| NM_026517    | 49  | 32  | 31  | 27 Bet1l         | chr7 | 1406 | 148039435 | 0.947901 | 0.553 | 0.534 |
| NM_029457    | 11  | 14  | 54  | 44 Psm13         | chr7 | 1563 | 148084270 | 0.947901 | 0.507 | 0.551 |
| NM_173347    | 17  | 18  | 34  | 40 Ifitm3        | chr7 | 648  | 148195636 | 0.636367 | 0.603 | 0.459 |
| NM_146081    | 14  | 11  | 37  | 19 Cend1         | chr7 | 1659 | 148612464 | 0.561144 | 0.479 | 0.661 |
| NM_021526    | 115 | 104 | 20  | 27 Igf2          | chr7 | 4038 | 149836672 | 0.780086 | 0.547 | 0.426 |
| NM_008973    | 63  | 56  | 48  | 55 Ctnn          | chr7 | 3029 | 151651884 | 0.780711 | 0.556 | 0.466 |
| NM_008540    | 15  | 17  | 26  | 21 Lass4         | chr8 | 3668 | 4525484   | 0.601486 | 0.75  | 0.553 |
| NM_009295    | 121 | 113 | 22  | 27 Abhd13        | chr8 | 5074 | 9991418   | 0.947901 | 0.5   | 0.449 |

|              |     |     |     |                  |      |      |          |          |       |       |
|--------------|-----|-----|-----|------------------|------|------|----------|----------|-------|-------|
| NM_009333    | 103 | 73  | 53  | 36 Col4a1        | chr8 | 6636 | 11312669 | 0.947901 | 0.557 | 0.596 |
| NM_024270    | 19  | 36  | 11  | 19 Col4a2        | chr8 | 6184 | 11448675 | 0.929497 | 0.464 | 0.367 |
| NM_177102    | 43  | 30  | 14  | 12 Pcid2         | chr8 | 2408 | 13100382 | 0.947901 | 0.559 | 0.538 |
| NM_018861    | 42  | 27  | 110 | 34 Lamp1         | chr8 | 2265 | 13173664 | 0.141878 | 0.617 | 0.764 |
| NM_026211    | 77  | 78  | 18  | 18 Fbxo25        | chr8 | 2008 | 13939801 | 0.947901 | 0.533 | 0.5   |
| NM_019776    | 14  | 23  | 12  | 18 Agpat5        | chr8 | 3829 | 18884057 | 0.750419 | 0.581 | 0.4   |
| NM_146032    | 19  | 10  | 67  | 47 Vdac3         | chr8 | 1345 | 23699244 | 0.830253 | 0.513 | 0.588 |
| NM_028052    | 19  | 15  | 50  | 55 Ap3m2         | chr8 | 3401 | 23914250 | 0.947901 | 0.53  | 0.476 |
| NM_029682    | 33  | 24  | 36  | 37 Agpat6        | chr8 | 3838 | 24301362 | 0.901101 | 0.422 | 0.493 |
| NM_011506    | 38  | 31  | 47  | 37 Adam9         | chr8 | 4003 | 26116729 | 0.947901 | 0.532 | 0.56  |
| NM_030706    | 21  | 18  | 31  | 12 Tacc1         | chr8 | 7695 | 26292620 | 0.947901 | 0.639 | 0.721 |
| NM_023056    | 31  | 18  | 30  | 26 Hgsnat        | chr8 | 2679 | 27078839 | 0.947901 | 0.457 | 0.536 |
| NM_019790    | 36  | 24  | 69  | 62 Fnta          | chr8 | 1881 | 27117721 | 0.947901 | 0.574 | 0.527 |
| NM_011599    | 19  | 21  | 33  | 22 Dusp26        | chr8 | 1747 | 32207301 | 0.947901 | 0.567 | 0.6   |
| NM_011018    | 19  | 21  | 22  | 24 Rbm13         | chr8 | 1857 | 32277035 | 0.813566 | 0.621 | 0.478 |
| NM_020050    | 16  | 20  | 109 | 131 Ppp2cb       | chr8 | 1836 | 34729872 | 0.947901 | 0.447 | 0.454 |
| NM_031998    | 58  | 24  | 66  | 77 Ubxd6         | chr8 | 2817 | 34745797 | 0.947901 | 0.443 | 0.462 |
| NM_080557    | 44  | 39  | 191 | 168 Dctn6        | chr8 | 926  | 35160287 | 0.783653 | 0.604 | 0.532 |
| NM_175212    | 32  | 23  | 38  | 18 Mfhas1        | chr8 | 6408 | 36739903 | 0.947901 | 0.71  | 0.679 |
| NM_008541    | 21  | 17  | 154 | 80 Tusc3         | chr8 | 1527 | 40068938 | 0.601754 | 0.528 | 0.658 |
| NM_172752    | 15  | 10  | 109 | 69 Vps37a        | chr8 | 6379 | 41636151 | 0.783653 | 0.509 | 0.612 |
| NM_001033270 | 14  | 11  | 97  | 67 Mtmr7         | chr8 | 3446 | 41692225 | 0.371307 | 0.408 | 0.591 |
| NM_029068    | 17  | 12  | 30  | 23 BC035537      | chr8 | 5479 | 46466670 | 0.780086 | 0.421 | 0.566 |
| NM_198102    | 24  | 7   | 45  | 27 Sorbs2        | chr8 | 6259 | 46911266 | 0.947901 | 0.6   | 0.625 |
| NM_025285    | 38  | 30  | 23  | 9 1810047C23Rik  | chr8 | 1556 | 47082155 | 0.947901 | 0.636 | 0.719 |
| NM_001024206 | 33  | 47  | 104 | 91 Spcs3         | chr8 | 3482 | 55610356 | 0.947901 | 0.484 | 0.533 |
| NM_012030    | 26  | 19  | 32  | 68 Scrg1         | chr8 | 700  | 59956198 | 0.433765 | 0.533 | 0.32  |
| NM_009223    | 82  | 61  | 36  | 37 Clcn3         | chr8 | 5238 | 63417370 | 0.750419 | 0.645 | 0.493 |
| NM_020584    | 27  | 13  | 26  | 18 Cpe           | chr8 | 2103 | 67098280 | 0.947901 | 0.676 | 0.591 |
| NM_009415    | 127 | 107 | 52  | 80 Sc4mol        | chr8 | 1824 | 67202518 | 0.947901 | 0.411 | 0.394 |
| NM_009311    | 37  | 51  | 34  | 95 Atp6v1b2      | chr8 | 2738 | 71636462 | 0.947901 | 0.261 | 0.264 |
| NM_028711    | 665 | 306 | 145 | 59 Ndufa13       | chr8 | 1266 | 72418107 | 0.159615 | 0.586 | 0.711 |
| NM_001034964 | 84  | 52  | 20  | 29 Sf4           | chr8 | 2287 | 72595806 | 0.783653 | 0.265 | 0.408 |
| NM_009409    | 39  | 32  | 40  | 37 Rab3a         | chr8 | 1526 | 73281819 | 0.947901 | 0.533 | 0.519 |
| NM_011647    | 15  | 13  | 45  | 119 Tpm4         | chr8 | 2082 | 74676017 | 0.947901 | 0.333 | 0.274 |
| NM_026959    | 17  | 15  | 16  | 23 2510049119Rik | chr8 | 1921 | 74746242 | 0.947901 | 0.451 | 0.41  |
| NM_011430    | 20  | 16  | 32  | 49 9130011J15Rik | chr8 | 2842 | 75094787 | 0.744899 | 0.298 | 0.395 |
| NM_027935    | 96  | 108 | 76  | 72 Large         | chr8 | 3669 | 75738156 | 0.947901 | 0.558 | 0.514 |
| NM_178703    | 20  | 18  | 22  | 21 AI931714      | chr8 | 2781 | 80104599 | 0.395208 | 0.758 | 0.512 |
| NM_030018    | 44  | 38  | 266 | 287 Lsm6         | chr8 | 2107 | 81336918 | 0.947901 | 0.466 | 0.481 |
| NM_016801    | 14  | 12  | 98  | 104 Abce1        | chr8 | 3813 | 82211570 | 0.947901 | 0.517 | 0.485 |
| NM_175101    | 24  | 23  | 22  | 20 Gab1          | chr8 | 4877 | 83324196 | 0.947901 | 0.5   | 0.524 |
| NM_001001491 | 13  | 26  | 187 | 232 Scoc         | chr8 | 1931 | 85966470 | 0.947901 | 0.426 | 0.446 |
| NM_008063    | 17  | 8   | 37  | 33 Gpsn2         | chr8 | 1146 | 86118339 | 0.329905 | 0.373 | 0.529 |
| NM_011585    | 32  | 25  | 11  | 111 Ddx39        | chr8 | 1634 | 86244486 | 0.947901 | 0.094 | 0.09  |
| NM_025435    | 48  | 39  | 129 | 160 D8Ertd738e   | chr8 | 603  | 86770184 | 0.947901 | 0.474 | 0.446 |
| NM_133352    | 24  | 21  | 10  | 27 Farsa         | chr8 | 1846 | 87392913 | 0.947901 | 0.212 | 0.27  |
| NM_011607    | 79  | 41  | 398 | 419 Prdx2        | chr8 | 942  | 87497998 | 0.947901 | 0.478 | 0.487 |
| NM_013835    | 17  | 14  | 27  | 22 Tnpo2         | chr8 | 4865 | 87581303 | 0.947901 | 0.541 | 0.551 |
| NM_013895    | 35  | 36  | 19  | 17 Dhps          | chr8 | 1332 | 87597202 | 0.947901 | 0.489 | 0.528 |
| NM_198214    | 16  | 15  | 43  | 24 Orc6l         | chr8 | 1300 | 87831663 | 0.754784 | 0.536 | 0.642 |
| NM_011590    | 82  | 94  | 19  | 22 Dnaja2        | chr8 | 2839 | 88064009 | 0.947901 | 0.538 | 0.463 |



|              |     |     |     |     |               |      |      |           |          |       |       |
|--------------|-----|-----|-----|-----|---------------|------|------|-----------|----------|-------|-------|
| NM_011416    | 48  | 48  | 166 | 186 | Neto2         | chr8 | 5646 | 88193572  | 0.602323 | 0.551 | 0.472 |
| NM_153059    | 27  | 14  | 42  | 30  | Itfg1         | chr8 | 2195 | 88360291  | 0.947901 | 0.571 | 0.583 |
| NM_019442    | 32  | 8   | 32  | 55  | Lonp2         | chr8 | 2872 | 89189673  | 0.945732 | 0.293 | 0.368 |
| NM_012058    | 26  | 21  | 34  | 12  | Heatr3        | chr8 | 3190 | 90695308  | 0.84104  | 0.816 | 0.739 |
| NM_024225    | 23  | 19  | 37  | 50  | Fto           | chr8 | 3586 | 93925771  | 0.783653 | 0.563 | 0.425 |
| NM_025335    | 28  | 32  | 247 | 175 | Gnao1         | chr8 | 2968 | 96490904  | 0.947901 | 0.591 | 0.585 |
| NM_011522    | 15  | 11  | 35  | 34  | Amfr          | chr8 | 3694 | 96524295  | 0.947901 | 0.533 | 0.507 |
| NM_025439    | 90  | 51  | 35  | 18  | Mt1           | chr8 | 402  | 96703158  | 0.947901 | 0.714 | 0.66  |
| NM_175328    | 35  | 19  | 15  | 13  | Arl2bp        | chr8 | 1930 | 97197779  | 0.409809 | 0.75  | 0.536 |
| NM_025804    | 71  | 62  | 47  | 28  | Ciapi1        | chr8 | 4327 | 97352265  | 0.947901 | 0.556 | 0.627 |
| NM_007854    | 24  | 15  | 31  | 15  | Gtl3          | chr8 | 1217 | 97946048  | 0.26307  | 0.379 | 0.674 |
| NM_013761    | 51  | 48  | 26  | 38  | Got2          | chr8 | 2345 | 98401634  | 0.844976 | 0.5   | 0.406 |
| NM_011428    | 55  | 40  | 25  | 12  | Tk2           | chr8 | 2385 | 106755112 | 0.690932 | 0.481 | 0.676 |
| NM_009215    | 52  | 34  | 11  | 15  | Dync1li2      | chr8 | 3145 | 106949372 | 0.883593 | 0.577 | 0.423 |
| NM_019953    | 17  | 19  | 41  | 22  | Hspc171       | chr8 | 757  | 107852818 | 0.947901 | 0.586 | 0.651 |
| NM_011990    | 14  | 30  | 10  | 18  | Nip7          | chr8 | 1350 | 109582693 | 0.42885  | 0.643 | 0.357 |
| NM_023672    | 25  | 16  | 17  | 21  | Nob1          | chr8 | 1647 | 109948654 | 0.879992 | 0.561 | 0.447 |
| NM_145390    | 33  | 28  | 58  | 41  | Psmc7         | chr8 | 1599 | 110104967 | 0.947901 | 0.561 | 0.586 |
| NM_153176    | 16  | 24  | 89  | 45  | 2400003C14Rik | chr8 | 2304 | 112207643 | 0.805861 | 0.578 | 0.664 |
| NM_177089    | 23  | 13  | 11  | 17  | Calb2         | chr8 | 1462 | 112680844 | 0.947901 | 0.308 | 0.393 |
| NM_001005507 | 44  | 70  | 35  | 22  | Cog4          | chr8 | 2754 | 113405390 | 0.677707 | 0.504 | 0.614 |
| NM_144825    | 52  | 35  | 63  | 57  | Cfdp1         | chr8 | 1215 | 114292454 | 0.947901 | 0.467 | 0.525 |
| NM_009263    | 22  | 13  | 12  | 13  | Kars          | chr8 | 1953 | 114527284 | 0.80737  | 0.63  | 0.48  |
| NM_020267    | 112 | 92  | 33  | 20  | Terf2ip       | chr8 | 3599 | 114543590 | 0.947901 | 0.675 | 0.623 |
| NM_013873    | 15  | 18  | 118 | 110 | AI427515      | chr8 | 3655 | 116895704 | 0.947901 | 0.565 | 0.518 |
| NM_025303    | 34  | 17  | 19  | 11  | BC060631      | chr8 | 4885 | 119483542 | 0.940846 | 0.517 | 0.633 |
| NM_024272    | 49  | 32  | 18  | 9   | Cdh13         | chr8 | 2290 | 121491953 | 0.86501  | 0.531 | 0.667 |
| NM_133854    | 11  | 20  | 118 | 83  | Hsdl1         | chr8 | 3140 | 122091813 | 0.710828 | 0.511 | 0.587 |
| NM_026669    | 82  | 69  | 29  | 26  | Cox4nb        | chr8 | 4933 | 123180786 | 0.947901 | 0.609 | 0.527 |
| NM_025382    | 36  | 38  | 46  | 37  | Map1lc3b      | chr8 | 1712 | 124121889 | 0.947901 | 0.5   | 0.554 |
| NM_029701    | 45  | 48  | 10  | 26  | Mvd           | chr8 | 1767 | 124967275 | 0.805322 | 0.417 | 0.278 |
| NM_172804    | 54  | 51  | 180 | 245 | Aprt          | chr8 | 866  | 125098539 | 0.947901 | 0.425 | 0.424 |
| NM_026933    | 28  | 27  | 23  | 25  | Spg7          | chr8 | 2558 | 125621394 | 0.947901 | 0.4   | 0.479 |
| NM_023055    | 11  | 15  | 32  | 8   | Rpl13         | chr8 | 710  | 125628985 | 0.465109 | 0.615 | 0.8   |
| NM_145076    | 17  | 11  | 84  | 62  | Tcf25         | chr8 | 2695 | 125927527 | 0.947901 | 0.534 | 0.575 |
| NM_130796    | 13  | 15  | 30  | 17  | Def8          | chr8 | 3756 | 125985376 | 0.689001 | 0.493 | 0.638 |
| NM_021335    | 44  | 45  | 30  | 8   | Dbdd1         | chr8 | 1564 | 126033850 | 0.77027  | 0.667 | 0.789 |
| NM_144867    | 120 | 10  | 33  | 27  | Rhou          | chr8 | 3367 | 126185003 | 0.520642 | 0.375 | 0.55  |
| NM_001076554 | 106 | 97  | 15  | 24  | Rab4a         | chr8 | 1382 | 126358704 | 0.805861 | 0.516 | 0.385 |
| NM_020618    | 38  | 15  | 35  | 37  | Abcb10        | chr8 | 4325 | 126491961 | 0.602769 | 0.679 | 0.486 |
| NM_133668    | 56  | 45  | 19  | 30  | Galnt2        | chr8 | 4131 | 126868087 | 0.179836 | 0.66  | 0.388 |
| NM_009261    | 31  | 24  | 16  | 27  | 2310022B05Rik | chr8 | 3326 | 127163444 | 0.947901 | 0.383 | 0.372 |
| NM_009274    | 40  | 36  | 32  | 22  | Tsnax         | chr8 | 2391 | 127556696 | 0.844355 | 0.689 | 0.593 |
| NM_013697    | 907 | 912 | 57  | 11  | Birc2         | chr9 | 3155 | 7834004   | 0.383093 | 0.633 | 0.838 |
| NM_181266    | 17  | 8   | 49  | 46  | Mttr2         | chr9 | 4935 | 13609824  | 0.947901 | 0.469 | 0.516 |
| NM_134151    | 27  | 27  | 39  | 24  | Endod1        | chr9 | 4470 | 14158589  | 0.947901 | 0.634 | 0.619 |
| NM_178648    | 31  | 39  | 73  | 47  | 0610040D20Rik | chr9 | 1152 | 14314955  | 0.805861 | 0.485 | 0.608 |
| NM_025899    | 143 | 94  | 15  | 10  | Mrpl4         | chr9 | 1312 | 20811282  | 0.859423 | 0.719 | 0.6   |
| NM_023045    | 21  | 10  | 27  | 17  | Dpy19l1       | chr9 | 4474 | 24245217  | 0.947901 | 0.533 | 0.614 |
| NM_026031    | 15  | 17  | 100 | 107 | Sep7          | chr9 | 2398 | 25115934  | 0.86501  | 0.559 | 0.483 |
| NM_025645    | 25  | 18  | 12  | 13  | Acad8         | chr9 | 2865 | 26785908  | 0.947901 | 0.37  | 0.48  |
| NM_153194    | 15  | 10  | 21  | 18  | Vps26b        | chr9 | 3608 | 26837523  | 0.947901 | 0.5   | 0.538 |

|              |     |     |     |                  |      |       |           |          |       |       |
|--------------|-----|-----|-----|------------------|------|-------|-----------|----------|-------|-------|
| NM_011981    | 38  | 42  | 139 | 16 Opcml         | chr9 | 6002  | 28727877  | 0.947901 | 0.848 | 0.897 |
| NM_024475    | 16  | 20  | 90  | 54 Aplp2         | chr9 | 3490  | 30969362  | 0.728089 | 0.534 | 0.625 |
| NM_175552    | 19  | 10  | 15  | 23 Kirrel3       | chr9 | 3698  | 34842454  | 0.936394 | 0.5   | 0.395 |
| NM_133756    | 51  | 18  | 18  | 29 Ddx25         | chr9 | 1675  | 35354456  | 0.947901 | 0.423 | 0.383 |
| NM_018871    | 137 | 97  | 20  | 17 Fez1          | chr9 | 1289  | 36671093  | 0.947901 | 0.543 | 0.541 |
| NM_028599    | 30  | 18  | 407 | 212 AW551984     | chr9 | 4293  | 39407239  | 0.947901 | 0.665 | 0.658 |
| NM_021324    | 12  | 13  | 110 | 90 Scn3b         | chr9 | 4267  | 40098830  | 0.419101 | 0.423 | 0.55  |
| NM_178811    | 14  | 14  | 20  | 11 Sorl1         | chr9 | 6938  | 41830507  | 0.301202 | 0.364 | 0.645 |
| NM_025970    | 29  | 26  | 13  | 13 Hmbs          | chr9 | 1611  | 44152188  | 0.947901 | 0.5   | 0.5   |
| NM_001081750 | 10  | 19  | 19  | 13 Slc37a4       | chr9 | 2109  | 44206506  | 0.947901 | 0.68  | 0.594 |
| NM_001081413 | 26  | 25  | 117 | 110 Trappc4      | chr9 | 1196  | 44215247  | 0.853013 | 0.571 | 0.515 |
| NM_178027    | 24  | 24  | 30  | 28 1500035H01Rik | chr9 | 3337  | 44600498  | 0.886203 | 0.591 | 0.517 |
| NM_133349    | 149 | 149 | 23  | 23 Mll1          | chr9 | 16439 | 44653576  | 0.947901 | 0.577 | 0.5   |
| NM_028360    | 18  | 10  | 290 | 321 Fxyd6        | chr9 | 1804  | 45203247  | 0.329905 | 0.552 | 0.475 |
| NM_021499    | 53  | 56  | 81  | 39 Bace1         | chr9 | 4099  | 45668385  | 0.947901 | 0.663 | 0.675 |
| NM_023716    | 258 | 109 | 49  | 93 Rnf214        | chr9 | 3782  | 45708049  | 0.477128 | 0.5   | 0.345 |
| NM_009466    | 23  | 16  | 85  | 67 Pafah1b2      | chr9 | 4241  | 45775842  | 0.835862 | 0.483 | 0.559 |
| NM_173392    | 15  | 11  | 30  | 21 Zfp259        | chr9 | 2984  | 46090473  | 0.947901 | 0.556 | 0.588 |
| NM_001013745 | 33  | 11  | 254 | 645 Rplp1        | chr9 | 468   | 61761110  | 0.947901 | 0.281 | 0.283 |
| NM_027946    | 45  | 32  | 22  | 27 Anp32a        | chr9 | 2105  | 62225136  | 0.947901 | 0.429 | 0.449 |
| NM_021885    | 72  | 53  | 29  | 50 Ppib          | chr9 | 979   | 65914391  | 0.468051 | 0.52  | 0.367 |
| NM_009450    | 237 | 49  | 29  | 50 Snx22         | chr9 | 2555  | 65914391  | 0.468051 | 0.52  | 0.367 |
| NM_144839    | 49  | 25  | 58  | 29 Grin1a        | chr9 | 2172  | 71326465  | 0.665352 | 0.533 | 0.667 |
| NM_011650    | 89  | 112 | 33  | 56 Arpp19        | chr9 | 4032  | 74906008  | 0.210985 | 0.539 | 0.371 |
| NM_011752    | 20  | 16  | 125 | 83 Myo5a         | chr9 | 11684 | 75069246  | 0.947901 | 0.621 | 0.601 |
| NM_033526    | 27  | 24  | 27  | 21 Leo1          | chr9 | 2192  | 75314042  | 0.793113 | 0.7   | 0.563 |
| NM_001081300 | 27  | 17  | 110 | 215 Scg3         | chr9 | 2161  | 75491221  | 0.085256 | 0.537 | 0.338 |
| NM_025418    | 48  | 35  | 39  | 47 Elovl5        | chr9 | 2773  | 77830507  | 0.933287 | 0.529 | 0.453 |
| NM_023249    | 30  | 28  | 45  | 35 Fbxo9         | chr9 | 1858  | 77956845  | 0.947901 | 0.618 | 0.563 |
| NM_023585    | 23  | 21  | 58  | 67 Tmem30a       | chr9 | 3652  | 79617189  | 0.710828 | 0.621 | 0.464 |
| NM_013699    | 31  | 46  | 22  | 37 Hmgn3         | chr9 | 823   | 83040061  | 0.783653 | 0.514 | 0.373 |
| NM_198617    | 20  | 20  | 93  | 121 Atp1b3       | chr9 | 1833  | 96240772  | 0.247107 | 0.575 | 0.435 |
| NM_023230    | 74  | 76  | 46  | 23 Clstn2        | chr9 | 4494  | 97483046  | 0.693737 | 0.553 | 0.667 |
| NM_178411    | 9   | 18  | 51  | 53 Rbp1          | chr9 | 2628  | 98345026  | 0.947901 | 0.508 | 0.49  |
| NM_145367    | 35  | 43  | 37  | 22 Copb2         | chr9 | 3043  | 98480708  | 0.525209 | 0.407 | 0.627 |
| NM_025388    | 67  | 54  | 42  | 9 Pccb           | chr9 | 2291  | 100913217 | 0.80737  | 0.722 | 0.824 |
| NM_177325    | 42  | 38  | 92  | 140 Anapc13      | chr9 | 381   | 102536488 | 0.299056 | 0.595 | 0.397 |
| NM_172054    | 24  | 32  | 12  | 21 Abhd14a       | chr9 | 1258  | 106347918 | 0.641958 | 0.556 | 0.364 |
| NM_012038    | 21  | 27  | 16  | 36 Gnai2         | chr9 | 2177  | 107522390 | 0.910682 | 0.376 | 0.308 |
| NM_133208    | 37  | 11  | 29  | 14 Rbm5          | chr9 | 3085  | 107643156 | 0.947901 | 0.696 | 0.674 |
| NM_172735    | 41  | 16  | 49  | 42 lhpk1         | chr9 | 4429  | 107948058 | 0.947901 | 0.483 | 0.538 |
| NM_145967    | 17  | 16  | 30  | 29 Nicn1         | chr9 | 2103  | 108198160 | 0.926181 | 0.586 | 0.508 |
| NM_011673    | 15  | 19  | 135 | 78 Rhoa          | chr9 | 2126  | 108239985 | 0.80737  | 0.517 | 0.634 |
| NM_172745    | 60  | 56  | 45  | 27 Nme6          | chr9 | 1025  | 109745090 | 0.498119 | 0.758 | 0.625 |
| NM_011743    | 13  | 15  | 123 | 96 Mtap4         | chr9 | 5681  | 109984838 | 0.947901 | 0.559 | 0.562 |
| NM_026893    | 32  | 26  | 18  | 13 Cspg5         | chr9 | 2144  | 110158649 | 0.945911 | 0.493 | 0.581 |
| NM_207301    | 55  | 25  | 114 | 116 Clasp2       | chr9 | 5627  | 113827795 | 0.947901 | 0.482 | 0.496 |
| NM_026521    | 86  | 118 | 84  | 105 Ubp1         | chr9 | 3749  | 113884724 | 0.947901 | 0.403 | 0.444 |
| NM_021539    | 116 | 111 | 21  | 10 Cnot10        | chr9 | 2853  | 114510483 | 0.947901 | 0.686 | 0.677 |
| NM_025842    | 304 | 311 | 309 | 266 Rpl14        | chr9 | 935   | 120483427 | 0.892484 | 0.568 | 0.537 |
| NM_028209    | 18  | 8   | 116 | 49 Exosc7        | chr9 | 1037  | 123045047 | 0.365698 | 0.576 | 0.703 |

Table S1.11. Known imprinted genes reported to be imprinted in placenta.

| mouse Chr band | type           | RefSeq ID / GenBank ID | Entrez gene ID | MGI symbol            | expressed allele | References |
|----------------|----------------|------------------------|----------------|-----------------------|------------------|------------|
| 2 E1-H3        | coding-gene    | AF175305               | -              | Nesp                  | M                | 1          |
| 2 E5           | coding-gene    | NM_025961.5            | 67092          | Gatm                  | M                | 2          |
| 6 A1           | coding-gene    | NM_011360.2            | 20392          | Sgce                  | P                | 3          |
| 6 A1           | coding-gene    | NM_001040611.1         | 170676         | Peg10                 | P                | 4          |
| 6 A1           | coding-gene    | NM_023048.5            | 65255          | Asb4                  | M                | 5          |
| 6 A1           | coding-gene    | NM_181595.3            | 243725         | Ppp1r9a               | M                | 4          |
| 7 F5           | coding-gene    | NM_010514.2            | 16002          | Igf2                  | P                | 6,7        |
| 7 F5           | antisense      | NR_002855              | -              | Igf2as                | P                | 8          |
| 7 F5           | coding-gene    | NM_008554.2            | 17173          | Ascl2 (Mash2)         | M                | 9          |
| 7 F5           | coding-gene    | AF175771               | -              | Phemx (Tssc6)         | M                | 10         |
| 7 F5           | coding-gene    | NM_020285.1            | 56844          | Tssc4                 | M                | 11         |
| 7 F5           | coding-gene    | NM_009434              | 22113          | Phlda2 (Tdag51)       | M                | 12         |
| 7 F5           | coding-gene    | NM_008672.2            | 17955          | Nap1l4                | M                | 13         |
| 7 F5           | coding-gene    | NM_024290.3            | 79201          | Tnfrsf23              | M                | 14         |
| 7 F5           | coding-gene    | NM_024289.2            | 79196          | Osbp15                | M                | 13         |
| 10 A1          | coding-gene    | NM_009538.1            | 22634          | Plagl1                | P                | 15         |
| 10 C3          | coding-gene    | NM_007833.4            | 13179          | Dcn                   | M                | 5          |
| 11 A1          | coding-gene    | NM_010345.3            | 14783          | Grb10 (Meg1)          | M                | 16,17      |
| 12 F1          | coding-gene    | NM_010052.4            | 13386          | Dlk1 (Peg9)           | P                | 18         |
| 12 F1          | Non-coding RNA | XR_035480.1            | 17263          | Gtl2 (Meg3)           | M                | 19         |
| 12 F1          | coding-gene    | NM_184109.1            | 353326         | Rtl1 (Peg11)          | P                | 20         |
| 12 F1          | antisense      | -                      | -              | anti-Rtl1 (antiPeg11) | M                | 20         |
| 12 F1          | miRNA          | -                      | -              | miR-127 (antiPeg11)   | M                | 20         |
| 12 F1          | miRNA          | -                      | -              | miR-136 (antiPeg11)   | M                | 20         |
| 12 F1          | miRNA          | -                      | -              | miR-370               | M                | 21         |
| 12 F1          | Non-coding RNA | AJ517767               | -              | Mirg                  | M                | 21         |
| 15 F1          | coding-gene    | NM_027052.3            | 69354          | Slc38a4               | P                | 5          |
| 17 A1          | coding-gene    | NM_013667.2            | 20518          | Slc22a2               | M                | 22         |
| 17 A1          | coding-gene    | NM_011395.2            | 20519          | Slc22a3               | M                | 22         |

References:

- <sup>1</sup> J. Peters, S. F. Wroe, C. A. Wells et al., *Proceedings of the National Academy of Sciences of the United States of America* **96** (7), 3830 (1999).
- <sup>2</sup> L. L. Sandell, X. J. Guan, R. Ingram et al., *Proceedings of the National Academy of Sciences of the United States of America* **100** (8), 4622 (2003).
- <sup>3</sup> G. Piras, A. El Kharroubi, S. Kozlov et al., *Molecular and cellular biology* **20** (9), 3308 (2000).
- <sup>4</sup> R. Ono, H. Shiura, H. Aburatani et al., *Genome Res* **13** (7), 1696 (2003).
- <sup>5</sup> Y. Mizuno, Y. Sotomaru, Y. Katsuzawa et al., *Biochemical and biophysical research communications* **290** (5), 1499 (2002).
- <sup>6</sup> M. Hemberger, C. Redies, R. Krause et al., *Development genes and evolution* **208** (7), 393 (1998).
- <sup>7</sup> T. M. DeChiara, E. J. Robertson, and A. Efstratiadis, *Cell* **64** (4), 849 (1991).
- <sup>8</sup> T. Moore, M. Constancia, M. Zubair et al., *Proceedings of the National Academy of Sciences of the United States of America* **94** (23), 12509 (1997).

- <sup>9</sup> F. Guillemot, T. Caspary, S. M. Tilghman et al., *Nature genetics* **9** (3), 235 (1995).
- <sup>10</sup> D. Umlauf, Y. Goto, R. Cao et al., *Nature genetics* **36** (12), 1296 (2004).
- <sup>11</sup> M. Paulsen, O. El-Maarri, S. Engemann et al., *Human molecular genetics* **9** (12), 1829 (2000).
- <sup>12</sup> N. Qian, D. Frank, D. O'Keefe et al., *Human molecular genetics* **6** (12), 2021 (1997).
- <sup>13</sup> S. Engemann, M. Strodicke, M. Paulsen et al., *Human molecular genetics* **9** (18), 2691 (2000).
- <sup>14</sup> L. Clark, M. Wei, G. Cattoretti et al., *BMC genetics* **3**, 11 (2002).
- <sup>15</sup> M. Kamiya, H. Judson, Y. Okazaki et al., *Human molecular genetics* **9** (3), 453 (2000).
- <sup>16</sup> T. Hikichi, T. Kohda, T. Kaneko-Ishino et al., *Nucleic acids research* **31** (5), 1398 (2003).
- <sup>17</sup> N. Miyoshi, Y. Kuroiwa, T. Kohda et al., *Proceedings of the National Academy of Sciences of the United States of America* **95** (3), 1102 (1998).
- <sup>18</sup> S. Takada, M. Tevendale, J. Baker et al., *Curr Biol* **10** (18), 1135 (2000).
- <sup>19</sup> J. V. Schmidt, P. G. Matteson, B. K. Jones et al., *Genes & development* **14** (16), 1997 (2000).
- <sup>20</sup> H. Seitz, N. Youngson, S. P. Lin et al., *Nature genetics* **34** (3), 261 (2003).
- <sup>21</sup> H. Seitz, H. Royo, M. L. Bortolin et al., *Genome Res* **14** (9), 1741 (2004).
- <sup>22</sup> R. Zwart, F. Sleutels, A. Wutz et al., *Genes & development* **15** (18), 2361 (2001).



Table S1.12. Known imprinted genes covered by assembly of Solexa reads.

| RefSeq_ID    | PWD x AKR  |            | AKR x PWD  |            | Gene_name | Chr   | RefSeq_len |
|--------------|------------|------------|------------|------------|-----------|-------|------------|
|              | AKR_counts | PWD_counts | AKR_counts | PWD_counts |           |       |            |
| NM_011245    | 16         | 0          | 0          | 20         | Rasgrf1   | chr9  | 4243       |
| NR_002864    | 168        | 0          | 6          | 74         | Peg13     | chr15 | 4745       |
| XR_035484    | 1          | 339        | 193        | 1          | Gtl2      | chr12 | 1890       |
| NM_001077507 | 181        | 214        | 101        | 96         | Gnas      | chr2  | 3733       |
| NM_001033962 | 3          | 10         | 4          | 2          | Ube3a     | chr7  | 4910       |
| NM_010514    | 52         | 43         | 20         | 27         | Igf2      | chr7  | 4038       |
| NM_008672    | 9          | 12         | 61         | 76         | Nap1l4    | chr7  | 2283       |
| NM_009876    | 0          | 8          | 13         | 0          | Cdkn1c    | chr7  | 1849       |
| NM_010345    | 2          | 3          | 6          | 10         | Grb10     | chr11 | 5015       |
| NM_021432    | 22         | 0          | 0          | 67         | Nap1l5    | chr6  | 1909       |
| NM_181595    | 36         | 54         | 67         | 26         | Ppp1r9a   | chr6  | 9547       |
| NR_001592    | 2          | 14         | 61         | 1          | H19       | chr7  | 2615       |

Table S1.13. Novel SNPs called in known imprinted genes from assembly of the Solexa reads.

| Gene    | SNP         | RefSeq<br>pos | RefSeq<br>length | RefSeq<br>Allele | AKR<br>allele | PWD<br>allele | PWD x AKR  |            | AKR x PWD  |            | Pyro verification   |
|---------|-------------|---------------|------------------|------------------|---------------|---------------|------------|------------|------------|------------|---------------------|
|         |             |               |                  |                  |               |               | AKR_counts | PWD_counts | AKR_counts | PWD_counts |                     |
| Rasgrf1 | NES14232081 | 3736          | 4243             | T                | T             | C             | 1          | 0          | 0          | 8          |                     |
| Rasgrf1 | newSNP1     | 4176          | 4243             | A                | A             | G             | 12         | 0          | 0          | 6          | YES                 |
| Rasgrf1 | newSNP2     | 4202          | 4243             | C                | C             | T             | 3          | 0          | 0          | 6          |                     |
| Peg13   | newSNP1     | 4333          | 4745             | C                | C             | T             | 42         | 0          | 4          | 31         |                     |
| Peg13   | newSNP2     | 4347          | 4745             | C                | C             | T             | 38         | 0          | 2          | 21         |                     |
| Peg13   | newSNP3     | 4426          | 4745             | G                | G             | A             | 88         | 0          | 0          | 22         | YES                 |
| Gtl2    | newSNP1     | 1557          | 1890             | T                | T             | C             | 1          | 172        | 19         | 1          | YES                 |
| Gtl2    | newSNP2     | 1820          | 1890             | G                | G             | A             | 0          | 48         | 67         | 0          |                     |
| Gtl2    | newSNP3     | 1822          | 1890             | A                | A             | G             | 0          | 53         | 61         | 0          |                     |
| Gtl2    | newSNP4     | 1846          | 1890             | A                | A             | G             | 0          | 66         | 46         | 0          |                     |
| Gnas    | newSNP1     | 3162          | 3733             | G                | G             | C             | 181        | 214        | 101        | 96         | YES                 |
| Ube3a   | newSNP1     | 2363          | 4910             | T                | T             | C             | 3          | 10         | 4          | 2          | YES                 |
| Igf2    | newSNP1     | 3831          | 4308             | G                | G             | A             | 52         | 43         | 20         | 27         | YES                 |
| Nap1l4  | newSNP1     | 2221          | 2283             | C                | C             | T             | 9          | 12         | 61         | 76         | too close to 3'-end |
| Cdkn1c  | newSNP1     | 1727          | 1849             | C                | C             | T             | 0          | 8          | 13         | 0          | YES                 |
| Grb10   | newSNP1     | 4514          | 5015             | G                | G             | A             | 2          | 3          | 6          | 10         | YES                 |
| Nap1l5  | newSNP1     | 1224          | 1909             | C                | C             | T             | 22         | 0          | 0          | 67         | YES                 |
| Ppp1r9a | NES10359547 | 9050          | 9547             | T                | T             | G             | 9          | 16         | 14         | 13         |                     |
| Ppp1r9a | newSNP1     | 9202          | 9547             | A                | A             | G             | 12         | 20         | 28         | 7          |                     |
| Ppp1r9a | NES10359548 | 9211          | 9547             | C                | C             | G             | 15         | 18         | 25         | 6          |                     |
| H19     | newSNP1     | 2237          | 2615             | G                | G             | A             | 1          | 5          | 30         | 0          |                     |
| H19     | newSNP2     | 2401          | 2615             | A                | A             | G             | 1          | 5          | 8          | 0          |                     |
| H19     | newSNP3     | 2437          | 2615             | G                | G             | A             | 0          | 4          | 23         | 1          | YES                 |



Table S1.14. Categories of Perlegen SNP in the RefSeq sequences.

| Categories                      | Coordinates filter | Text match | Status                                | Number of RefSeq sequences | % Total |
|---------------------------------|--------------------|------------|---------------------------------------|----------------------------|---------|
| Consistent                      | YES                | YES        | Consistent                            | 172,104                    | 83.31%  |
| Corrected by text match *       | YES                | YES        | Inconsistent, corrected by text match | 15,679                     | 7.59%   |
| Coordinates information only ** | YES                | NO         | Coordinates only                      | 18,806                     | 9.10%   |
| Total                           |                    |            |                                       | 206,589                    |         |

\*: There are discrepancy between the RefSeq and genomic sequence alignment. The gaps in the alignment could be corrected by the text match.

\*\* : Not all coordinate filtered SNPs have text match results, because of the exon-intron boundary problem.



Table S1.15. Consistency of Perlegen SNP alleles and the RefSeq alleles.

| Categories                                                     | Example |             |               | Counts  | % of Total |
|----------------------------------------------------------------|---------|-------------|---------------|---------|------------|
|                                                                | RefSeq  | P_reference | P_alternative |         |            |
| RefSeq allele is consistent with Perlegen reference allele     | A       | A           | C             | 202,718 | 98.13%     |
| RefSeq allele is consistent with Perlegen alternative allele * | A       | C           | A             | 3,829   | 1.85%      |
| RefSeq allele is NOT consistent with Perlegen alleles **       | A       | G           | T             | 42      | 0.02%      |
| Total                                                          |         |             |               | 206,589 |            |

\*: The Perlegen reference allele is from the reference genome sequence, which is C57BL/6. Not all the RefSeq sequences come from the C57BL/6 strain whose genome has been sequenced, so we saw 1.85% of the total SNPs matching the Perlegen alternative allele.

\*\* : The inconsistent SNPs could be due to Perlegen genotyping error, RefSeq sequencing error or RNA editing.

Table S1.16. Solexa SNP categories.

| Num | Desc                                   | RefSeq | P1 | P2 | AKR | PWD | Solexa |
|-----|----------------------------------------|--------|----|----|-----|-----|--------|
| 0   | inconsistencies                        |        |    |    |     |     |        |
| 1   | complete consistent (SNPs)             | A      | A  | C  | A   | C   | A      |
| 2   | complete consistent (not a SNP)        | A      | A  | C  | C   | C   | C      |
| 3   | consistent with one N (not matching N) | A      | A  | C  | N   | C   | C      |
| 4   | consistent with one N (matching N)     | A      | A  | C  | N   | C   | A      |
| 5   | consistent with two Ns                 | A      | A  | C  | N   | N   | C      |

**RefSeq:** the SNP allele in the RefSeq database.

**P1:** the Perlgene reference SNP allele (the C57BL/6 strain).

**P2:** the Perlgene alternative SNP allele.

**AKR:** the AKR allele from Perlegen database (A, T, C, G or N, N stands for missing data or not tested).

**PWD:** PWD allele from Perlegen database (A, T, C, G or N, N stands for missing data or not tested).

**Solexa:** SNP allele extracted from matched Solexa reads.

Table S1.17. Class 1 SNPs excluded from the analysis.

| SNP_ID      | SNP_ID      | SNP_ID      | SNP_ID      |
|-------------|-------------|-------------|-------------|
| NES14876696 | NES10420240 | NES13745918 | NES12249028 |
| NES09738047 | NES10420226 | NES11943616 | NES15568316 |
| NES08906420 | NES10420223 | NES09032590 | NES17087050 |
| NES09734134 | NES15049856 | NES08986232 | NES17087048 |
| NES08906420 | NES14979137 | NES08986229 | NES17087049 |
| NES09621998 | NES14351208 | NES14949585 | NES17087047 |
| NES11209005 | NES11238747 | NES16255894 | NES11827956 |
| NES15138749 | NES17483578 | NES17479911 | NES09237212 |
| NES08431278 | NES17483577 | NES16859105 | NES09237207 |
| NES15875741 | NES17463891 | NES09012401 | NES09237201 |
| NES15647702 | NES11670031 | NES17235026 | NES09237213 |
| NES11971118 | NES16150391 | NES12718299 | NES09237210 |
| NES17027650 | NES09025562 | NES12266934 | NES09237205 |
| NES08459947 | NES16206267 | NES08788167 | NES09237202 |
| NES08459950 | NES08572902 | NES08788166 | NES16593135 |
| NES15266287 | NES14261667 | NES12691145 | NES08484090 |
| NES14293779 | NES12712485 | NES12691167 | NES14546805 |
| NES14293775 | NES17750869 | NES11550691 | NES14546803 |
| NES14293777 | NES17750860 | NES11550693 | NES14546811 |
| NES14293778 | NES15156758 | NES12399504 | NES14546813 |
| NES11209751 | NES15695629 | NES15930027 | NES14546807 |
| NES13703477 | NES11369015 | NES08378706 | NES16561739 |
| NES10739665 | NES10714421 | NES08378705 | NES14293775 |
| NES10660704 | NES10714429 | NES08547137 | NES14293777 |
| NES16285283 | NES15073396 | NES15189427 | NES14293778 |
| NES16285283 | NES09233319 | NES08868052 | NES14293779 |
| NES10873154 | NES09233320 | NES12433551 | NES16563387 |
| NES15266522 | NES15285346 | NES17079130 | NES16781606 |
| NES15266522 | NES09279050 | NES08544194 | NES15422496 |
| NES15266522 | NES14776963 | NES15552234 | NES09167411 |
| NES15259264 | NES14876696 | NES14104611 | NES11326902 |
| NES10312342 | NES11238747 | NES15678869 | NES15421000 |
| NES14871332 | NES17010767 | NES12919589 | NES13029528 |
| NES08458564 | NES09446275 | NES16623938 | NES09693916 |
| NES14225365 | NES08483436 | NES08906420 | NES08644572 |
| NES10319035 | NES08483415 | NES09026926 | NES13748736 |
| NES16130718 | NES08483435 | NES13973227 | NES16127294 |
| NES16130720 | NES16702750 | NES17024295 | NES11608738 |
| NES16358702 | NES17409492 | NES17024369 | NES11608740 |
| NES08666099 | NES15643653 | NES08405830 | NES10311402 |
| NES13522888 | NES17358191 | NES14982676 | NES16285283 |
| NES10420230 | NES17043132 | NES15266522 | NES16739532 |
| NES10420224 | NES09155409 | NES17291091 | NES13649859 |

| <u>SNP_ID</u> | <u>SNP_ID</u> | <u>SNP_ID</u> | <u>SNP_ID</u> |
|---------------|---------------|---------------|---------------|
| NES17291097   | NES09171102   | NES17612490   | NES10699965   |
| NES17291098   | NES11190333   | NES10873154   | NES13919030   |
| NES14029298   | NES14557213   | NES14052359   | NES14733595   |
| NES10448144   | NES14822643   | NES08660120   | NES14438492   |
| NES12846890   | NES13822060   | NES14659667   | NES10273169   |
| NES16711194   | NES09782280   | NES11943616   | NES15074478   |
| NES17234293   | NES10390975   | NES15693632   | NES09342784   |
| NES13826540   | NES10963117   | NES16578142   | NES11596049   |
| NES08427844   | NES14871332   | NES13826540   | NES14639695   |
| NES13494138   | NES15679880   | NES16188935   | NES10463847   |
| NES15990474   | NES16980640   | NES09721304   | NES15461042   |
| NES13837750   | NES16980639   | NES13651334   | NES17507704   |
| NES09097215   | NES10255687   | NES09166157   | NES11610293   |
| NES10281979   | NES15068410   | NES09166158   | NES14897932   |
| NES10463847   | NES16151877   | NES11941242   | NES11611860   |
| NES10374048   | NES16239673   | NES11943616   | NES08512189   |
| NES16734327   | NES15259264   | NES11943616   | NES15989288   |
| NES17335704   | NES15917484   | NES11943616   | NES15989279   |
| NES14641192   | NES15917483   | NES11943616   | NES15989289   |
| NES10387308   | NES15917573   | NES11943616   | NES16280702   |
| NES12729871   | NES08589567   | NES11943616   | NES13440047   |
| NES09451085   | NES11605743   | NES11943616   | NES09662684   |
| NES15815096   | NES11274422   | NES14765284   |               |
| NES16541439   | NES17539058   | NES13626579   |               |
| NES16541431   | NES16301862   | NES15719085   |               |
| NES16541234   | NES16590360   | NES17122816   |               |
| NES08533698   | NES10319035   | NES15072297   |               |
| NES08533495   | NES16696227   | NES13664543   |               |
| NES16084189   | NES13506336   | NES11088397   |               |
| NES14293779   | NES11254770   | NES11088396   |               |
| NES14293775   | NES15219205   | NES15284784   |               |
| NES14293777   | NES17346264   | NES13782115   |               |
| NES14293778   | NES17346231   | NES16151953   |               |
| NES14173600   | NES14438492   | NES09201112   |               |
| NES13653669   | NES08481849   | NES09201111   |               |
| NES17613413   | NES16234958   | NES09201113   |               |
| NES17613433   | NES15890171   | NES09201066   |               |
| NES17612622   | NES08732510   | NES16918136   |               |
| NES14770826   | NES08766821   | NES11984138   |               |
| NES14770886   | NES16824504   | NES11984136   |               |
| NES10744906   | NES14364801   | NES11984133   |               |
| NES13655958   | NES14364643   | NES15329638   |               |
| NES11277835   | NES11391135   | NES12216222   |               |
| NES10384314   | NES11391139   | NES08975230   |               |



Table S1.18. Summary of the Perlegen-Solexa consistency.

| Category | Desc.                 | Before Manual correction |            |                  | After Manual correction |            |                  |
|----------|-----------------------|--------------------------|------------|------------------|-------------------------|------------|------------------|
|          |                       | Counts                   | Percentage | % of Informative | Counts                  | Percentage | % of Informative |
| 1        | Uninformative         | 175572                   | 84.65%     | -                | 175687                  | 84.71%     | -                |
| 2        | Multiallele           | 2757                     | 1.33%      | 8.66%            | 318                     | 0.15%      | 1.05%            |
| 3        | Inconsistent          | 149                      | 0.07%      | 0.47%            | 161                     | 0.08%      | 0.53%            |
| 4        | Confirmed             | 23133                    | 11.15%     | 72.67%           | 25289                   | 12.19%     | 83.21%           |
| 5        | Called                | 4055                     | 1.96%      | 12.74%           | 4127                    | 1.99%      | 13.58%           |
| 6        | DoubleN_consistent    | 461                      | 0.22%      | 1.45%            | 496                     | 0.24%      | 1.63%            |
| 7        | SingleN_uninformative | 1280                     | 0.62%      | -                | 1329                    | 0.64%      | -                |
| Total    |                       | 207407                   | 100.00%    |                  | 207407                  | 100.00%    |                  |

Table S1.19. Differential methylation status at the DMR of known imprinted genes.

| #  | mouse Chr band | type           | RefSeq ID / GenBank ID                                                                                                                            | MGI symbol  | Expressed allele | Type         | DMR                                                                                 | Methylated allele | Mouse_Tissue                                  | Refer |
|----|----------------|----------------|---------------------------------------------------------------------------------------------------------------------------------------------------|-------------|------------------|--------------|-------------------------------------------------------------------------------------|-------------------|-----------------------------------------------|-------|
| 1  | 2 E1-H3        | coding-gene    | AF175305                                                                                                                                          | Nesp        | M                | No_RefSeq    | CpG island is methylated at the paternal allele                                     | P                 | Embryos                                       | 4     |
| 2  | 2 E1-H3        | coding-gene    | AJ245739                                                                                                                                          | Gnasxl      | P                | No_RefSeq    | CpG island is methylated at the maternal allele                                     | M                 | Pg embryos                                    | 3, 4  |
| 3  | 2 E1-H3        | Non-coding RNA | -                                                                                                                                                 | Exon1A      | P                | No_RefSeq    | CpG island is methylated at the maternal allele                                     | M                 | Pg embryos                                    | 3     |
| 4  | 2 E1-H3        | coding-gene    | NM_001077507.1;<br>NM_001077510.1;<br>NM_010309.3;<br>NM_019690.2;<br>NM_022000.2;<br>NM_201616.1;<br>NM_201617.1;<br>NM_201618.1;<br>NR_003258.1 | Gnas        | M                | Covered      | Nesp DMR is paternally methylated; Gnasxl and Exon1A DMRs are maternally methylated | M                 | Pg embryos                                    | 3,5   |
| 5  | 2 E1-H3        | antisense*     | NR_002846                                                                                                                                         | Nespas      | P                | No_SNP       | -                                                                                   | -                 | -                                             | -     |
| 6  | 2 E5           | coding-gene    | NM_025961.5                                                                                                                                       | Gatm        | M                | Covered      | The CpG island near the genes is not methylated in both alleles                     | -                 | Placenta and embryonic liver                  | 6     |
| 7  | 2 H1           | coding-gene    | NM_010923.2;<br>NM_180960.2                                                                                                                       | Nnat (peg5) | P                | Covered      | 5 differentially methylated CpG sites within the gene region                        | M                 | Embryos/Pg embryos                            | 2, 3  |
| 8  | 5 E1           | pseudogene     | NG_005709                                                                                                                                         | Mkrr1-ps1   | P                | No_RefSeq    | Fully methylated from both alleles; Not transcribed and not an imprinted gene       | P+M               | Not mentioned in the paper                    | 11    |
| 9  | 6 A1           | coding-gene    | NM_001042725.1;<br>NM_007588.2                                                                                                                    | Calcr       | M                | Covered      | Not assayed                                                                         | -                 | -                                             | 7     |
| 10 | 6 A1           | coding-gene    | NM_011360.2                                                                                                                                       | Sgce        | P                | Covered      | Promoter region CpG island is differential methylated                               | M                 | Pg embryos/E10 embryos and placenta           | 3, 9  |
| 11 | 6 A1           | coding-gene    | NM_001040611.1;<br>NM_130877.2                                                                                                                    | Peg10       | P                | No_counts    | Promoter region CpG island is differential methylated                               | M                 | E10 embryos and placenta                      | 9     |
| 12 | 6 A1           | coding-gene    | NM_181595.3                                                                                                                                       | Ppp1r9a     | M                | Covered      | the CpG island is not differentially methylated                                     | -                 | normal, mUPD7, and pUPD7 lymphoblastoid cells | 8     |
| 13 | 6 A1           | coding-gene    | NM_023048.5                                                                                                                                       | Asb4        | M                | Covered      | Promoter region CpG island is NOT differential methylated                           | -                 | E10 embryos and placenta                      | 9     |
| 14 | 6 A3           | coding-gene    | NM_008590.1                                                                                                                                       | Mest (Peg1) | P                | No_SNP       | CpG island is methylated at the maternal allele                                     | M                 | Pg embryos                                    | 3     |
| 15 | 6 A3           | antisense      | NR_002845                                                                                                                                         | Copg2as2    | M                | No_chr6_hits | -                                                                                   | -                 | -                                             | -     |
| 16 | 6 A3           | coding-gene    | NM_017478.2                                                                                                                                       | Copg2       | P                | Covered      | Higher paternal methylation at the promoter-associated CpG island                   | P                 | Brain                                         | 10    |

| #  | mouse Chr band | type           | RefSeq ID / GenBank ID                                 | MGIsymbol     | Expressed allele | Type      | DMR                                                                                   | Methylated allele | Mouse_Tissue                                       | Refer |
|----|----------------|----------------|--------------------------------------------------------|---------------|------------------|-----------|---------------------------------------------------------------------------------------|-------------------|----------------------------------------------------|-------|
| 17 | 6 C1           | coding-gene    | NM_021432.2                                            | Nap1l5        | P                | Covered   | CpG island is methylated at the maternal allele                                       | M                 | Pg embryos                                         | 3     |
| 18 | 7 A2-B1        | coding-gene    | NM_008817.2                                            | Peg3          | P                | Covered   | CpG island is methylated at the maternal allele                                       | M                 | Pg embryos                                         | 3     |
| 19 | 7 A2-B1        | coding-gene    | NM_011769.3                                            | Zim1          | M                | Covered   | DMR not studied; close to Peg3                                                        | -                 | -                                                  | -     |
| 20 | 7 A2-B1        | coding-gene    | XM_922461,<br>XM_489216                                | Zim2          | M**              | No_SNP    | DMR not studied; close to Peg3                                                        | -                 | -                                                  | -     |
| 21 | 7 A2-B1        | coding-gene    | NM_021323.2                                            | Usp29         | P                | No_counts | DMR not studied; close to Peg3                                                        | -                 | -                                                  | -     |
| 22 | 7 A2-B1        | antisense      | AF365932                                               | Zim3          | M                | No_RefSeq | -                                                                                     | -                 | -                                                  | -     |
| 23 | 7 A2-B1        | Non-coding RNA | AF365933                                               | Zfp264        | P                | No_RefSeq | DMR not studied; close to Peg3                                                        | -                 | -                                                  | -     |
| 24 | 7 B5           | coding-gene    | NM_013788.1                                            | Peg12 (Frat3) | P                | No_SNP    | CpG island is methylation from the maternal allele                                    | M                 | brain of wild-type,Tg-PWS(del) and Tg-AS(del) mice | 12    |
| 25 | 7 B5           | coding-gene    | NM_011746.2                                            | Mkx3 (Zfp127) | P                | No_counts | Preferentially maternal methylation                                                   | M                 | adult brain                                        | 13    |
| 26 | 7 B5           | antisense      | -                                                      | Zfp127as      | P                | No_RefSeq | -                                                                                     | -                 | -                                                  | -     |
| 27 | 7 B5           | coding-gene    | XM_622091.3                                            | Magel2        | P                | Covered   | DMR not studied; close to Peg12                                                       | -                 | -                                                  | -     |
| 28 | 7 B5           | coding-gene    | NM_010882.3                                            | Ndn           | P                | No_counts | Partially methylated at both paternal and maternal alleles                            | -                 | adult brain                                        | 14    |
| 29 | 7 B5           | miRNA          | -                                                      | Nccr          | P                | No_RefSeq | DMR not studied; close to Peg12                                                       | -                 | -                                                  | -     |
| 30 | 7 B5           | coding-gene    | NM_033174,<br>NM_001082962,<br>NM_005678,<br>NM_022804 | Snurf         | P                | Covered   | CpG island is methylated at the maternal allele                                       | M                 | Pg embryos                                         | 3     |
| 31 | 7 B5           | coding-gene    | NM_001082961.1;<br>NM_001082962.1;<br>NM_013670.3      | Snrpn         | P                | Covered   | CpG island is methylated at the maternal allele                                       | M                 | Pg embryos                                         | 3     |
| 32 | 7 B5           | snoRNA         | -                                                      | HBII-13       | P                | No_RefSeq | -                                                                                     | -                 | -                                                  | -     |
| 33 | 7 B5           | snoRNA         | AF241256                                               | Pwcr1         | P                | No_RefSeq | -                                                                                     | -                 | -                                                  | -     |
| 34 | 7 B5           | snoRNA         | -                                                      | HBII-52       | P                | No_RefSeq | -                                                                                     | -                 | -                                                  | -     |
| 35 | 7 B5           | antisense      | AK049008                                               | UBE3A-AS      | P                | No_RefSeq | -                                                                                     | -                 | -                                                  | -     |
| 36 | 7 B5           | coding-gene    | NM_001033962.1;<br>NM_011668.2;<br>NM_173010.3         | Ube3a         | M                | Covered   | DMR not studied; close to Snrpn                                                       | -                 | -                                                  | -     |
| 37 | 7 F3           | coding-gene    | DQ648020                                               | Inpp5f_v2     | P                | Covered   | CpG1 is not methylated; CpG2 is DMR and it is only methylated in the paternal allele. | P                 | B6xCast.(8 weeks brain and kidney)                 | 1     |
| 38 | 7 F5           | Non-coding RNA | NR_001592                                              | H19           | M                | Covered   | upstream DMR is methylated only from the paternal allele                              | P                 | Not mentioned in the paper                         | 15    |
| 39 | 7 F5           | coding-gene    | NM_010514.2                                            | Igf2          | P                | Covered   | DMR is methylated only from the paternal allele                                       | P                 | Not mentioned in the paper                         | 15    |

| #  | mouse Chr band | type           | RefSeq ID / GenBank ID      | MGIsymbol         | Expressed allele | Type      | DMR                                                                                 | Methylated allele | Mouse_Tissue                                            | Refer |
|----|----------------|----------------|-----------------------------|-------------------|------------------|-----------|-------------------------------------------------------------------------------------|-------------------|---------------------------------------------------------|-------|
| 40 | 7 F5           | antisense      | NR_002855                   | Igf2as            | P                | No_SNP    | -                                                                                   | -                 | -                                                       | -     |
| 41 | 7 F5           | coding-gene    | NM_008387.3                 | Ins2              | P                | No_SNP    | DMR not studied; close to Igf2                                                      | -                 | -                                                       | -     |
| 42 | 7 F5           | coding-gene    | NM_008554.2                 | Ascl2 (Mash2)     | M                | No_counts | No differential methylation was detected                                            | -                 | Embryos, placenta, V endoderm, YS mesoderm, adult liver | 16    |
| 43 | 7 F5           | coding-gene    | AF175771                    | Phemx (Tssc6)     | M                | No_RefSeq | No differential methylation was detected                                            | -                 | Embryos, placenta, V endoderm, YS mesoderm, adult liver | 16    |
| 44 | 7 F5           | coding-gene    | NM_133655.1                 | Cd81 (Impt1)      | M                | No_SNP    | No differential methylation was detected                                            | -                 | Embryos, placenta, V endoderm, YS mesoderm, adult liver | 16    |
| 45 | 7 F5           | coding-gene    | NM_020285.1; NM_138631.1    | Tssc4             | M                | No_SNP    | Slightly methylated on the paternal allele in the trophoblast and yolk sac endoderm | P                 | Embryos, placenta, V endoderm, YS mesoderm, adult liver | 16    |
| 46 | 7 F5           | coding-gene    | NM_008434.2                 | Kcnq1             | M                | No_counts | No differential methylation was detected                                            | -                 | Embryos, placenta, V endoderm, YS mesoderm, adult liver | 16    |
| 47 | 7 F5           | antisense      | NR_001461                   | Kcnq1ot1          | P                | No_SNP    | Maternal methylation at the KvDMR1 (IC2) CpG island                                 | M                 | Embryos, placenta, V endoderm, YS mesoderm, adult liver | 16    |
| 48 | 7 F5           | coding-gene    | NM_009876.3                 | Cdkn1c (p57KIP2)  | M                | Covered   | Paternal methylation at the two Cdkn1c CpG islands                                  | P                 | Embryos, placenta, V endoderm, YS mesoderm, adult liver | 16    |
| 49 | 7 F5           | Non-coding RNA | AF313042                    | Msuit1            | M                | No_RefSeq | No differential methylation was detected                                            | -                 | Embryos, placenta, V endoderm, YS mesoderm, adult liver | 16    |
| 50 | 7 F5           | coding-gene    | NM_001042760.1; NM_008767.2 | Slc22a18          | M                | No_counts | No differential methylation was detected                                            | -                 | Embryos, placenta, V endoderm, YS mesoderm, adult liver | 16    |
| 51 | 7 F5           | coding-gene    | NM_009434                   | Phlda2 (Tdag51)   | M                | No_SNP    | No differential methylation was detected                                            | -                 | Embryos, placenta, V endoderm, YS mesoderm, adult liver | 16    |
| 52 | 7 F5           | coding-gene    | NM_008672.2                 | Nap114            | M                | Covered   | No differential methylation was detected                                            | -                 | Embryos, placenta, V endoderm, YS mesoderm, adult liver | 16    |
| 53 | 7 F5           | coding-gene    | NM_024290.3                 | Tnfrsf23          | M                | Covered   | No differential methylation was detected                                            | -                 | Embryos, placenta, V endoderm, YS mesoderm, adult liver | 16    |
| 54 | 7 F5           | coding-gene    | NM_024289.2                 | Osbp15            | M                | Covered   | No differential methylation was detected                                            | -                 | Embryos, placenta, V endoderm, YS mesoderm, adult liver | 16    |
| 55 | 9 E3           | Non-coding RNA | AK015891                    | 4930524O08Rik,A19 | P                | No_RefSeq | -                                                                                   | -                 | -                                                       | -     |
| 56 | 9 E3           | coding-gene    | NM_001039655.1; NM_011245.2 | Rasgrf1           | P                | Covered   | The DMR is methylated at the paternal allele                                        | P                 | Tail                                                    | 17    |

| #  | mouse Chr band | type           | RefSeq ID / GenBank ID                                      | MGIsymbol                 | Expressed allele | Type      | DMR                                                                                                                                 | Methylated allele | Mouse_Tissue              | Refer |
|----|----------------|----------------|-------------------------------------------------------------|---------------------------|------------------|-----------|-------------------------------------------------------------------------------------------------------------------------------------|-------------------|---------------------------|-------|
| 57 | 10 A1          | coding-gene    | NM_009538.1                                                 | Plagl1                    | P                | No_counts | CpG island is methylated at the maternal allele                                                                                     | M                 | Pg embryos                | 3     |
| 58 | 10 C3          | coding-gene    | NM_007833.4                                                 | Dcn                       | M                | Covered   | DMR not studied                                                                                                                     | -                 | -                         | -     |
| 59 | 11 A1          | coding-gene    | NM_010345.3                                                 | Grb10 (Meg1)              | M(major type)    | Covered   | 3 CpG islands. CpG1 is not differentially methylated. CpG2 is methylated only at the maternall allele.CpG3 is a tissue-specific DMR | M                 | Brain, UPD cell lines     | 18    |
| 60 | 11 A3          | coding-gene    | NM_144514.2                                                 | Commd1                    | M                | Covered   | CpG island is methylated at the maternal allele                                                                                     | M                 | Kidney                    | 19    |
| 61 | 11 A3          | coding-gene    | NM_011663.2                                                 | Zrsr1 (U2af1-rs1)         | P                | Covered   | CpG island is methylated at the maternal allele                                                                                     | M                 | Pg embryos                | 3     |
| 62 | 12 F1          | coding-gene    | NM_010052.4                                                 | Dlk1 (Peg9)               | P                | No_counts | The promoter region is not differentially methylated                                                                                | -                 | -                         | 20    |
| 63 | 12 F1          | Non-coding RNA | -                                                           | Dlk1downstreamtranscripts | P                | No_RefSeq | -                                                                                                                                   | -                 | -                         | -     |
| 64 | 12 F1          | Non-coding RNA | NR_003633.1;<br>XR_035480.1;<br>XR_035483.1;<br>XR_035484.1 | Gtl2 (Meg3)               | M                | Covered   | Promoter CpG island is methylated at the paternal allele                                                                            | P                 | mUPD12 and pUPD12 embryos | 20    |
| 65 | 12 F1          | miRNA          | -                                                           | miR-337                   | M                | No_RefSeq | -                                                                                                                                   | -                 | -                         | -     |
| 66 | 12 F1          | coding-gene    | NM_184109.1                                                 | Rtl1 (Peg11)              | P                | Covered   | Close to Gtl2 DMR                                                                                                                   | -                 | -                         | -     |
| 67 | 12 F1          | antisense      | -                                                           | anti-Rtl1 (antiPeg11)     | M                | No_RefSeq | -                                                                                                                                   | -                 | -                         | -     |
| 68 | 12 F1          | miRNA          | -                                                           | miR-127 (antiPeg11)       | M                | No_RefSeq | -                                                                                                                                   | -                 | -                         | -     |
| 69 | 12 F1          | miRNA          | -                                                           | miR-136 (antiPeg11)       | M                | No_RefSeq | -                                                                                                                                   | -                 | -                         | -     |
| 70 | 12 F1          | snoRNA         | XM_901568                                                   | Rian (Meg8)               | M                | No_SNP    | Close to Gtl2 DMR                                                                                                                   | -                 | -                         | 21    |
| 71 | 12 F1          | miRNA          | -                                                           | miR-370                   | M                | No_RefSeq | -                                                                                                                                   | -                 | -                         | -     |
| 72 | 12 F1          | snoRNA         | -                                                           | MBII-78                   | M                | No_RefSeq | -                                                                                                                                   | -                 | -                         | -     |
| 73 | 12 F1          | snoRNA         | -                                                           | MBII-19                   | M                | No_RefSeq | -                                                                                                                                   | -                 | -                         | -     |
| 74 | 12 F1          | snoRNA         | -                                                           | 14q(0)                    | M                | No_RefSeq | -                                                                                                                                   | -                 | -                         | -     |
| 75 | 12 F1          | snoRNA         | -                                                           | MBII-48                   | M                | No_RefSeq | -                                                                                                                                   | -                 | -                         | -     |
| 76 | 12 F1          | snoRNA         | -                                                           | MBII-49                   | M                | No_RefSeq | -                                                                                                                                   | -                 | -                         | -     |
| 77 | 12 F1          | snoRNA         | -                                                           | MBII-426                  | M                | No_RefSeq | -                                                                                                                                   | -                 | -                         | -     |
| 78 | 12 F1          | snoRNA         | -                                                           | MBII-343                  | M                | No_RefSeq | -                                                                                                                                   | -                 | -                         | -     |
| 79 | 12 F1          | Non-coding RNA | AJ517767                                                    | Mirg                      | M                | No_RefSeq | Close to Gtl2 DMR                                                                                                                   | -                 | -                         | 21    |
| 80 | 12 F1          | miRNA          | -                                                           | miR-411                   | M                | No_RefSeq | -                                                                                                                                   | -                 | -                         | -     |
| 81 | 12 F1          | miRNA          | -                                                           | miR-380                   | M                | No_RefSeq | -                                                                                                                                   | -                 | -                         | -     |
| 82 | 12 F1          | miRNA          | -                                                           | miR-376b                  | M                | No_RefSeq | -                                                                                                                                   | -                 | -                         | -     |
| 83 | 12 F1          | miRNA          | -                                                           | miR-376                   | M                | No_RefSeq | -                                                                                                                                   | -                 | -                         | -     |
| 84 | 12 F1          | miRNA          | -                                                           | miR-134                   | M                | No_RefSeq | -                                                                                                                                   | -                 | -                         | -     |
| 85 | 12 F1          | miRNA          | -                                                           | miR-154                   | M                | No_RefSeq | -                                                                                                                                   | -                 | -                         | -     |
| 86 | 12 F1          | miRNA          | -                                                           | miR-410                   | M                | No_RefSeq | -                                                                                                                                   | -                 | -                         | -     |



| #  | mouse Chr band | type           | RefSeq ID / GenBank ID      | MGI symbol | Expressed allele | Type      | DMR                                               | Methylated allele | Mouse_Tissue                   | Refer |
|----|----------------|----------------|-----------------------------|------------|------------------|-----------|---------------------------------------------------|-------------------|--------------------------------|-------|
| 87 | 12 F1          | coding-gene    | NM_172119.2                 | Dio3       | P                | No_SNP    | Close to Gtl2 DMR                                 | -                 | -                              | -     |
| 88 | 14 D2          | coding-gene    | NM_172812.2                 | Htr2a      | M                | No_counts | DMR not studied                                   | -                 | -                              | -     |
| 89 | 15 D3          | Non-coding RNA | NR_002864                   | Peg13      | P                | Covered   | CpG island is methylated at the maternal allele   | M                 | Pg embryos                     | 3     |
| 90 | 15 D3          | coding-gene    | NM_001033876                | Kcnk9      | M                | No_SNP    | CpG island is methylated at the maternal allele   | M                 | brain                          | 22    |
| 91 | 15 F1          | coding-gene    | NM_027052.3                 | Slc38a4    | P                | Covered   | CpG island is methylated at the maternal allele   | M                 | Pg embryos                     | 3     |
| 92 | 17 A1          | coding-gene    | NM_010515.2                 | Igf2r      | M                | No_counts | -                                                 | -                 | -                              | -     |
| 93 | 17 A1          | antisense      | NR_002853                   | Air        | P                | No_SNP    | CpG island is methylated at the maternal allele   | M                 | brain                          | 23    |
| 94 | 17 A1          | coding-gene    | NM_013667.2                 | Slc22a2    | M                | Covered   | Regulated by Igf2r-Air DMR                        | -                 | -                              | 24    |
| 95 | 17 A1          | coding-gene    | NM_011395.2                 | Slc22a3    | M                | No_counts | Regulated by Igf2r-Air DMR                        | -                 | -                              | 24    |
| 96 | 18 A2-B2       | coding-gene    | NM_008378.2                 | Impact     | P                | Covered   | CpG island is methylated at the maternal allele   | M                 | F1 hybrids of B6 and JF, tails | 25    |
| 97 | X D            | Non-coding RNA | NR_001463.2;<br>NR_001570.1 | Xist       | P                | No_SNP    | CpG island is methylated in sperm, but not oocyte | P                 | -                              | 26    |
| 98 | X D            | antisense      | NR_002844.1                 | Tsix       | M                | No_SNP    | -                                                 | -                 | -                              | -     |

\*: The DMR of the antisense transcript is usually the same as the sense one, since they are closely linked.

#### References:

- <sup>1</sup> J. D. Choi, L. A. Underkoffler, A. J. Wood et al., *Molecular and cellular biology* **25** (13), 5514 (2005).
- <sup>2</sup> N. Kikyo, C. M. Williamson, R. M. John et al., *Developmental biology* **190** (1), 66 (1997).
- <sup>3</sup> R. J. Smith, W. Dean, G. Konfortova et al., *Genome research* **13** (4), 558 (2003).
- <sup>4</sup> J. Peters, S. F. Wroe, C. A. Wells et al., *Proceedings of the National Academy of Sciences of the United States of America* **96** (7), 3830 (1999).
- <sup>5</sup> J. Liu, S. Yu, D. Litman et al., *Molecular and cellular biology* **20** (16), 5808 (2000).
- <sup>6</sup> L. L. Sandell, X. J. Guan, R. Ingram et al., *Proceedings of the National Academy of Sciences of the United States of America* **100** (8), 4622 (2003).
- <sup>7</sup> H. Hoshiya, M. Meguro, A. Kashiwagi et al., *Journal of human genetics* **48** (4), 208 (2003).
- <sup>8</sup> K. Nakabayashi, S. Makino, S. Minagawa et al., *Journal of medical genetics* **41** (8), 601 (2004).
- <sup>9</sup> R. Ono, H. Shiura, H. Aburatani et al., *Genome research* **13** (7), 1696 (2003).
- <sup>10</sup> J. Yun, C. W. Park, Y. J. Lee et al., *Mamm Genome* **14** (6), 376 (2003).
- <sup>11</sup> T. A. Gray, A. Wilson, P. J. Fortin et al., *Proceedings of the National Academy of Sciences of the United States of America* **103** (32), 12039 (2006).
- <sup>12</sup> J. H. Chai, D. P. Locke, T. Ohta et al., *Mamm Genome* **12** (11), 813 (2001).
- <sup>13</sup> A. Hershko, A. Razin, and R. Shemer, *Gene* **234** (2), 323 (1999).
- <sup>14</sup> M. L. Hanel and R. Wevrick, *Molecular and cellular biology* **21** (7), 2384 (2001).
- <sup>15</sup> A. C. Bell and G. Felsenfeld, *Nature* **405** (6785), 482 (2000).
- <sup>16</sup> A. Lewis, K. Mitsuya, D. Umlauf et al., *Nature genetics* **36** (12), 1291 (2004).
- <sup>17</sup> B. J. Yoon, H. Herman, A. Sikora et al., *Nature genetics* **30** (1), 92 (2002).

- <sup>18</sup> P. Arnaud, D. Monk, M. Hitchins et al., *Human molecular genetics* **12** (9), 1005 (2003).
- <sup>19</sup> Z. Zhang, K. Joh, H. Yatsuki et al., *Gene* **366** (1), 77 (2006).
- <sup>20</sup> S. Takada, M. Tevendale, J. Baker et al., *Curr Biol* **10** (18), 1135 (2000).
- <sup>21</sup> J. Cavaille, H. Seitz, M. Paulsen et al., *Human molecular genetics* **11** (13), 1527 (2002).
- <sup>22</sup> N. Ruf, S. Bahring, D. Galetzka et al., *Human molecular genetics* **16** (21), 2591 (2007).
- <sup>23</sup> J. F. Hu, K. A. Balaguru, R. D. Ivaturi et al., *Biochemical and biophysical research communications* **257** (2), 604 (1999).
- <sup>24</sup> R. Zwart, F. Sleutels, A. Wutz et al., *Genes & development* **15** (18), 2361 (2001).
- <sup>25</sup> K. Okamura, Y. Hagiwara-Takeuchi, T. Li et al., *Genome research* **10** (12), 1878 (2000).
- <sup>26</sup> L. E. McDonald, C. A. Paterson, and G. F. Kay, *Genomics* **54** (3), 379 (1998).
